# Supplementary material for: Syntheses of indolo[1,2-a]quinazolinone derivatives via palladium catalyzed intramolecular C–H amidation
Source: Royal Society of Chemistry journal article supplement (doi:10.1039/c3ra44798g), 2013-11-21
Supplement: c3ra44798g.pdf [file c3ra44798g.pdf]

# Supporting Information

## Syntheses of Indolo[1,2-a]quinazolinone derivatives via Palladium Catalyzed Intramolecular C-H Amidation

Trimurtulu Kotipalli, Veerababurao Kavala, Donala Janreddy, Chun-Wei Kuo,  
Ting-Shen Kuo, Hsiu-Ni Huang, Chiu-Hui He and Ching-Fa Yao\*

*Department of Chemistry, National Taiwan Normal University, 88, Sec. 4, Tingchow  
Road, Taipei, Taiwan 116, R.O.C.*

[cheyaoef@ntnu.edu.tw](mailto:cheyaoef@ntnu.edu.tw)

## Contents

|                                               |   |
|-----------------------------------------------|---|
| 1. X-ray crystallographic data of compound 1b | 2 |
| 2. <sup>1</sup> H and <sup>13</sup> C NMR     | 4 |

## X-Ray Crystallographic Data of 1b (ccdc number 958648)

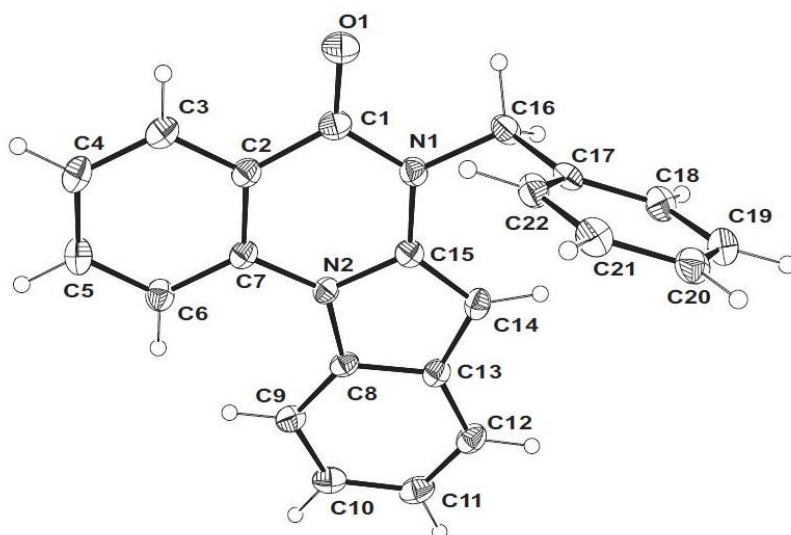

Table 1. Crystal data and structure refinement for **1b**

|                                 |                                                  |                 |
|---------------------------------|--------------------------------------------------|-----------------|
| Identification code             | a13777                                           |                 |
| Empirical formula               | C <sub>22</sub> H <sub>16</sub> N <sub>2</sub> O |                 |
| Formula weight                  | 324.37                                           |                 |
| Temperature                     | 200(2) K                                         |                 |
| Wavelength                      | 0.71073 Å                                        |                 |
| Crystal system                  | Monoclinic                                       |                 |
| Space group                     | P 21/c                                           |                 |
| Unit cell dimensions            | a = 15.4838(6) Å                                 | α = 90°.        |
|                                 | b = 13.2567(5) Å                                 | β = 98.951(2)°. |
|                                 | c = 7.8274(3) Å                                  | γ = 90°.        |
| Volume                          | 1587.12(11) Å <sup>3</sup>                       |                 |
| Z                               | 4                                                |                 |
| Density (calculated)            | 1.357 Mg/m <sup>3</sup>                          |                 |
| Absorption coefficient          | 0.084 mm <sup>-1</sup>                           |                 |
| F(000)                          | 680                                              |                 |
| Crystal size                    | 0.79 x 0.12 x 0.07 mm <sup>3</sup>               |                 |
| Theta range for data collection | 2.03 to 25.02°.                                  |                 |
| Index ranges                    | -18 ≤ h ≤ 17, -15 ≤ k ≤ 15, -8 ≤ l ≤ 9           |                 |
| Reflections collected           | 10463                                            |                 |
| Independent reflections         | 2791 [R(int) = 0.0284]                           |                 |
| Completeness to theta = 25.02°  | 99.7 %                                           |                 |

|                                   |                                             |
|-----------------------------------|---------------------------------------------|
| Absorption correction             | multi-scan                                  |
| Max. and min. transmission        | 0.9941 and 0.9364                           |
| Refinement method                 | Full-matrix least-squares on F <sup>2</sup> |
| Data / restraints / parameters    | 2791 / 0 / 226                              |
| Goodness-of-fit on F <sup>2</sup> | 0.704                                       |
| Final R indices [I > 2sigma(I)]   | R1 = 0.0377, wR2 = 0.0994                   |
| R indices (all data)              | R1 = 0.0618, wR2 = 0.1363                   |
| Largest diff. peak and hole       | 0.274 and -0.357 e.Å <sup>-3</sup>          |

# Spectra Copies 1a-19a, 1b- 19b

<sup>1</sup>H of N-CH<sub>3</sub> starting material

7.9444  
7.9409  
7.9220  
7.6966  
7.6933  
7.6799  
7.6771  
7.6758  
7.6018  
7.5982  
7.5827  
7.5793  
7.5641  
7.5603  
7.5236  
7.5047  
7.4861  
7.4452  
7.4258  
7.2601  
7.2411  
7.2287  
7.2204  
7.1987  
7.1961  
7.1822  
7.1788  
7.1654  
7.1621  
6.7139  
6.7060  
5.1440

2.4985  
2.4863

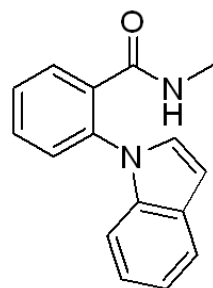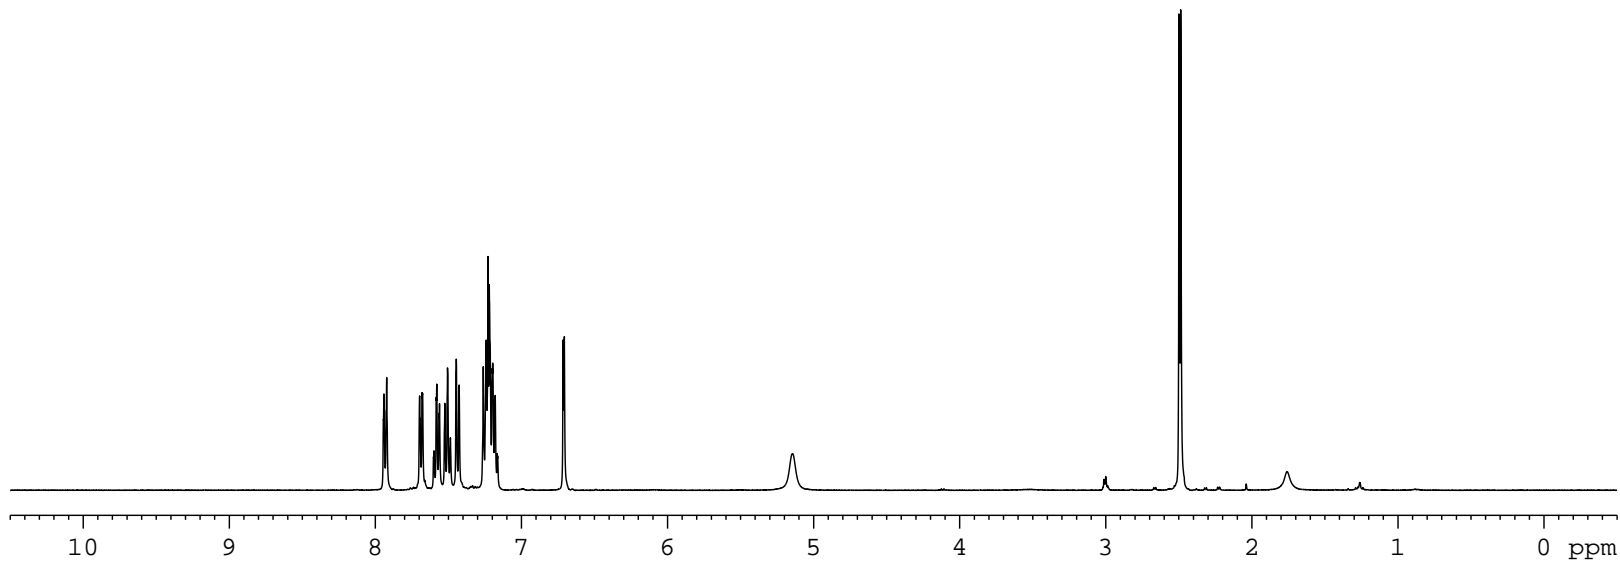

1.000  
1.018  
1.080  
1.069  
1.077  
4.014  
0.979

0.955

3.026

Current Data Parameters  
NAME Trimurthulu  
EXPNO 43  
PROCNO 1

F2 - Acquisition Parameters  
Date\_ 20120511  
Time 18.13  
INSTRUM spect  
PROBHD 5 mm BBO BB-1H  
PULPROG zg30  
TD 32768  
SOLVENT CDCl<sub>3</sub>  
NS 16  
DS 0  
SWH 7246.377 Hz  
FIDRES 0.221142 Hz  
AQ 2.2611110 sec  
RG 90.5  
DW 69.000 usec  
DE 6.50 usec  
TE 298.8 K  
D1 2.0000000 sec  
TD0 1

===== CHANNEL f1 =====  
NUC1 1H  
P1 11.70 usec  
PL1 4.00 dB  
SFO1 400.1324008 MHz

F2 - Processing parameters  
SI 16384  
SF 400.1300088 MHz  
WDW EM  
SSB 0  
LB 0 Hz  
GB 0  
PC 1.00

13C

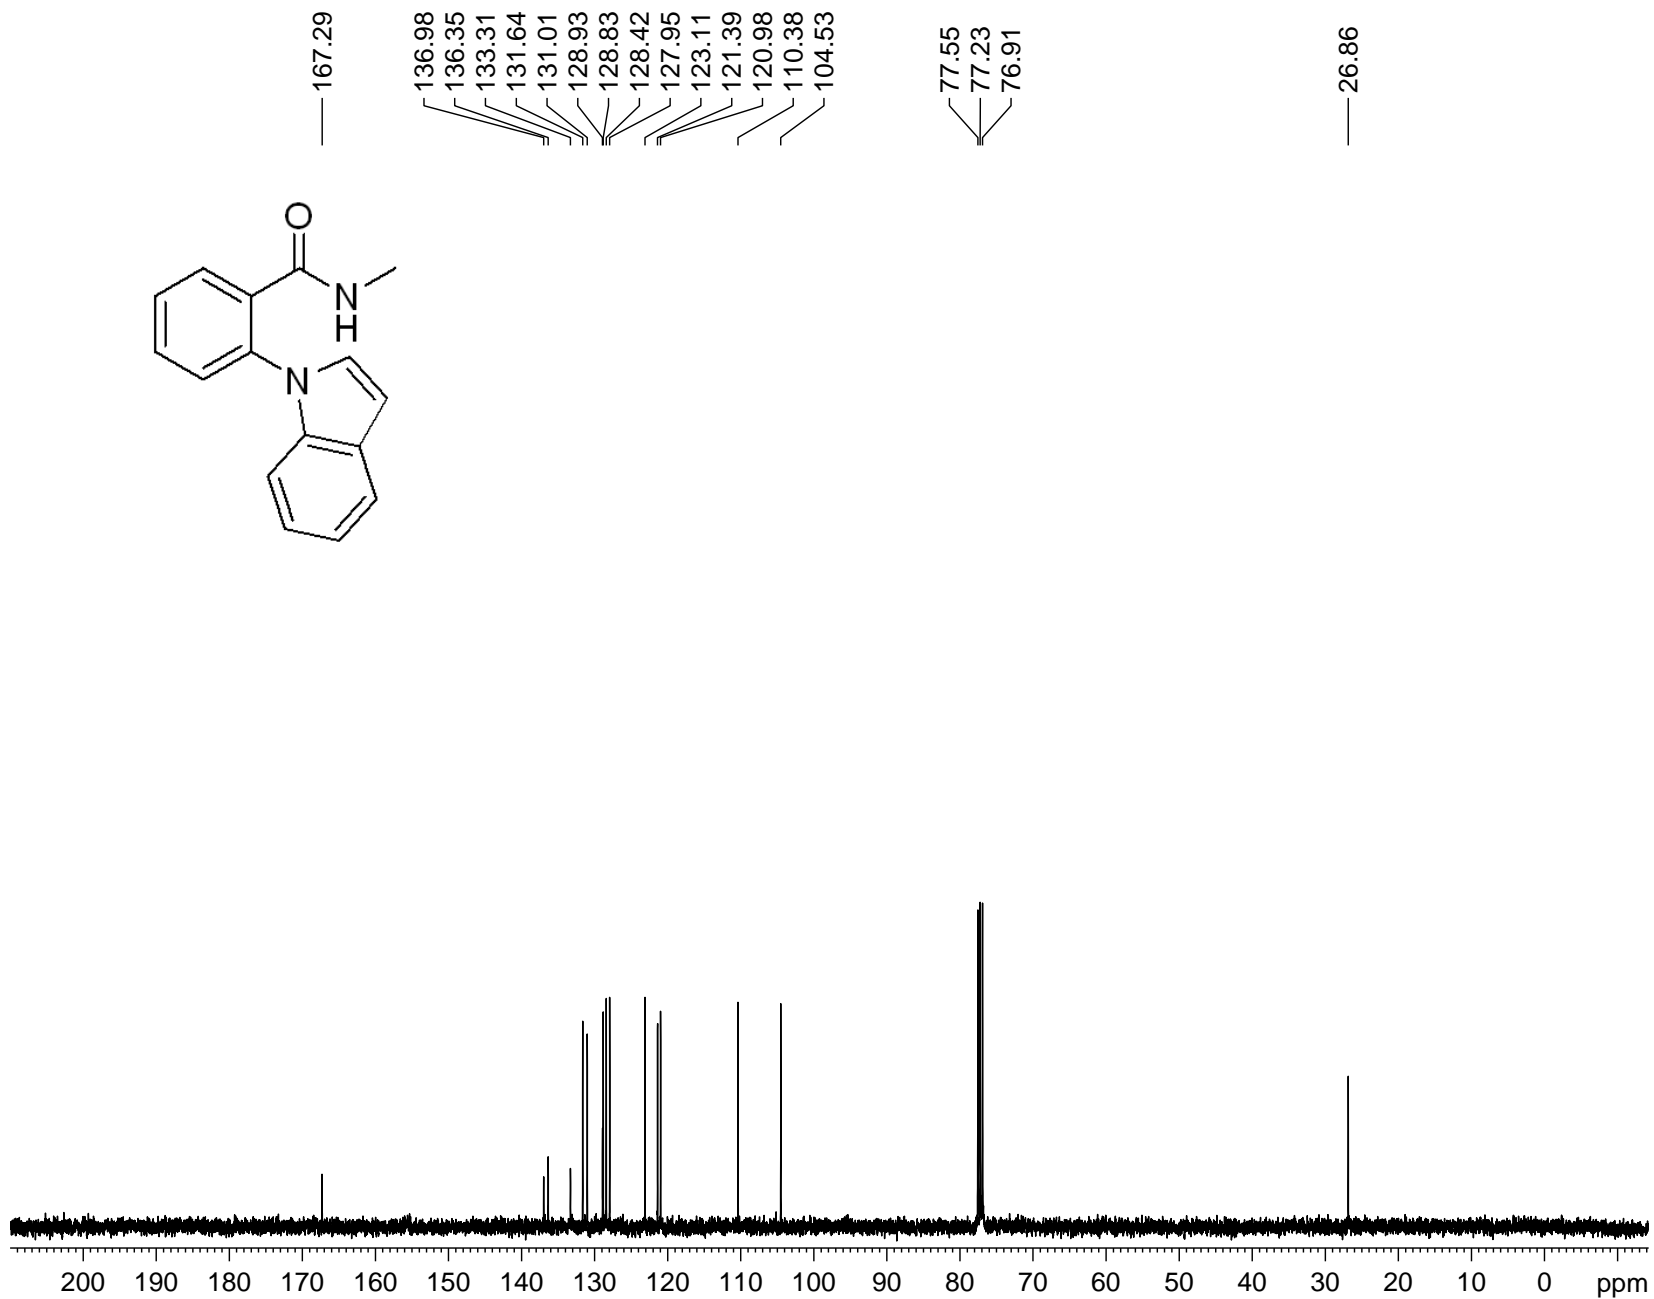

Current Data Parameters

NAME Trimurthulu  
EXPNO 44  
PROCNO 1

F2 - Acquisition Parameters

Date\_ 20120511  
Time 18.17  
INSTRUM spect  
PROBHD 5 mm BBO BB-1H  
PULPROG zgpg30  
TD 32768  
SOLVENT CDCl3  
NS 136  
DS 0  
SWH 24038.461 Hz  
FIDRES 0.733596 Hz  
AQ 0.6816452 sec  
RG 32768  
DW 20.800 usec  
DE 6.50 usec  
TE 299.3 K  
D1 2.00000000 sec  
D11 0.03000000 sec  
TD0 1

===== CHANNEL f1 =====

NUC1 13C  
P1 8.90 usec  
PL1 7.00 dB  
SFO1 100.6233325 MHz

===== CHANNEL f2 =====

CPDPRG2 waltz16  
NUC2 1H  
PCPD2 90.00 usec  
PL2 3.80 dB  
PL12 21.60 dB  
PL13 24.60 dB  
SFO2 400.1316005 MHz

F2 - Processing parameters

SI 32768  
SF 100.6127513 MHz  
WDW EM  
SSB 0  
LB 1.00 Hz  
GB 0  
PC 1.00

<sup>1</sup>H N-Ethylindole-Starting material

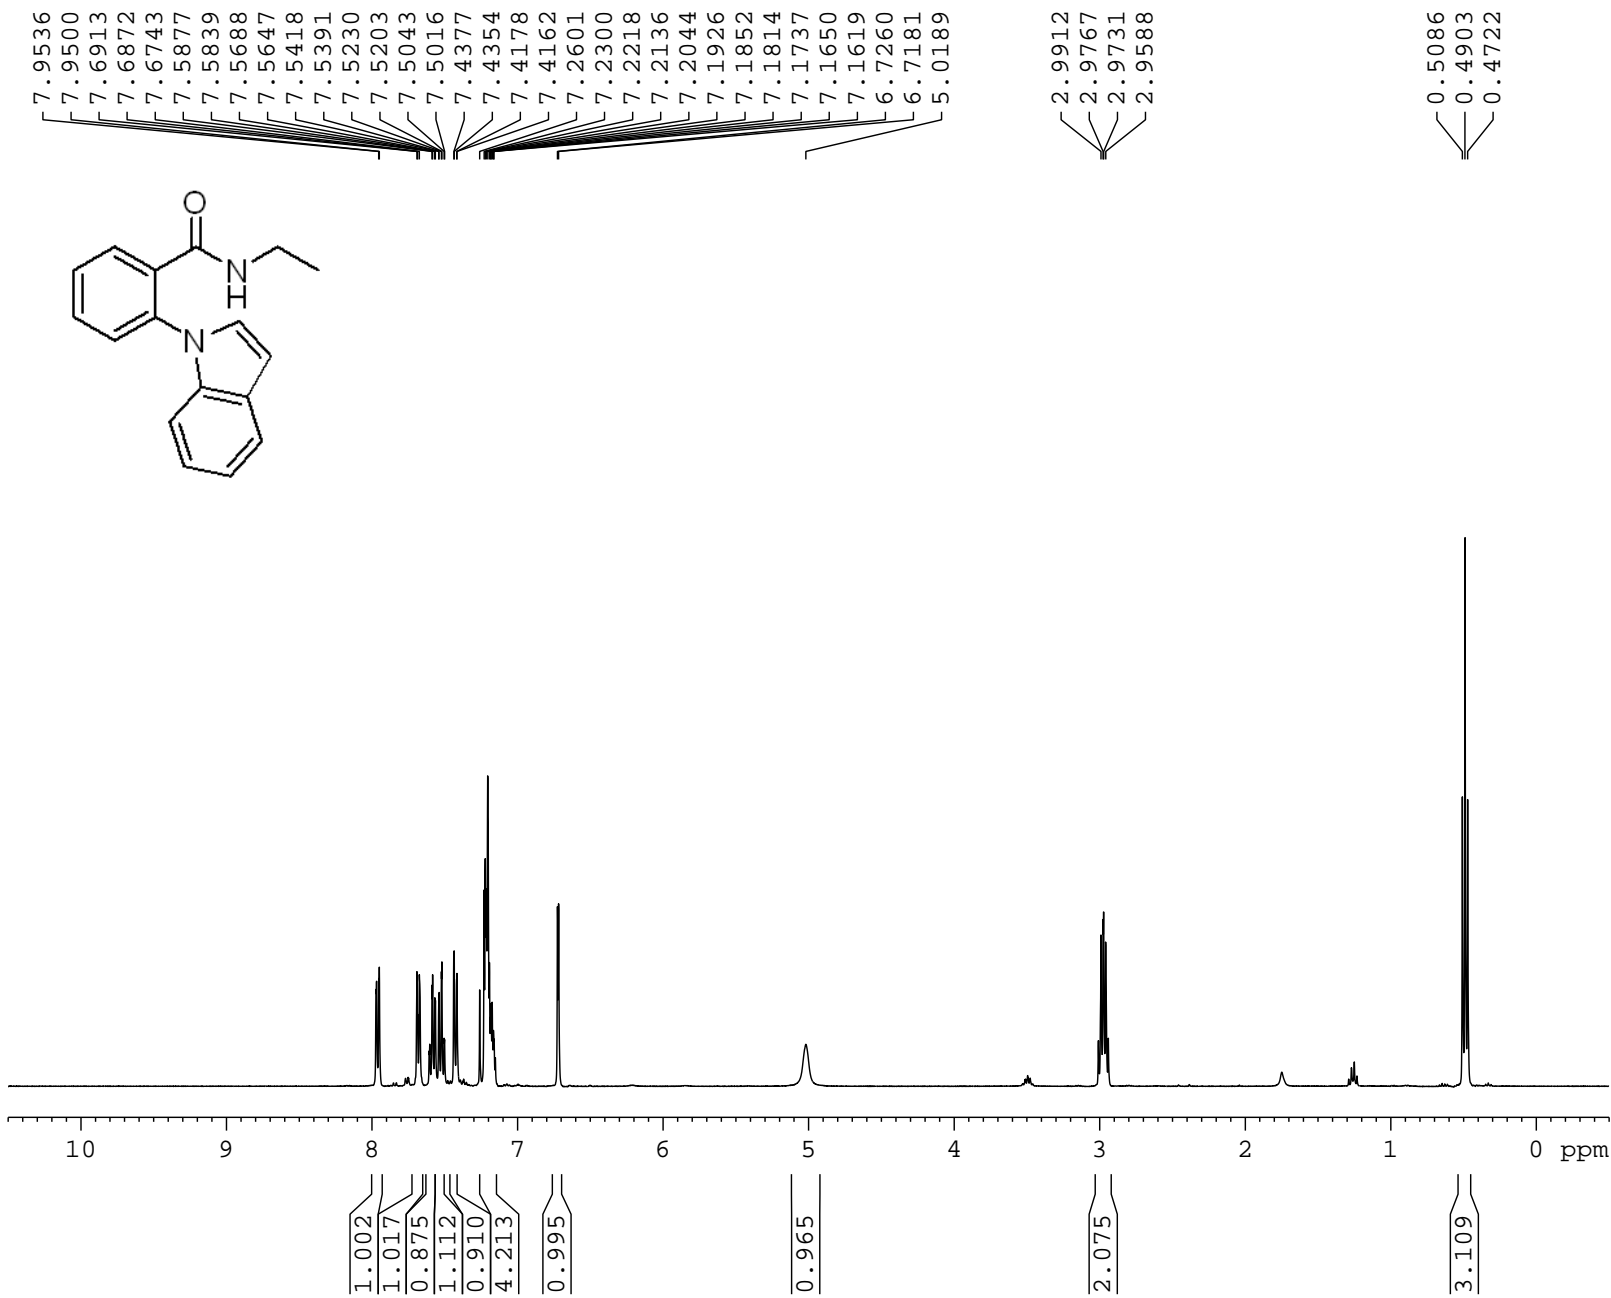

Current Data Parameters  
NAME Trimurthulu  
EXPNO 70  
PROCNO 1

F2 - Acquisition Parameters  
Date\_ 20120530  
Time 18.03  
INSTRUM spect  
PROBHD 5 mm BBO BB-1H  
PULPROG zg30  
TD 32768  
SOLVENT CDCl3  
NS 16  
DS 0  
SWH 7246.377 Hz  
FIDRES 0.221142 Hz  
AQ 2.2611110 sec  
RG 90.5  
DW 69.000 usec  
DE 6.50 usec  
TE 298.1 K  
D1 2.00000000 sec  
TD0 1

===== CHANNEL f1 =====  
NUC1 1H  
P1 11.70 usec  
PL1 4.00 dB  
SFO1 400.1324008 MHz

F2 - Processing parameters  
SI 16384  
SF 400.1300086 MHz  
WDW EM  
SSB 0  
LB 0 Hz  
GB 0  
PC 1.00

13C

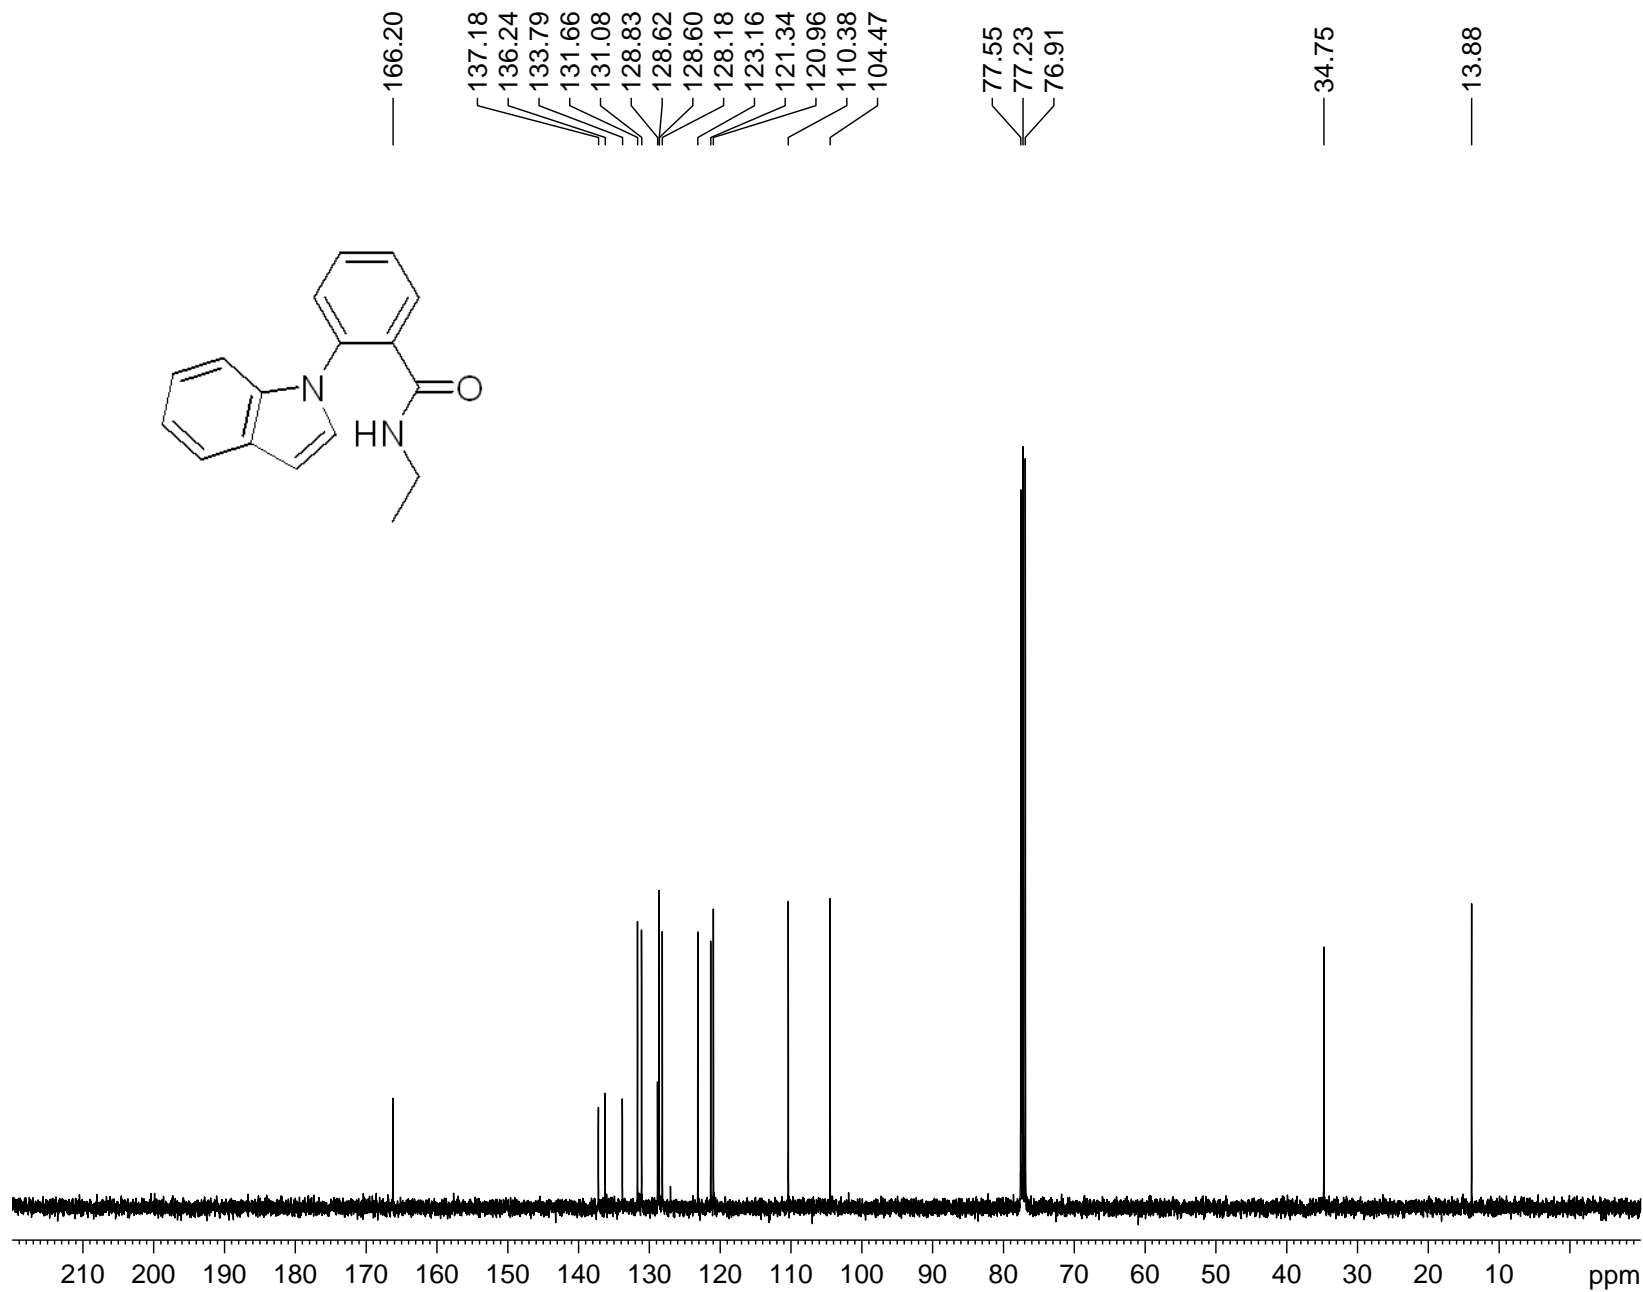

Current Data Parameters

NAME Trimurthulu  
EXPNO 71  
PROCNO 1

F2 - Acquisition Parameters

Date\_ 20120530  
Time 18.11  
INSTRUM spect  
PROBHD 5 mm BBO BB-1H  
PULPROG zgpg30  
TD 32768  
SOLVENT CDCl3  
NS 202  
DS 0  
SWH 24038.461 Hz  
FIDRES 0.733596 Hz  
AQ 0.6816452 sec  
RG 32768  
DW 20.800 usec  
DE 6.50 usec  
TE 298.6 K  
D1 2.00000000 sec  
D11 0.03000000 sec  
TD0 1

==== CHANNEL f1 =====

NUC1 13C  
P1 8.90 usec  
PL1 7.00 dB  
SFO1 100.6233325 MHz

==== CHANNEL f2 =====

CPDPRG2 waltz16  
NUC2 1H  
PCPD2 90.00 usec  
PL2 3.80 dB  
PL12 21.60 dB  
PL13 24.60 dB  
SFO2 400.1316005 MHz

F2 - Processing parameters

SI 32768  
SF 100.6127514 MHz  
WDW EM  
SSB 0  
LB 1.00 Hz  
GB 0  
PC 1.00



1H N-Benzyl starting material

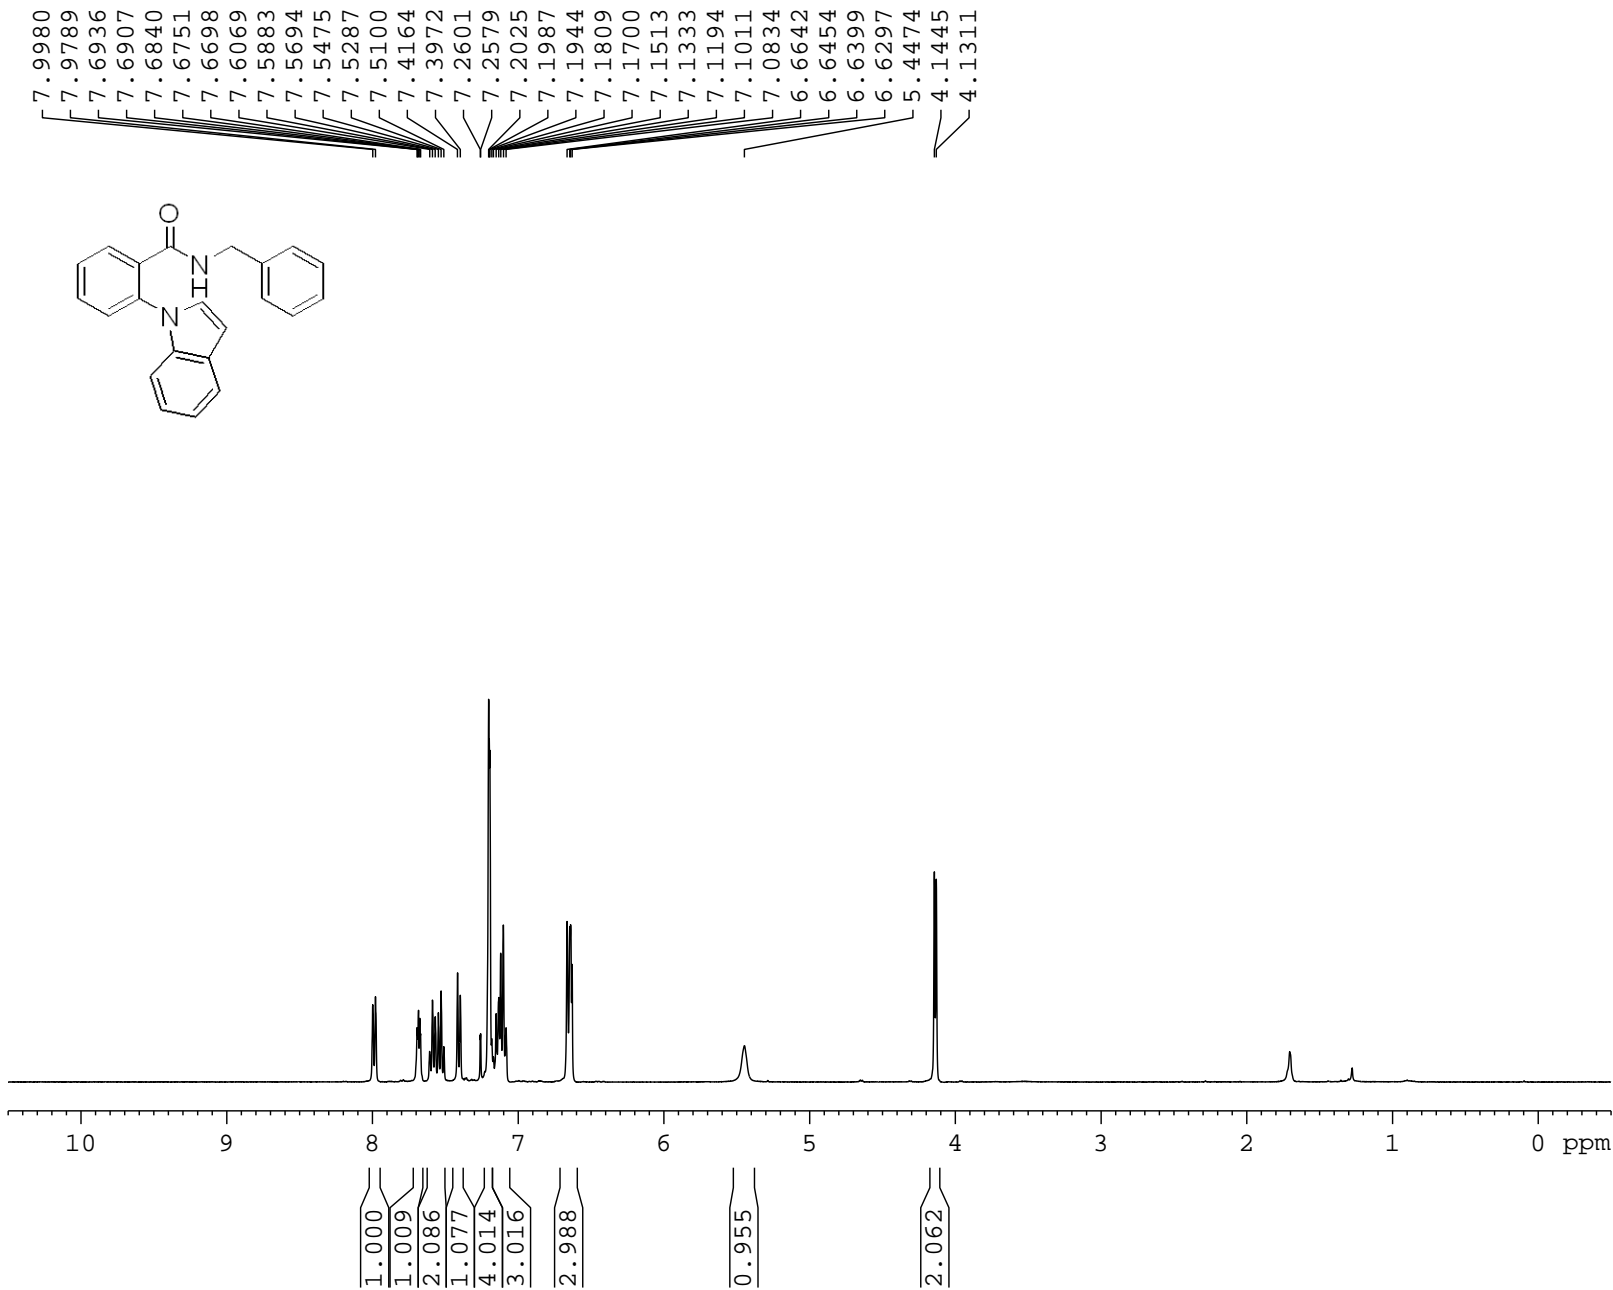

Current Data Parameters  
NAME Trimurthulu  
EXPNO 47  
PROCNO 1

F2 - Acquisition Parameters  
Date\_ 20120511  
Time 18.40  
INSTRUM spect  
PROBHD 5 mm BBO BB-1H  
PULPROG zg30  
TD 32768  
SOLVENT CDCl3  
NS 16  
DS 0  
SWH 7246.377 Hz  
FIDRES 0.221142 Hz  
AQ 2.2611110 sec  
RG 71.8  
DW 69.000 usec  
DE 6.50 usec  
TE 299.0 K  
D1 2.0000000 sec  
TD0 1

===== CHANNEL f1 =====  
NUC1 1H  
P1 11.70 usec  
PL1 4.00 dB  
SFO1 400.1324008 MHz

F2 - Processing parameters  
SI 16384  
SF 400.1300090 MHz  
WDW EM  
SSB 0  
LB 0 Hz  
GB 0  
PC 1.00

13C

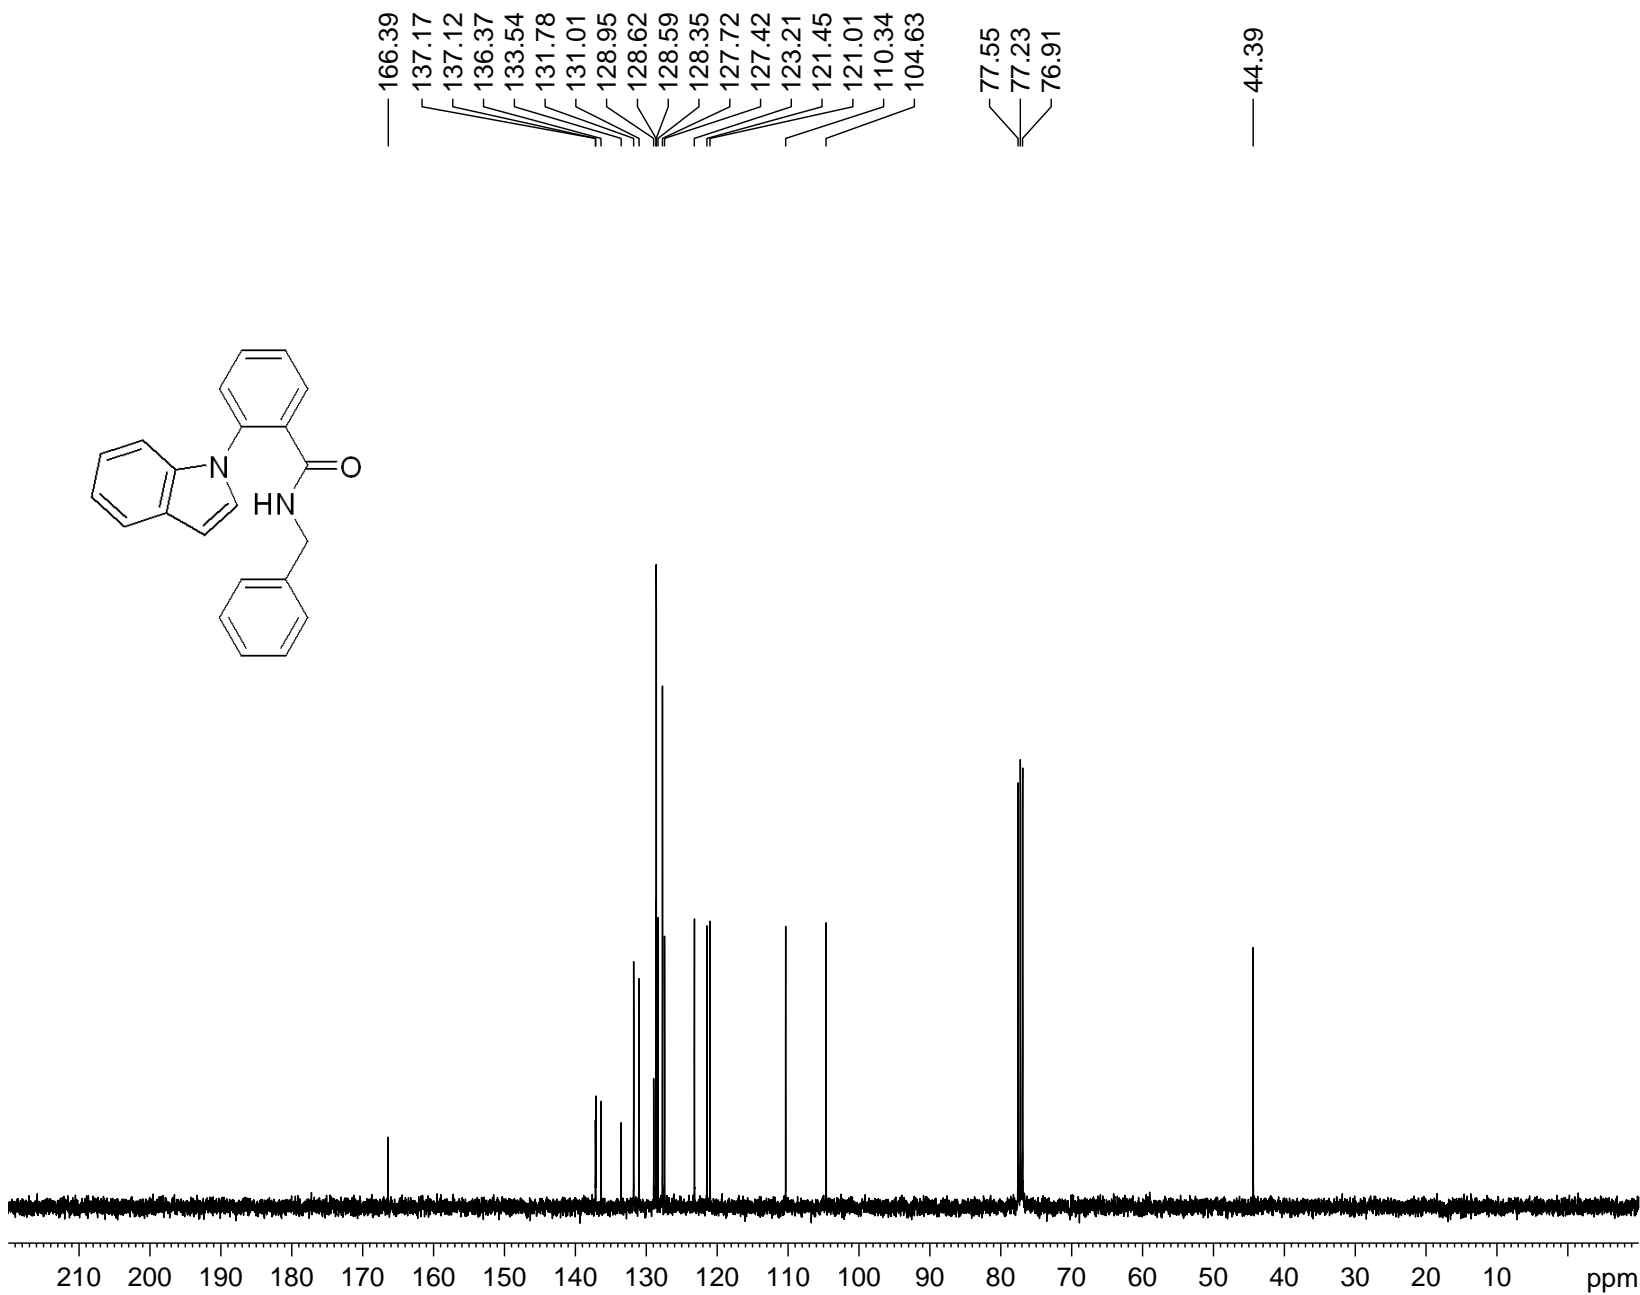

Current Data Parameters

NAME Trimurthulu  
EXPNO 48  
PROCNO 1

F2 - Acquisition Parameters

Date\_ 20120511  
Time 18.48  
INSTRUM spect  
PROBHD 5 mm BBO BB-1H  
PULPROG zgpg30  
TD 32768  
SOLVENT CDCl3  
NS 171  
DS 0  
SWH 24038.461 Hz  
FIDRES 0.733596 Hz  
AQ 0.6816452 sec  
RG 32768  
DW 20.800 usec  
DE 6.50 usec  
TE 299.6 K  
D1 2.00000000 sec  
D11 0.03000000 sec  
TD0 1

===== CHANNEL f1 =====

NUC1 13C  
P1 8.90 usec  
PL1 7.00 dB  
SFO1 100.6233325 MHz

===== CHANNEL f2 =====

CPDPRG2 waltz16  
NUC2 1H  
PCPD2 90.00 usec  
PL2 3.80 dB  
PL12 21.60 dB  
PL13 24.60 dB  
SFO2 400.1316005 MHz

F2 - Processing parameters

SI 32768  
SF 100.6127528 MHz  
WDW EM  
SSB 0  
LB 1.00 Hz  
GB 0  
PC 1.00

H spectrum of N-phenyl

7.7348  
7.7254  
7.7207  
7.6808  
7.6771  
7.6621  
7.6584  
7.6433  
7.6394  
7.6172  
7.6003  
7.5820  
7.5116  
7.4921  
7.2917  
7.2837  
7.2734  
7.2600  
7.2445  
7.2409  
7.2359  
7.2283  
7.2174  
7.2134  
7.2001  
7.1479  
7.1285  
7.1088  
7.0054  
6.9870  
6.9685  
6.8660  
6.8468  
6.7685  
6.7609

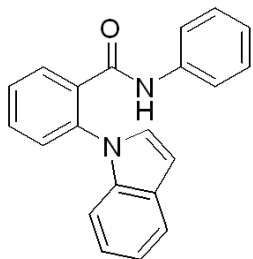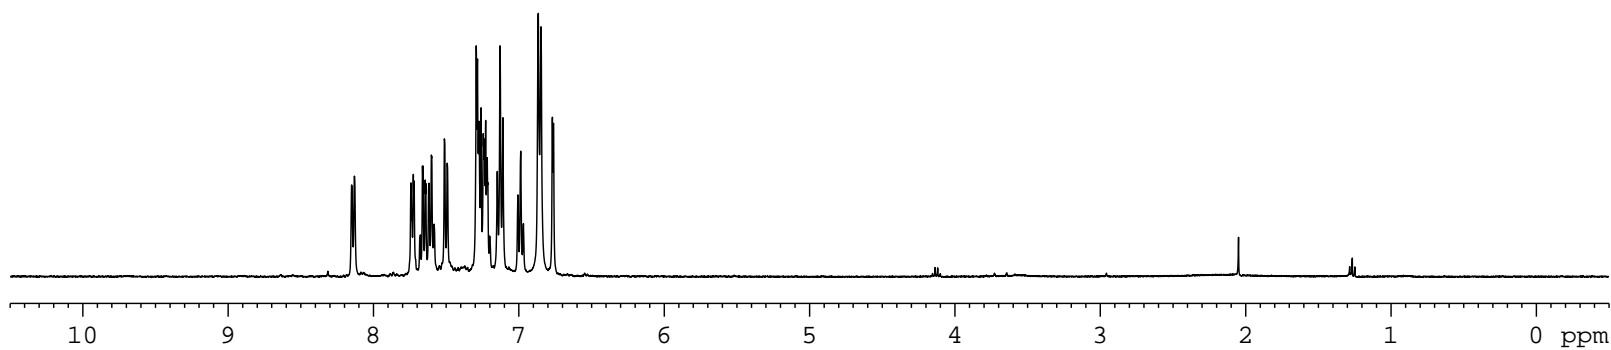

0.987  
0.992  
0.805  
1.022  
0.786  
2.178  
2.373  
1.631  
1.144  
3.003  
1.056

Current Data Parameters  
NAME kotl  
EXPNO 1  
PROCNO 1

F2 - Acquisition Parameters  
Date\_ 20120519  
Time 2.55  
INSTRUM spect  
PROBHD 5 mm BBO BB-1H  
PULPROG zg30  
TD 32768  
SOLVENT CDCl3  
NS 32  
DS 0  
SWH 7246.377 Hz  
FIDRES 0.221142 Hz  
AQ 2.2611110 sec  
RG 4  
DW 69.000 usec  
DE 6.50 usec  
TE 298.8 K  
D1 2.0000000 sec  
TD0 1

===== CHANNEL f1 =====  
NUC1 1H  
P1 11.70 usec  
PL1 4.00 dB  
SFO1 400.1324008 MHz

F2 - Processing parameters  
SI 16384  
SF 400.1300087 MHz  
WDW EM  
SSB 0  
LB 0 Hz  
GB 0  
PC 1.00

C spectrum of N-phenyl

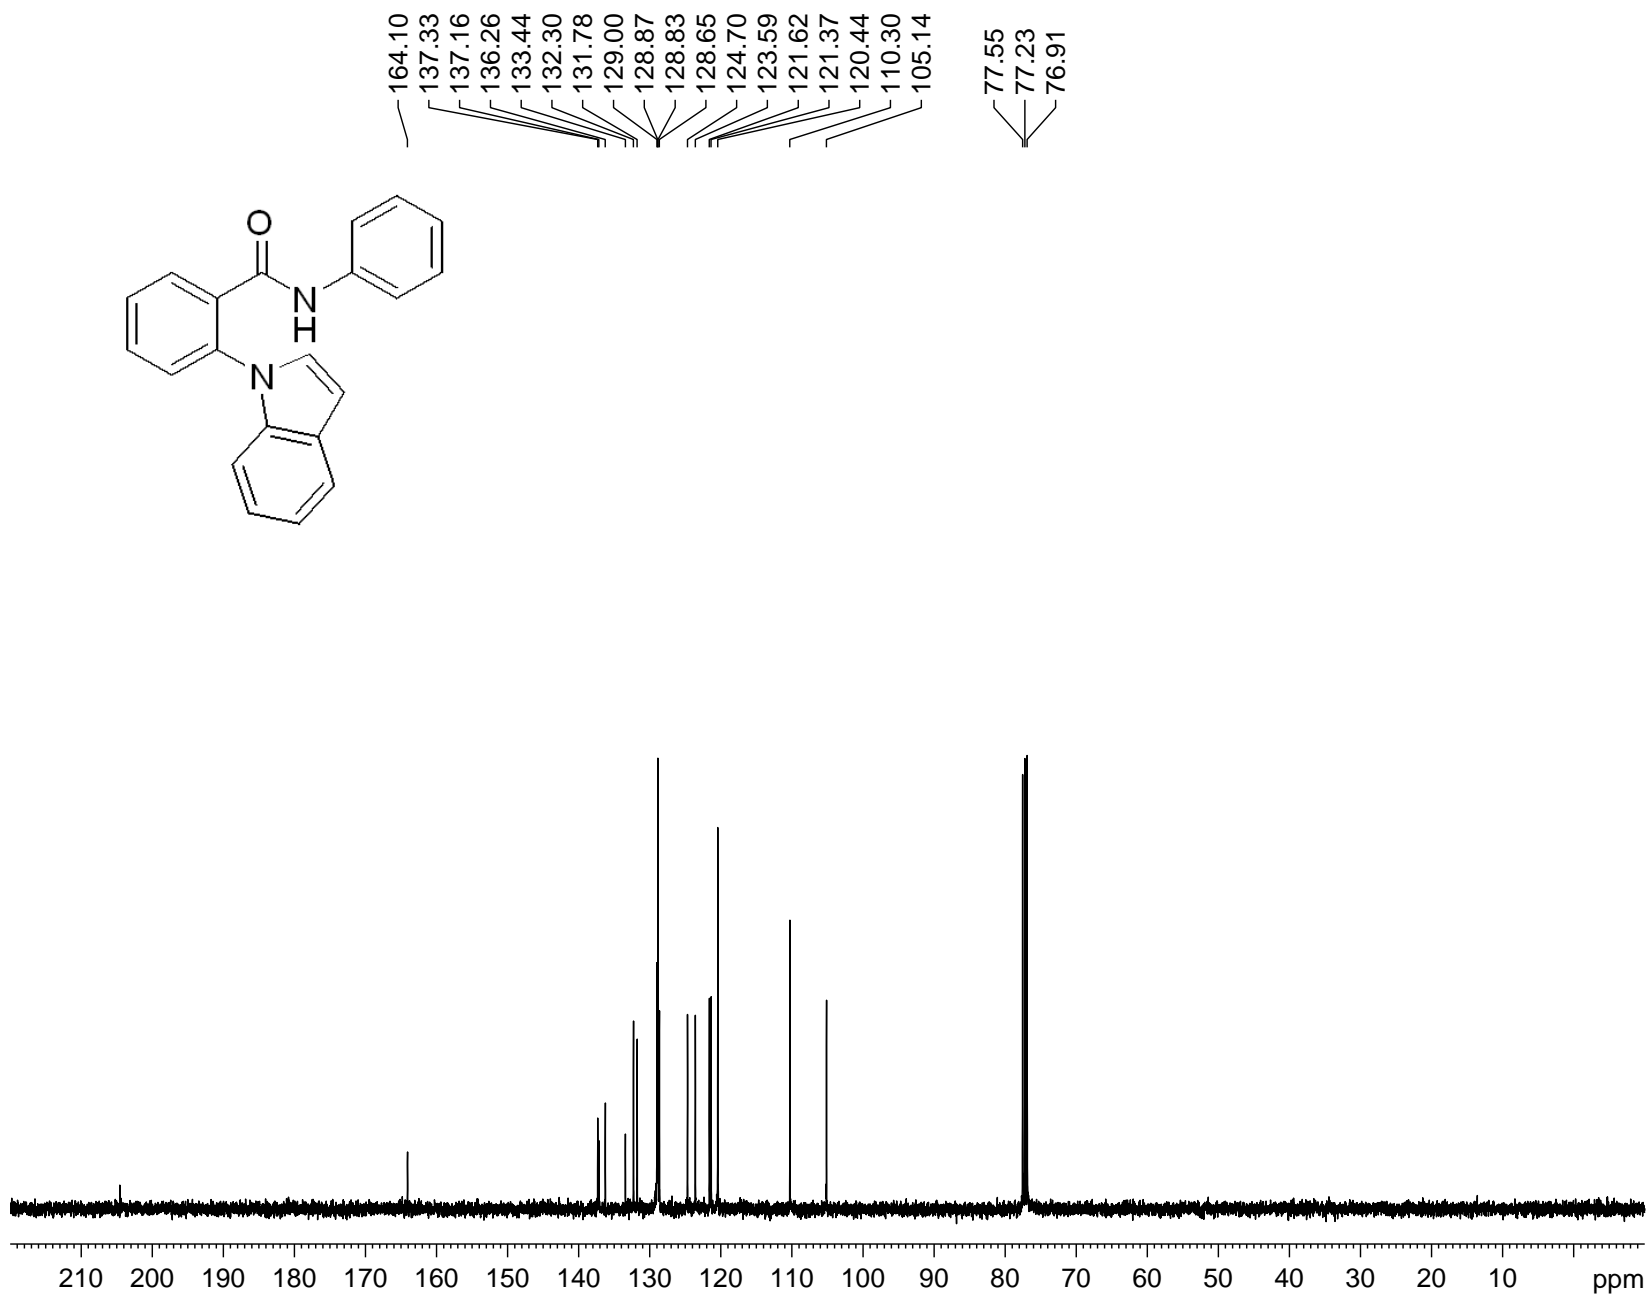

Current Data Parameters

NAME koti  
EXPNO 2  
PROCNO 1

F2 - Acquisition Parameters

Date\_ 20120519  
Time 3.05  
INSTRUM spect  
PROBHD 5 mm BBO BB-1H  
PULPROG zgpg30  
TD 32768  
SOLVENT CDCl3  
NS 500  
DS 0  
SWH 24038.461 Hz  
FIDRES 0.733596 Hz  
AQ 0.6816452 sec  
RG 8192  
DW 20.800 usec  
DE 6.50 usec  
TE 299.4 K  
D1 2.00000000 sec  
D11 0.03000000 sec  
TD0 1

===== CHANNEL f1 =====

NUC1 13C  
P1 8.90 usec  
PL1 7.00 dB  
SFO1 100.6233325 MHz

===== CHANNEL f2 =====

CPDPRG2 waltz16  
NUC2 1H  
PCPD2 90.00 usec  
PL2 3.80 dB  
PL12 21.60 dB  
PL13 24.60 dB  
SFO2 400.1316005 MHz

F2 - Processing parameters

SI 32768  
SF 100.6127499 MHz  
WDW EM  
SSB 0  
LB 1.00 Hz  
GB 0  
PC 1.00

H spectrum of N-methyl 2

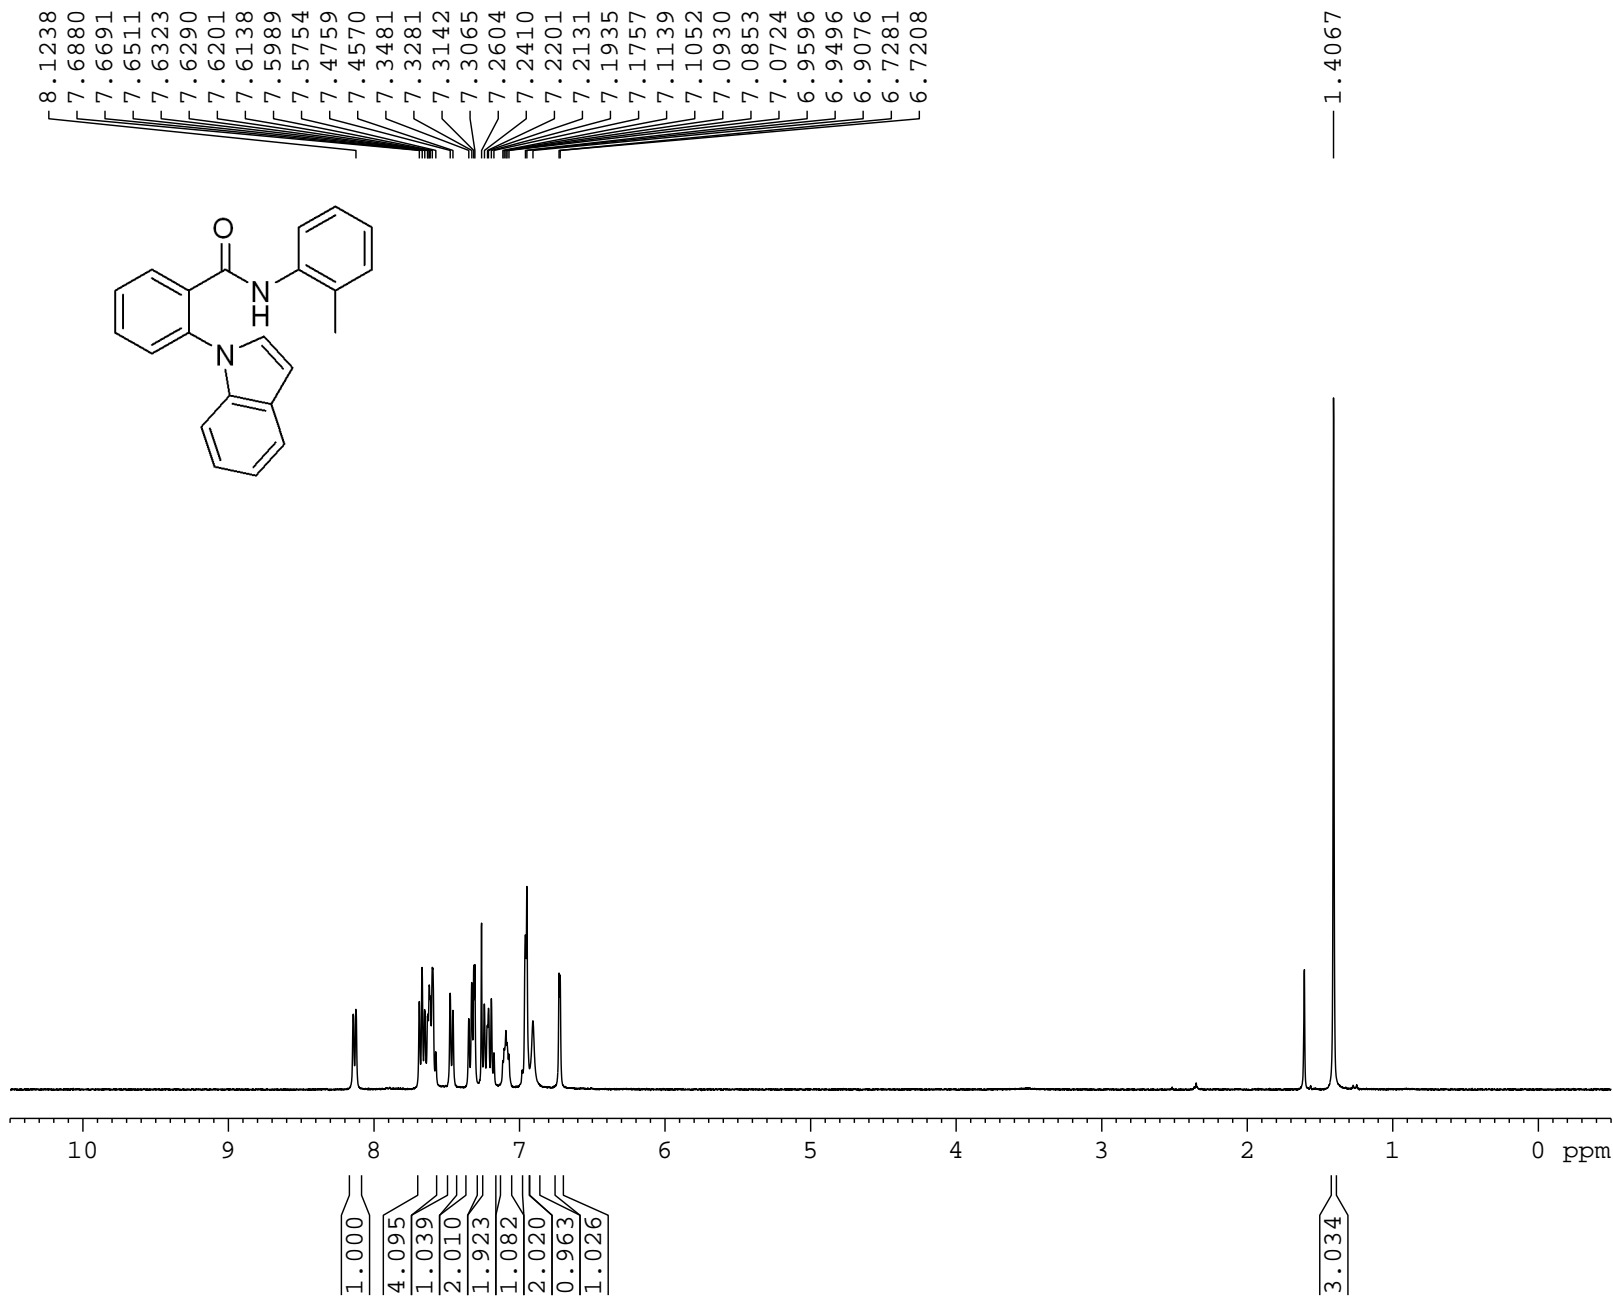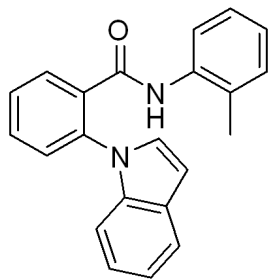

Current Data Parameters  
NAME koti  
EXPNO 12  
PROCNO 1

F2 - Acquisition Parameters  
Date\_ 20120601  
Time 18.43  
INSTRUM spect  
PROBHD 5 mm BBO BB-1H  
PULPROG zg30  
TD 32768  
SOLVENT CDCl3  
NS 16  
DS 0  
SWH 7246.377 Hz  
FIDRES 0.221142 Hz  
AQ 2.2611110 sec  
RG 4  
DW 69.000 usec  
DE 6.50 usec  
TE 298.7 K  
D1 2.00000000 sec  
TD0 1

===== CHANNEL f1 =====  
NUC1 1H  
P1 11.70 usec  
PL1 4.00 dB  
SFO1 400.1324008 MHz

F2 - Processing parameters  
SI 16384  
SF 400.1300083 MHz  
WDW EM  
SSB 0  
LB 0 Hz  
GB 0  
PC 1.00

C spectrum of N-methyl 2

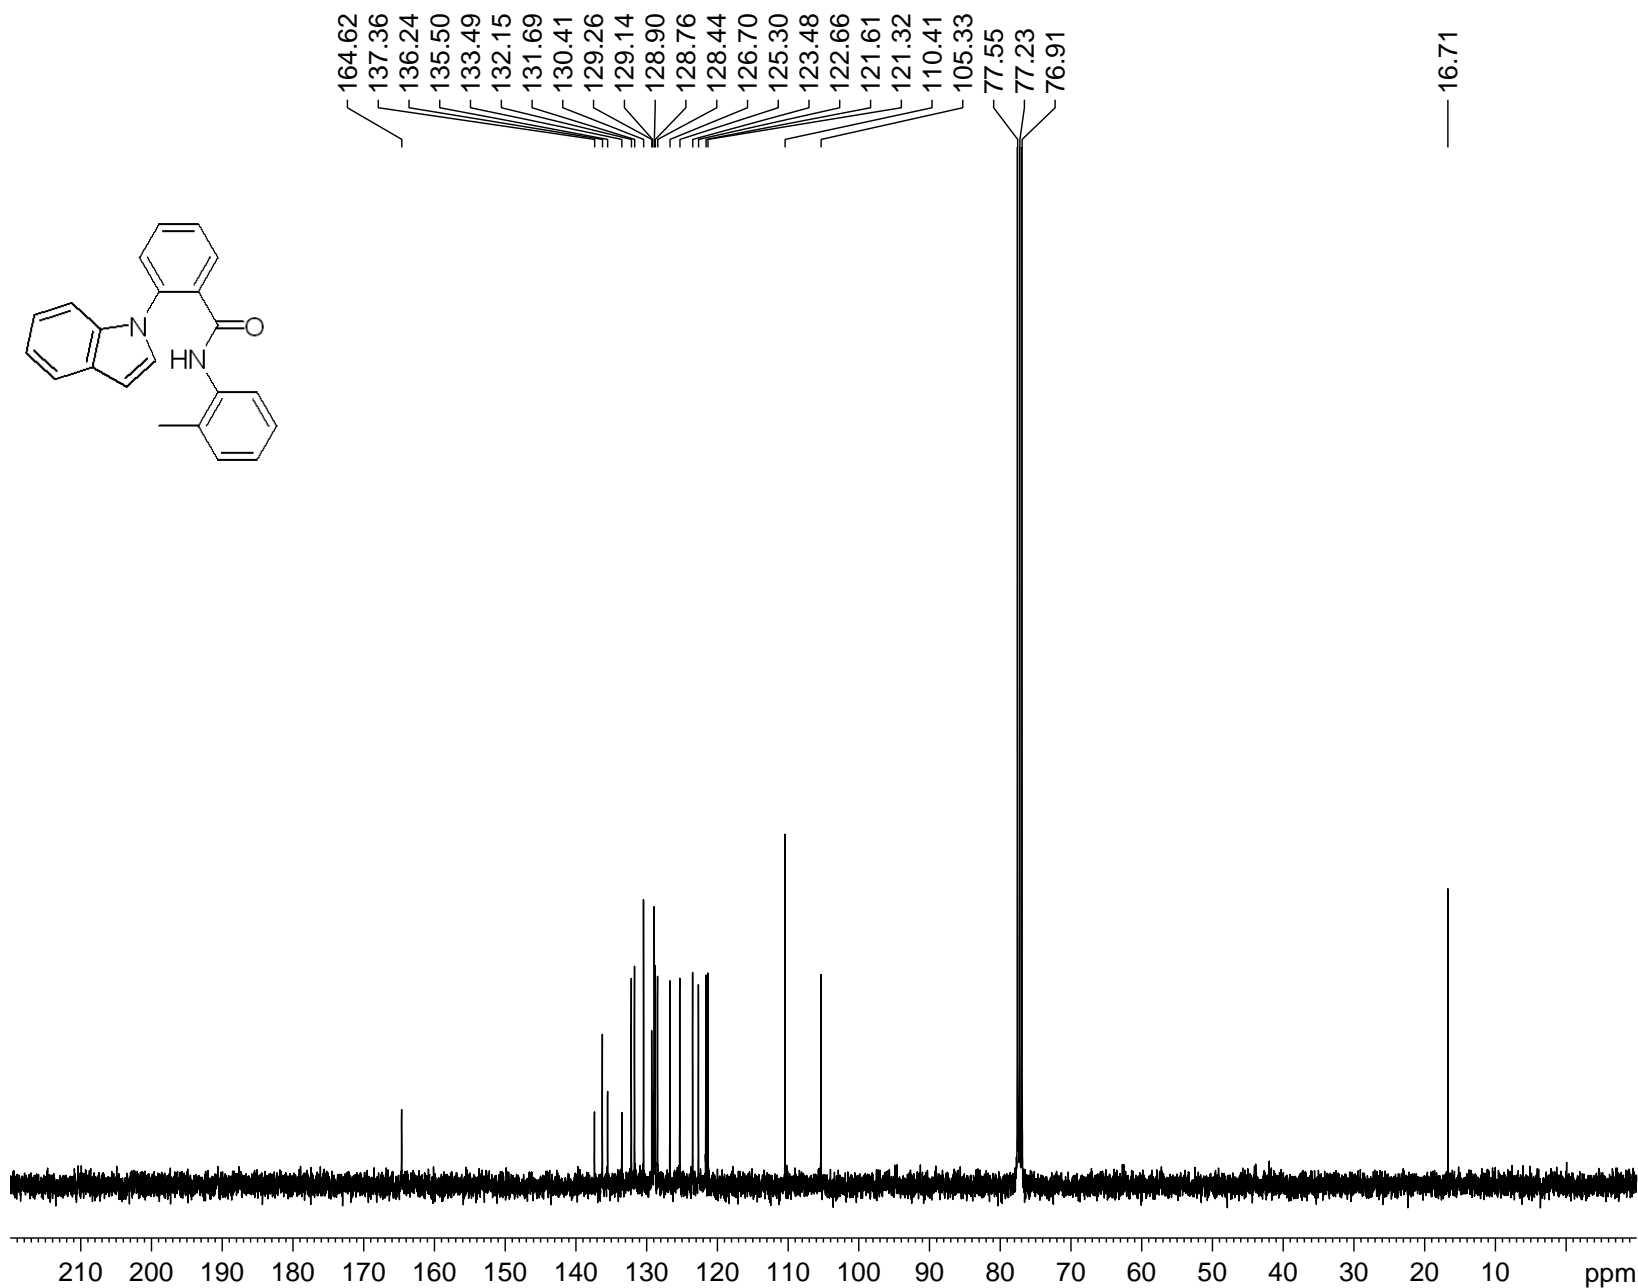

Current Data Parameters

NAME kotl  
EXPNO 13  
PROCNO 1

F2 - Acquisition Parameters

Date\_ 20120601  
Time 18.56  
INSTRUM spect  
PROBHD 5 mm BBO BB-1H  
PULPROG zgpg30  
TD 32768  
SOLVENT CDCl3  
NS 353  
DS 0  
SWH 24038.461 Hz  
FIDRES 0.733596 Hz  
AQ 0.6816452 sec  
RG 8192  
DW 20.800 usec  
DE 6.50 usec  
TE 299.4 K  
D1 2.00000000 sec  
D11 0.03000000 sec  
TD0 1

==== CHANNEL f1 =====

NUC1 13C  
P1 8.90 usec  
PL1 7.00 dB  
SFO1 100.6233325 MHz

==== CHANNEL f2 =====

CPDPRG2 waltz16  
NUC2 1H  
PCPD2 90.00 usec  
PL2 3.80 dB  
PL12 21.60 dB  
PL13 24.60 dB  
SFO2 400.1316005 MHz

F2 - Processing parameters

SI 32768  
SF 100.6127499 MHz  
WDW EM  
SSB 0  
LB 1.00 Hz  
GB 0  
PC 1.00

1H n,n-dimethyl-starting material

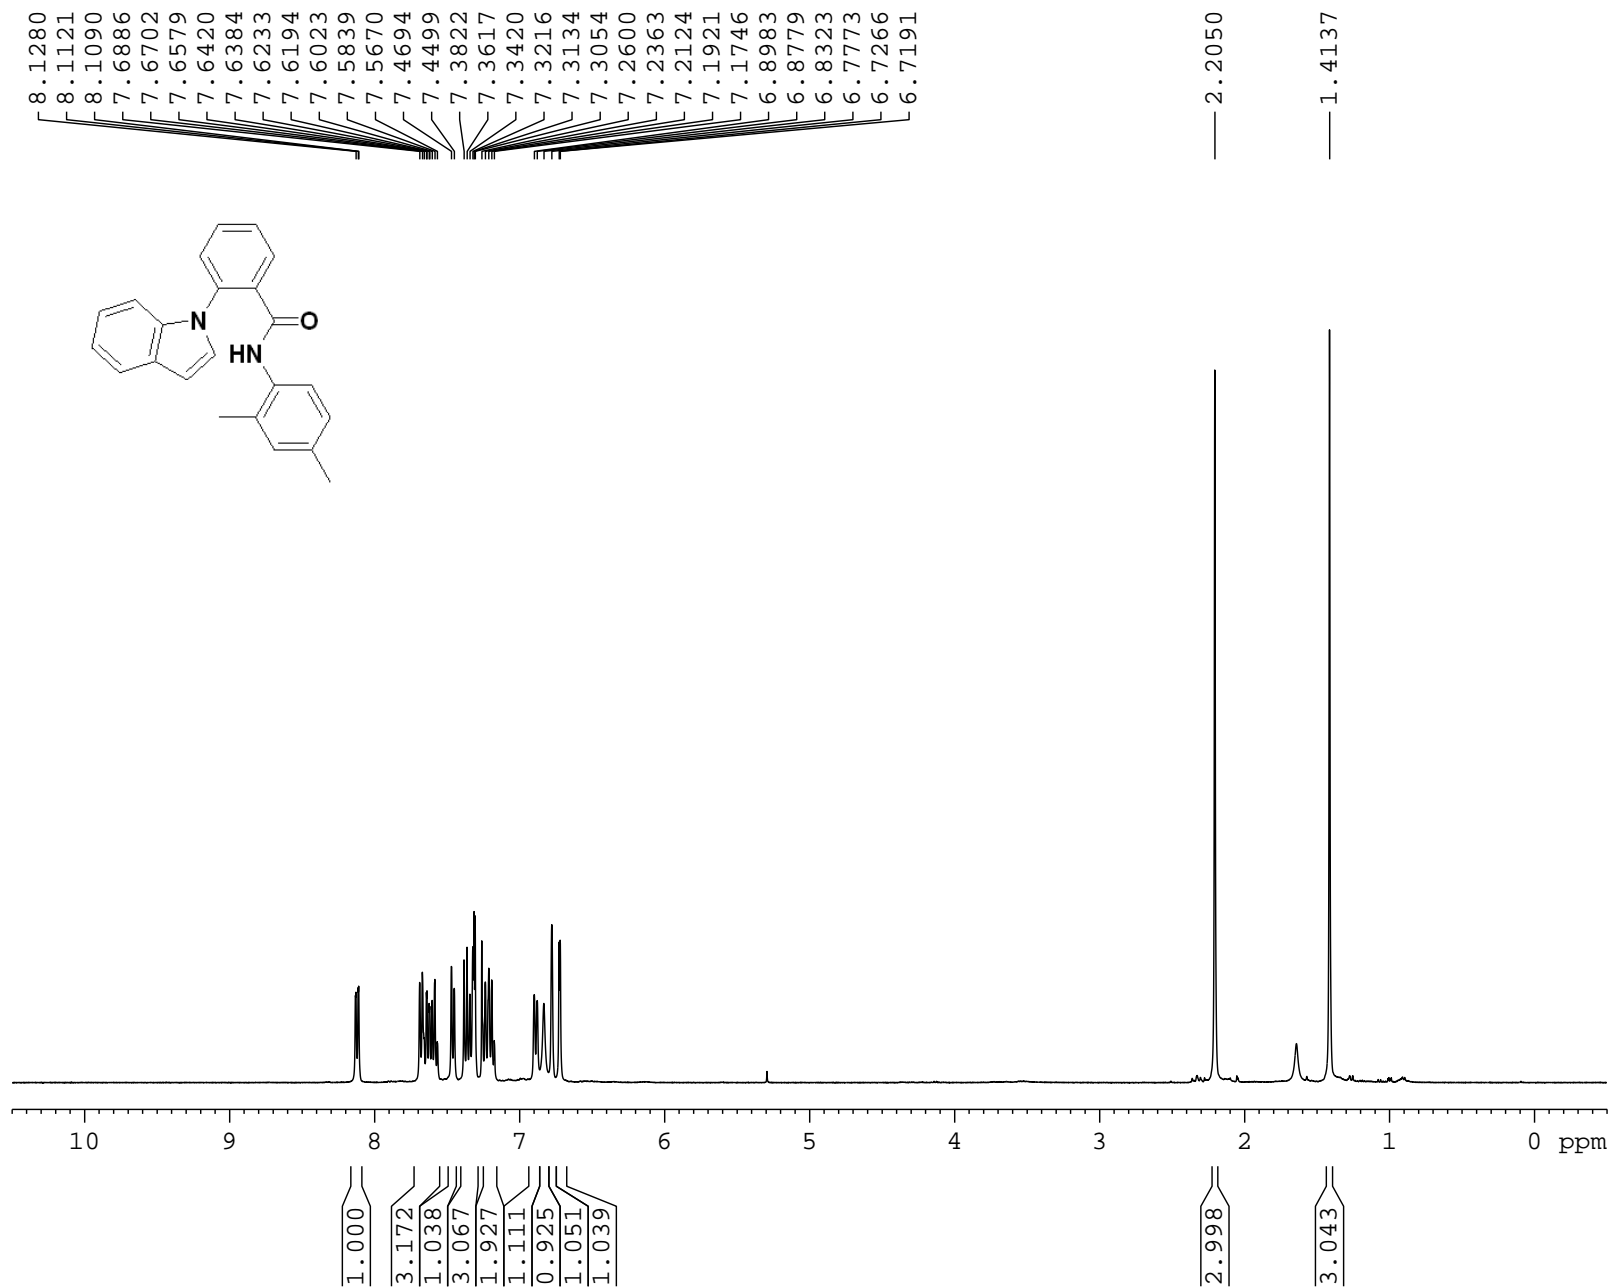

NAME Trimurthulu  
EXPNO 41  
PROCNO 1  
Date\_ 20120510  
Time 19.15  
INSTRUM spect  
PROBHD 5 mm BBO BB-1H  
PULPROG zg30  
TD 32768  
SOLVENT CDCl3  
NS 16  
DS 0  
SWH 7246.377 Hz  
FIDRES 0.221142 Hz  
AQ 2.2611110 sec  
RG 90.5  
DW 69.000 usec  
DE 6.50 usec  
TE 299.2 K  
D1 2.0000000 sec  
TD0 1

===== CHANNEL f1 =====  
NUC1 1H  
P1 11.70 usec  
PL1 4.00 dB  
SFO1 400.1324008 MHz  
SI 16384  
SF 400.1300087 MHz  
WDW EM  
SSB 0  
LB 0.00 Hz  
GB 0  
PC 1.00

13C

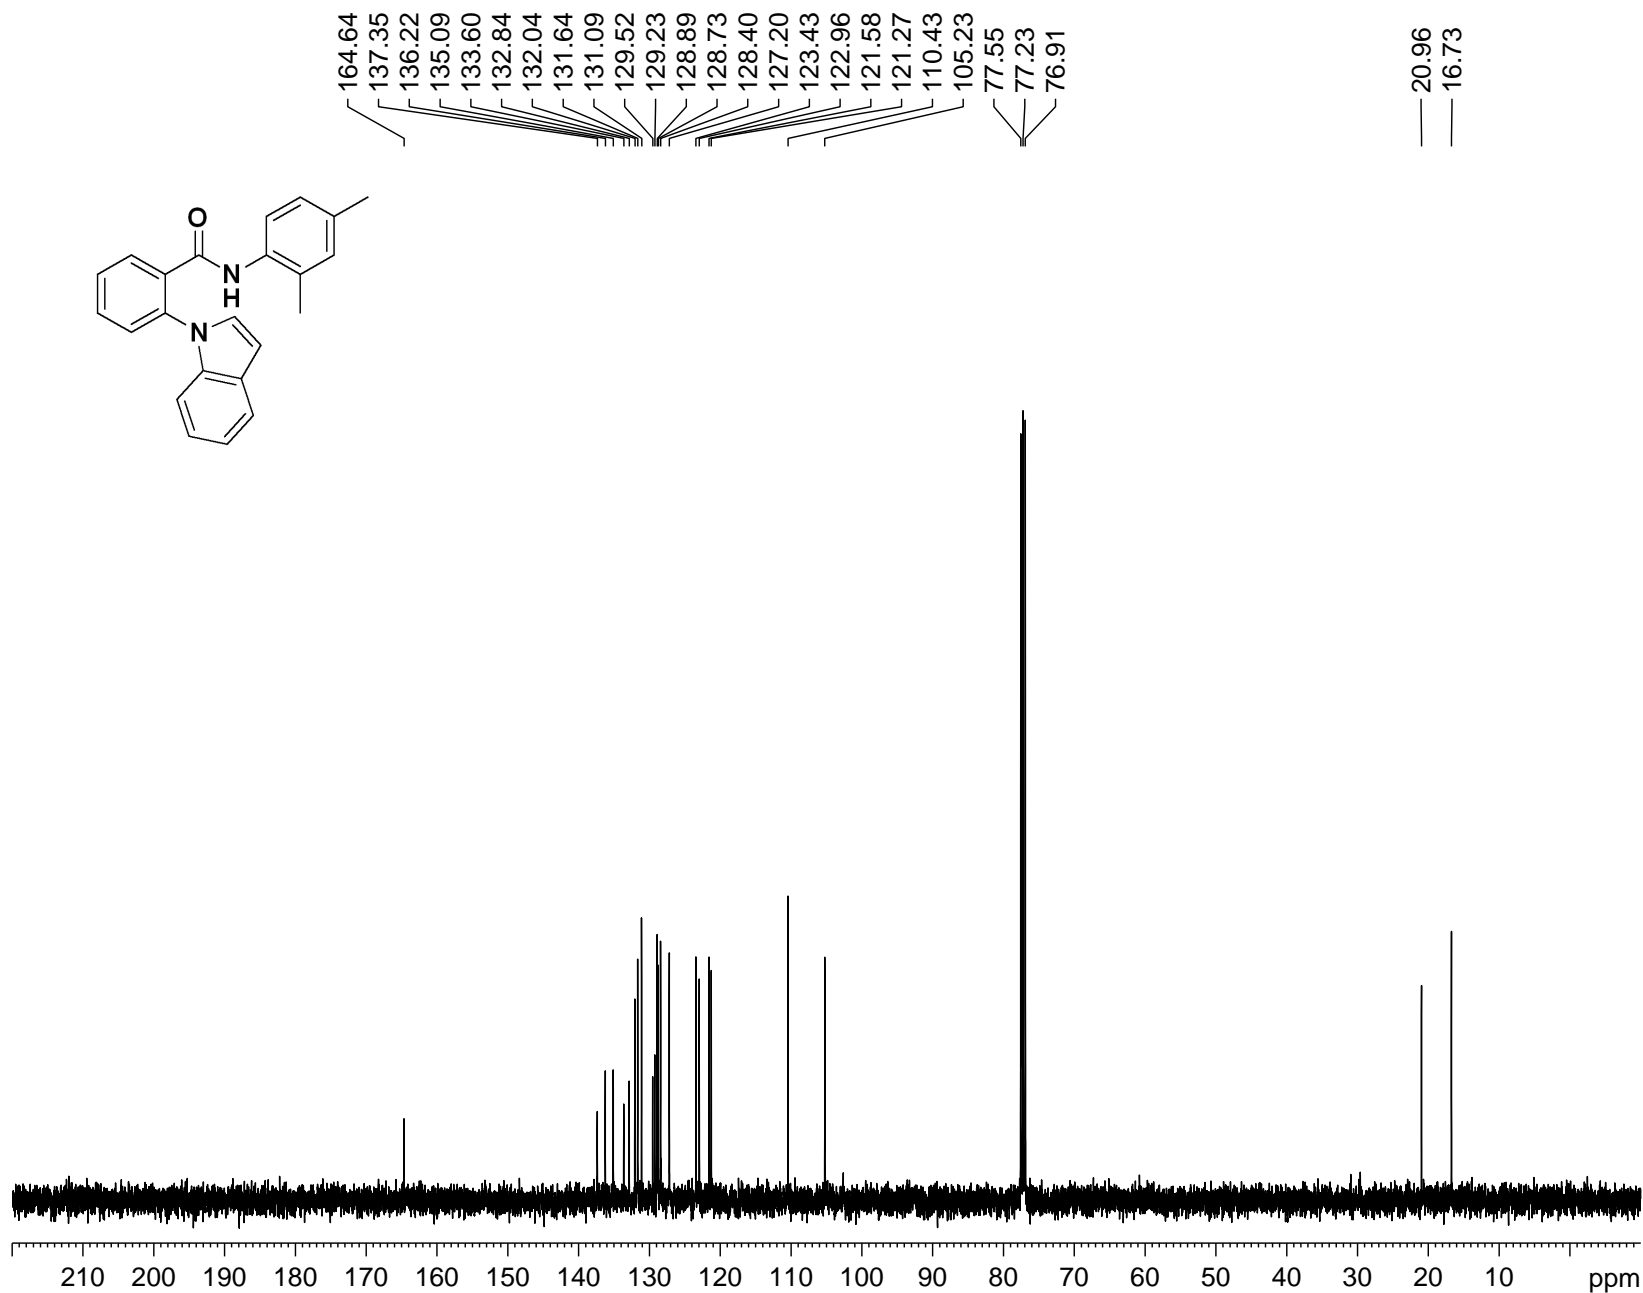

Current Data Parameters

NAME Trimurthulu  
EXPNO 42  
PROCNO 1

F2 - Acquisition Parameters

Date\_ 20120510  
Time 19.23  
INSTRUM spect  
PROBHD 5 mm BBO BB-1H  
PULPROG zgpg30  
TD 32768  
SOLVENT CDCl3  
NS 165  
DS 0  
SWH 24038.461 Hz  
FIDRES 0.733596 Hz  
AQ 0.6816452 sec  
RG 32768  
DW 20.800 usec  
DE 6.50 usec  
TE 299.7 K  
D1 2.00000000 sec  
D11 0.03000000 sec  
TD0 1

===== CHANNEL f1 =====

NUC1 13C  
P1 8.90 usec  
PL1 7.00 dB  
SFO1 100.6233325 MHz

===== CHANNEL f2 =====

CPDPRG2 waltz16  
NUC2 1H  
PCPD2 90.00 usec  
PL2 3.80 dB  
PL12 21.60 dB  
PL13 24.60 dB  
SFO2 400.1316005 MHz

F2 - Processing parameters

SI 32768  
SF 100.6127507 MHz  
WDW EM  
SSB 0  
LB 1.00 Hz  
GB 0  
PC 1.00



<sup>1</sup>H of 4-Ome-N- (SM)

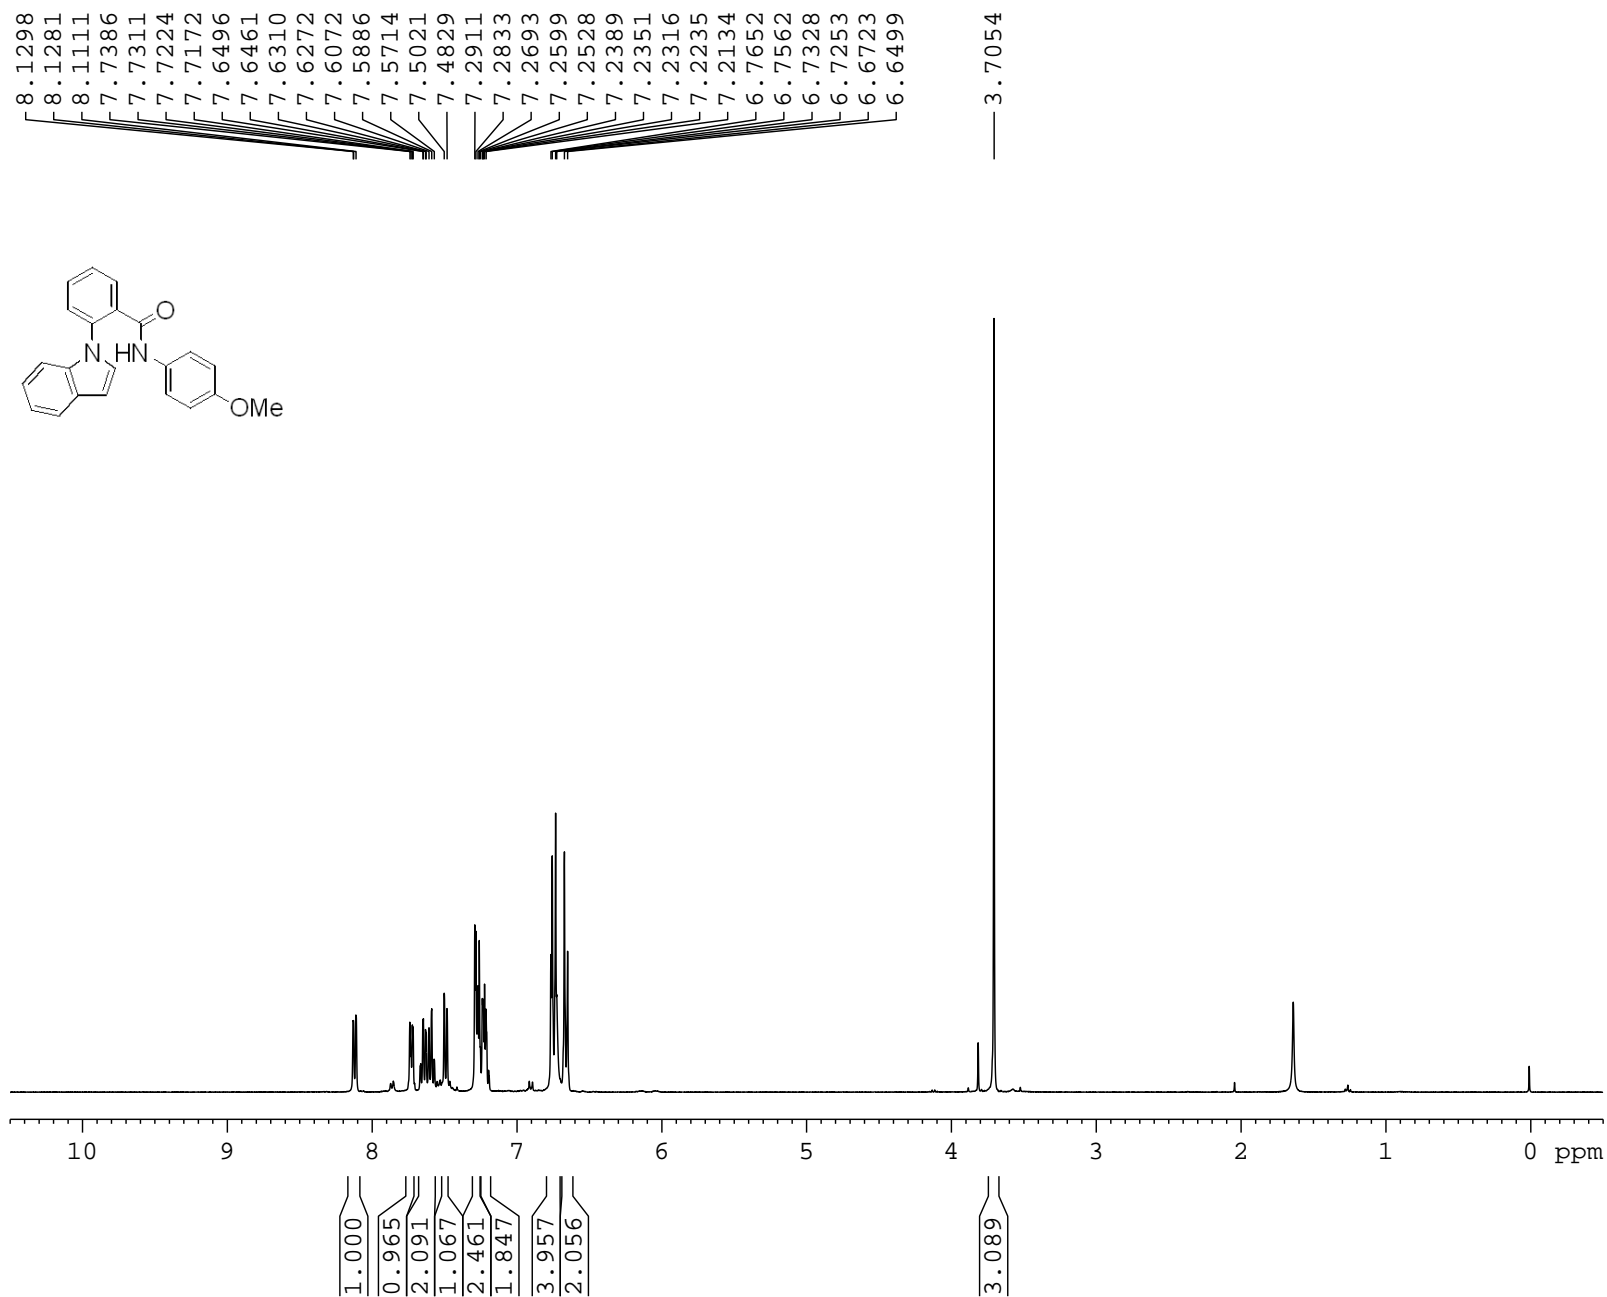

Current Data Parameters  
NAME Trimurthulu  
EXPNO 155  
PROCNO 1

F2 - Acquisition Parameters  
Date\_ 20120915  
Time 19.05  
INSTRUM spect  
PROBHD 5 mm BBO BB-1H  
PULPROG zg30  
TD 32768  
SOLVENT CDCl3  
NS 16  
DS 0  
SWH 7246.377 Hz  
FIDRES 0.221142 Hz  
AQ 2.2611110 sec  
RG 128  
DW 69.000 usec  
DE 6.50 usec  
TE 299.2 K  
D1 2.0000000 sec  
TD0 1

===== CHANNEL f1 =====  
NUC1 1H  
P1 11.70 usec  
PL1 4.00 dB  
SFO1 400.1324008 MHz

F2 - Processing parameters  
SI 16384  
SF 400.1300087 MHz  
WDW EM  
SSB 0  
LB 0 Hz  
GB 0  
PC 1.00

13C

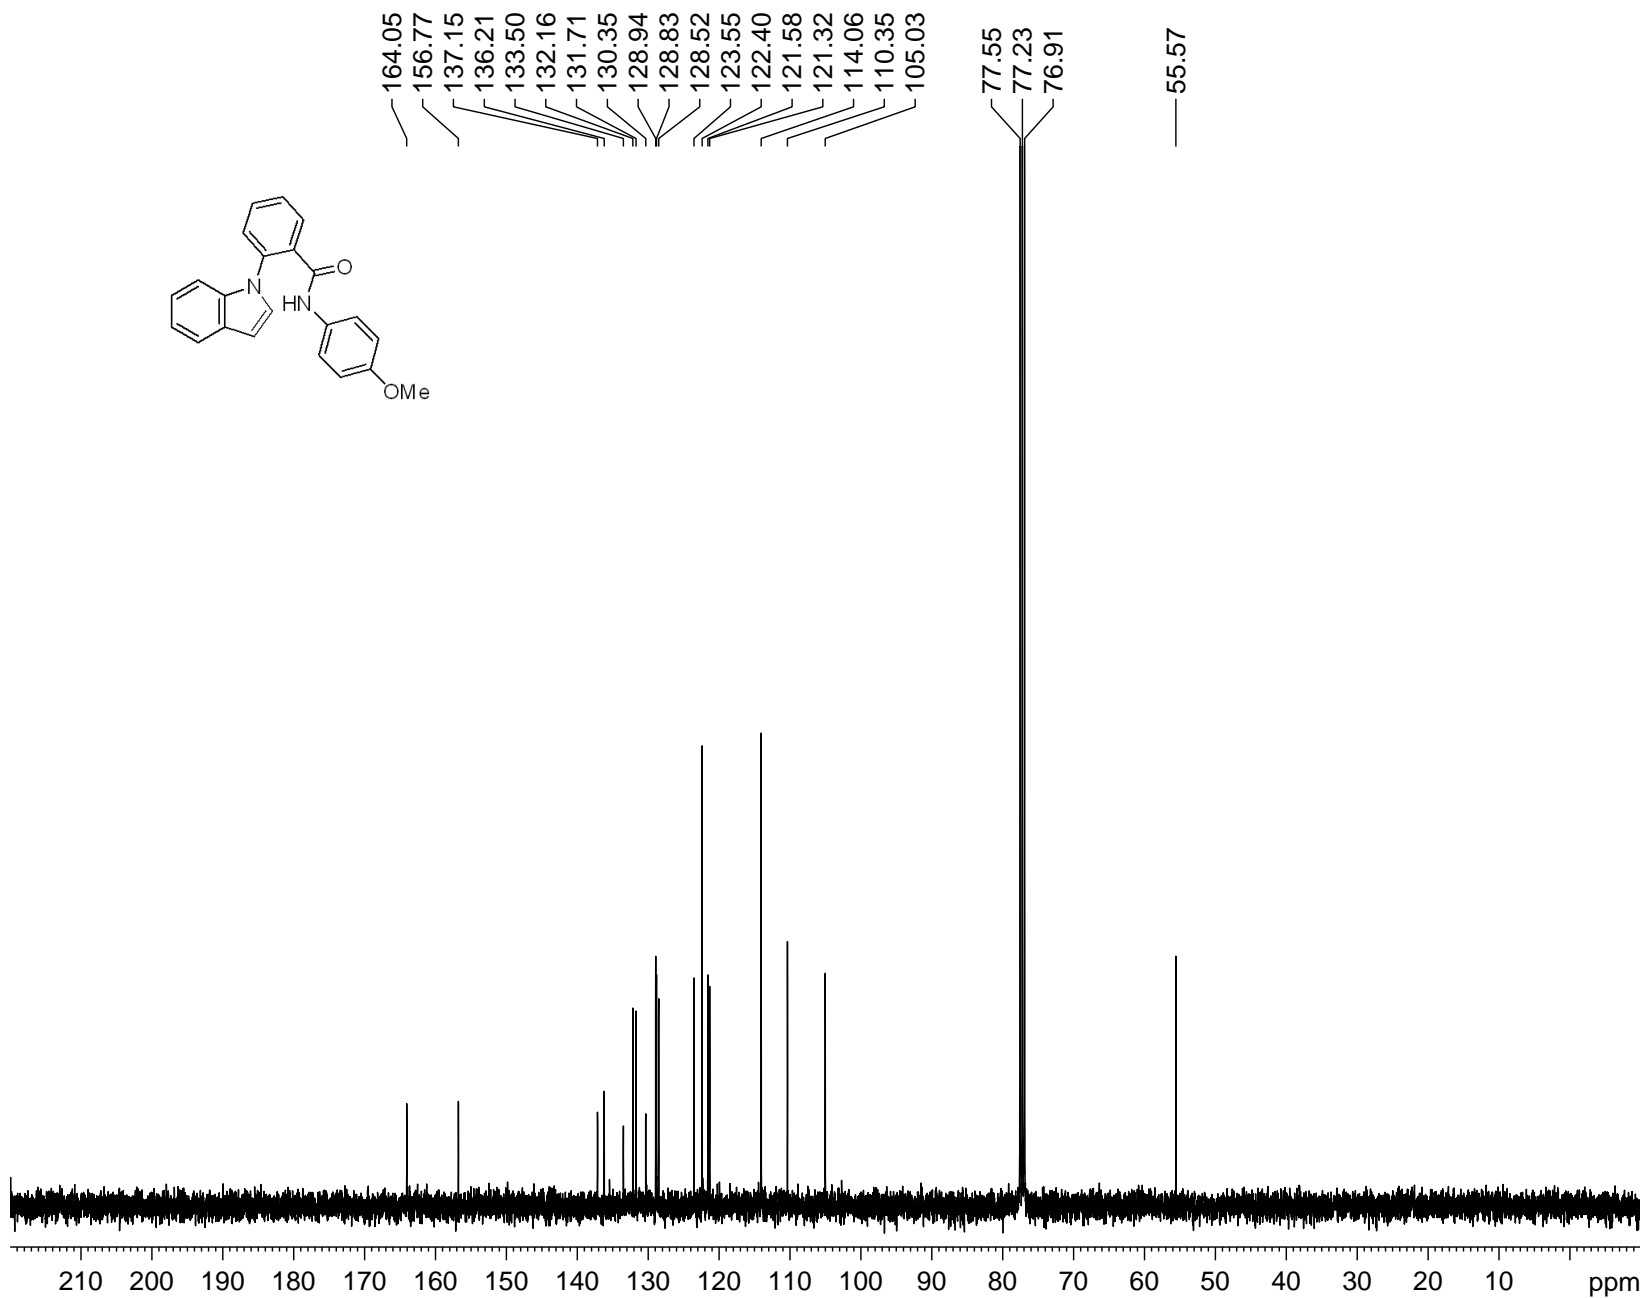

Current Data Parameters

NAME Trimurthulu  
EXPNO 156  
PROCNO 1

F2 - Acquisition Parameters

Date\_ 20120915  
Time 19.07  
INSTRUM spect  
PROBHD 5 mm BBO BB-1H  
PULPROG zgpg30  
TD 32768  
SOLVENT CDCl3  
NS 143  
DS 0  
SWH 24038.461 Hz  
FIDRES 0.733596 Hz  
AQ 0.6816452 sec  
RG 32768  
DW 20.800 usec  
DE 6.50 usec  
TE 299.2 K  
D1 2.0000000 sec  
D11 0.0300000 sec  
TD0 1

===== CHANNEL f1 =====

NUC1 13C  
P1 8.90 usec  
PL1 7.00 dB  
SFO1 100.6233325 MHz

===== CHANNEL f2 =====

CPDPRG2 waltz16  
NUC2 1H  
PCPD2 90.00 usec  
PL2 3.80 dB  
PL12 21.60 dB  
PL13 24.60 dB  
SFO2 400.1316005 MHz

F2 - Processing parameters

SI 32768  
SF 100.6127499 MHz  
WDW EM  
SSB 0  
LB 1.00 Hz  
GB 0  
PC 1.00

<sup>1</sup>H of 2-indole-Ph-NH-C=O-CH<sub>2</sub>-(Ph)<sub>2</sub> (SM)

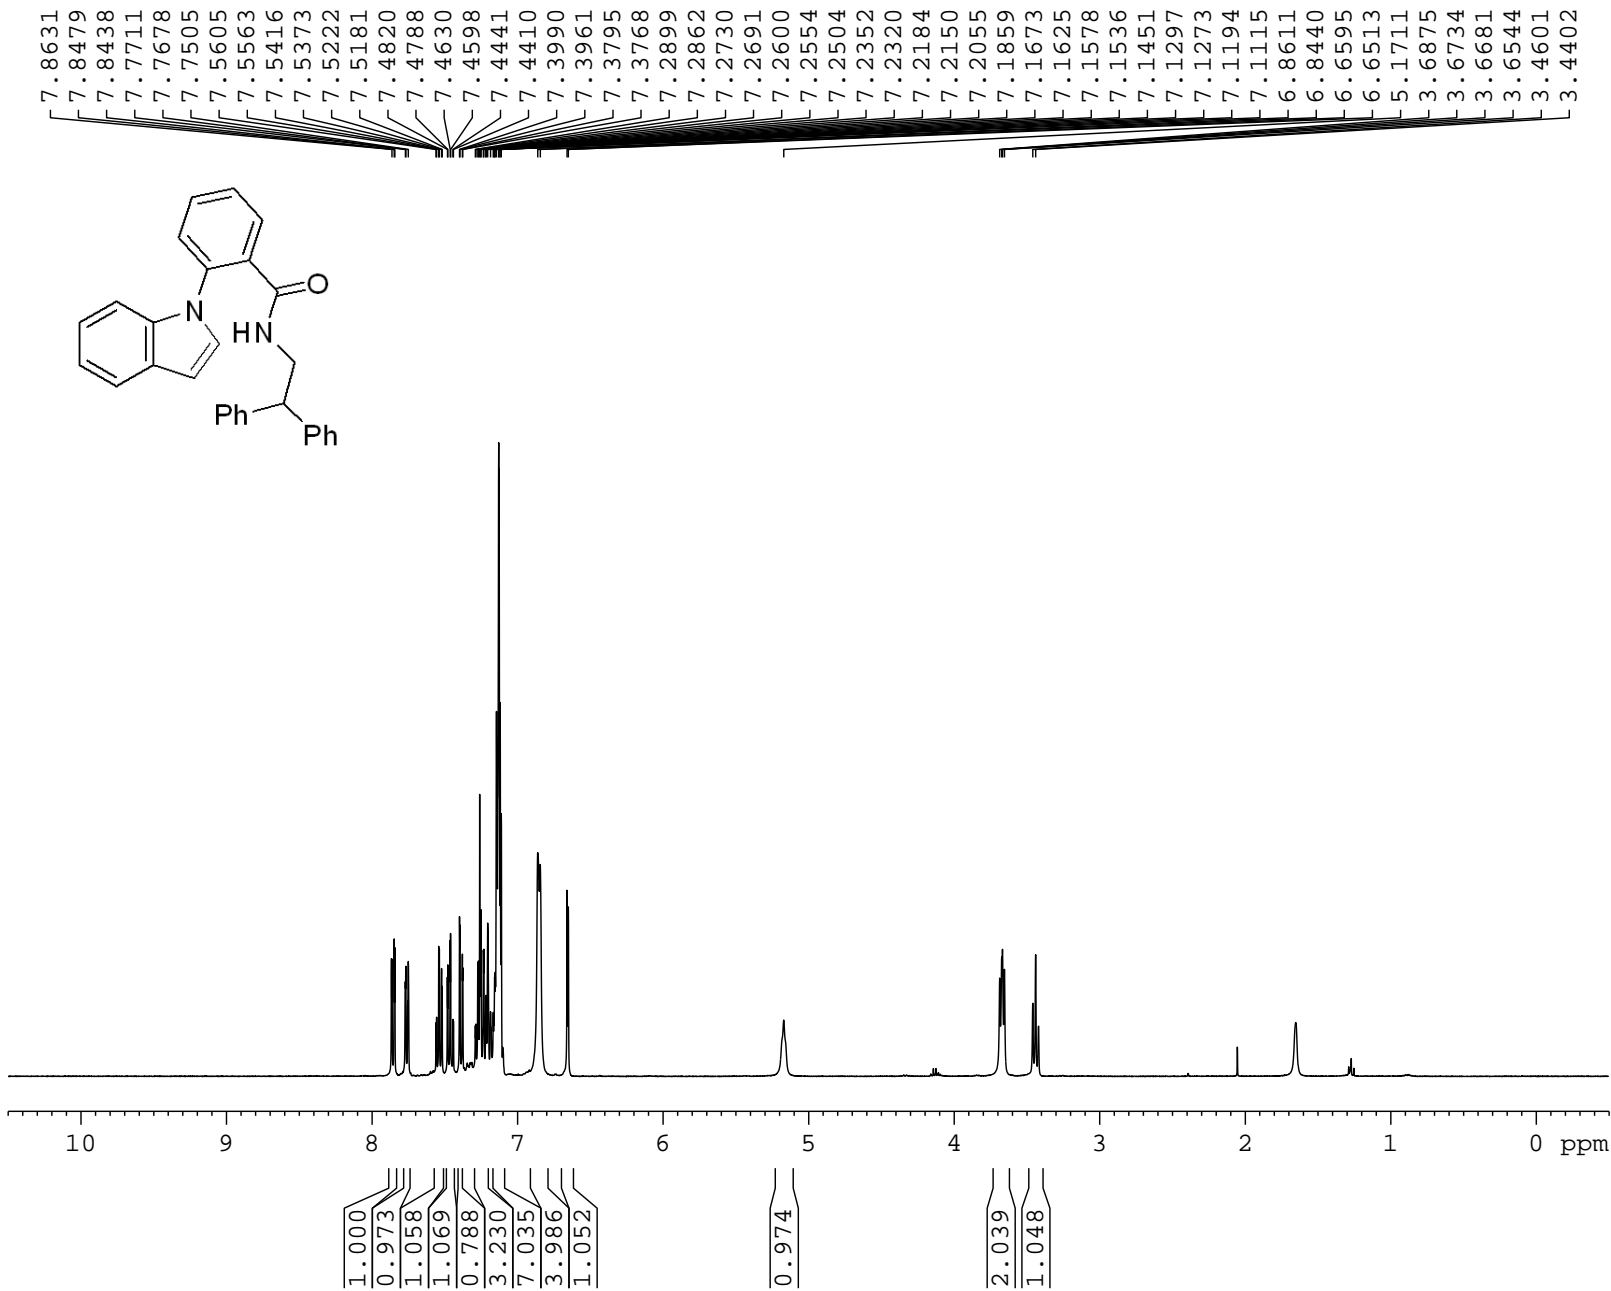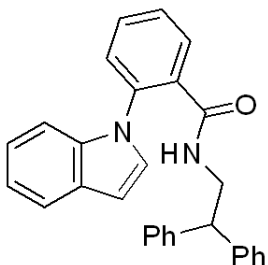

Current Data Parameters  
NAME Trimurthulu  
EXPNO 170  
PROCNO 1

F2 - Acquisition Parameters  
Date\_ 20121005  
Time 18.46  
INSTRUM spect  
PROBHD 5 mm BBO BB-1H  
PULPROG zg30  
TD 32768  
SOLVENT CDCl3  
NS 16  
DS 0  
SWH 7246.377 Hz  
FIDRES 0.221142 Hz  
AQ 2.2611110 sec  
RG 114  
DW 69.000 usec  
DE 6.50 usec  
TE 299.3 K  
D1 2.00000000 sec  
TD0 1

===== CHANNEL f1 =====  
NUC1 1H  
P1 11.90 usec  
PL1 3.00 dB  
SFO1 400.1324008 MHz

F2 - Processing parameters  
SI 16384  
SF 400.1300091 MHz  
WDW EM  
SSB 0  
LB 0 Hz  
GB 0  
PC 1.00

13C

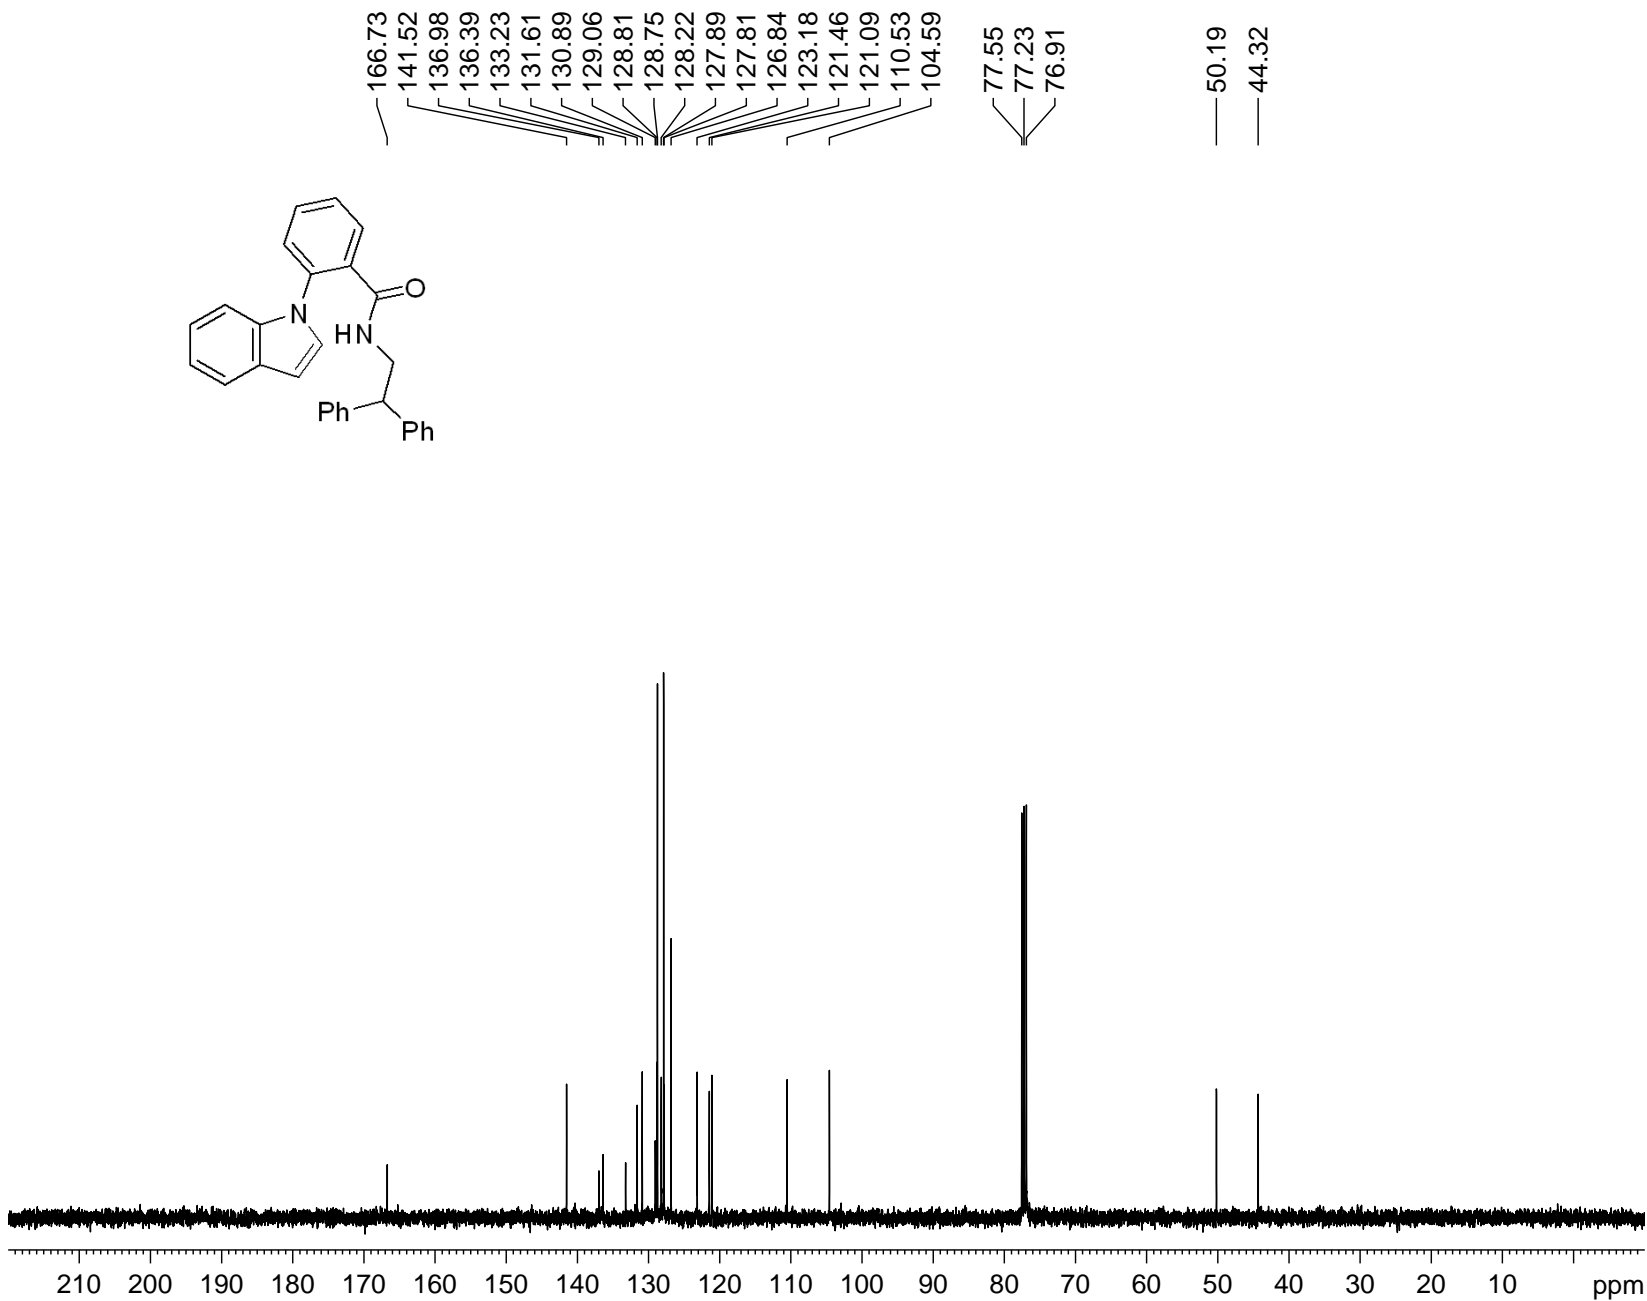

Current Data Parameters

NAME Trimurthulu  
EXPNO 171  
PROCNO 1

F2 - Acquisition Parameters

Date\_ 20121005  
Time 18.50  
INSTRUM spect  
PROBHD 5 mm BBO BB-1H  
PULPROG zgpg30  
TD 32768  
SOLVENT CDCl3  
NS 133  
DS 0  
SWH 24038.461 Hz  
FIDRES 0.733596 Hz  
AQ 0.6816452 sec  
RG 32768  
DW 20.800 usec  
DE 6.50 usec  
TE 299.6 K  
D1 2.00000000 sec  
D11 0.03000000 sec  
TD0 1

===== CHANNEL f1 =====

NUC1 13C  
P1 9.40 usec  
PL1 7.00 dB  
SFO1 100.6233325 MHz

===== CHANNEL f2 =====

CPDPRG2 waltz16  
NUC2 1H  
PCPD2 90.00 usec  
PL2 3.00 dB  
PL12 20.70 dB  
PL13 23.70 dB  
SFO2 400.1316005 MHz

F2 - Processing parameters

SI 32768  
SF 100.6127514 MHz  
WDW EM  
SSB 0  
LB 1.00 Hz  
GB 0  
PC 1.00

<sup>1</sup>H of Thyrosin (SM)

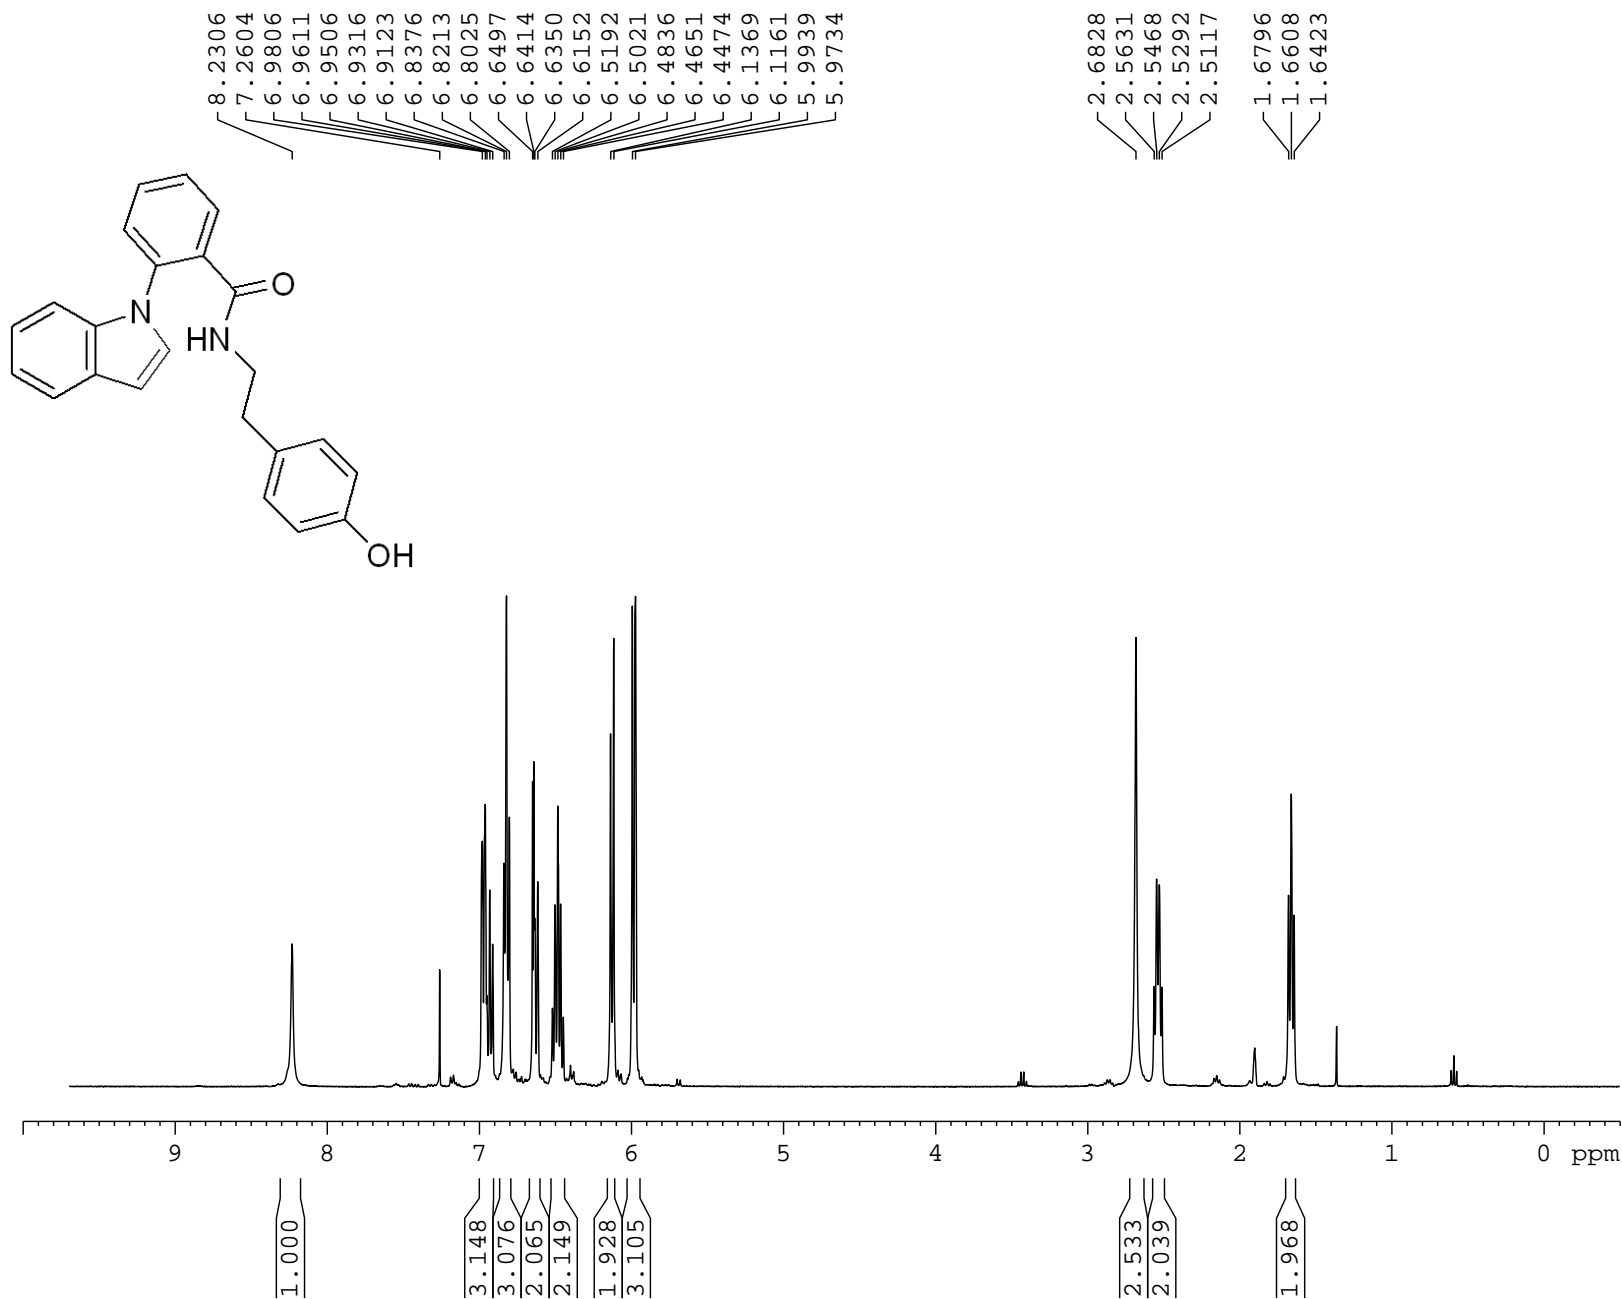

Current Data Parameters  
NAME Trimurthulu  
EXPNO 174  
PROCNO 1

F2 - Acquisition Parameters  
Date\_ 20121013  
Time 12.15  
INSTRUM spect  
PROBHD 5 mm BBO BB-1H  
PULPROG zg30  
TD 32768  
SOLVENT CDCl3  
NS 16  
DS 0  
SWH 7246.377 Hz  
FIDRES 0.221142 Hz  
AQ 2.2611110 sec  
RG 90.5  
DW 69.000 usec  
DE 6.50 usec  
TE 299.1 K  
D1 2.0000000 sec  
TD0 1

===== CHANNEL f1 =====  
NUC1 1H  
P1 11.90 usec  
PL1 3.00 dB  
SFO1 400.1324008 MHz

F2 - Processing parameters  
SI 16384  
SF 400.1321437 MHz  
WDW EM  
SSB 0  
LB 0 Hz  
GB 0  
PC 1.00

13C

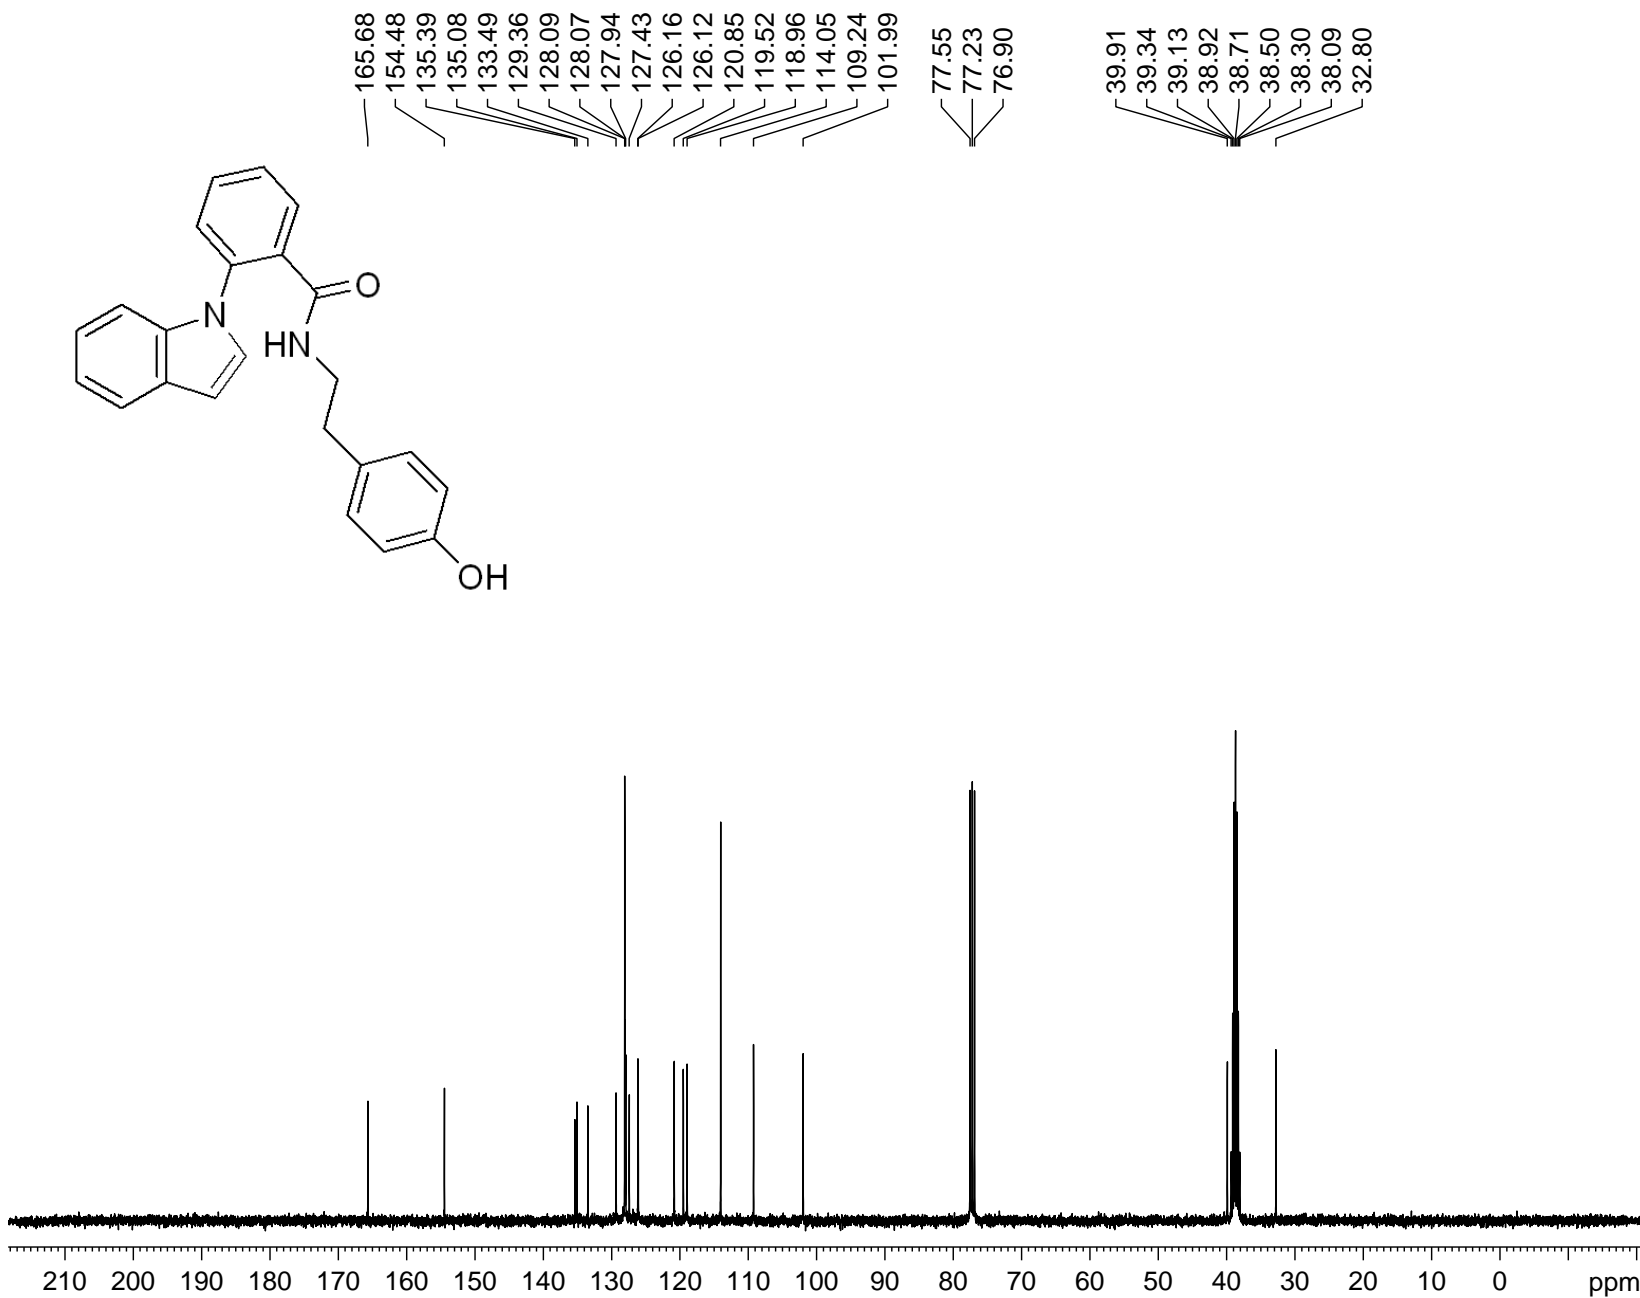

Current Data Parameters  
NAME Trimurthulu  
EXPNO 175  
PROCNO 1

F2 - Acquisition Parameters  
Date\_ 20121013  
Time 12.42  
INSTRUM spect  
PROBHD 5 mm BBO BB-1H  
PULPROG zgpg30  
TD 32768  
SOLVENT CDCl3  
NS 595  
DS 0  
SWH 24038.461 Hz  
FIDRES 0.733596 Hz  
AQ 0.6816452 sec  
RG 32768  
DW 20.800 usec  
DE 6.50 usec  
TE 300.0 K  
D1 2.0000000 sec  
D11 0.03000000 sec  
TD0 1

===== CHANNEL f1 =====  
NUC1 13C  
P1 9.40 usec  
PL1 7.00 dB  
SFO1 100.6233325 MHz

===== CHANNEL f2 =====  
CPDPRG2 waltz16  
NUC2 1H  
PCPD2 90.00 usec  
PL2 3.00 dB  
PL12 20.70 dB  
PL13 23.70 dB  
SFO2 400.1316005 MHz

F2 - Processing parameters  
SI 32768  
SF 100.6133864 MHz  
WDW EM  
SSB 0  
LB 1.00 Hz  
GB 0  
PC 1.00

<sup>1</sup>H of Dodecane S.M

7.9819  
 7.9669  
 7.9629  
 7.6841  
 7.6676  
 7.5772  
 7.5730  
 7.5584  
 7.5540  
 7.5378  
 7.5347  
 7.5188  
 7.5161  
 7.4159  
 7.4133  
 7.3967  
 7.3941  
 7.2602  
 7.2291  
 7.2211  
 7.2083  
 7.1995  
 7.1898  
 7.1782  
 7.1711  
 7.1607  
 6.7171  
 6.7091  
 2.9730  
 2.9569  
 2.9421  
 2.9254  
 1.3209  
 1.3015  
 1.2773  
 1.2317  
 1.2121  
 1.2071  
 1.1913  
 1.1741  
 1.1151  
 1.0961  
 1.0765  
 1.0258  
 1.0081  
 1.0000  
 0.9941  
 0.9148  
 0.8984  
 0.8808  
 0.8364  
 0.8198  
 0.8037  
 0.7868  
 0.7719

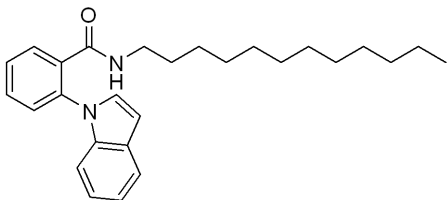

NAME Trimurthulu  
 EXPNO 301  
 PROCNO 1  
 Date\_ 20130525  
 Time 21.57  
 INSTRUM spect  
 PROBHD 5 mm BBO BB-1H  
 PULPROG zg30  
 TD 32768  
 SOLVENT CDCl3  
 NS 4  
 DS 0  
 SWH 7246.377 Hz  
 FIDRES 0.221142 Hz  
 AQ 2.2611110 sec  
 RG 114  
 DW 69.000 usec  
 DE 6.50 usec  
 TE 301.6 K  
 D1 2.0000000 sec  
 TD0 1

===== CHANNEL f1 =====  
 NUC1 1H  
 P1 11.90 usec  
 PL1 3.00 dB  
 SFO1 400.1324008 MHz  
 SI 16384  
 SF 400.1300091 MHz  
 WDW EM  
 SSB 0  
 LB 0.00 Hz  
 GB 0  
 PC 1.00

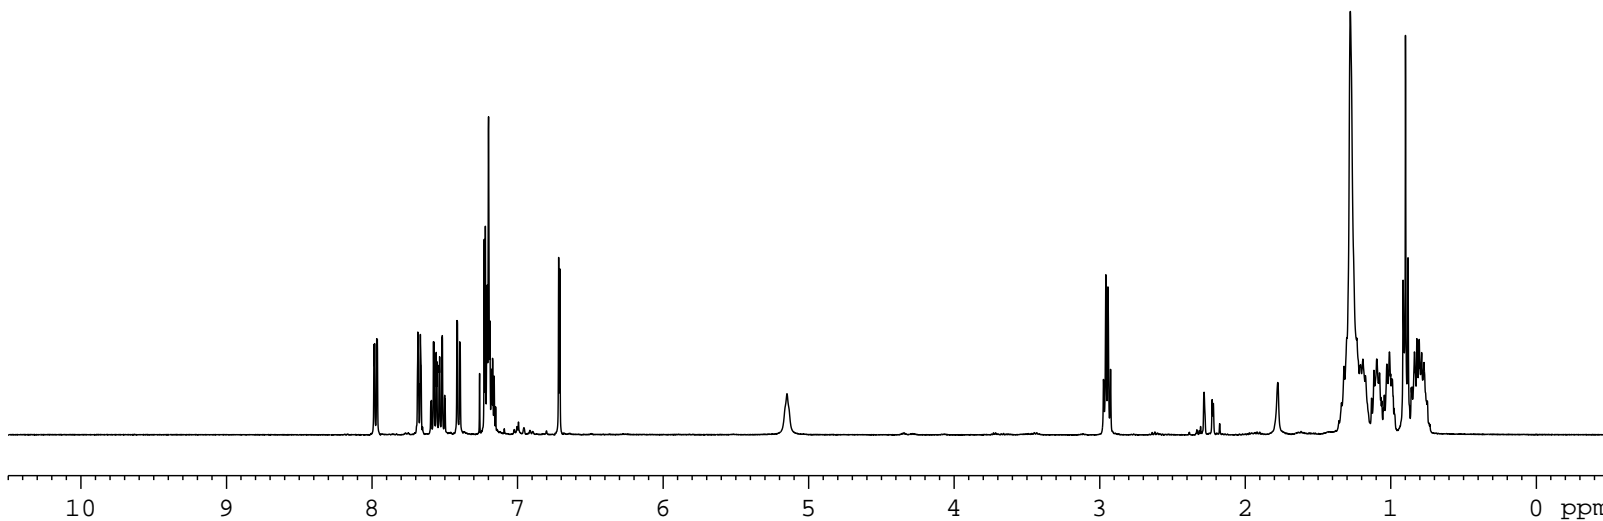

0.992  
 0.992  
 2.055  
 1.043  
 4.093  
 1.000  
 0.939  
 2.031  
 12.287  
 2.279  
 2.235  
 3.352  
 4.221

<sup>1</sup>H of Dodecane S.M

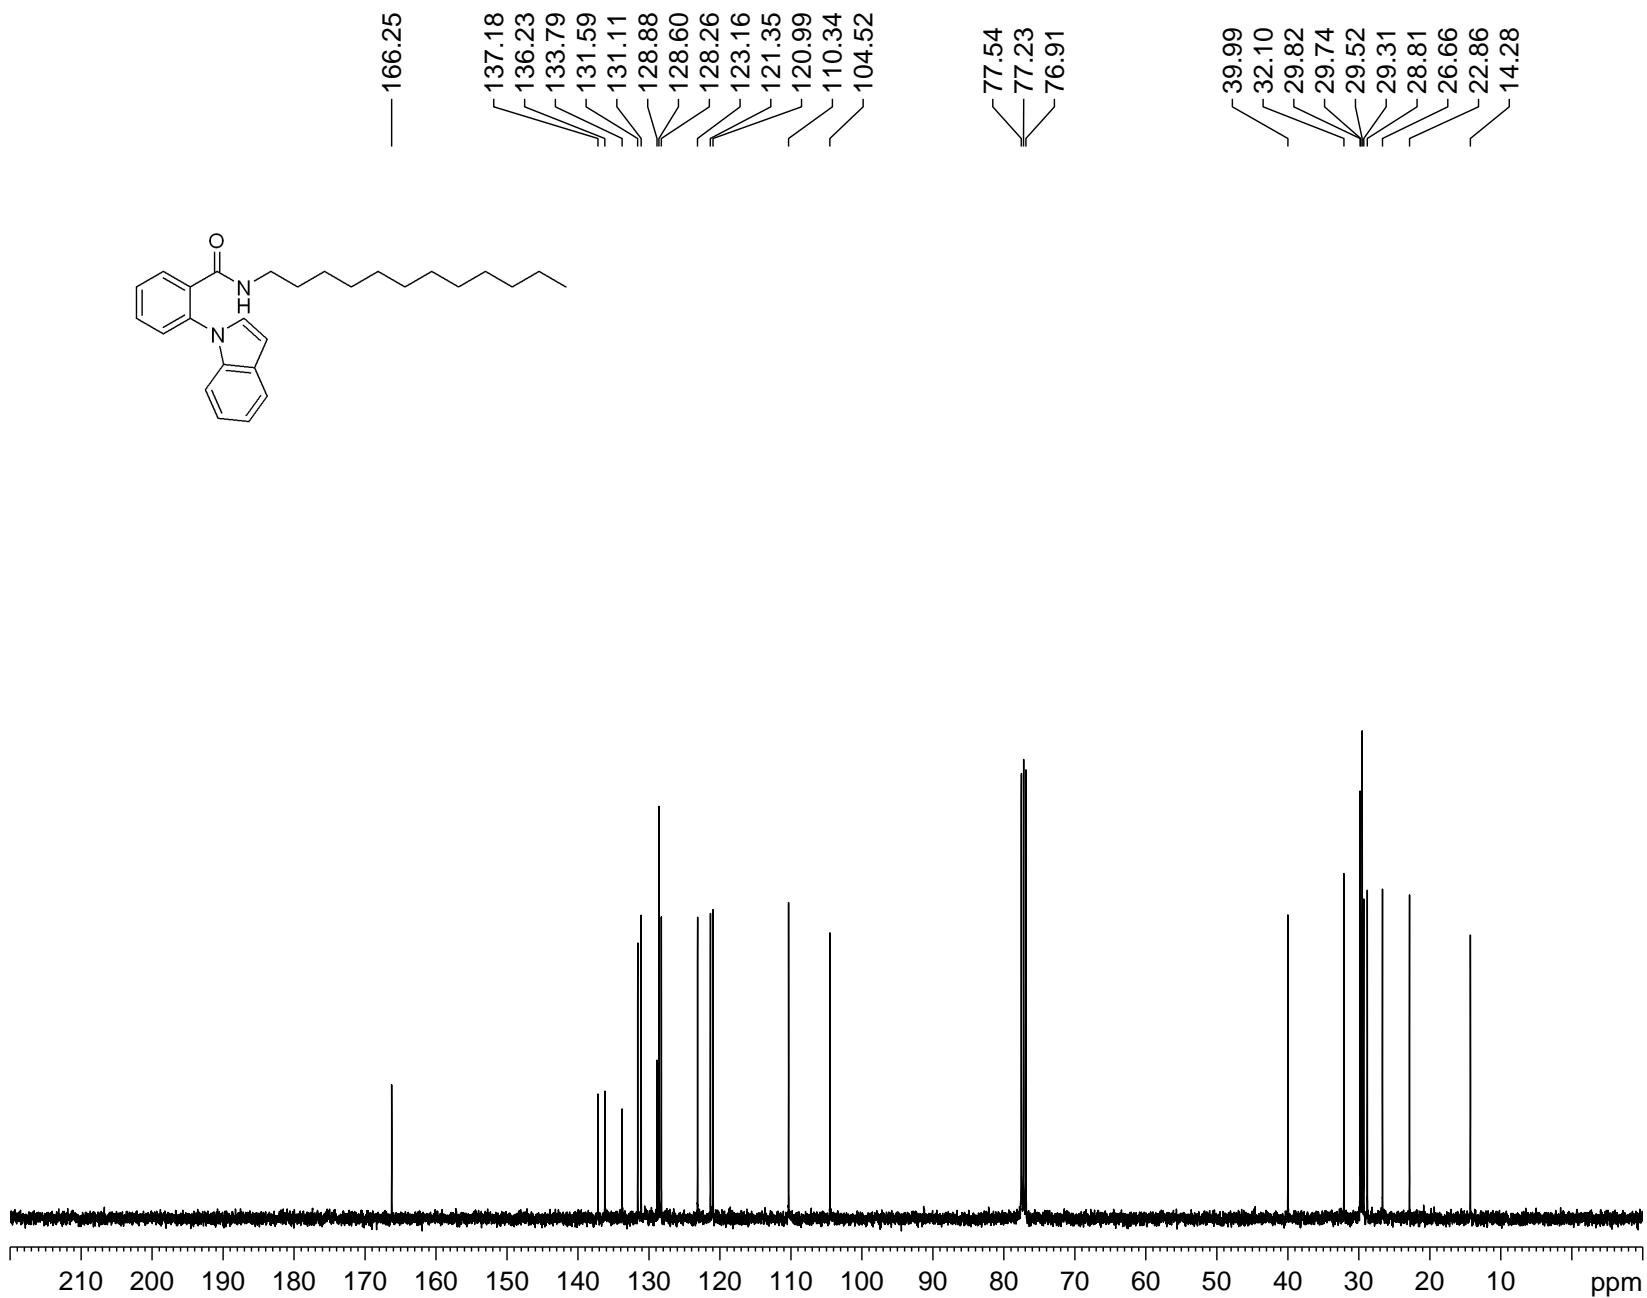

Current Data Parameters

NAME Trimurthulu  
EXPNO 302  
PROCNO 1

F2 - Acquisition Parameters

Date\_ 20130525  
Time 21.58  
INSTRUM spect  
PROBHD 5 mm BBO BB-1H  
PULPROG zgpg30  
TD 32768  
SOLVENT CDCl3  
NS 251  
DS 0  
SWH 24038.461 Hz  
FIDRES 0.733596 Hz  
AQ 0.6816452 sec  
RG 32768  
DW 20.800 usec  
DE 6.50 usec  
TE 301.6 K  
D1 2.00000000 sec  
D11 0.03000000 sec  
TD0 1

===== CHANNEL f1 =====

NUC1 13C  
P1 9.40 usec  
PL1 7.00 dB  
SFO1 100.6233325 MHz

===== CHANNEL f2 =====

CPDPRG2 waltz16  
NUC2 1H  
PCPD2 90.00 usec  
PL2 3.00 dB  
PL12 20.70 dB  
PL13 23.70 dB  
SFO2 400.1316005 MHz

F2 - Processing parameters

SI 32768  
SF 100.6127524 MHz  
WDW EM  
SSB 0  
LB 1.00 Hz  
GB 0  
PC 1.00



<sup>1</sup>H of 5-OMe-indole (SM)

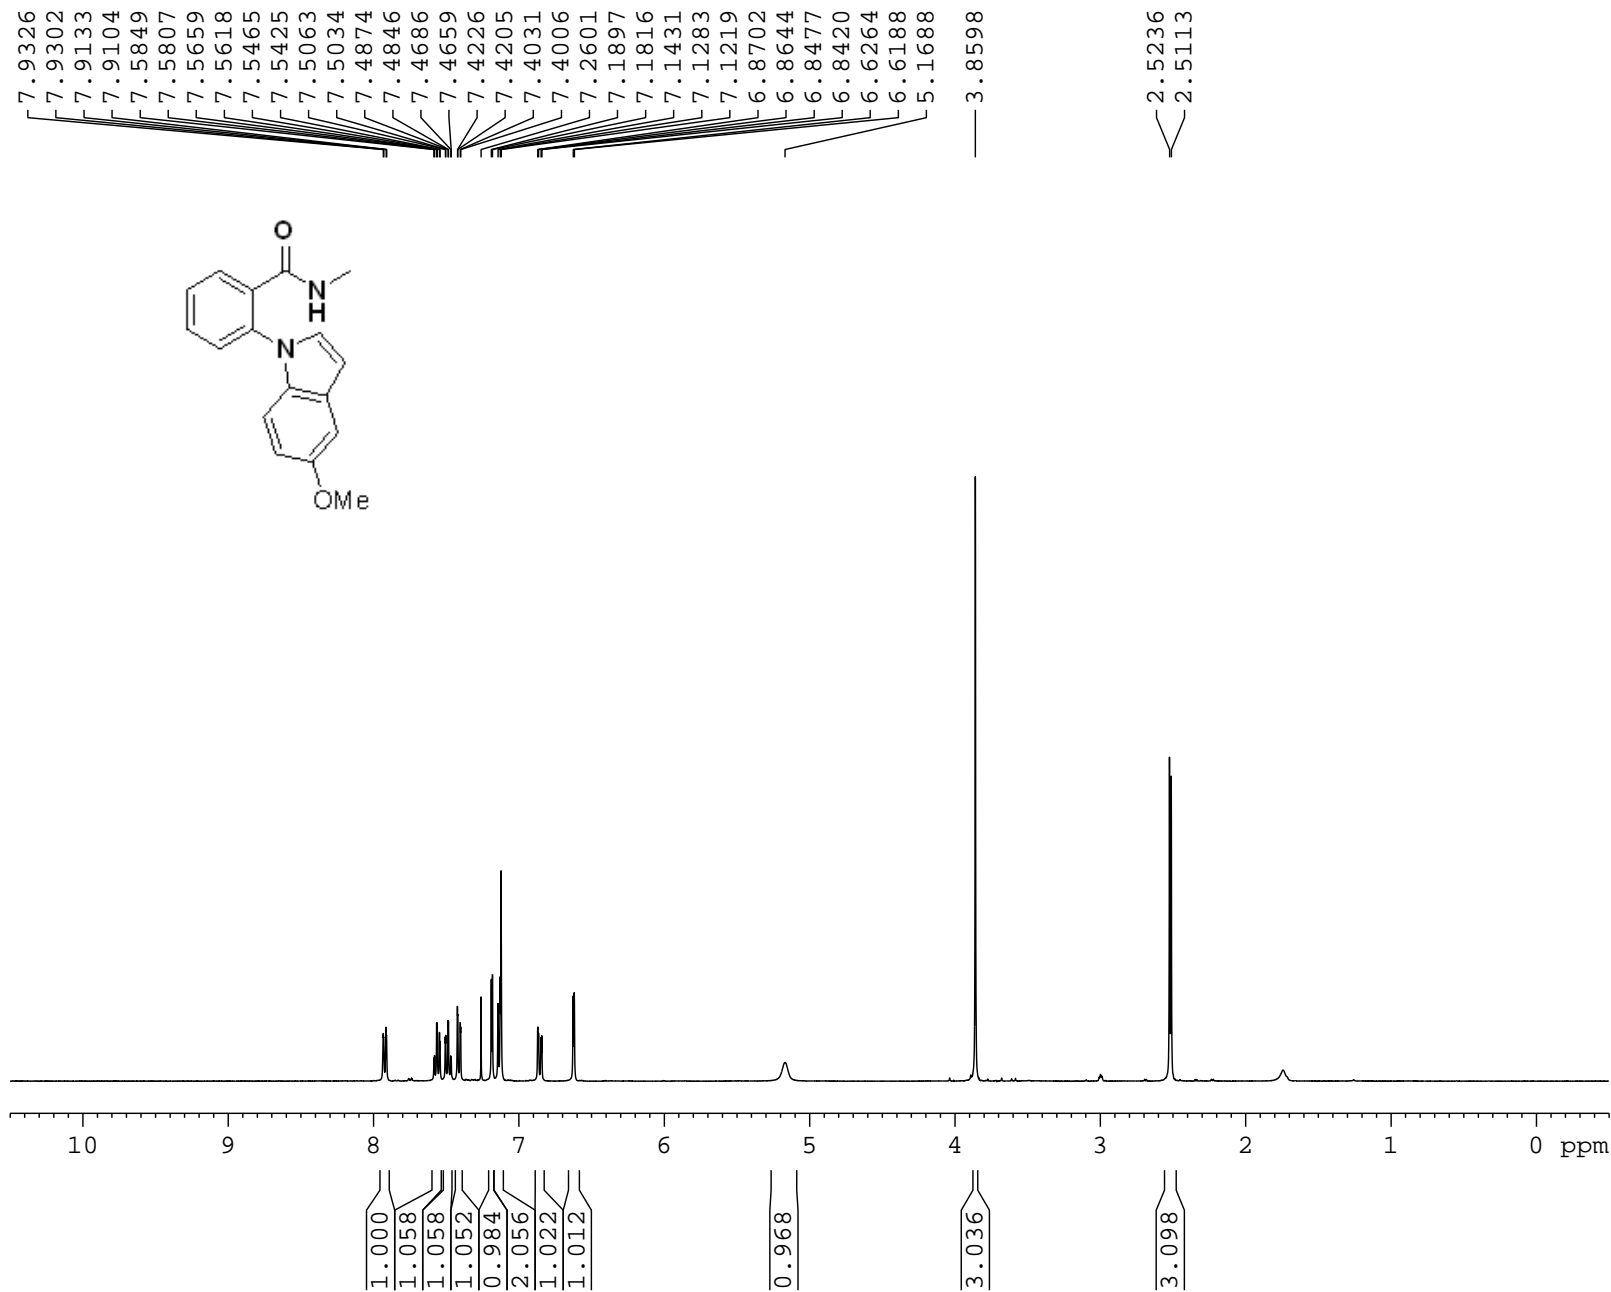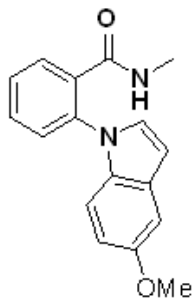

Current Data Parameters  
NAME Trimurthulu  
EXPNO 166  
PROCNO 1

F2 - Acquisition Parameters  
Date\_ 20121005  
Time 18.12  
INSTRUM spect  
PROBHD 5 mm BBO BB-1H  
PULPROG zg30  
TD 32768  
SOLVENT CDCl3  
NS 16  
DS 0  
SWH 7246.377 Hz  
FIDRES 0.221142 Hz  
AQ 2.2611110 sec  
RG 114  
DW 69.000 usec  
DE 6.50 usec  
TE 299.0 K  
D1 2.0000000 sec  
TD0 1

===== CHANNEL f1 =====  
NUC1 1H  
P1 11.90 usec  
PL1 3.00 dB  
SFO1 400.1324008 MHz

F2 - Processing parameters  
SI 16384  
SF 400.1300091 MHz  
WDW EM  
SSB 0  
LB 0 Hz  
GB 0  
PC 1.00

13C

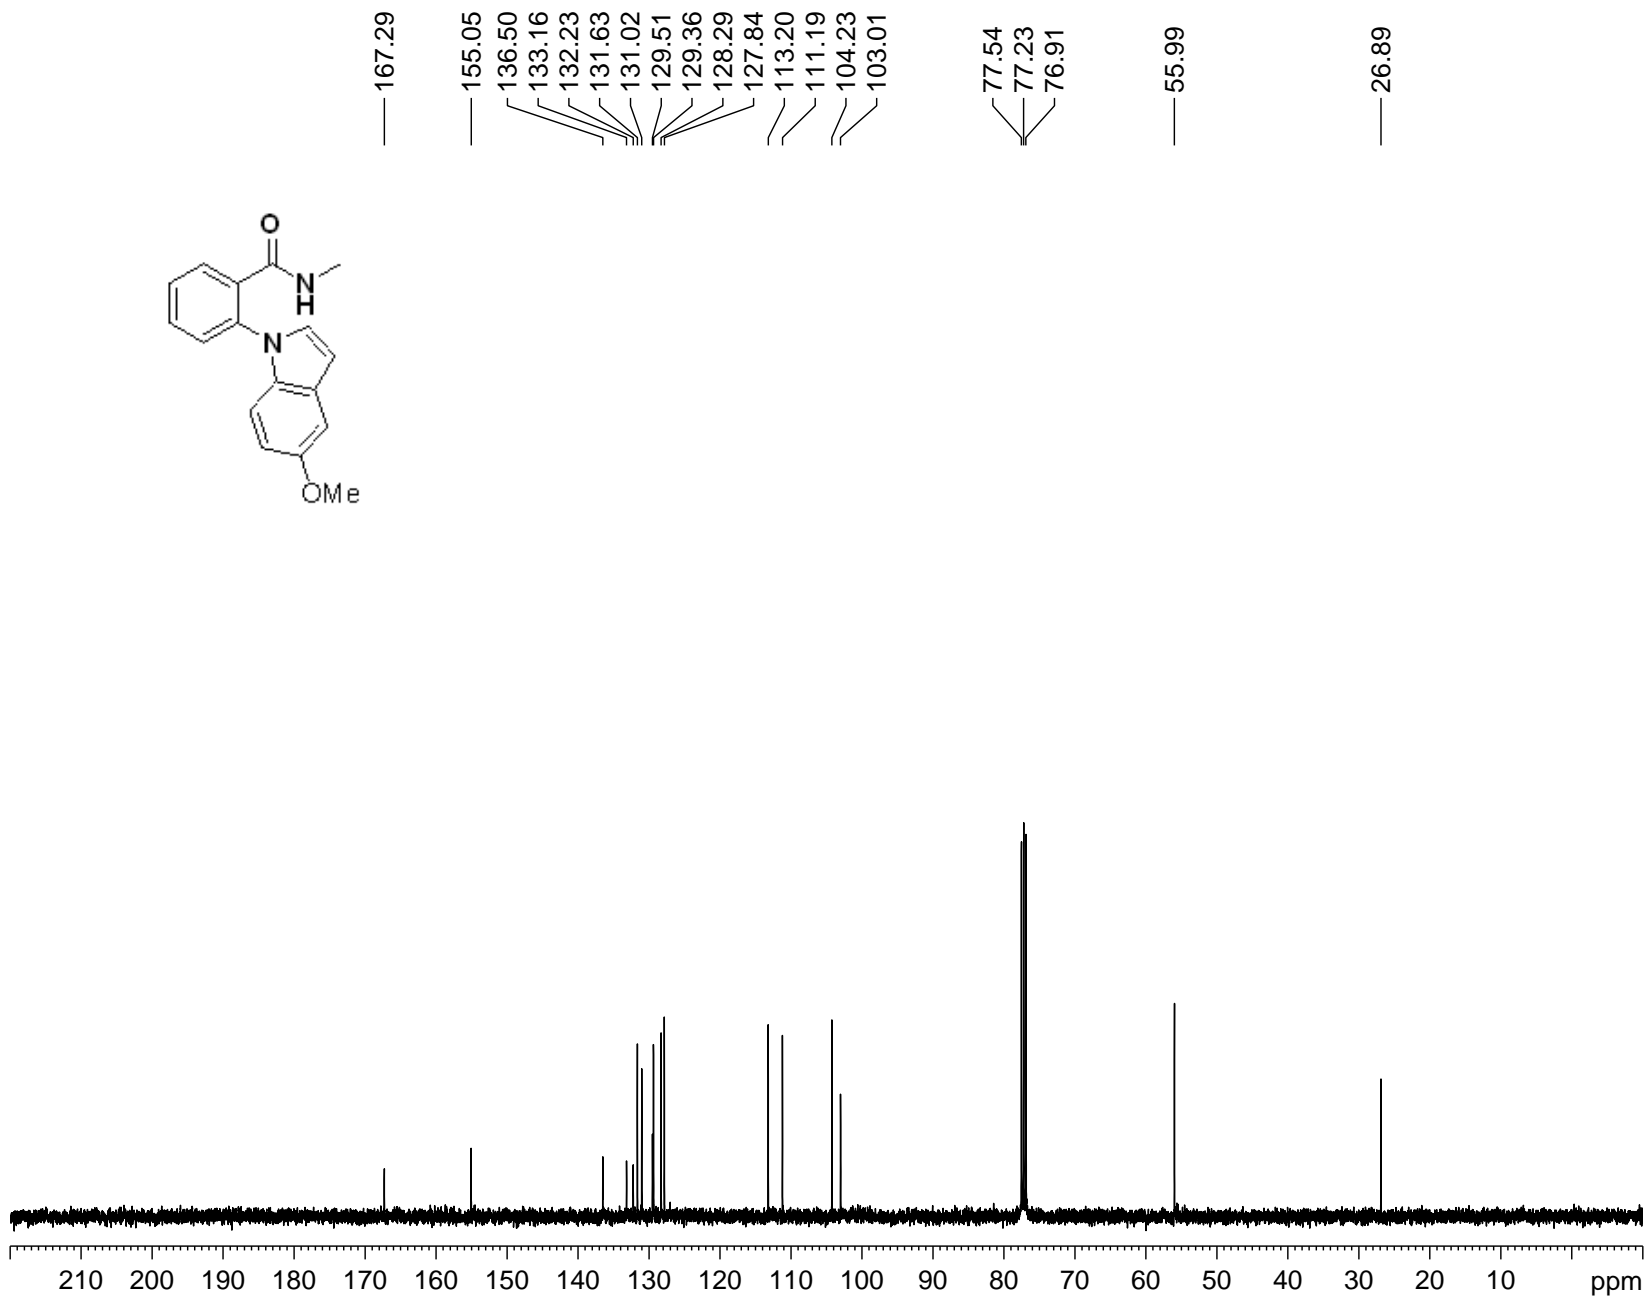

Current Data Parameters

NAME Trimurthulu  
EXPNO 167  
PROCNO 1

F2 - Acquisition Parameters

Date\_ 20121005  
Time 18.19  
INSTRUM spect  
PROBHD 5 mm BBO BB-1H  
PULPROG zgpg30  
TD 32768  
SOLVENT CDCl3  
NS 188  
DS 0  
SWH 24038.461 Hz  
FIDRES 0.733596 Hz  
AQ 0.6816452 sec  
RG 32768  
DW 20.800 usec  
DE 6.50 usec  
TE 299.6 K  
D1 2.0000000 sec  
D11 0.03000000 sec  
TD0 1

===== CHANNEL f1 =====

NUC1 13C  
P1 9.40 usec  
PL1 7.00 dB  
SFO1 100.6233325 MHz

===== CHANNEL f2 =====

CPDPRG2 waltz16  
NUC2 1H  
PCPD2 90.00 usec  
PL2 3.00 dB  
PL12 20.70 dB  
PL13 23.70 dB  
SFO2 400.1316005 MHz

F2 - Processing parameters

SI 32768  
SF 100.6127509 MHz  
WDW EM  
SSB 0  
LB 1.00 Hz  
GB 0  
PC 1.00

<sup>1</sup>H of 5-Benzoxo indole-starting material

7.9260  
7.9223  
7.5909  
7.5871  
7.5719  
7.5681  
7.5529  
7.5489  
7.5144  
7.5118  
7.4924  
7.4726  
7.4299  
7.4280  
7.4121  
7.3952  
7.3761  
7.3445  
7.3264  
7.3084  
7.2601  
7.2163  
7.2105  
7.1973  
7.1893  
7.1631  
7.1408  
6.9681  
6.9623  
6.9459  
6.9399  
6.6248  
6.6171  
5.1252

2.5289  
2.5167

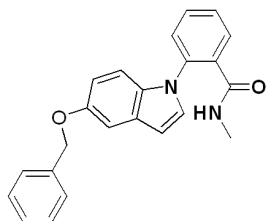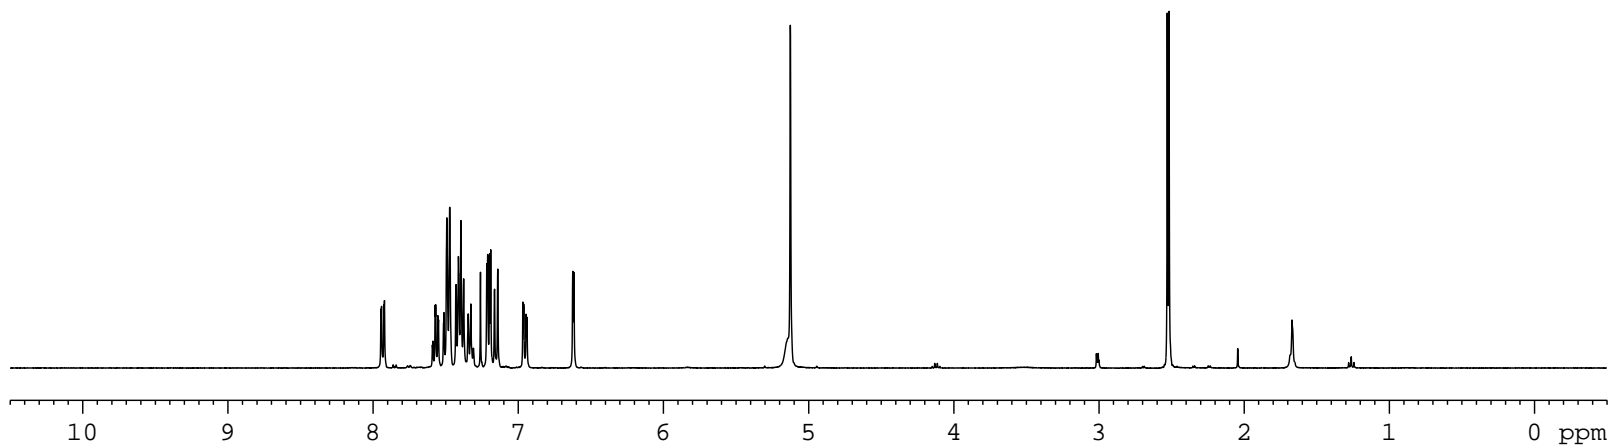

1.000  
1.051  
3.058  
3.071  
1.054  
2.023  
1.010  
1.042  
1.015

3.044

3.076

Current Data Parameters  
NAME Trimurthulu  
EXPNO 45  
PROCNO 1

F2 - Acquisition Parameters  
Date\_ 20120511  
Time 18.28  
INSTRUM spect  
PROBHD 5 mm BBO BB-1H  
PULPROG zg30  
TD 32768  
SOLVENT CDCl3  
NS 16  
DS 0  
SWH 7246.377 Hz  
FIDRES 0.221142 Hz  
AQ 2.2611110 sec  
RG 114  
DW 69.000 usec  
DE 6.50 usec  
TE 298.9 K  
D1 2.0000000 sec  
TD0 1

===== CHANNEL f1 =====  
NUC1 1H  
P1 11.70 usec  
PL1 4.00 dB  
SFO1 400.1324008 MHz

F2 - Processing parameters  
SI 16384  
SF 400.1300087 MHz  
WDW EM  
SSB 0  
LB 0 Hz  
GB 0  
PC 1.00

13C

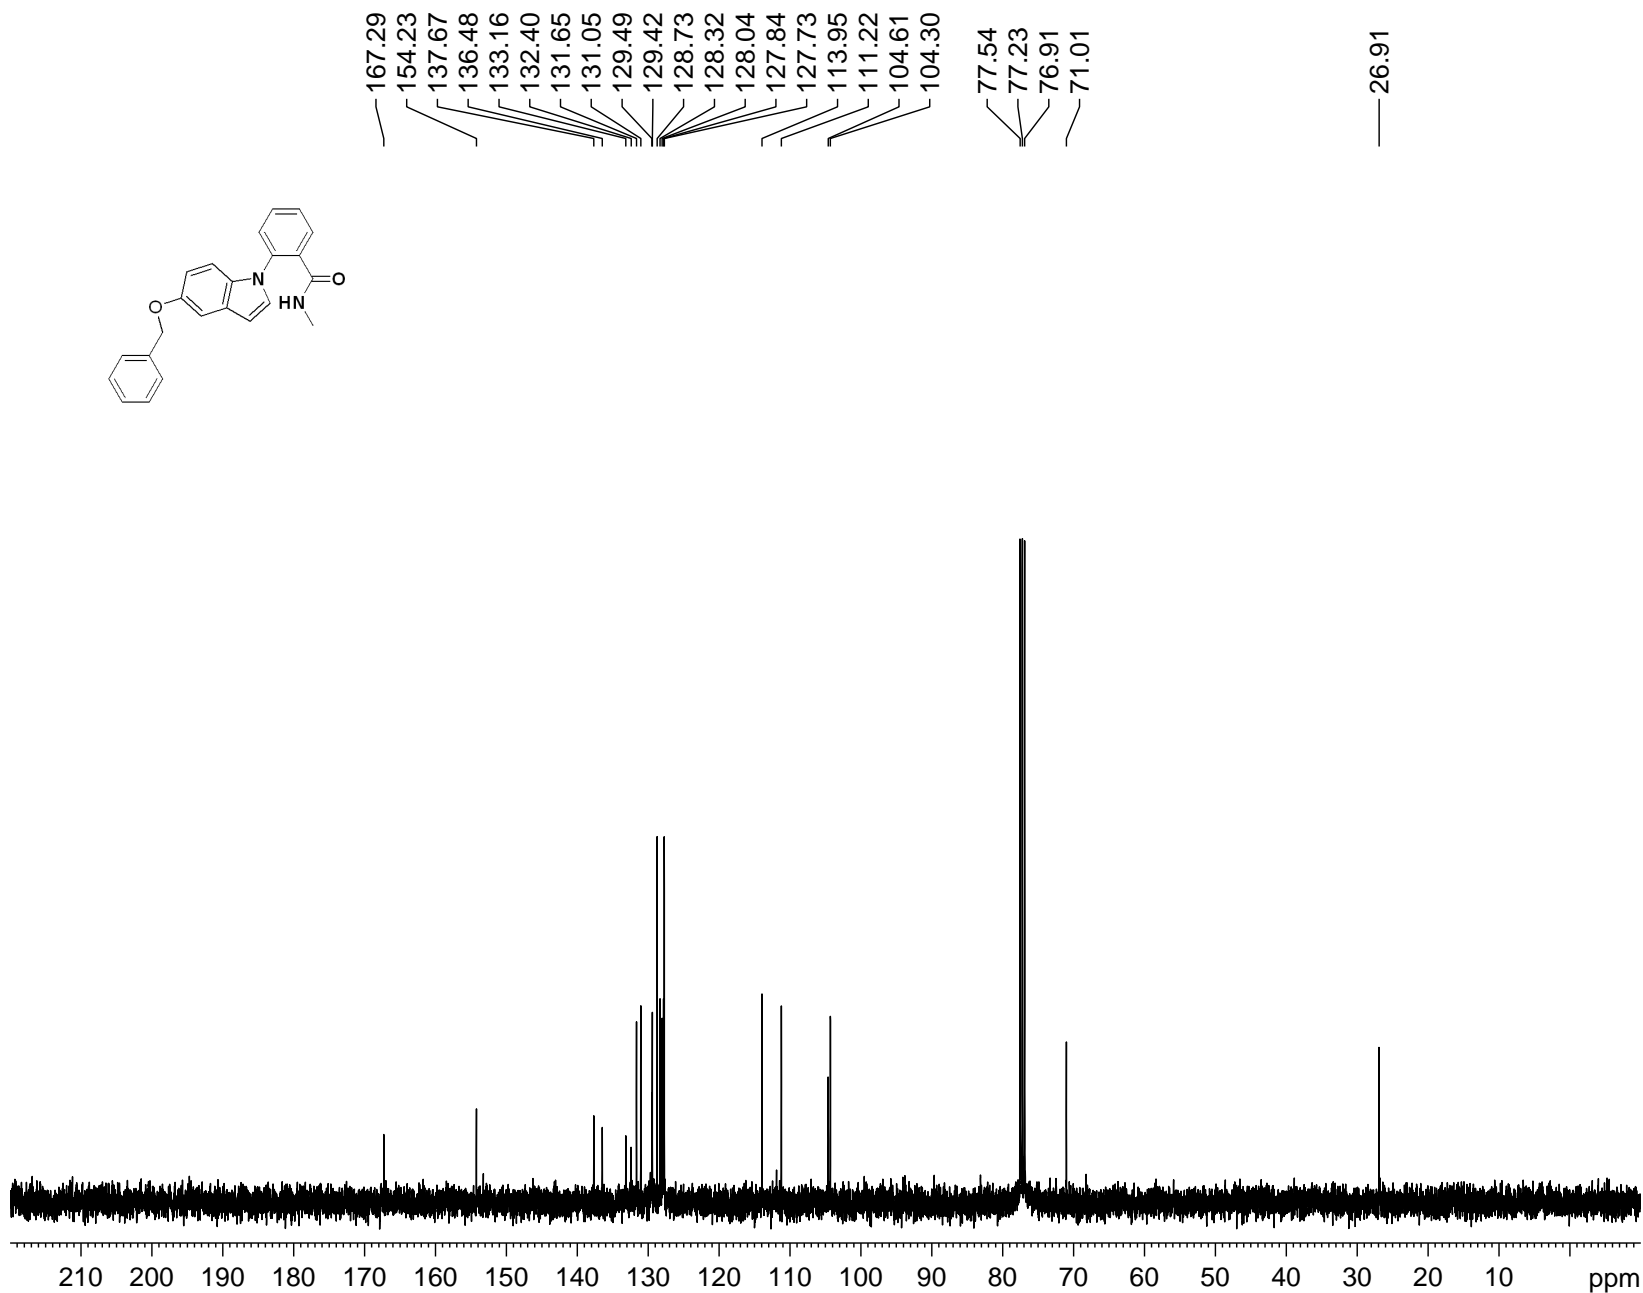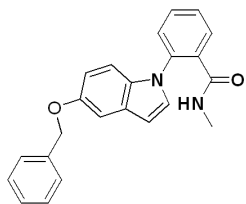

Current Data Parameters  
NAME Trimurthulu  
EXPNO 46  
PROCNO 1

F2 - Acquisition Parameters  
Date\_ 20120511  
Time 18.32  
INSTRUM spect  
PROBHD 5 mm BBO BB-1H  
PULPROG zgpg30  
TD 32768  
SOLVENT CDCl3  
NS 156  
DS 0  
SWH 24038.461 Hz  
FIDRES 0.733596 Hz  
AQ 0.6816452 sec  
RG 32768  
DW 20.800 usec  
DE 6.50 usec  
TE 299.3 K  
D1 2.00000000 sec  
D11 0.03000000 sec  
TD0 1

===== CHANNEL f1 =====  
NUC1 13C  
P1 8.90 usec  
PL1 7.00 dB  
SFO1 100.6233325 MHz

===== CHANNEL f2 =====  
CPDPRG2 waltz16  
NUC2 1H  
PCPD2 90.00 usec  
PL2 3.80 dB  
PL12 21.60 dB  
PL13 24.60 dB  
SFO2 400.1316005 MHz

F2 - Processing parameters  
SI 32768  
SF 100.6127506 MHz  
WDW EM  
SSB 0  
LB 1.00 Hz  
GB 0  
PC 1.00

<sup>1</sup>H of 5-chloro indole-starting material

7.9165  
7.9135  
7.8974  
7.6473  
7.6083  
7.5929  
7.5894  
7.5740  
7.5698  
7.5427  
7.5400  
7.5240  
7.5212  
7.5052  
7.5024  
7.4225  
7.4207  
7.4028  
7.2600  
7.2516  
7.1563  
6.6530  
6.6451  
5.0824

2.5355  
2.5232

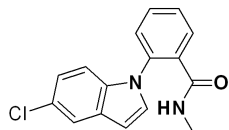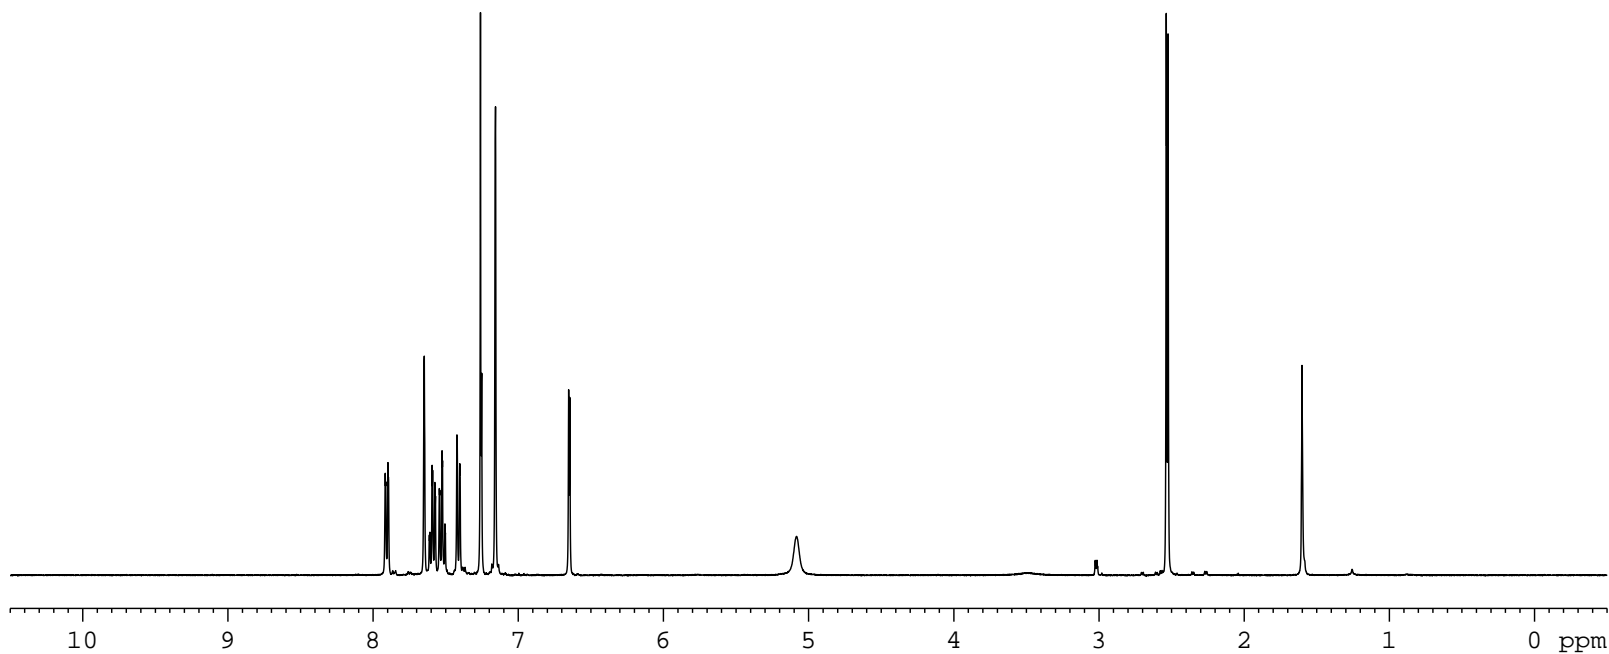

1.000  
0.962  
1.072  
1.079  
1.055  
1.826  
1.945  
0.998

0.917

3.043

Current Data Parameters  
NAME Trimurthulu  
EXPNO 61  
PROCNO 1

F2 - Acquisition Parameters  
Date\_ 20120518  
Time 22.33  
INSTRUM spect  
PROBHD 5 mm BBO BB-1H  
PULPROG zg30  
TD 32768  
SOLVENT CDCl3  
NS 16  
DS 0  
SWH 7246.377 Hz  
FIDRES 0.221142 Hz  
AQ 2.2611110 sec  
RG 181  
DW 69.000 usec  
DE 6.50 usec  
TE 298.6 K  
D1 2.0000000 sec  
TD0 1

===== CHANNEL f1 =====  
NUC1 1H  
P1 11.70 usec  
PL1 4.00 dB  
SFO1 400.1324008 MHz

F2 - Processing parameters  
SI 16384  
SF 400.1300087 MHz  
WDW EM  
SSB 0  
LB 0 Hz  
GB 0  
PC 1.00

13C

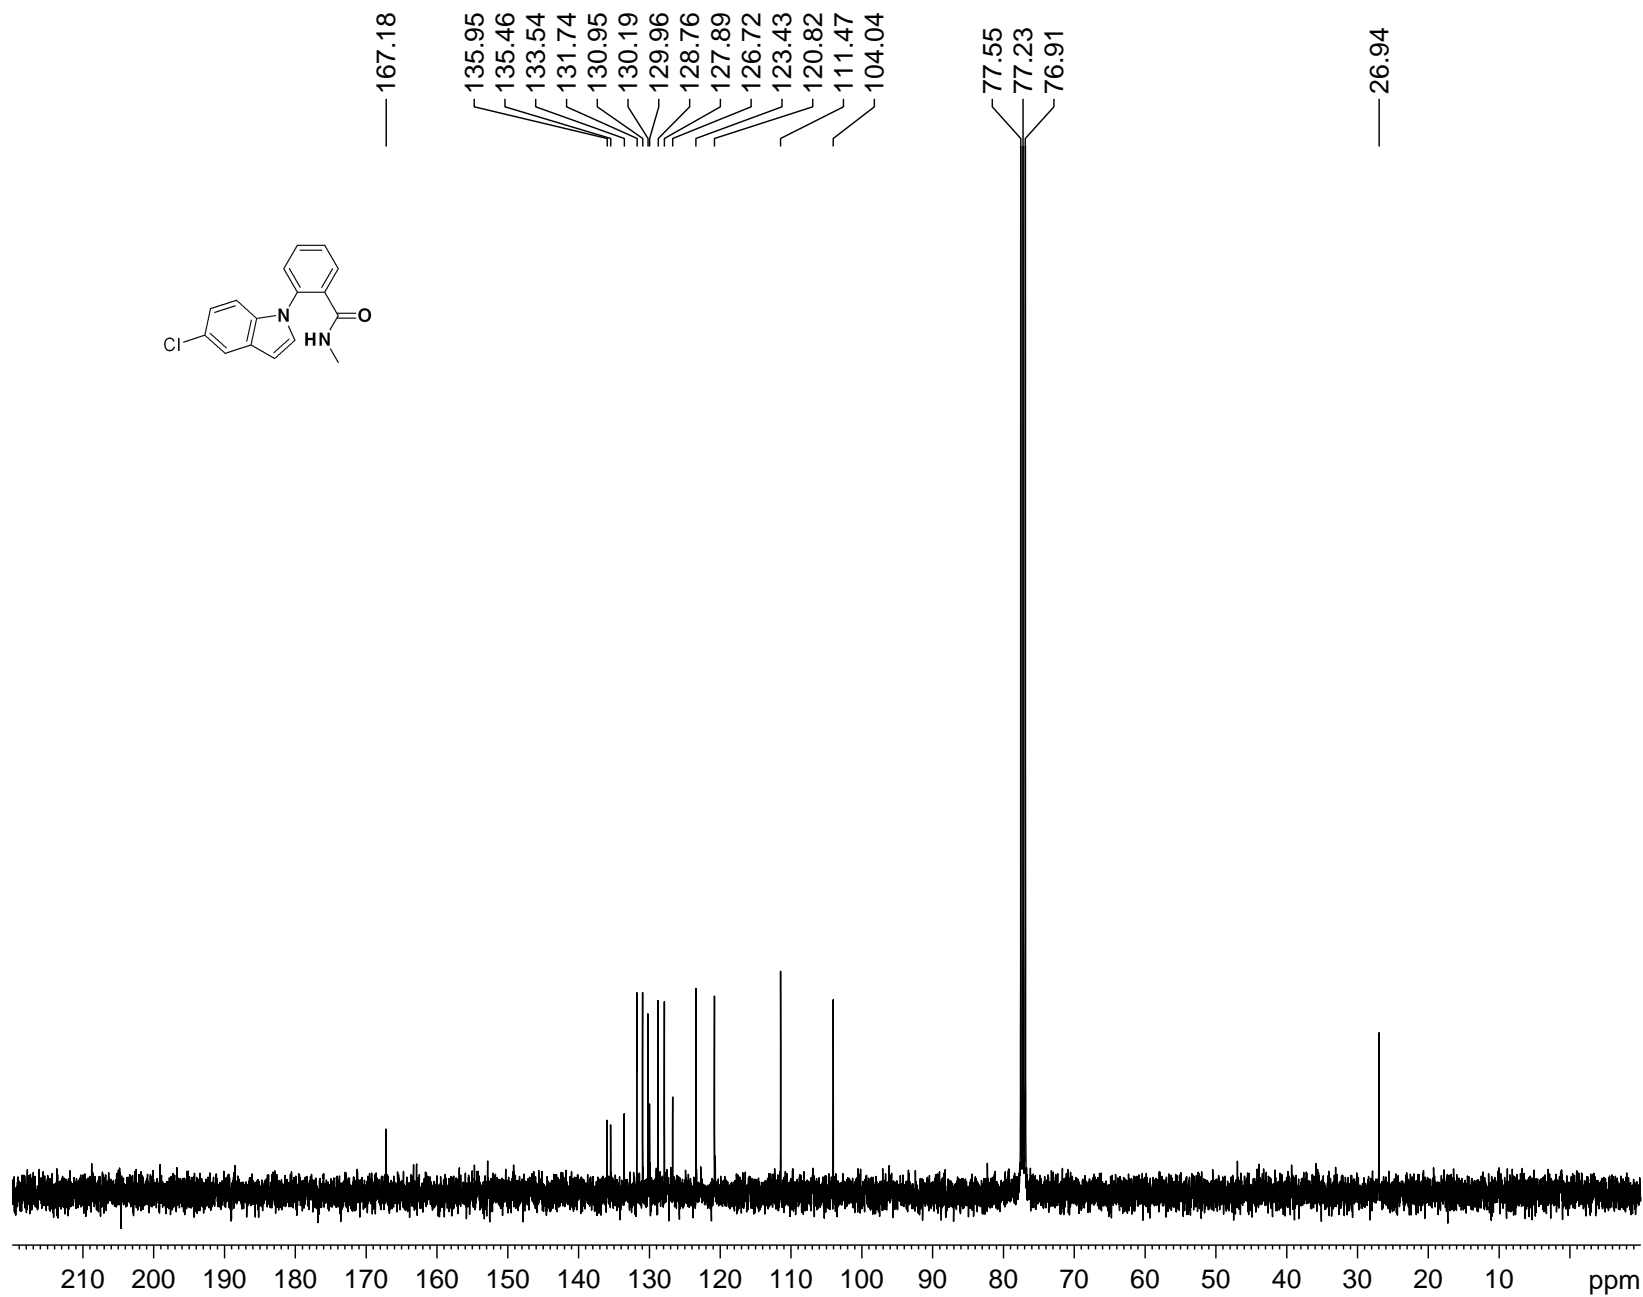

Current Data Parameters

NAME Trimurthulu  
EXPNO 62  
PROCNO 1

F2 - Acquisition Parameters

Date\_ 20120518  
Time 22.39  
INSTRUM spect  
PROBHD 5 mm BBO BB-1H  
PULPROG zgpg30  
TD 32768  
SOLVENT CDCl3  
NS 224  
DS 0  
SWH 24038.461 Hz  
FIDRES 0.733596 Hz  
AQ 0.6816452 sec  
RG 32768  
DW 20.800 usec  
DE 6.50 usec  
TE 299.0 K  
D1 2.0000000 sec  
D11 0.0300000 sec  
TD0 1

===== CHANNEL f1 =====

NUC1 13C  
P1 8.90 usec  
PL1 7.00 dB  
SFO1 100.6233325 MHz

===== CHANNEL f2 =====

CPDPRG2 waltz16  
NUC2 1H  
PCPD2 90.00 usec  
PL2 3.80 dB  
PL12 21.60 dB  
PL13 24.60 dB  
SFO2 400.1316005 MHz

F2 - Processing parameters

SI 32768  
SF 100.6127477 MHz  
WDW EM  
SSB 0  
LB 1.00 Hz  
GB 0  
PC 1.00

<sup>1</sup>H of 5-Bromoindole

7.8673  
7.8517  
7.8480  
7.7975  
7.7934  
7.5995  
7.5959  
7.5806  
7.5767  
7.5617  
7.5575  
7.5250  
7.5221  
7.5060  
7.5032  
7.4870  
7.4845  
7.4066  
7.4042  
7.3869  
7.3850  
7.3511  
7.2814  
7.2770  
7.2599  
7.2554  
7.2287  
7.2205  
7.1064  
7.0845  
6.6370  
6.6294  
5.1820

2.5182  
2.5060

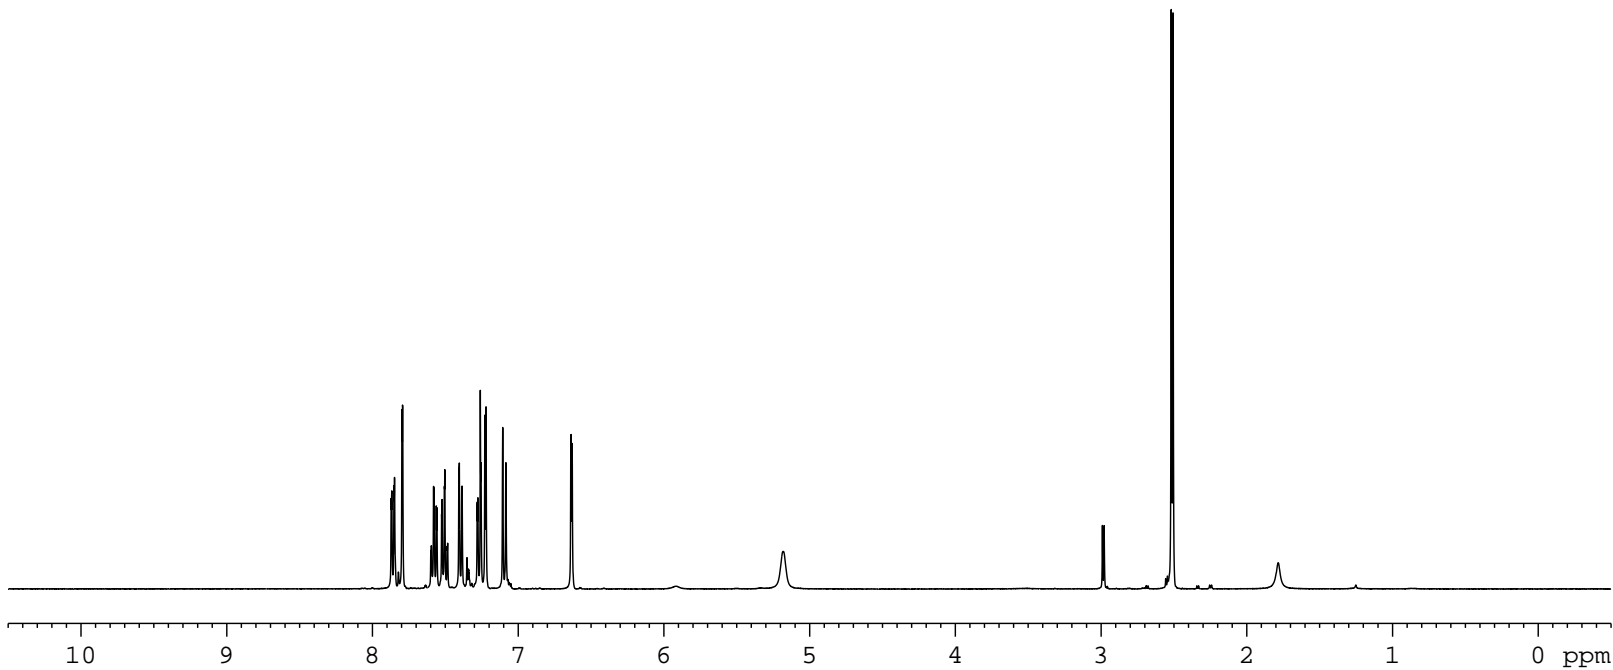

0.925  
0.963  
0.946  
1.019  
0.640  
0.867  
1.057  
0.800  
0.992

0.928

2.917

Current Data Parameters  
NAME Trimurthulu  
EXPNO 143  
PROCNO 1

F2 - Acquisition Parameters  
Date\_ 20120822  
Time 12.39  
INSTRUM spect  
PROBHD 5 mm BBO BB-1H  
PULPROG zg30  
TD 32768  
SOLVENT CDCl3  
NS 16  
DS 0  
SWH 7246.377 Hz  
FIDRES 0.221142 Hz  
AQ 2.2611110 sec  
RG 128  
DW 69.000 usec  
DE 6.50 usec  
TE 298.8 K  
D1 2.00000000 sec  
TD0 1

===== CHANNEL f1 =====  
NUC1 1H  
P1 11.70 usec  
PL1 4.00 dB  
SFO1 400.1324008 MHz

F2 - Processing parameters  
SI 16384  
SF 400.1300087 MHz  
WDW EM  
SSB 0  
LB 0 Hz  
GB 0  
PC 1.00

13C

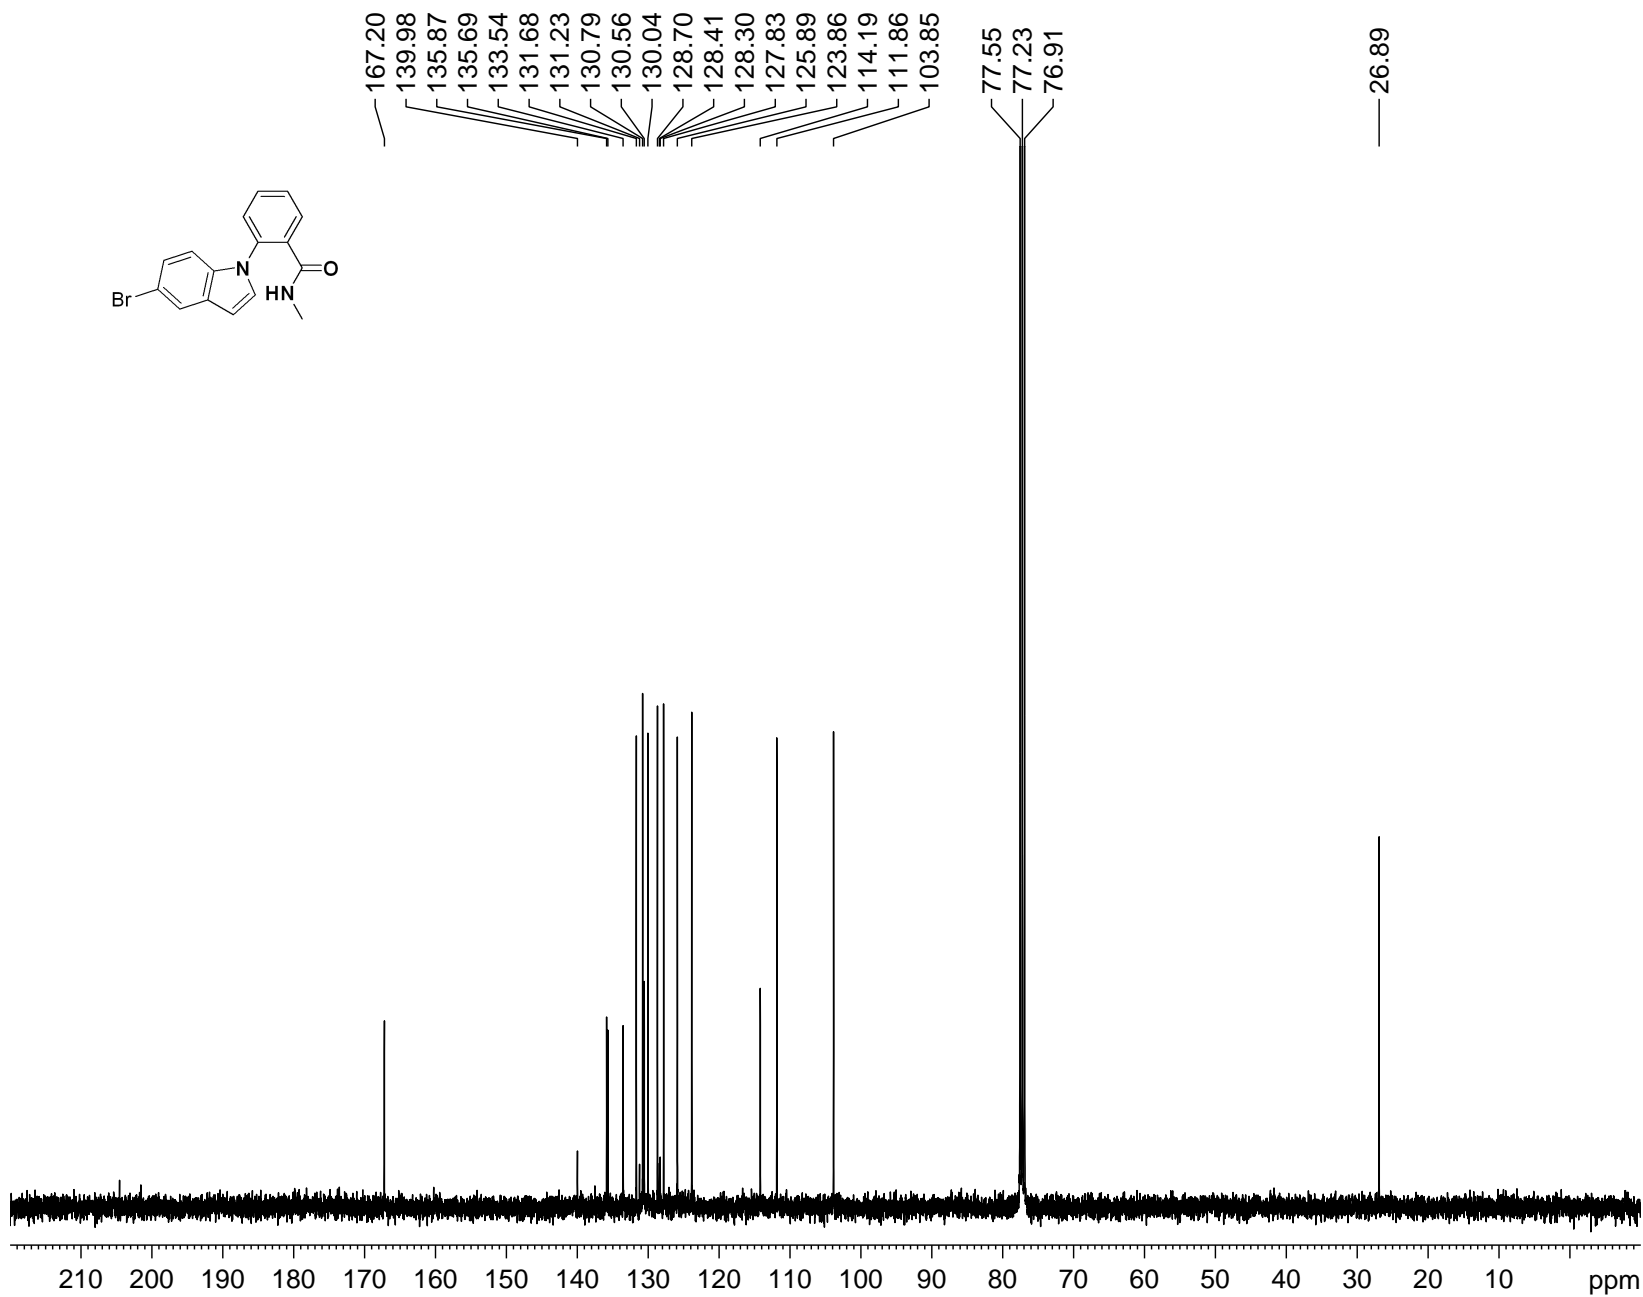

Current Data Parameters

NAME Trimurthulu  
EXPNO 144  
PROCNO 1

F2 - Acquisition Parameters

Date\_ 20120822  
Time 12.51  
INSTRUM spect  
PROBHD 5 mm BBO BB-1H  
PULPROG zgpg30  
TD 32768  
SOLVENT CDCl3  
NS 298  
DS 0  
SWH 24038.461 Hz  
FIDRES 0.733596 Hz  
AQ 0.6816452 sec  
RG 32768  
DW 20.800 usec  
DE 6.50 usec  
TE 299.3 K  
D1 2.00000000 sec  
D11 0.03000000 sec  
TD0 1

===== CHANNEL f1 =====

NUC1 13C  
P1 8.90 usec  
PL1 7.00 dB  
SFO1 100.6233325 MHz

===== CHANNEL f2 =====

CPDPRG2 waltz16  
NUC2 1H  
PCPD2 90.00 usec  
PL2 3.80 dB  
PL12 21.60 dB  
PL13 24.60 dB  
SFO2 400.1316005 MHz

F2 - Processing parameters

SI 32768  
SF 100.6127521 MHz  
WDW EM  
SSB 0  
LB 1.00 Hz  
GB 0  
PC 1.00



<sup>1</sup>H Cl-NH-c=o-Ph-indole (SM)

8.1141  
8.0931  
7.7391  
7.7221  
7.5867  
7.5656  
7.5110  
7.5065  
7.2750  
7.2600  
7.2506  
7.2441  
7.2315  
7.2265  
7.1497  
7.1304  
7.1108  
7.0145  
6.9959  
6.9777  
6.8520  
6.8323  
6.7891  
6.7812

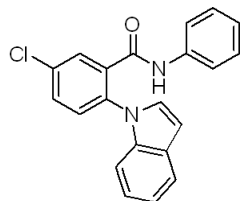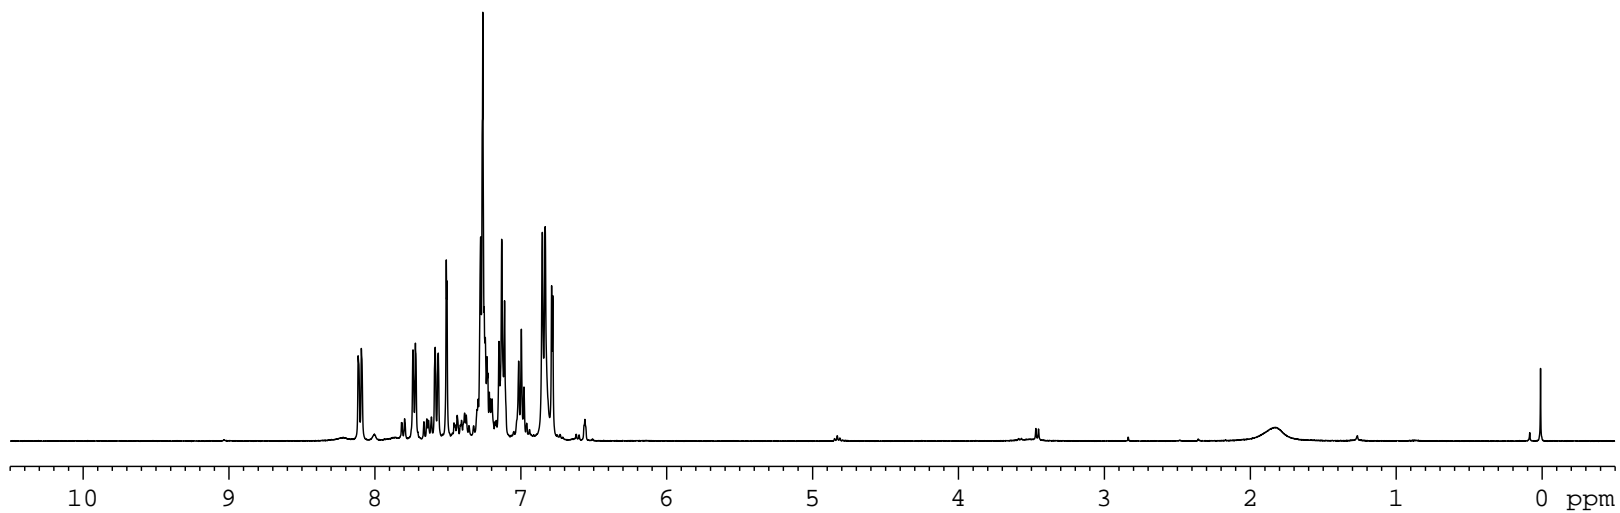

1.000  
1.010  
1.008  
0.991  
4.318  
2.257  
1.191  
2.850  
1.053

Current Data Parameters  
NAME Trimurthulu  
EXPNO 159  
PROCNO 1

F2 - Acquisition Parameters  
Date\_ 20120915  
Time 20.06  
INSTRUM spect  
PROBHD 5 mm BBO BB-1H  
PULPROG zg30  
TD 32768  
SOLVENT CDCl3  
NS 16  
DS 0  
SWH 7246.377 Hz  
FIDRES 0.221142 Hz  
AQ 2.2611110 sec  
RG 181  
DW 69.000 usec  
DE 6.50 usec  
TE 299.1 K  
D1 2.0000000 sec  
TD0 1

===== CHANNEL f1 =====  
NUC1 1H  
P1 11.70 usec  
PL1 4.00 dB  
SFO1 400.1324008 MHz

F2 - Processing parameters  
SI 16384  
SF 400.1300086 MHz  
WDW EM  
SSB 0  
LB 0 Hz  
GB 0  
PC 1.00

13C

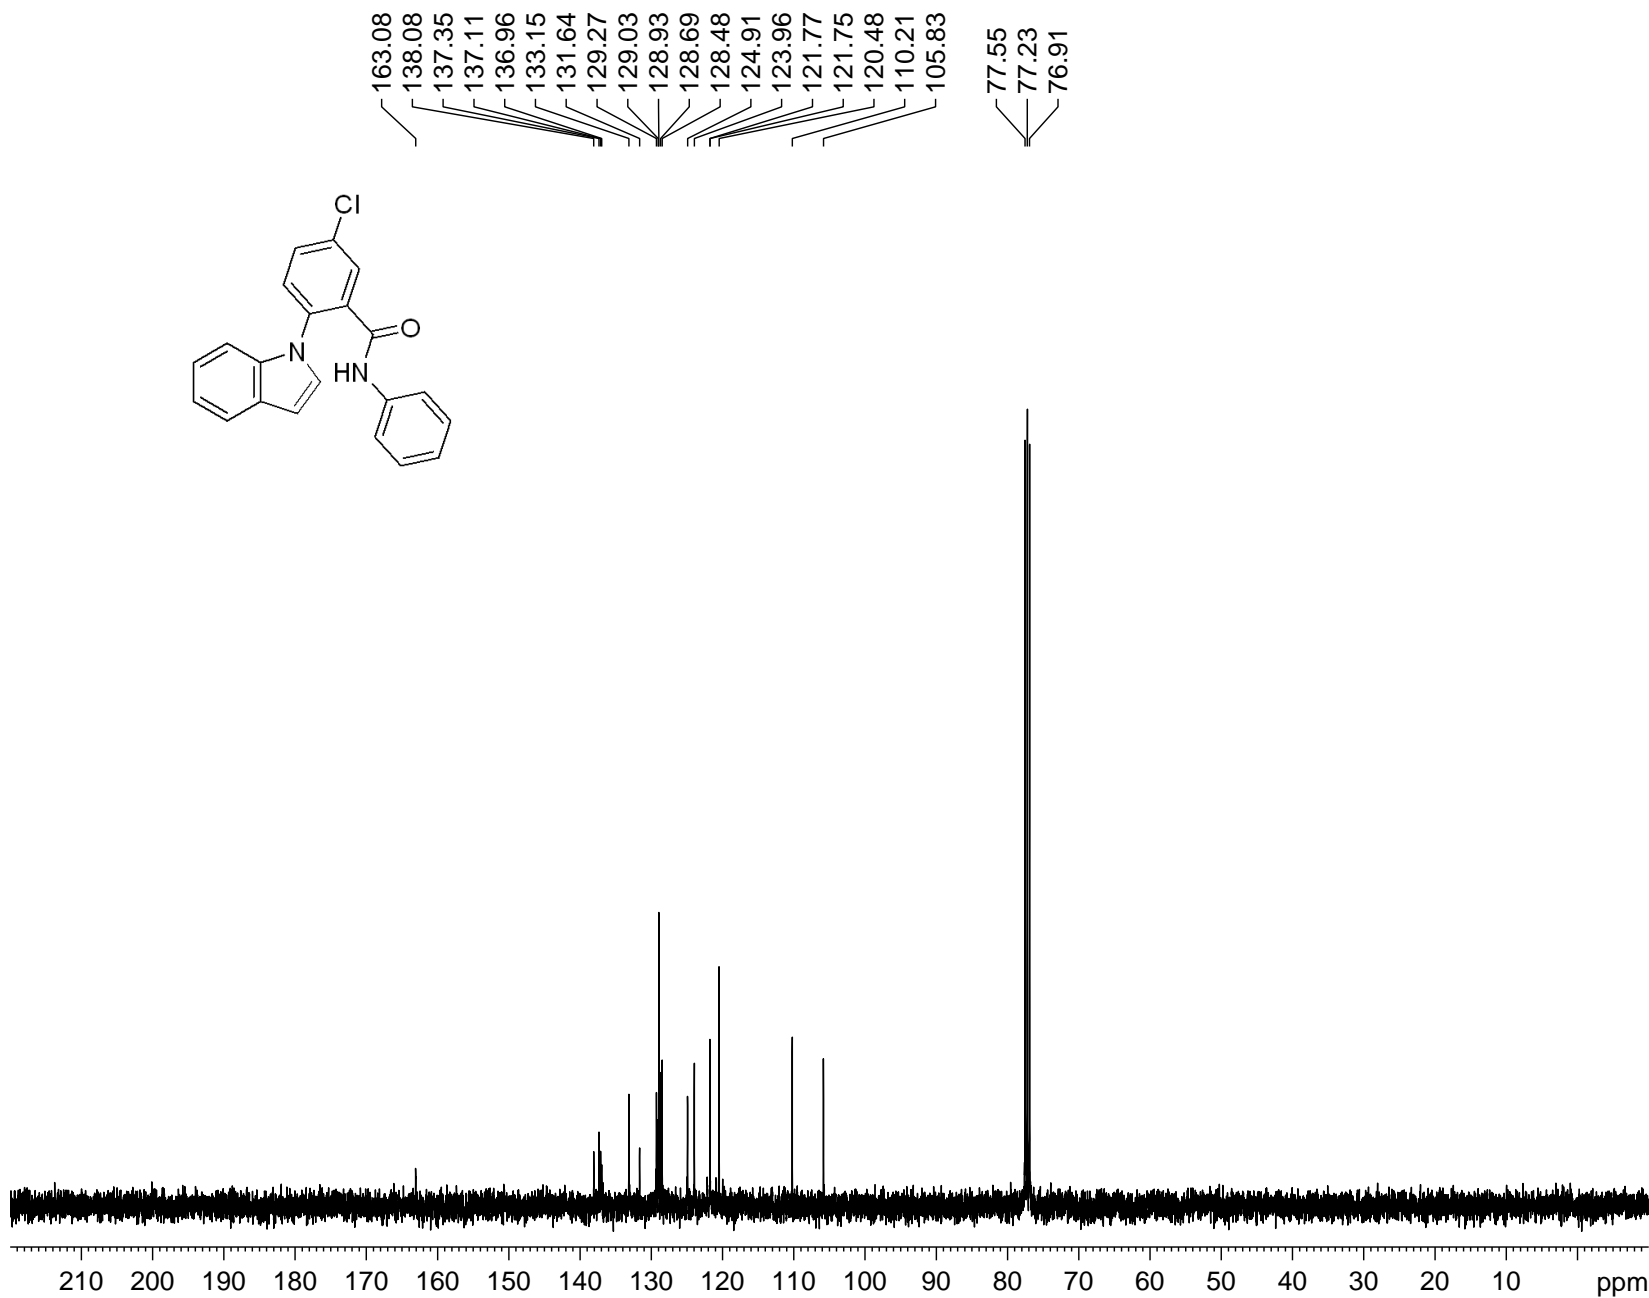

Current Data Parameters

NAME Trimurthulu  
EXPNO 160  
PROCNO 1

F2 - Acquisition Parameters

Date\_ 20120915  
Time 20.10  
INSTRUM spect  
PROBHD 5 mm BBO BB-1H  
PULPROG zgpg30  
TD 32768  
SOLVENT CDCl3  
NS 156  
DS 0  
SWH 24038.461 Hz  
FIDRES 0.733596 Hz  
AQ 0.6816452 sec  
RG 32768  
DW 20.800 usec  
DE 6.50 usec  
TE 299.4 K  
D1 2.00000000 sec  
D11 0.03000000 sec  
TD0 1

===== CHANNEL f1 =====

NUC1 13C  
P1 8.90 usec  
PL1 7.00 dB  
SFO1 100.6233325 MHz

===== CHANNEL f2 =====

CPDPRG2 waltz16  
NUC2 1H  
PCPD2 90.00 usec  
PL2 3.80 dB  
PL12 21.60 dB  
PL13 24.60 dB  
SFO2 400.1316005 MHz

F2 - Processing parameters

SI 32768  
SF 100.6127491 MHz  
WDW EM  
SSB 0  
LB 1.00 Hz  
GB 0  
PC 1.00

<sup>1</sup>H di methoxy-starting material

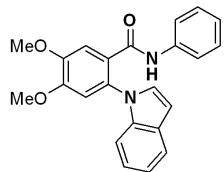

7.7772  
7.7618  
7.2828  
7.2734  
7.2601  
7.2446  
7.2376  
7.1424  
7.1229  
7.1034  
6.9910  
6.9726  
6.9541  
6.8971  
6.8740  
6.8440  
6.8243  
6.8061  
6.7983

4.0533  
3.9276

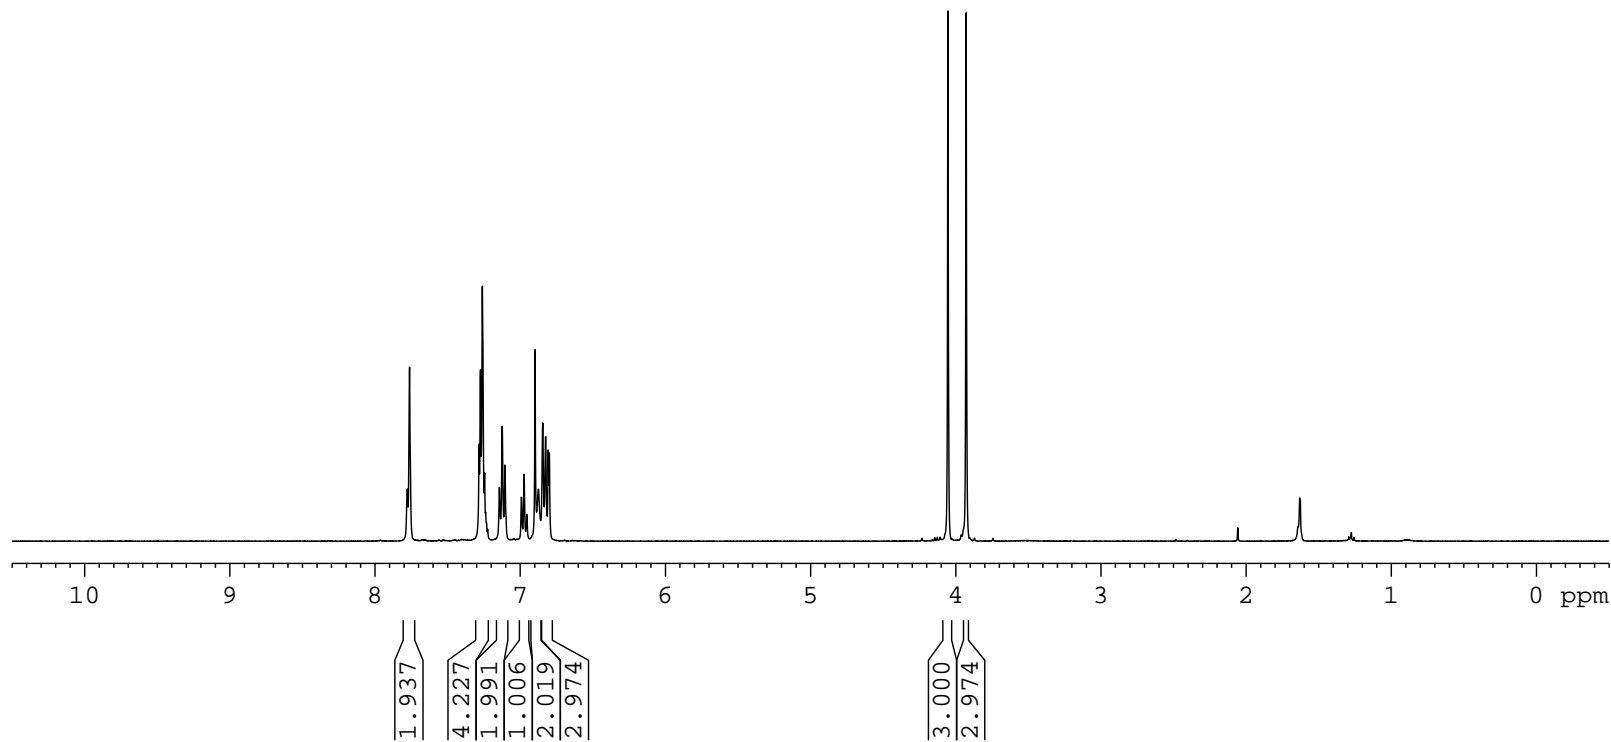

Current Data Parameters  
NAME Trimurthulu  
EXPNO 39  
PROCNO 1

F2 - Acquisition Parameters  
Date\_ 20120510  
Time 18.50  
INSTRUM spect  
PROBHD 5 mm BBO BB-1H  
PULPROG zg30  
TD 32768  
SOLVENT CDCl3  
NS 16  
DS 0  
SWH 7246.377 Hz  
FIDRES 0.221142 Hz  
AQ 2.2611110 sec  
RG 114  
DW 69.000 usec  
DE 6.50 usec  
TE 299.2 K  
D1 2.0000000 sec  
TD0 1

===== CHANNEL f1 =====  
NUC1 1H  
P1 11.70 usec  
PL1 4.00 dB  
SFO1 400.1324008 MHz

F2 - Processing parameters  
SI 16384  
SF 400.1300035 MHz  
WDW EM  
SSB 0  
LB 0 Hz  
GB 0  
PC 1.00

13C

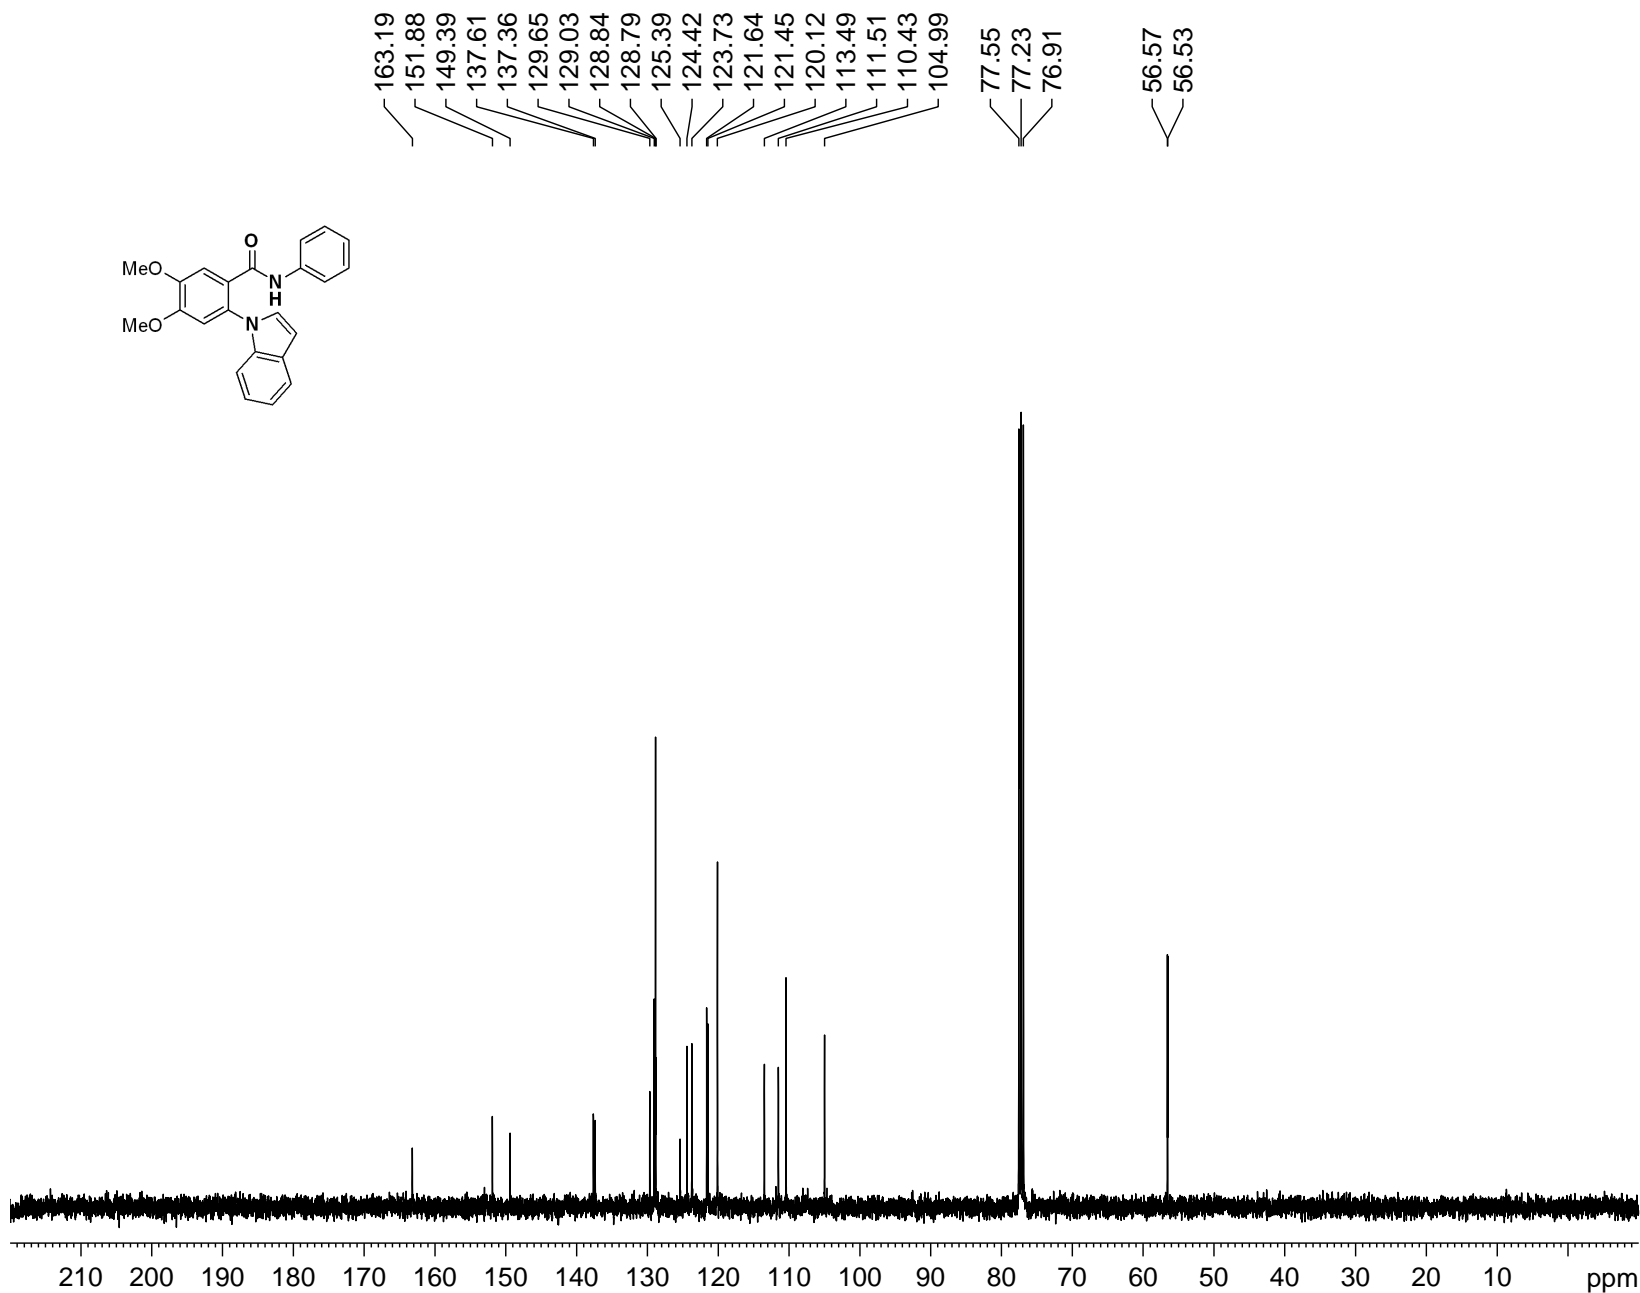

Current Data Parameters

NAME Trimurthulu  
EXPNO 40  
PROCNO 1

F2 - Acquisition Parameters

Date\_ 20120510  
Time 19.08  
INSTRUM spect  
PROBHD 5 mm BBO BB-1H  
PULPROG zgpg30  
TD 32768  
SOLVENT CDCl3  
NS 245  
DS 0  
SWH 24038.461 Hz  
FIDRES 0.733596 Hz  
AQ 0.6816452 sec  
RG 32768  
DW 20.800 usec  
DE 6.50 usec  
TE 299.8 K  
D1 2.0000000 sec  
D11 0.03000000 sec  
TD0 1

==== CHANNEL f1 =====

NUC1 13C  
P1 8.90 usec  
PL1 7.00 dB  
SFO1 100.6233325 MHz

==== CHANNEL f2 =====

CPDPRG2 waltz16  
NUC2 1H  
PCPD2 90.00 usec  
PL2 3.80 dB  
PL12 21.60 dB  
PL13 24.60 dB  
SFO2 400.1316005 MHz

F2 - Processing parameters

SI 32768  
SF 100.6127507 MHz  
WDW EM  
SSB 0  
LB 1.00 Hz  
GB 0  
PC 1.00

<sup>1</sup>H

8.0924  
8.0715  
7.7403  
7.7233  
7.5798  
7.5587  
7.5117  
7.5082  
7.2940  
7.2759  
7.2600  
7.2442  
7.2319  
7.2161  
7.1489  
7.1297  
7.1103  
7.0149  
6.9965  
6.9782  
6.8583  
6.8386  
6.7892  
6.7816  
5.2915

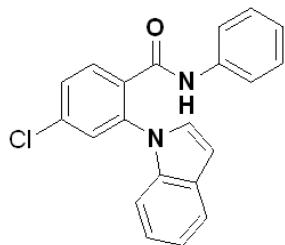

Current Data Parameters  
NAME Trimurthulu  
EXPNO 37  
PROCNO 1

F2 - Acquisition Parameters  
Date\_ 20120510  
Time 18.38  
INSTRUM spect  
PROBHD 5 mm BBO BB-1H  
PULPROG zg30  
TD 32768  
SOLVENT CDCl3  
NS 16  
DS 0  
SWH 7246.377 Hz  
FIDRES 0.221142 Hz  
AQ 2.2611110 sec  
RG 90.5  
DW 69.000 usec  
DE 6.50 usec  
TE 299.2 K  
D1 2.0000000 sec  
TD0 1

===== CHANNEL f1 =====  
NUC1 1H  
P1 11.70 usec  
PL1 4.00 dB  
SFO1 400.1324008 MHz

F2 - Processing parameters  
SI 16384  
SF 400.1300085 MHz  
WDW EM  
SSB 0  
LB 0 Hz  
GB 0  
PC 1.00

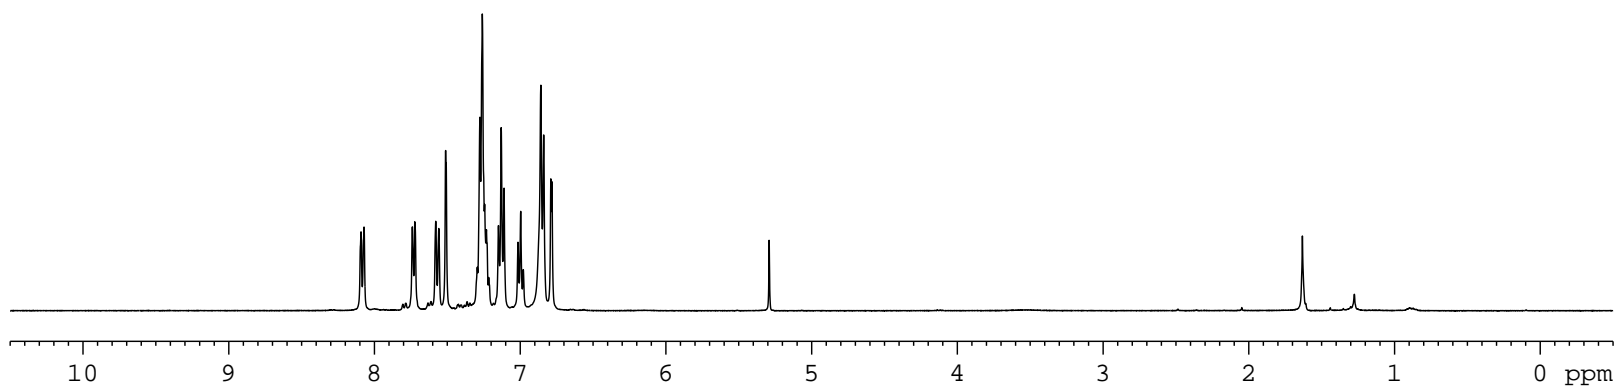

1.000  
0.999  
1.024  
0.994  
4.293  
2.048  
1.077  
2.950  
1.066

13C

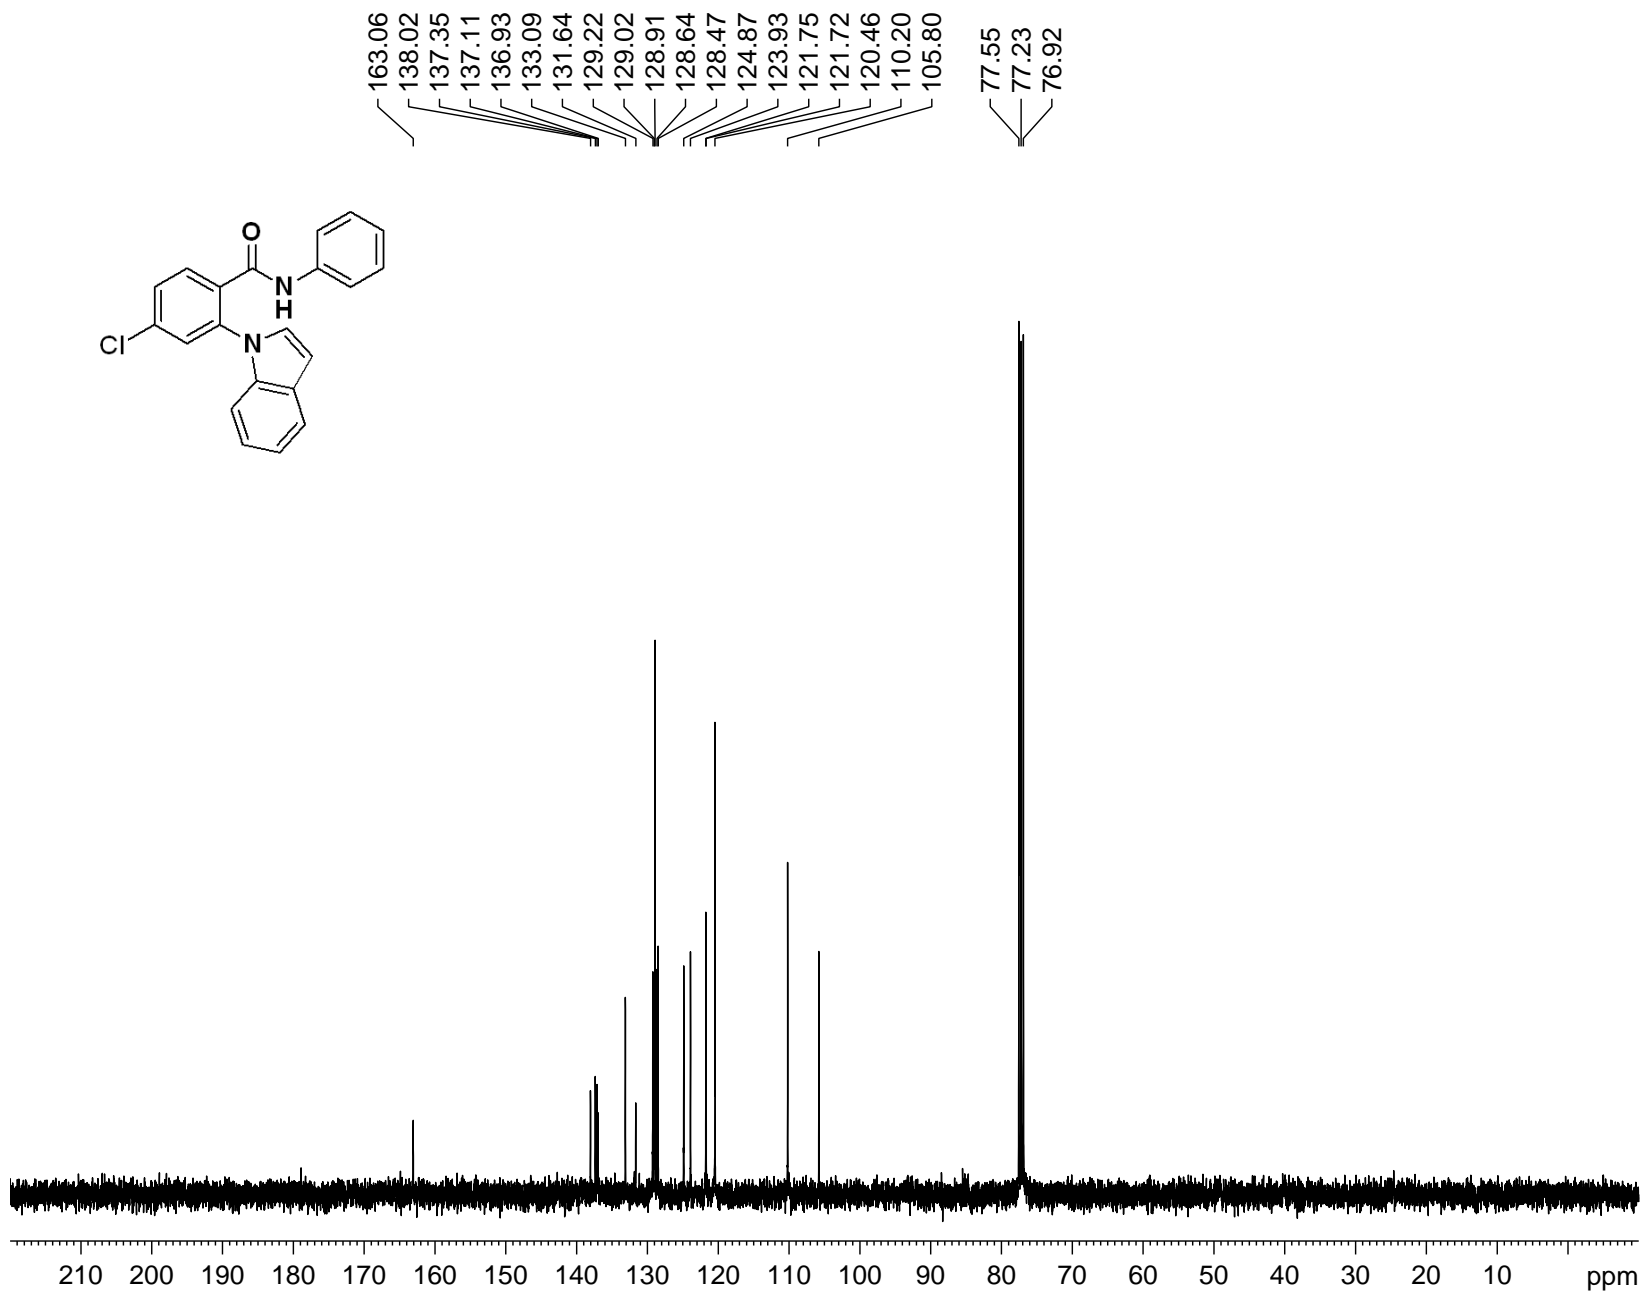

Current Data Parameters

NAME Trimurthulu  
EXPNO 38  
PROCNO 1

F2 - Acquisition Parameters

Date\_ 20120510  
Time 18.45  
INSTRUM spect  
PROBHD 5 mm BBO BB-1H  
PULPROG zgpg30  
TD 32768  
SOLVENT CDCl3  
NS 128  
DS 0  
SWH 24038.461 Hz  
FIDRES 0.733596 Hz  
AQ 0.6816452 sec  
RG 32768  
DW 20.800 usec  
DE 6.50 usec  
TE 299.7 K  
D1 2.00000000 sec  
D11 0.03000000 sec  
TD0 1

==== CHANNEL f1 =====

NUC1 13C  
P1 8.90 usec  
PL1 7.00 dB  
SFO1 100.6233325 MHz

==== CHANNEL f2 =====

CPDPRG2 waltz16  
NUC2 1H  
PCPD2 90.00 usec  
PL2 3.80 dB  
PL12 21.60 dB  
PL13 24.60 dB  
SFO2 400.1316005 MHz

F2 - Processing parameters

SI 32768  
SF 100.6127514 MHz  
WDW EM  
SSB 0  
LB 1.00 Hz  
GB 0  
PC 1.00

dimethoxy 5-benzyloxy

7.7348  
 7.4861  
 7.4825  
 7.4648  
 7.4135  
 7.4104  
 7.3929  
 7.3892  
 7.3739  
 7.3472  
 7.3294  
 7.2699  
 7.2639  
 7.2602  
 7.2318  
 7.2239  
 7.1502  
 7.1280  
 7.1076  
 6.9990  
 6.9931  
 6.9807  
 6.9771  
 6.9707  
 6.9047  
 6.8887  
 6.8642  
 6.6967  
 6.6891  
 5.1389  
 4.0273  
 3.9098

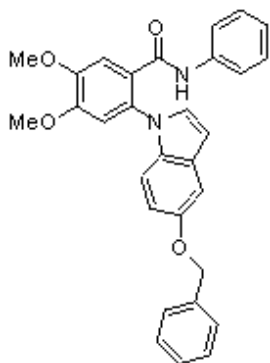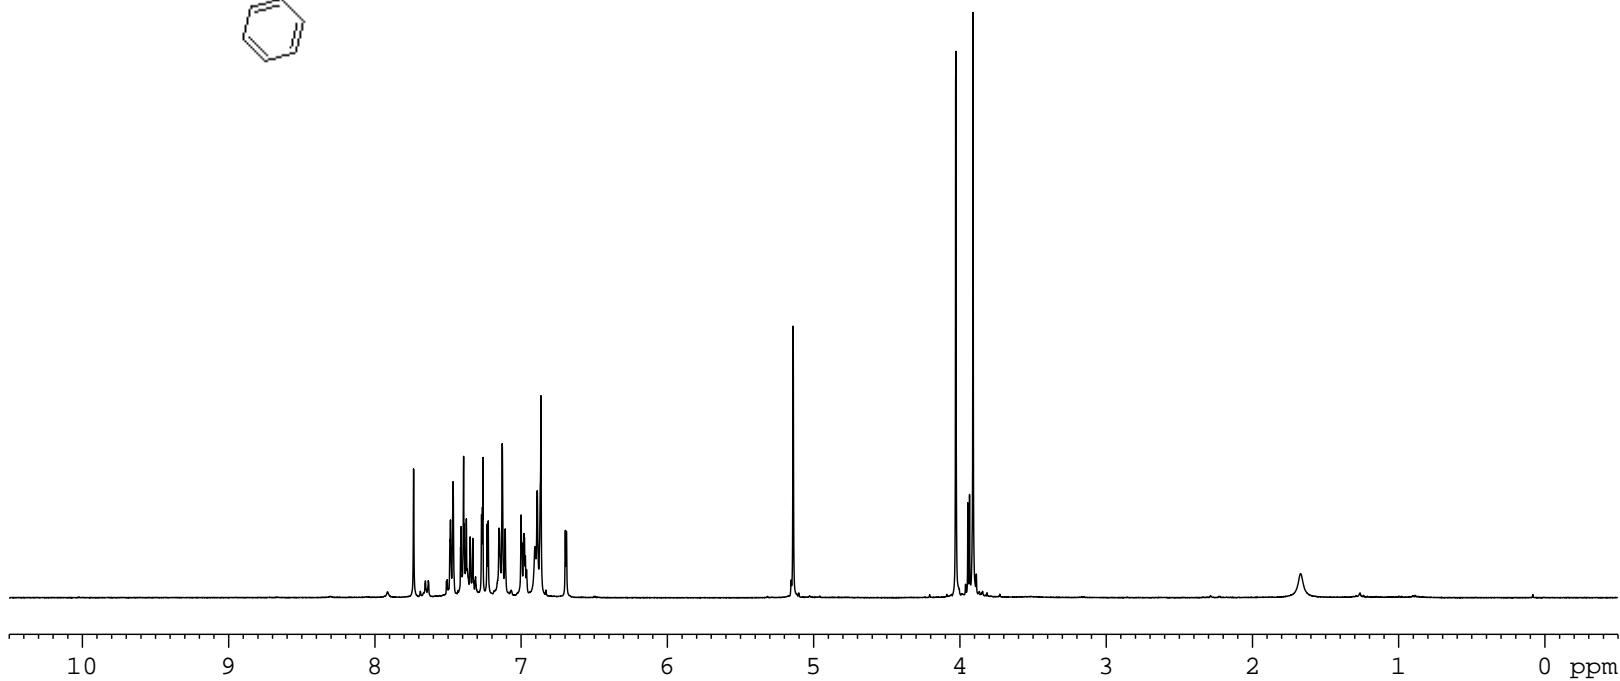

1.000  
 2.009  
 2.969  
 1.084  
 1.575  
 1.094  
 3.097  
 2.142  
 4.164  
 1.057  
 1.989  
 3.073  
 3.221

NAME Trimurthulu  
 EXPNO 282  
 PROCNO 1  
 Date\_ 20130511  
 Time 21.46  
 INSTRUM spect  
 PROBHD 5 mm BBO BB-1H  
 PULPROG zg30  
 TD 32768  
 SOLVENT CDCl3  
 NS 16  
 DS 0  
 SWH 7246.377 Hz  
 FIDRES 0.221142 Hz  
 AQ 2.2611110 sec  
 RG 114  
 DW 69.000 usec  
 DE 6.50 usec  
 TE 298.0 K  
 D1 2.0000000 sec  
 TD0 1

===== CHANNEL f1 =====  
 NUC1 1H  
 P1 11.90 usec  
 PL1 3.00 dB  
 SFO1 400.1324008 MHz  
 SI 16384  
 SF 400.1300091 MHz  
 WDW EM  
 SSB 0  
 LB 0.00 Hz  
 GB 0  
 PC 1.00

dimethoxy 5-benzyloxy

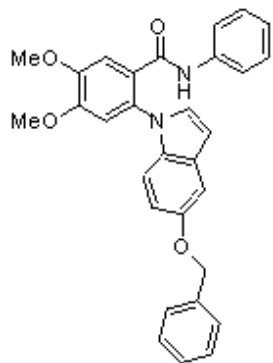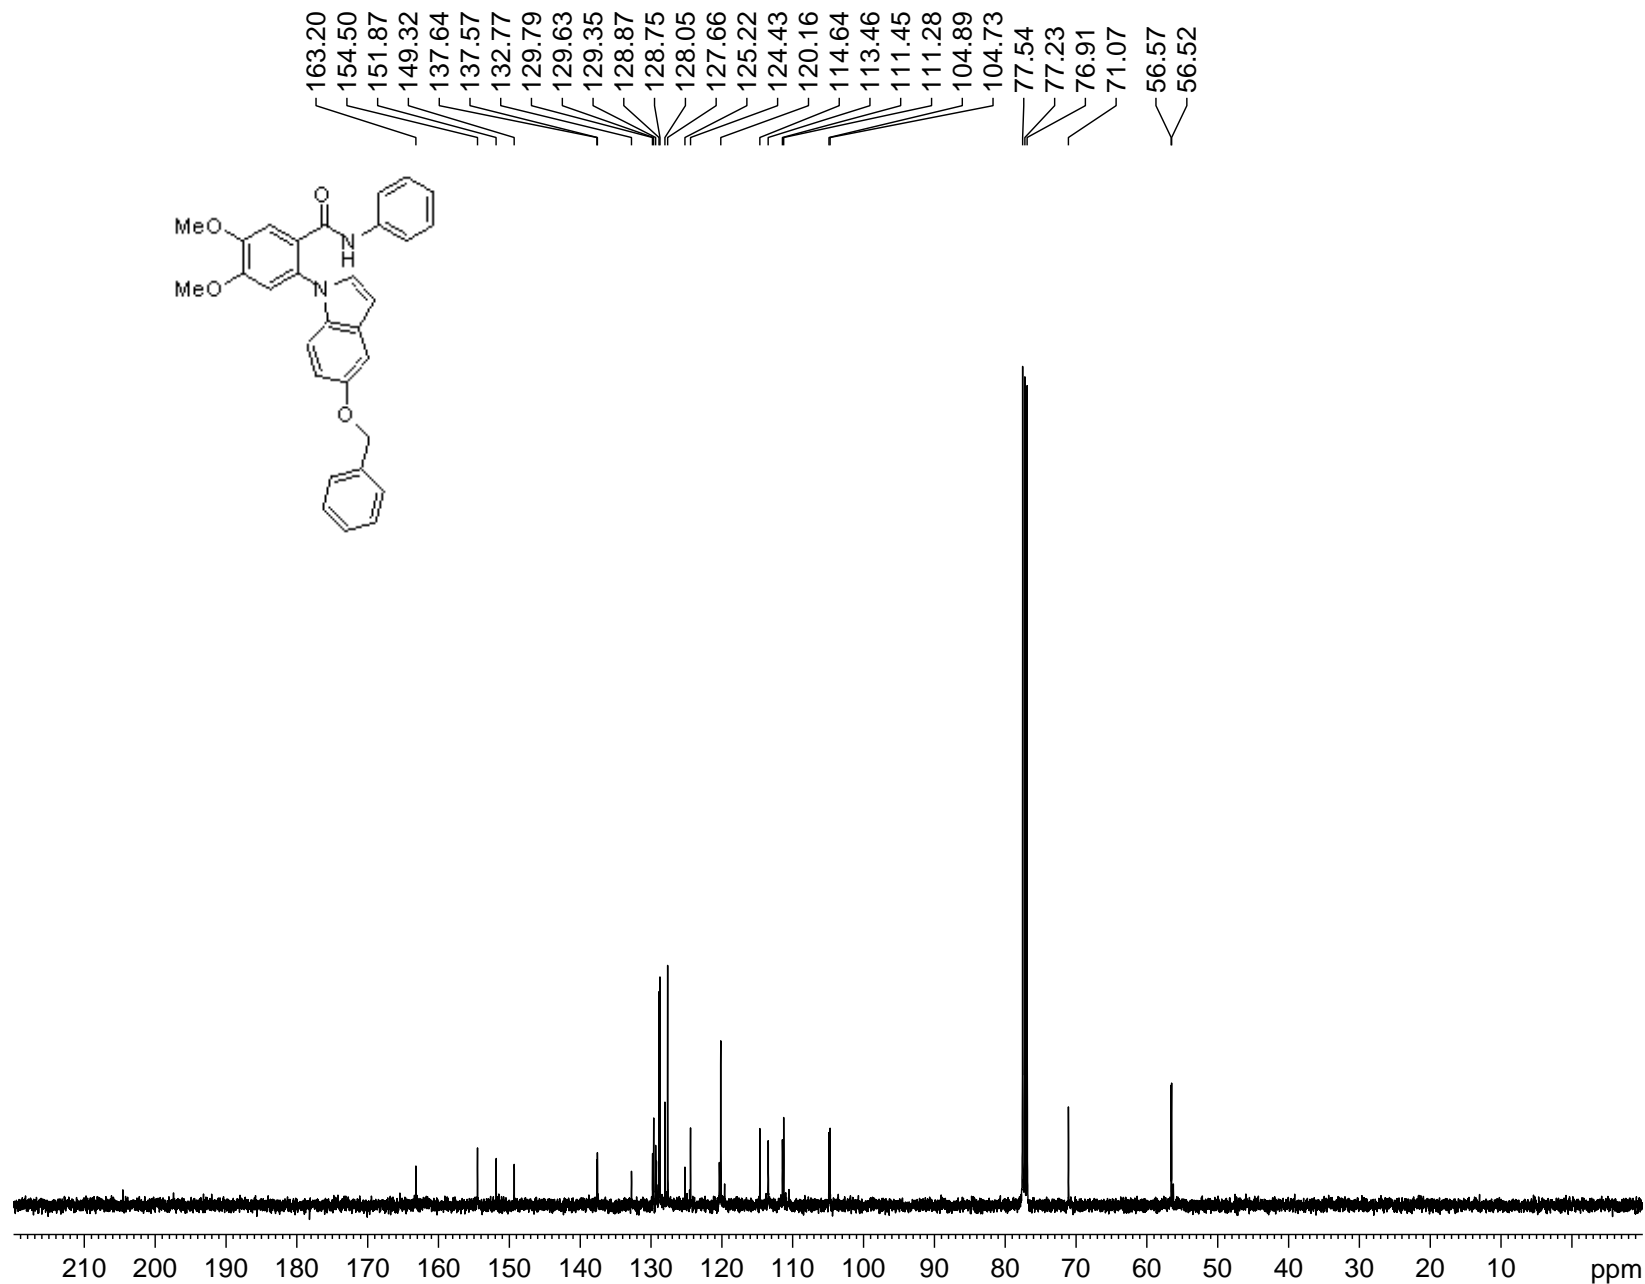

Current Data Parameters

NAME Trimurthulu  
EXPNO 283  
PROCNO 1

F2 - Acquisition Parameters

Date\_ 20130511  
Time 21.49  
INSTRUM spect  
PROBHD 5 mm BBO BB-1H  
PULPROG zgpg30  
TD 32768  
SOLVENT CDCl3  
NS 343  
DS 0  
SWH 24038.461 Hz  
FIDRES 0.733596 Hz  
AQ 0.6816452 sec  
RG 32768  
DW 20.800 usec  
DE 6.50 usec  
TE 298.2 K  
D1 2.0000000 sec  
D11 0.03000000 sec  
TD0 1

===== CHANNEL f1 =====

NUC1 13C  
P1 9.40 usec  
PL1 7.00 dB  
SFO1 100.6233325 MHz

===== CHANNEL f2 =====

CPDPRG2 waltz16  
NUC2 1H  
PCPD2 90.00 usec  
PL2 3.00 dB  
PL12 20.70 dB  
PL13 23.70 dB  
SFO2 400.1316005 MHz

F2 - Processing parameters

SI 32768  
SF 100.6127513 MHz  
WDW EM  
SSB 0  
LB 1.00 Hz  
GB 0  
PC 1.00



1H of m- nitro SMI

8.9536  
8.9471  
8.4969  
8.4902  
8.4752  
8.4686  
7.7393  
7.7269  
7.7177  
7.3393  
7.3205  
7.3142  
7.3057  
7.2841  
7.2704  
7.2658  
7.2602  
7.2521  
7.2489  
7.2347  
7.1940  
7.1747  
7.1550  
7.0664  
7.0480  
7.0295  
6.9325  
6.9127  
6.8356  
6.8274

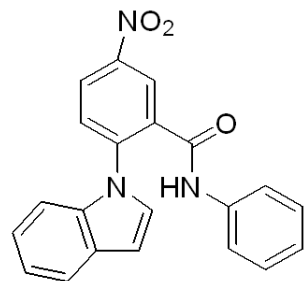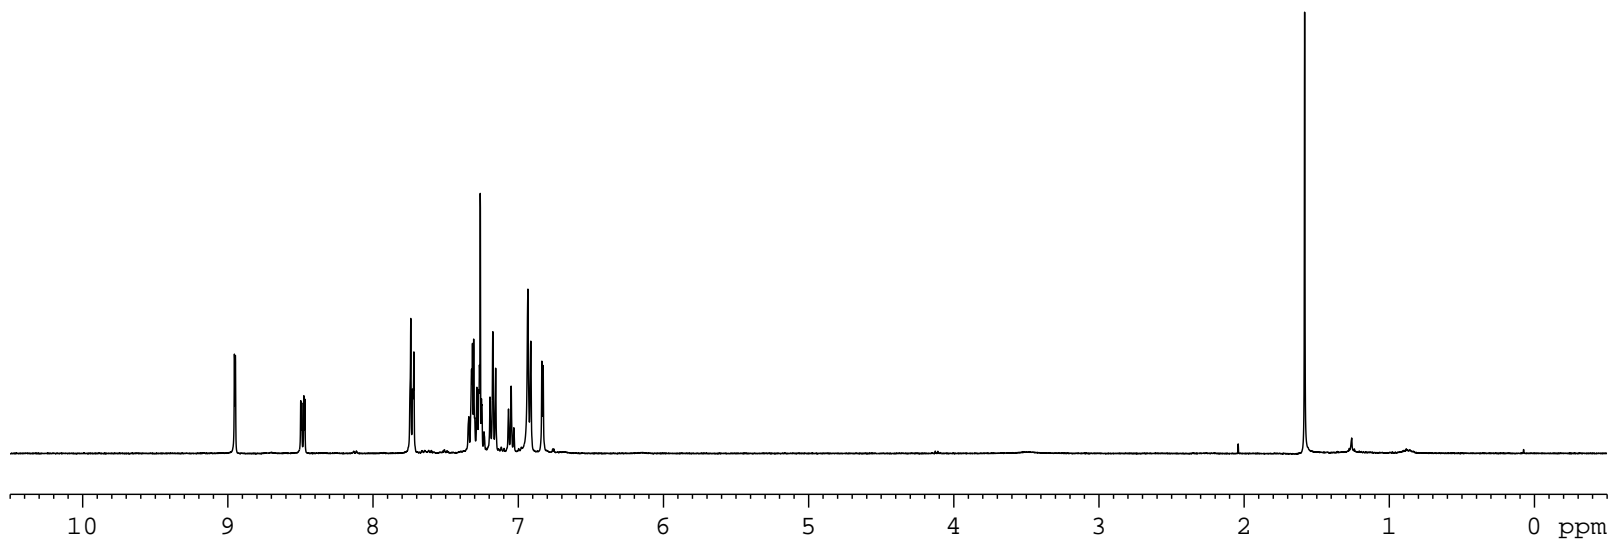

1.000  
1.072  
2.193  
0.379  
2.158  
3.059  
2.272  
1.166  
3.130  
1.202

Current Data Parameters  
NAME Trimurthulu  
EXPNO 360  
PROCNO 1

F2 - Acquisition Parameters  
Date\_ 20131006  
Time 15.14  
INSTRUM spect  
PROBHD 5 mm BBO BB-1H  
PULPROG zg30  
TD 32768  
SOLVENT CDCl3  
NS 16  
DS 0  
SWH 7246.377 Hz  
FIDRES 0.221142 Hz  
AQ 2.2611110 sec  
RG 256  
DW 69.000 usec  
DE 6.50 usec  
TE 299.1 K  
D1 2.00000000 sec  
TD0 1

===== CHANNEL f1 =====  
NUC1 1H  
P1 11.90 usec  
PL1 3.00 dB  
SFO1 400.1324008 MHz

F2 - Processing parameters  
SI 16384  
SF 400.1300093 MHz  
WDW EM  
SSB 0  
LB 0 Hz  
GB 0  
PC 1.00

<sup>13</sup>C of m- nitro SMI

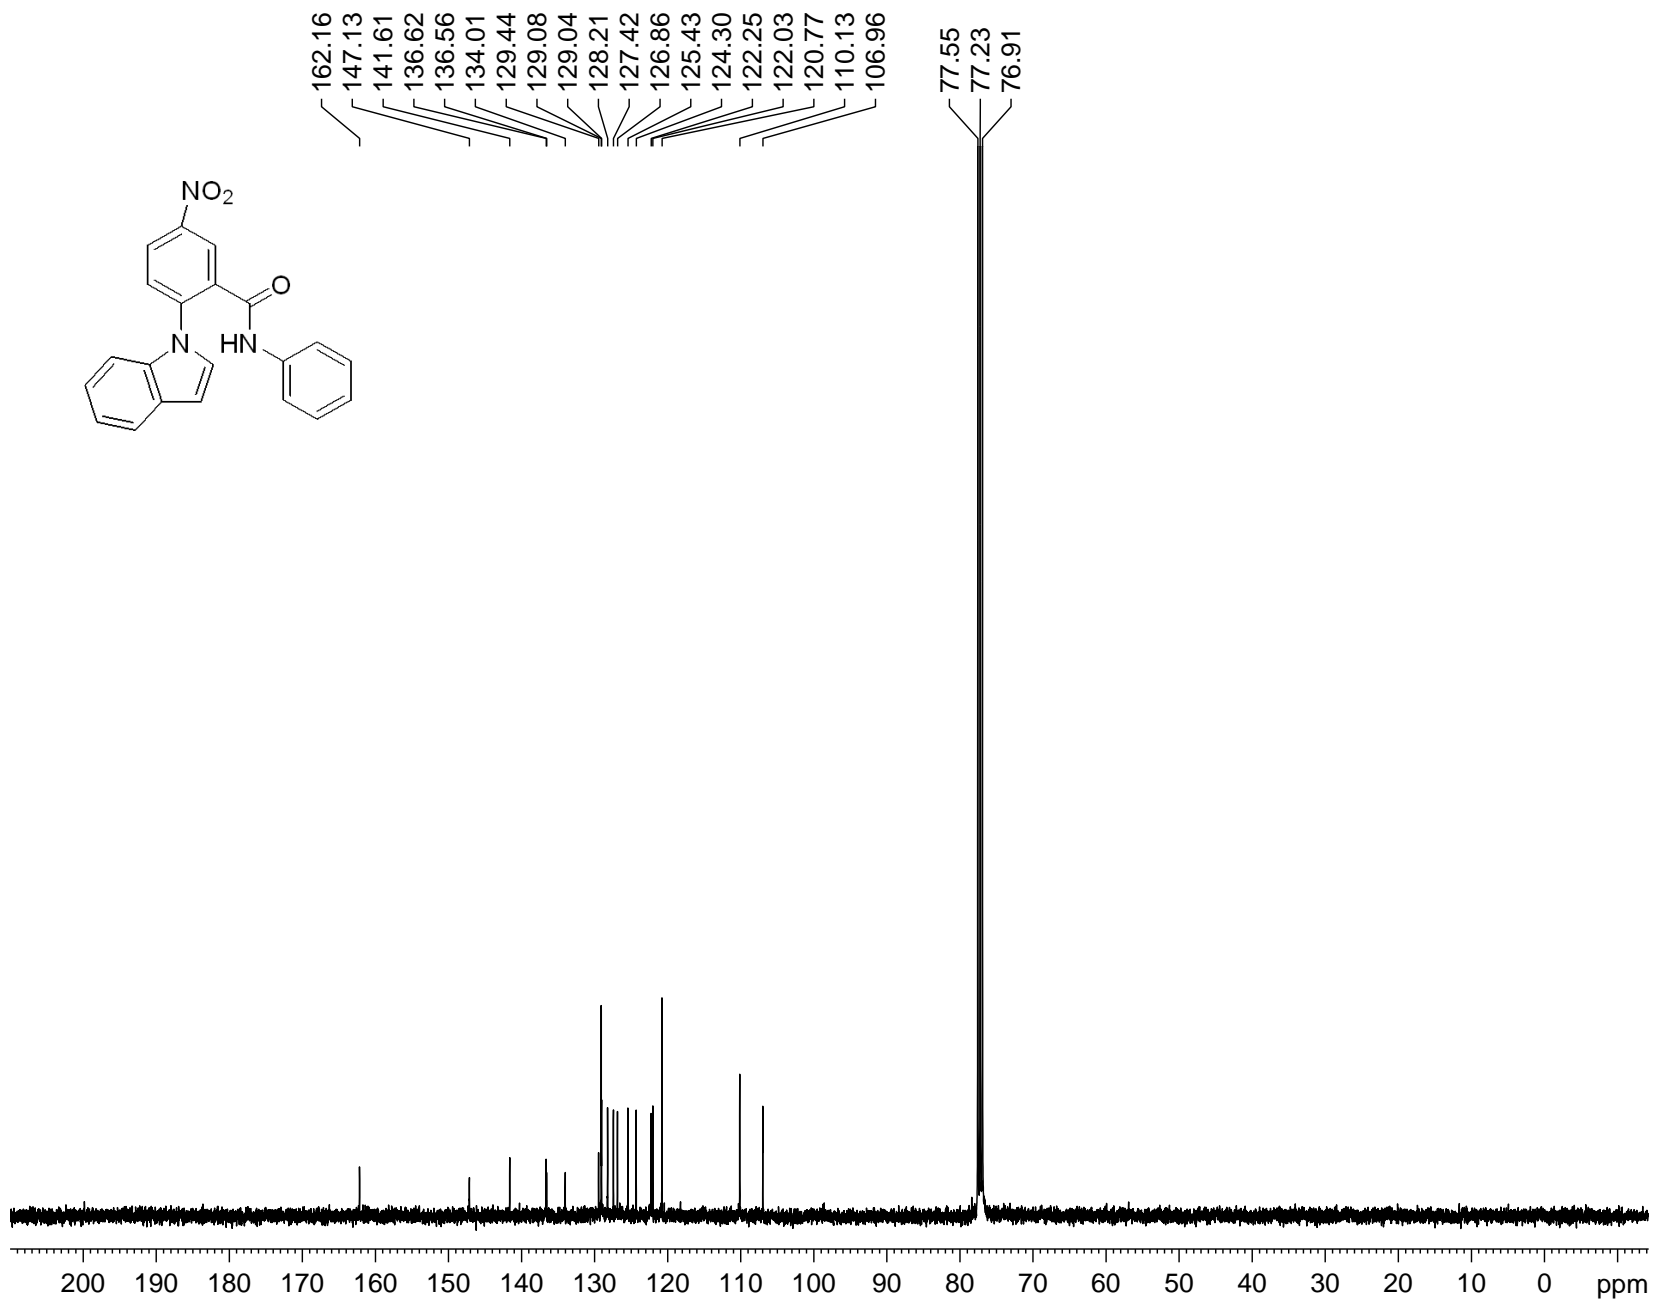

Current Data Parameters

NAME Trimurthulu  
EXPNO 361  
PROCNO 1

F2 - Acquisition Parameters

Date\_ 20131006  
Time 15.17  
INSTRUM spect  
PROBHD 5 mm BBO BB-1H  
PULPROG zgpg30  
TD 32768  
SOLVENT CDCl3  
NS 872  
DS 0  
SWH 24038.461 Hz  
FIDRES 0.733596 Hz  
AQ 0.6816452 sec  
RG 8192  
DW 20.800 usec  
DE 6.50 usec  
TE 299.2 K  
D1 2.00000000 sec  
D11 0.03000000 sec  
TD0 1

===== CHANNEL f1 =====

NUC1 13C  
P1 9.40 usec  
PL1 7.00 dB  
SFO1 100.6233325 MHz

===== CHANNEL f2 =====

CPDPRG2 waltz16  
NUC2 1H  
PCPD2 90.00 usec  
PL2 3.00 dB  
PL12 20.70 dB  
PL13 23.70 dB  
SFO2 400.1316005 MHz

F2 - Processing parameters

SI 32768  
SF 100.6127485 MHz  
WDW EM  
SSB 0  
LB 1.00 Hz  
GB 0  
PC 1.00

1Hof 3- me indole sm

7.9339  
7.6363  
7.6298  
7.6212  
7.6158  
7.5769  
7.5730  
7.5579  
7.5541  
7.5390  
7.5350  
7.4959  
7.4932  
7.4769  
7.4744  
7.4582  
7.4557  
7.4044  
7.4027  
7.3848  
7.3830  
7.2602  
7.2335  
7.2264  
7.2223  
7.2137  
7.2093  
7.1952  
7.1880  
7.1798  
7.1747  
7.1667  
7.0072  
7.0058  
5.2339

2.5163  
2.5040  
2.3820

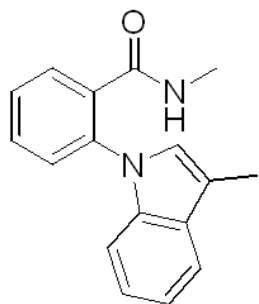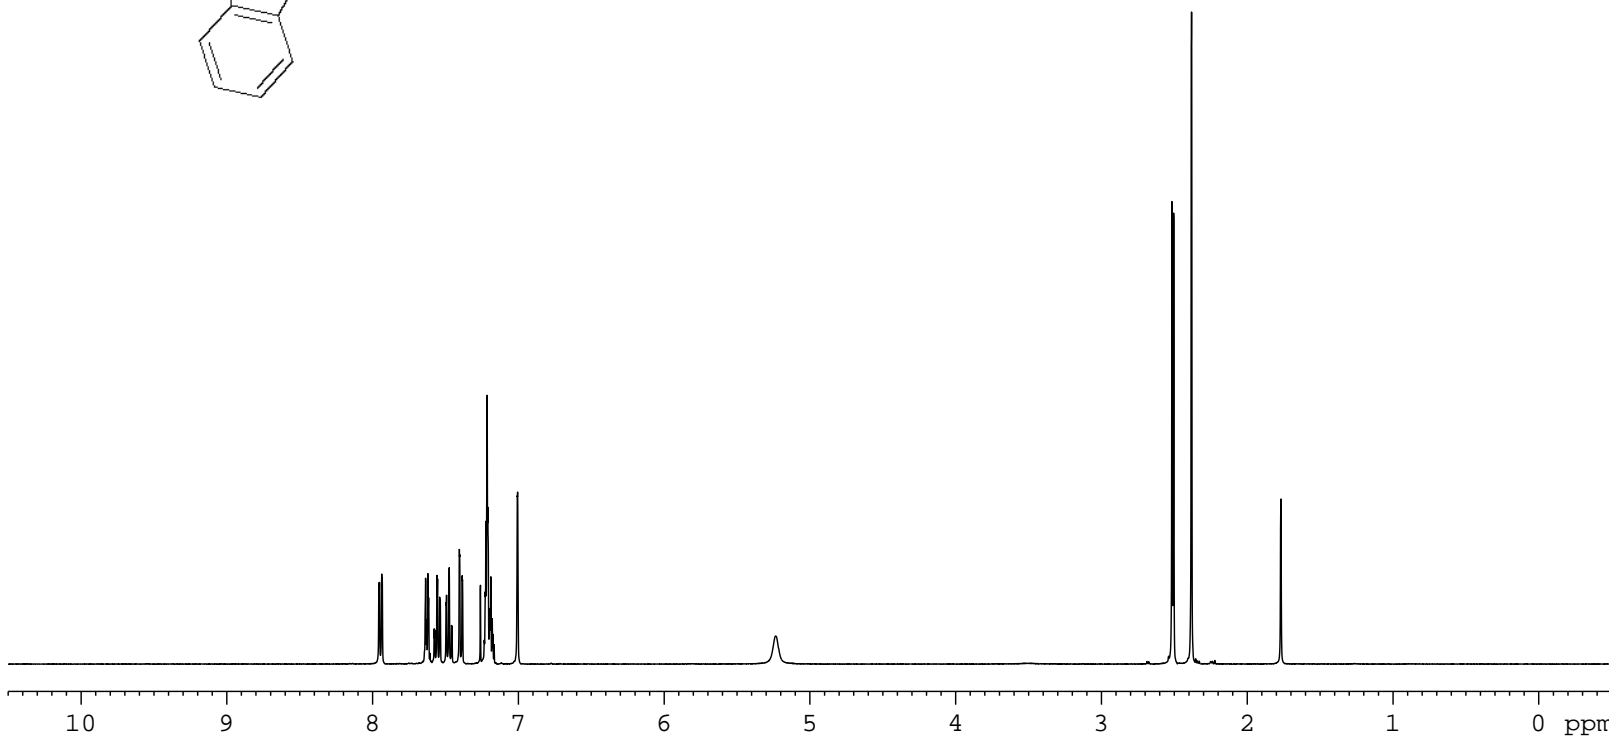

1.008  
0.981  
1.038  
1.015  
1.020  
3.039  
0.995

0.898

3.014  
2.996

Current Data Parameters  
NAME Trimurthulu  
EXPNO 364  
PROCNO 1

F2 - Acquisition Parameters  
Date\_ 20131006  
Time 17.22  
INSTRUM spect  
PROBHD 5 mm BBO BB-1H  
PULPROG zg30  
TD 32768  
SOLVENT CDCl3  
NS 16  
DS 0  
SWH 7246.377 Hz  
FIDRES 0.221142 Hz  
AQ 2.2611110 sec  
RG 114  
DW 69.000 usec  
DE 6.50 usec  
TE 299.1 K  
D1 2.00000000 sec  
TD0 1

===== CHANNEL f1 =====  
NUC1 1H  
P1 11.90 usec  
PL1 3.00 dB  
SFO1 400.1324008 MHz

F2 - Processing parameters  
SI 16384  
SF 400.1300092 MHz  
WDW EM  
SSB 0  
LB 0 Hz  
GB 0  
PC 1.00

1Hof 3- me indole sm

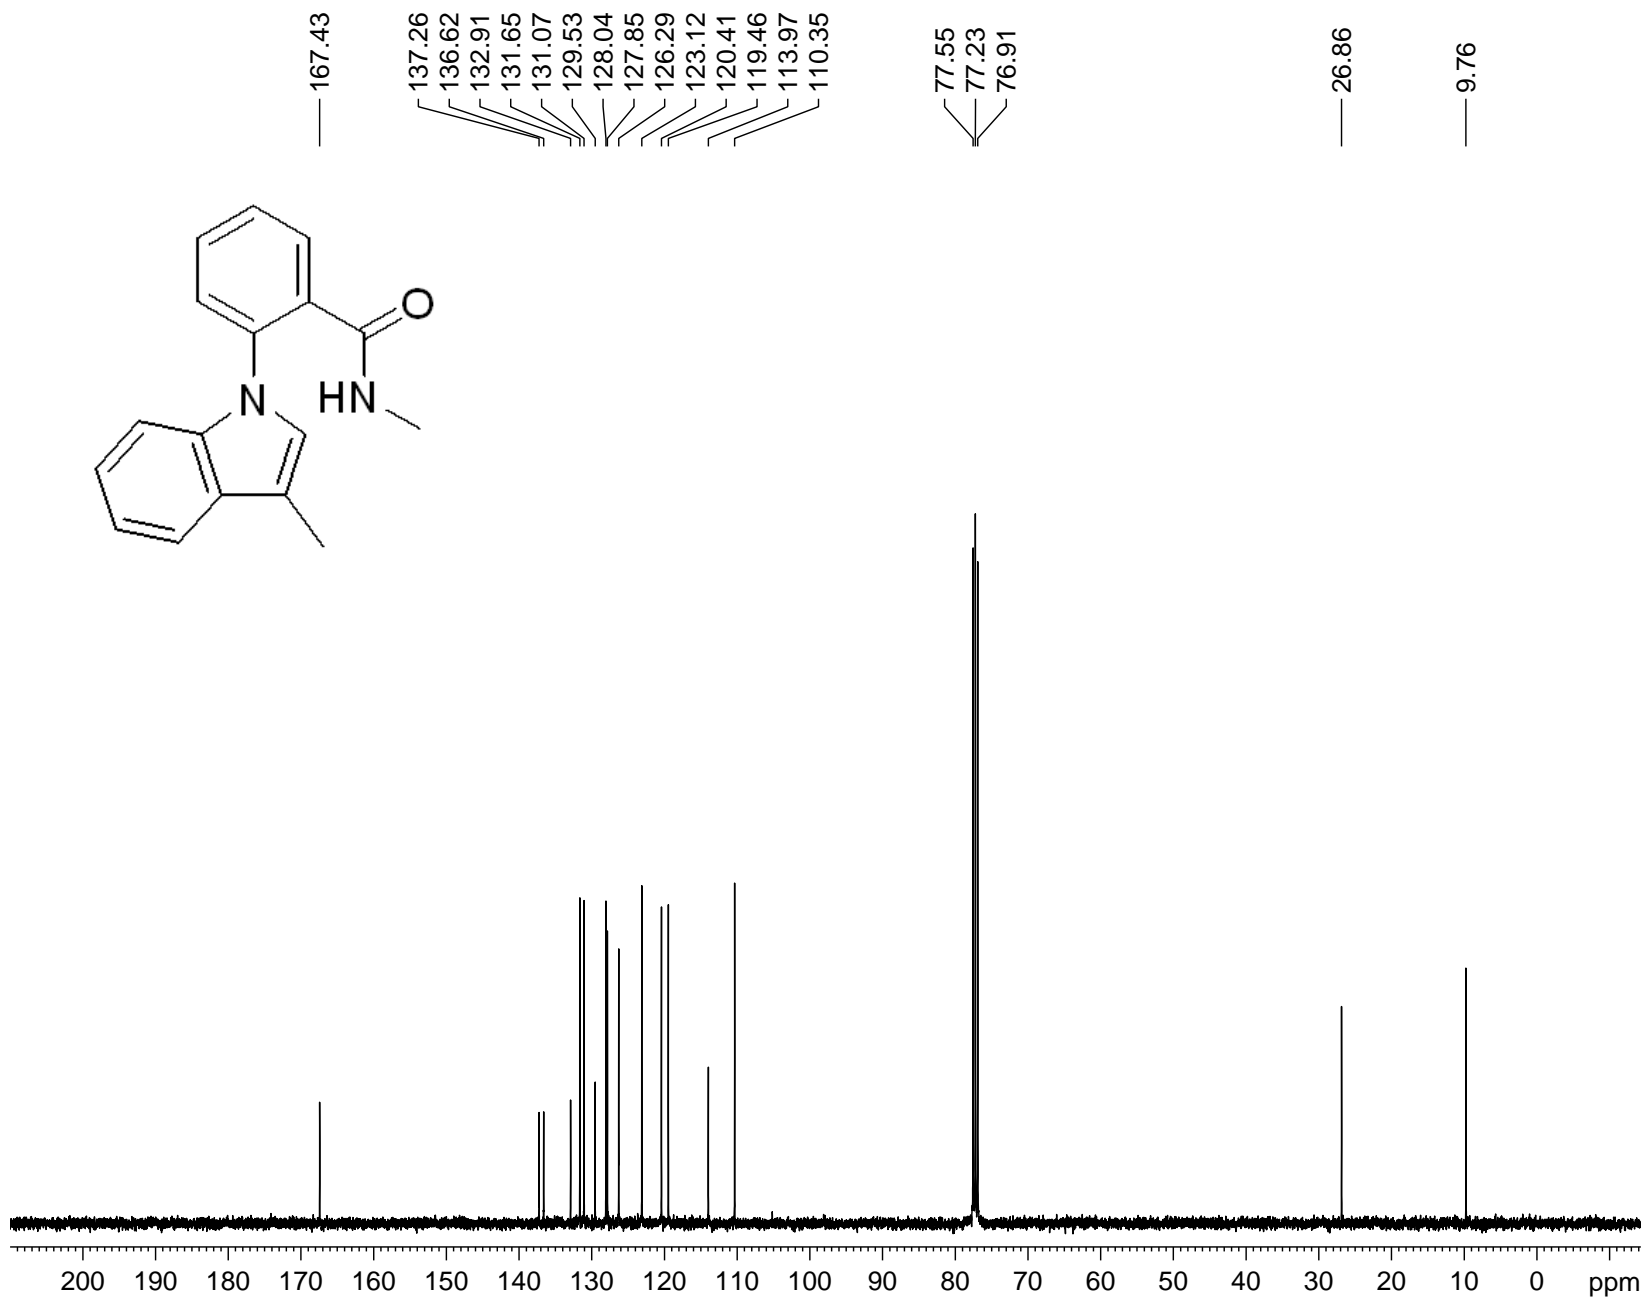

Current Data Parameters

NAME Trimurthulu  
EXPNO 365  
PROCNO 1

F2 - Acquisition Parameters

Date\_ 20131006  
Time 17.24  
INSTRUM spect  
PROBHD 5 mm BBO BB-1H  
PULPROG zgpg30  
TD 32768  
SOLVENT CDCl3  
NS 674  
DS 0  
SWH 24038.461 Hz  
FIDRES 0.733596 Hz  
AQ 0.6816452 sec  
RG 8192  
DW 20.800 usec  
DE 6.50 usec  
TE 299.1 K  
D1 2.00000000 sec  
D11 0.03000000 sec  
TD0 1

===== CHANNEL f1 =====

NUC1 13C  
P1 9.40 usec  
PL1 7.00 dB  
SFO1 100.6233325 MHz

===== CHANNEL f2 =====

CPDPRG2 waltz16  
NUC2 1H  
PCPD2 90.00 usec  
PL2 3.00 dB  
PL12 20.70 dB  
PL13 23.70 dB  
SFO2 400.1316005 MHz

F2 - Processing parameters

SI 32768  
SF 100.6127507 MHz  
WDW EM  
SSB 0  
LB 1.00 Hz  
GB 0  
PC 1.00

1H N-CH3 final compound

8.4129  
8.3933  
8.2783  
8.2724  
8.2572  
8.2513  
8.1005  
8.0850  
8.0783  
7.7831  
7.7628  
7.7441  
7.6471  
7.6385  
7.6341  
7.6279  
7.3669  
7.3477  
7.3295  
7.3280  
7.3146  
7.3038  
7.2973  
7.2934  
7.2900  
7.2832  
7.2600  
6.0574  
6.0524

3.6266  
3.6214

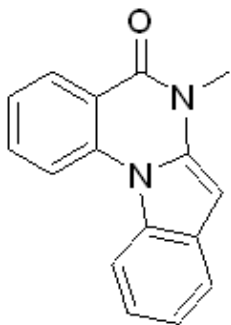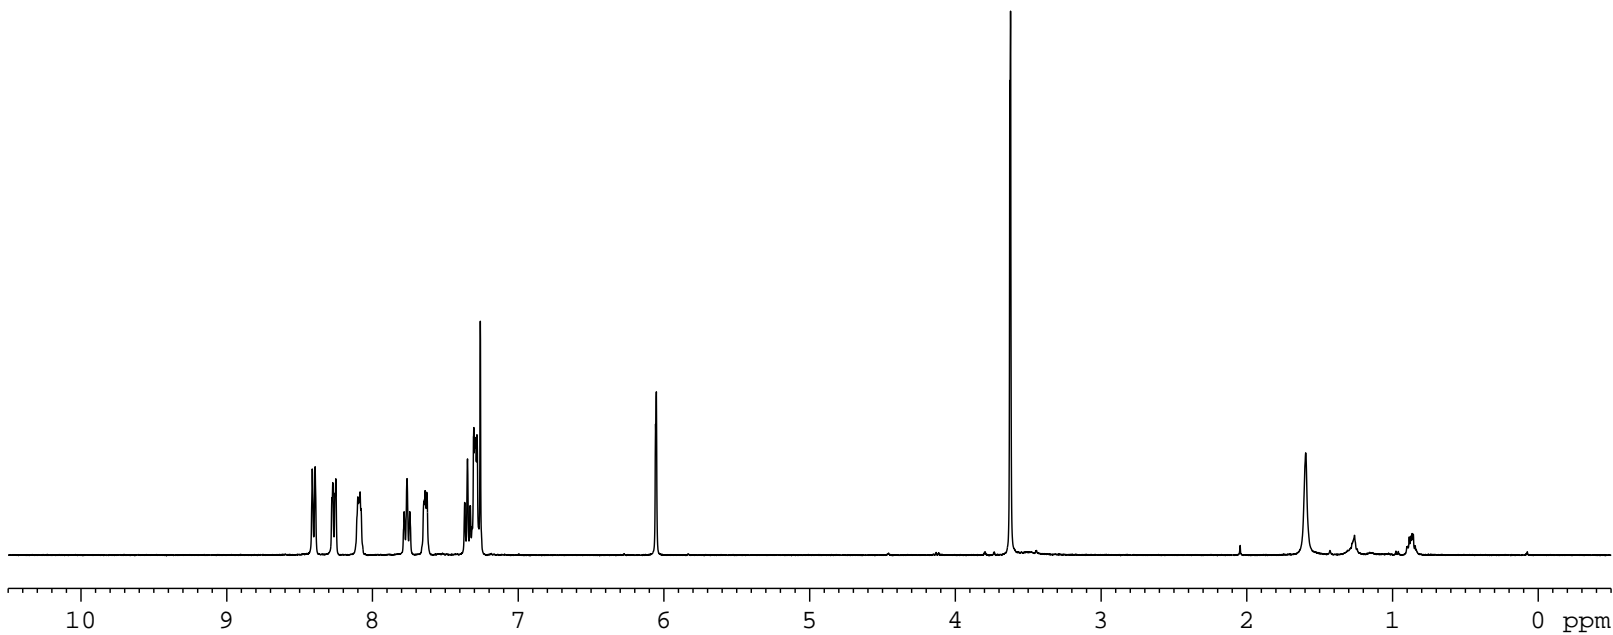

1.000  
1.035  
1.039  
1.006  
0.986  
1.076  
2.063

0.986

3.092

Current Data Parameters  
NAME Trimurthulu  
EXPNO 49  
PROCNO 1

F2 - Acquisition Parameters  
Date\_ 20120511  
Time 18.55  
INSTRUM spect  
PROBHD 5 mm BBO BB-1H  
PULPROG zg30  
TD 32768  
SOLVENT CDCl3  
NS 16  
DS 0  
SWH 7246.377 Hz  
FIDRES 0.221142 Hz  
AQ 2.2611110 sec  
RG 181  
DW 69.000 usec  
DE 6.50 usec  
TE 299.0 K  
D1 2.00000000 sec  
TD0 1

===== CHANNEL f1 =====  
NUC1 1H  
P1 11.70 usec  
PL1 4.00 dB  
SFO1 400.1324008 MHz

F2 - Processing parameters  
SI 16384  
SF 400.1300086 MHz  
WDW EM  
SSB 0  
LB 0 Hz  
GB 0  
PC 1.00

<sup>13</sup>C of N- me final

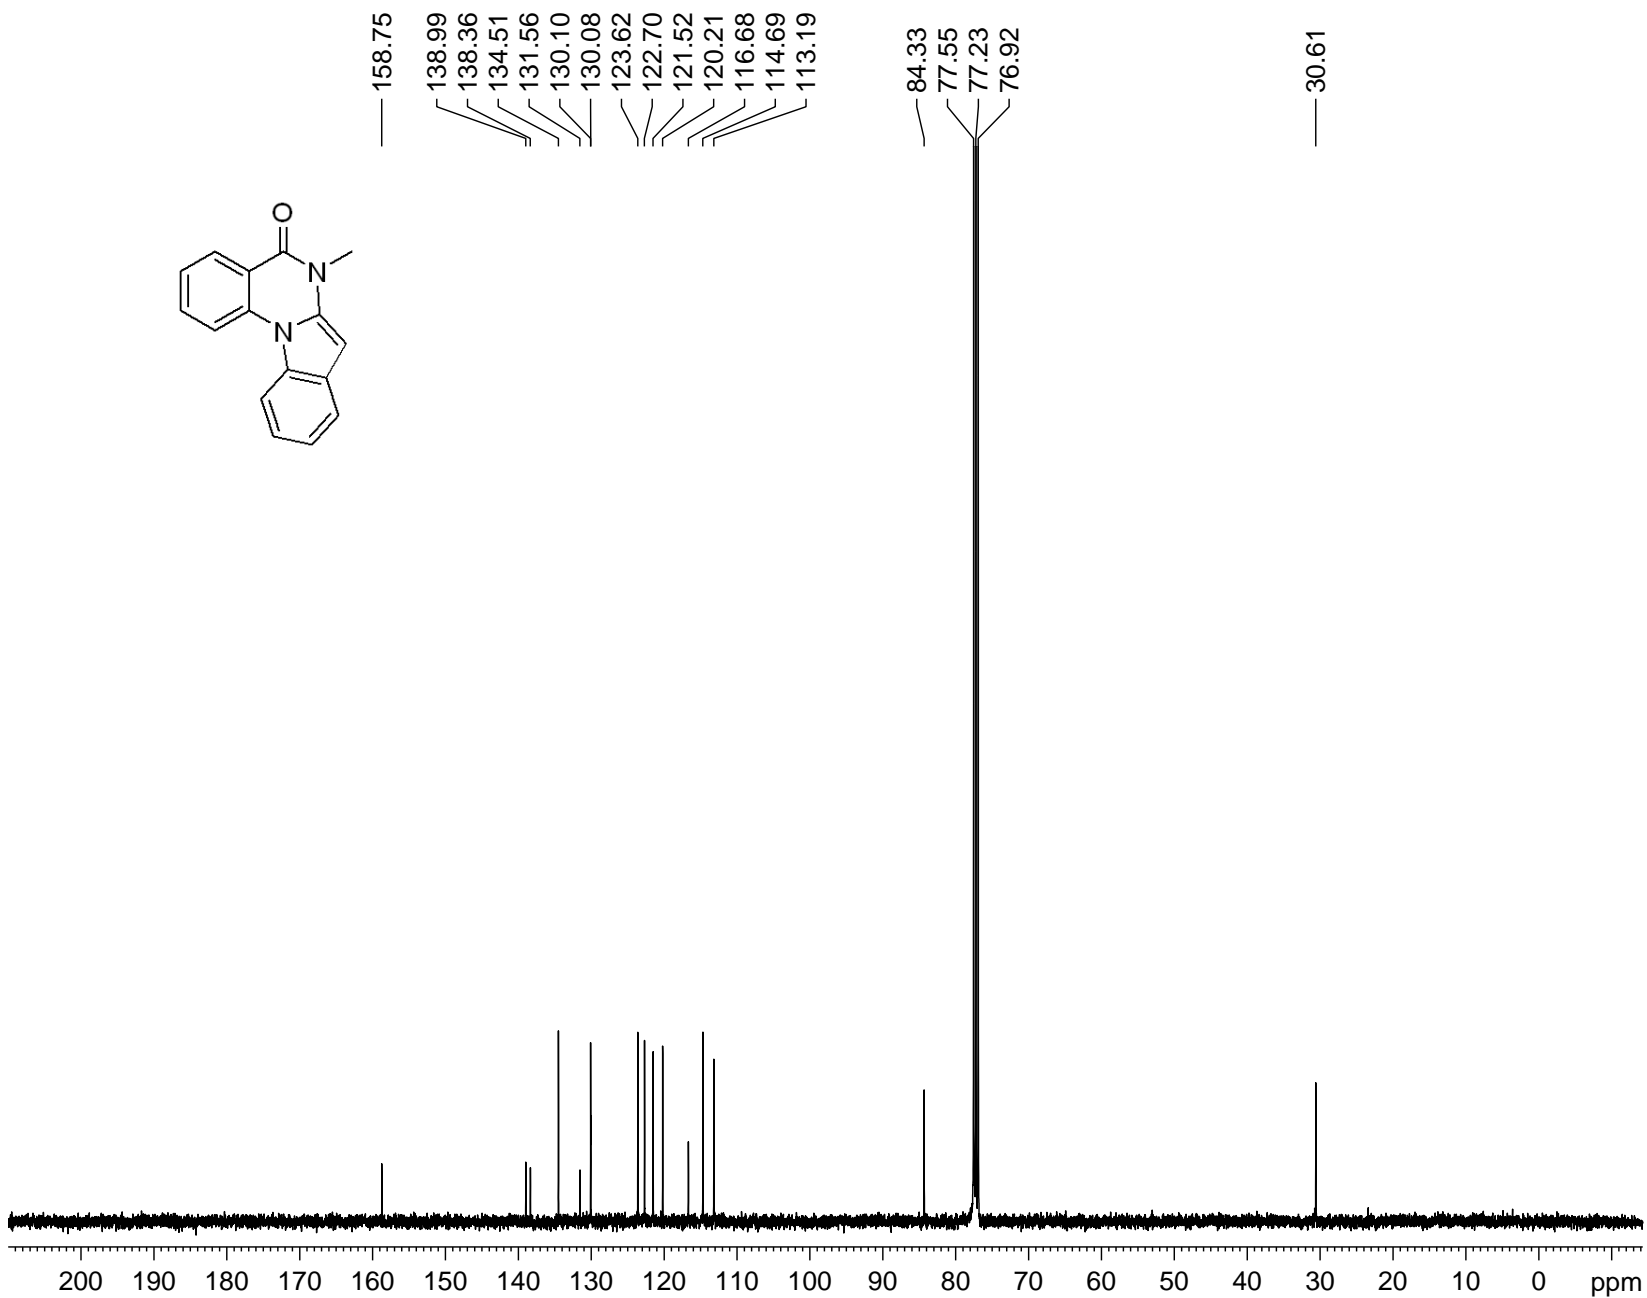

Current Data Parameters

NAME Trimurthulu  
EXPNO 357  
PROCNO 1

F2 - Acquisition Parameters

Date\_ 20131005  
Time 18.11  
INSTRUM spect  
PROBHD 5 mm BBO BB-1H  
PULPROG zgpg30  
TD 32768  
SOLVENT CDCl3  
NS 593  
DS 0  
SWH 24038.461 Hz  
FIDRES 0.733596 Hz  
AQ 0.6816452 sec  
RG 8192  
DW 20.800 usec  
DE 6.50 usec  
TE 299.0 K  
D1 2.00000000 sec  
D11 0.03000000 sec  
TD0 1

==== CHANNEL f1 =====

NUC1 13C  
P1 9.40 usec  
PL1 7.00 dB  
SFO1 100.6233325 MHz

==== CHANNEL f2 =====

CPDPRG2 waltz16  
NUC2 1H  
PCPD2 90.00 usec  
PL2 3.00 dB  
PL12 20.70 dB  
PL13 23.70 dB  
SFO2 400.1316005 MHz

F2 - Processing parameters

SI 32768  
SF 100.6127485 MHz  
WDW EM  
SSB 0  
LB 1.00 Hz  
GB 0  
PC 1.00

H spectrum of Final

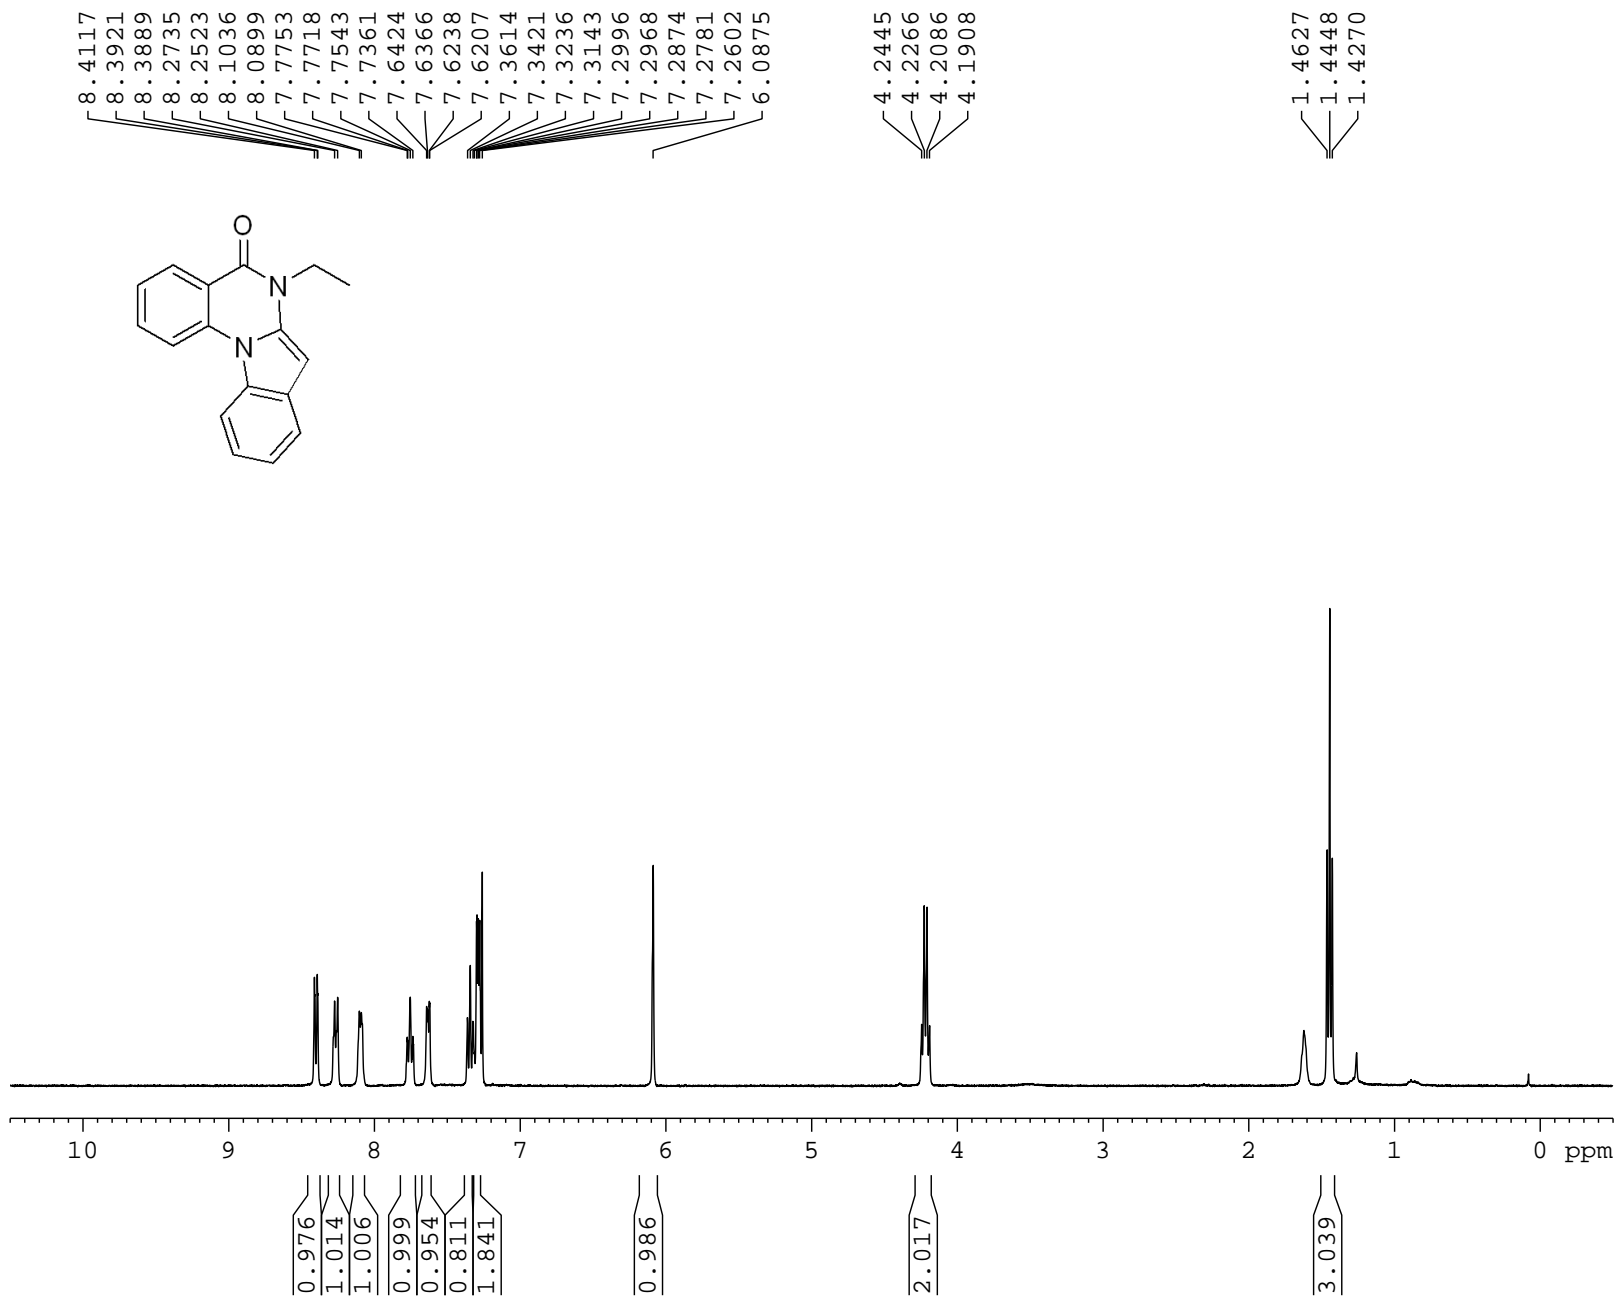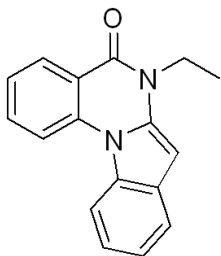

Current Data Parameters  
NAME kotl  
EXPNO 3  
PROCNO 1

F2 - Acquisition Parameters  
Date\_ 20120519  
Time 3.44  
INSTRUM spect  
PROBHD 5 mm BBO BB-1H  
PULPROG zg30  
TD 32768  
SOLVENT CDCl3  
NS 32  
DS 0  
SWH 7246.377 Hz  
FIDRES 0.221142 Hz  
AQ 2.2611110 sec  
RG 4  
DW 69.000 usec  
DE 6.50 usec  
TE 299.0 K  
D1 2.00000000 sec  
TD0 1

===== CHANNEL f1 =====  
NUC1 1H  
P1 11.70 usec  
PL1 4.00 dB  
SFO1 400.1324008 MHz

F2 - Processing parameters  
SI 16384  
SF 400.1300082 MHz  
WDW EM  
SSB 0  
LB 0 Hz  
GB 0  
PC 1.00

C spectrum of Final

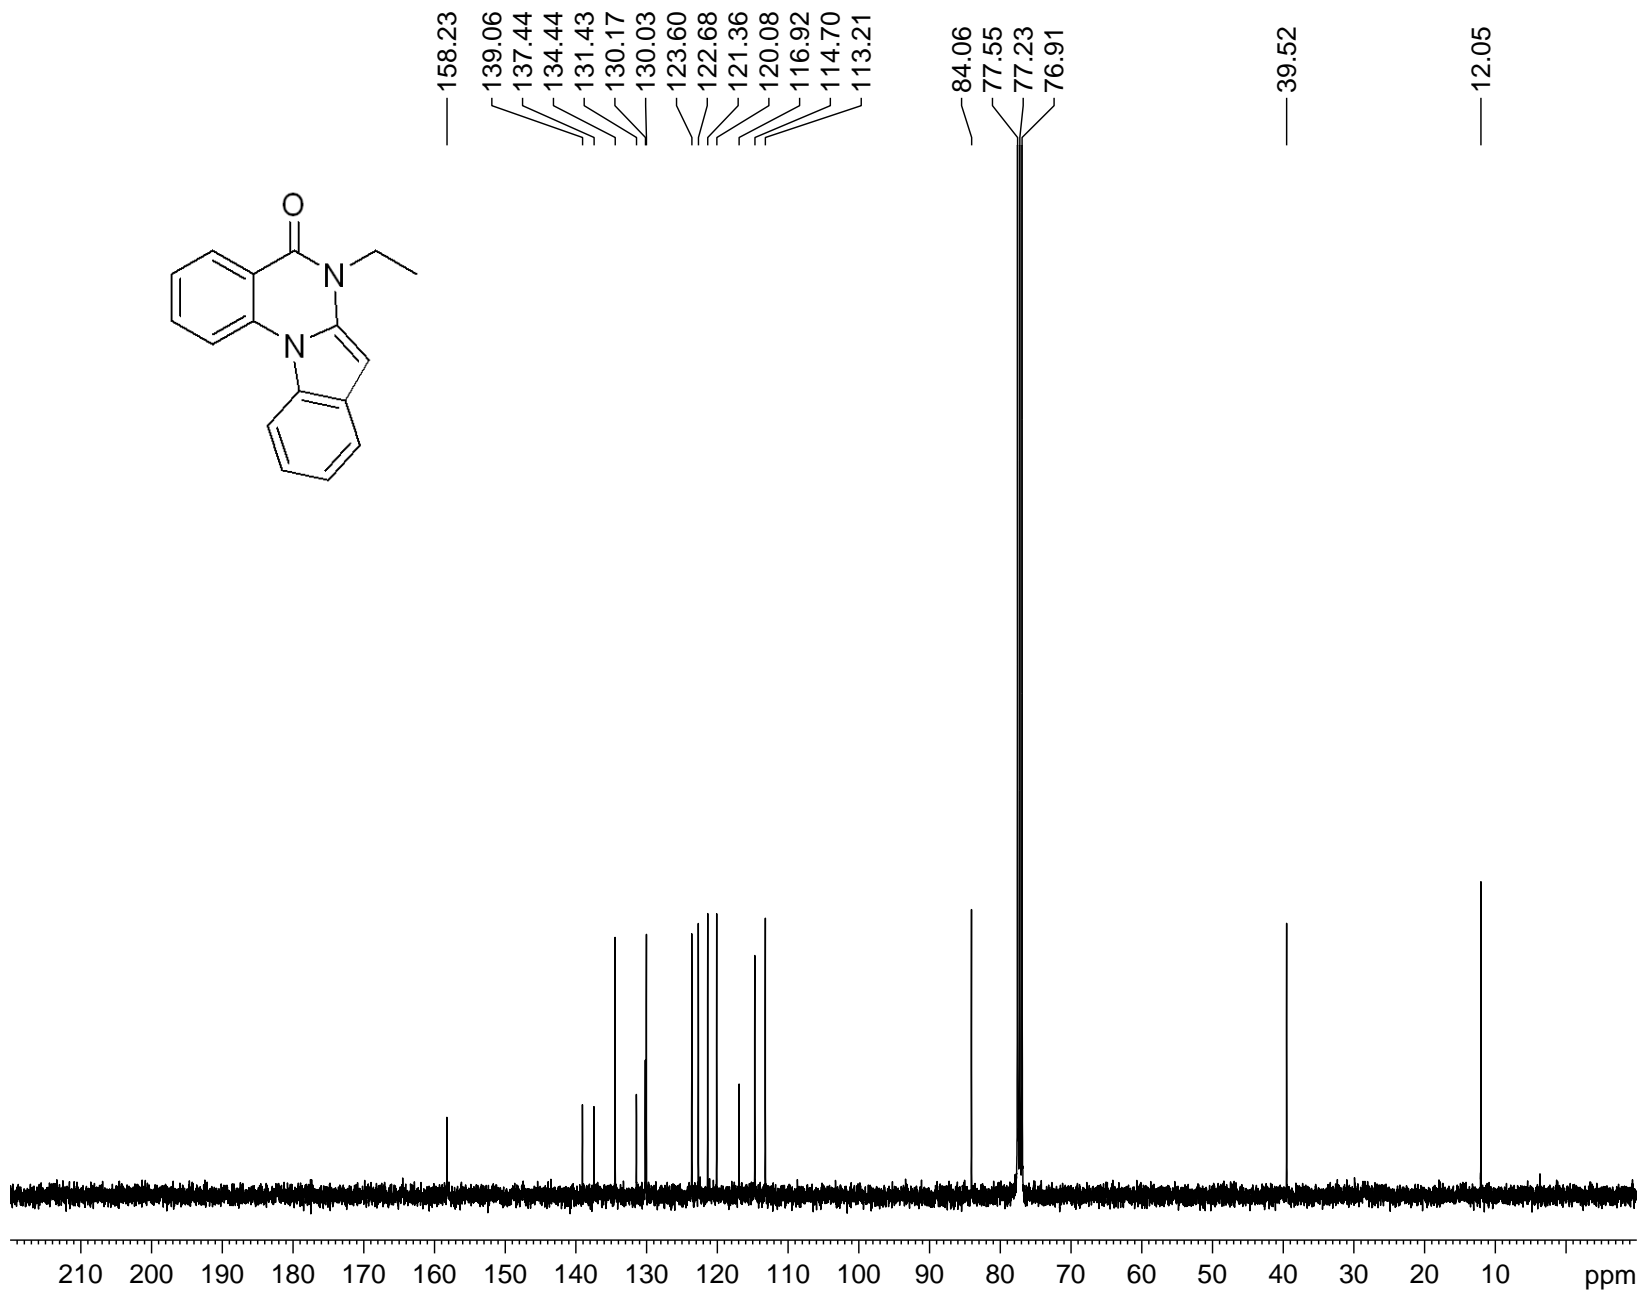

Current Data Parameters

NAME koti  
EXPNO 4  
PROCNO 1

F2 - Acquisition Parameters

Date\_ 20120519  
Time 3.46  
INSTRUM spect  
PROBHD 5 mm BBO BB-1H  
PULPROG zgpg30  
TD 32768  
SOLVENT CDCl3  
NS 500  
DS 0  
SWH 24038.461 Hz  
FIDRES 0.733596 Hz  
AQ 0.6816452 sec  
RG 8192  
DW 20.800 usec  
DE 6.50 usec  
TE 298.9 K  
D1 2.00000000 sec  
D11 0.03000000 sec  
TD0 1

===== CHANNEL f1 =====

NUC1 13C  
P1 8.90 usec  
PL1 7.00 dB  
SFO1 100.6233325 MHz

===== CHANNEL f2 =====

CPDPRG2 waltz16  
NUC2 1H  
PCPD2 90.00 usec  
PL2 3.80 dB  
PL12 21.60 dB  
PL13 24.60 dB  
SFO2 400.1316005 MHz

F2 - Processing parameters

SI 32768  
SF 100.6127491 MHz  
WDW EM  
SSB 0  
LB 1.00 Hz  
GB 0  
PC 1.00



<sup>1</sup>H of N--ph- fi

8.2562  
8.2399  
8.0692  
8.0641  
8.0593  
8.0466  
7.7861  
7.7825  
7.7642  
7.7614  
7.7470  
7.7430  
7.5517  
7.5479  
7.5397  
7.5366  
7.5291  
7.4245  
7.4060  
7.3759  
7.3567  
7.3461  
7.3379  
7.3283  
7.3092  
7.2824  
7.2634  
7.2602  
7.2530  
7.2456  
7.2417  
6.0068  
5.3593

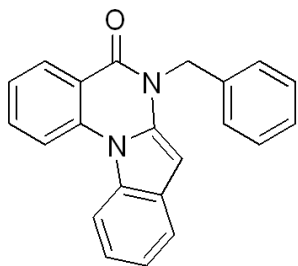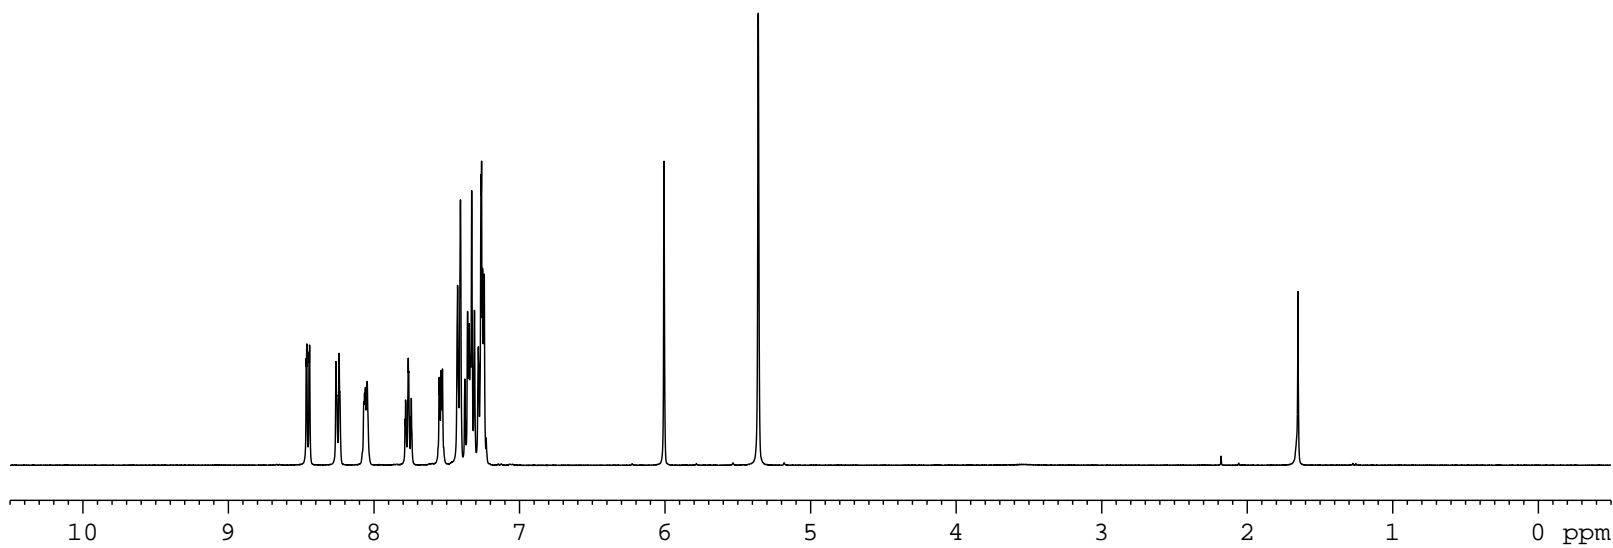

1.000  
1.043  
1.035  
1.027  
1.040  
1.990  
3.054  
3.218

0.992

2.011

Current Data Parameters  
NAME Trimurthulu  
EXPNO 141  
PROCNO 1

F2 - Acquisition Parameters  
Date\_ 20120822  
Time 12.19  
INSTRUM spect  
PROBHD 5 mm BBO BB-1H  
PULPROG zg30  
TD 32768  
SOLVENT CDCl3  
NS 16  
DS 0  
SWH 7246.377 Hz  
FIDRES 0.221142 Hz  
AQ 2.2611110 sec  
RG 128  
DW 69.000 usec  
DE 6.50 usec  
TE 298.6 K  
D1 2.0000000 sec  
TD0 1

===== CHANNEL f1 =====  
NUC1 1H  
P1 11.70 usec  
PL1 4.00 dB  
SFO1 400.1324008 MHz

F2 - Processing parameters  
SI 16384  
SF 400.1300087 MHz  
WDW EM  
SSB 0  
LB 0 Hz  
GB 0  
PC 1.00

13C

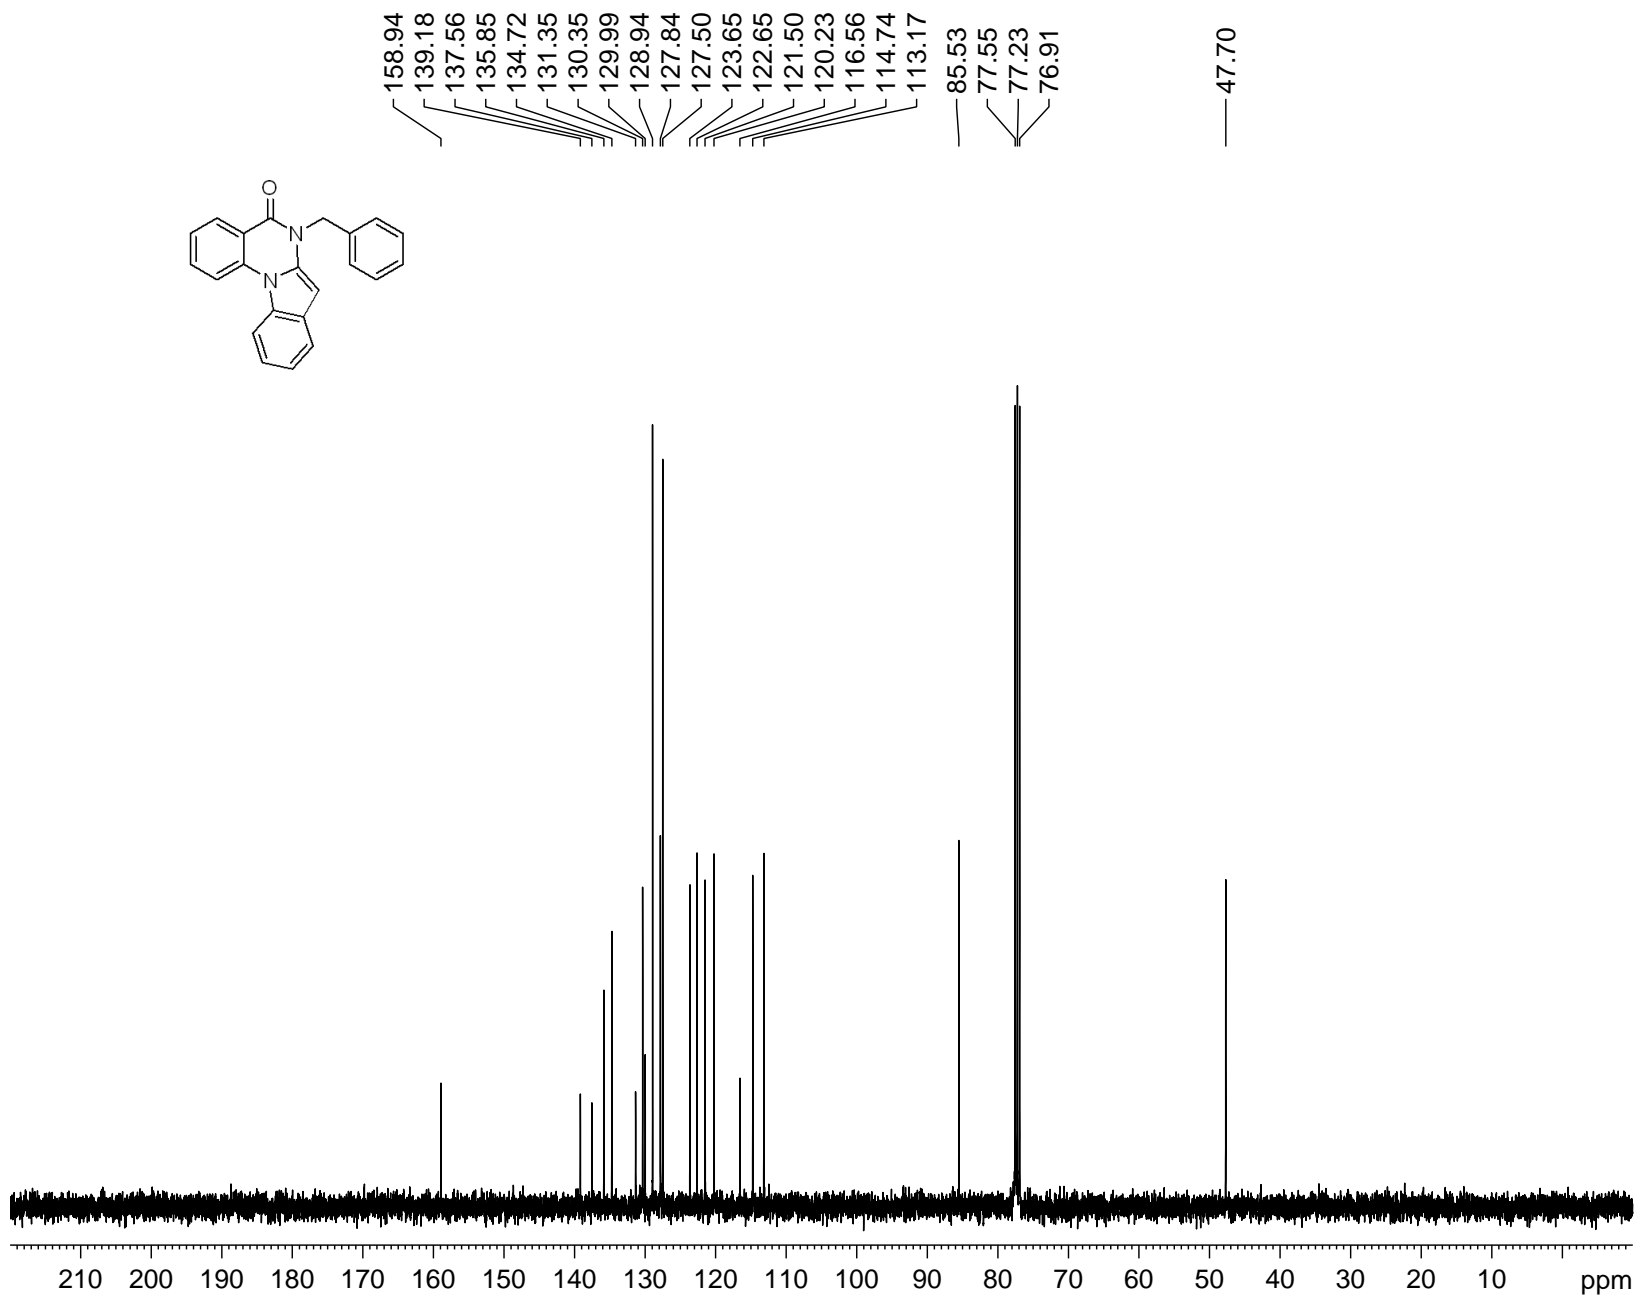

Current Data Parameters

NAME Trimurthulu  
EXPNO 142  
PROCNO 1

F2 - Acquisition Parameters

Date\_ 20120822  
Time 12.25  
INSTRUM spect  
PROBHD 5 mm BBO BB-1H  
PULPROG zgpg30  
TD 32768  
SOLVENT CDCl3  
NS 217  
DS 0  
SWH 24038.461 Hz  
FIDRES 0.733596 Hz  
AQ 0.6816452 sec  
RG 32768  
DW 20.800 usec  
DE 6.50 usec  
TE 299.1 K  
D1 2.00000000 sec  
D11 0.03000000 sec  
TD0 1

===== CHANNEL f1 =====

NUC1 13C  
P1 8.90 usec  
PL1 7.00 dB  
SFO1 100.6233325 MHz

===== CHANNEL f2 =====

CPDPRG2 waltz16  
NUC2 1H  
PCPD2 90.00 usec  
PL2 3.80 dB  
PL12 21.60 dB  
PL13 24.60 dB  
SFO2 400.1316005 MHz

F2 - Processing parameters

SI 32768  
SF 100.6127514 MHz  
WDW EM  
SSB 0  
LB 1.00 Hz  
GB 0  
PC 1.00

1H of N-Ph Final

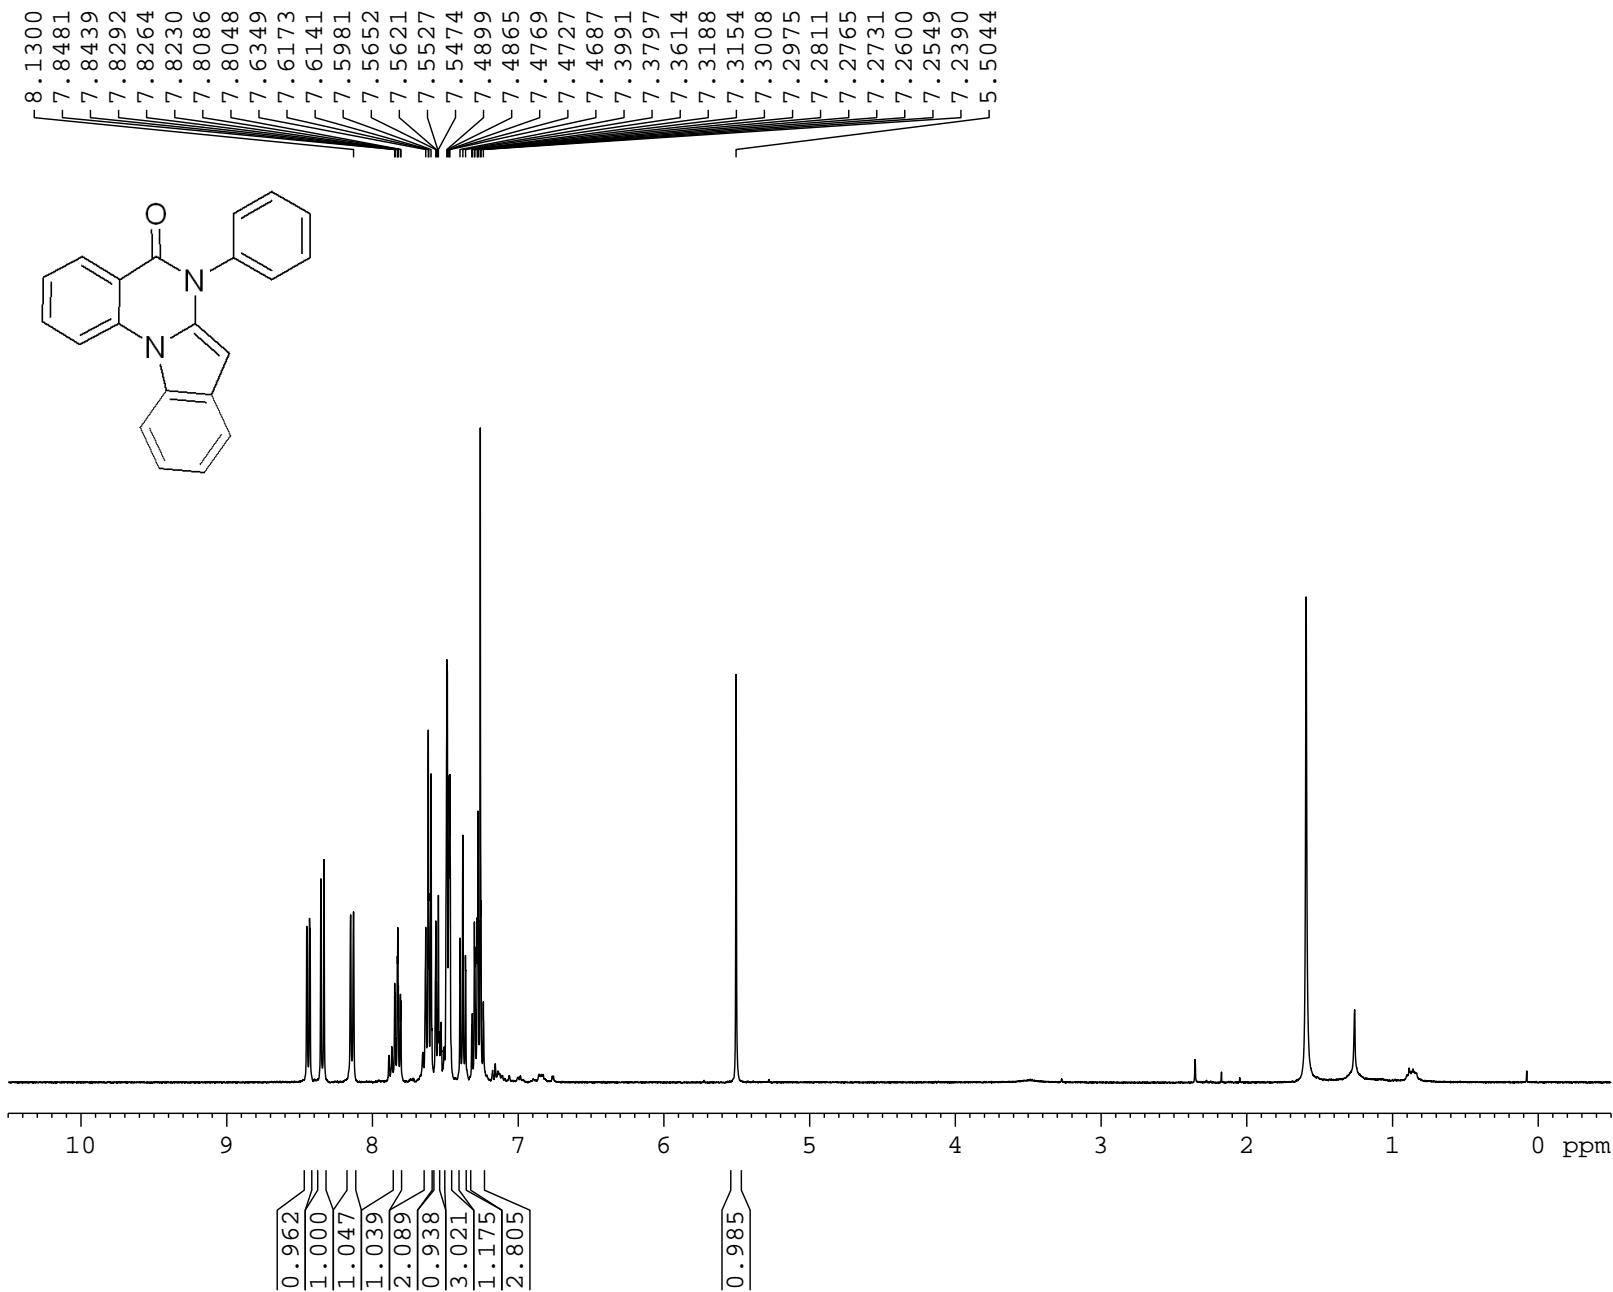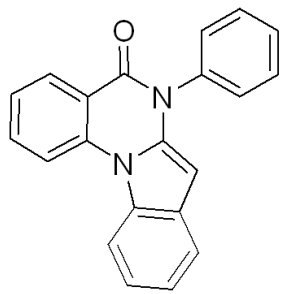

NAME Trimurthulu  
 EXPNO 274  
 PROCNO 1  
 Date\_ 20130510  
 Time 18.16  
 INSTRUM spect  
 PROBHD 5 mm BBO BB-1H  
 PULPROG zg30  
 TD 32768  
 SOLVENT CDCl3  
 NS 16  
 DS 0  
 SWH 7246.377 Hz  
 FIDRES 0.221142 Hz  
 AQ 2.2611110 sec  
 RG 256  
 DW 69.000 usec  
 DE 6.50 usec  
 TE 298.1 K  
 D1 2.0000000 sec  
 TD0 1

===== CHANNEL f1 =====  
 NUC1 1H  
 P1 11.90 usec  
 PL1 3.00 dB  
 SFO1 400.1324008 MHz  
 SI 16384  
 SF 400.1300091 MHz  
 WDW EM  
 SSB 0  
 LB 0.00 Hz  
 GB 0  
 PC 1.00

1H of N-Ph Final

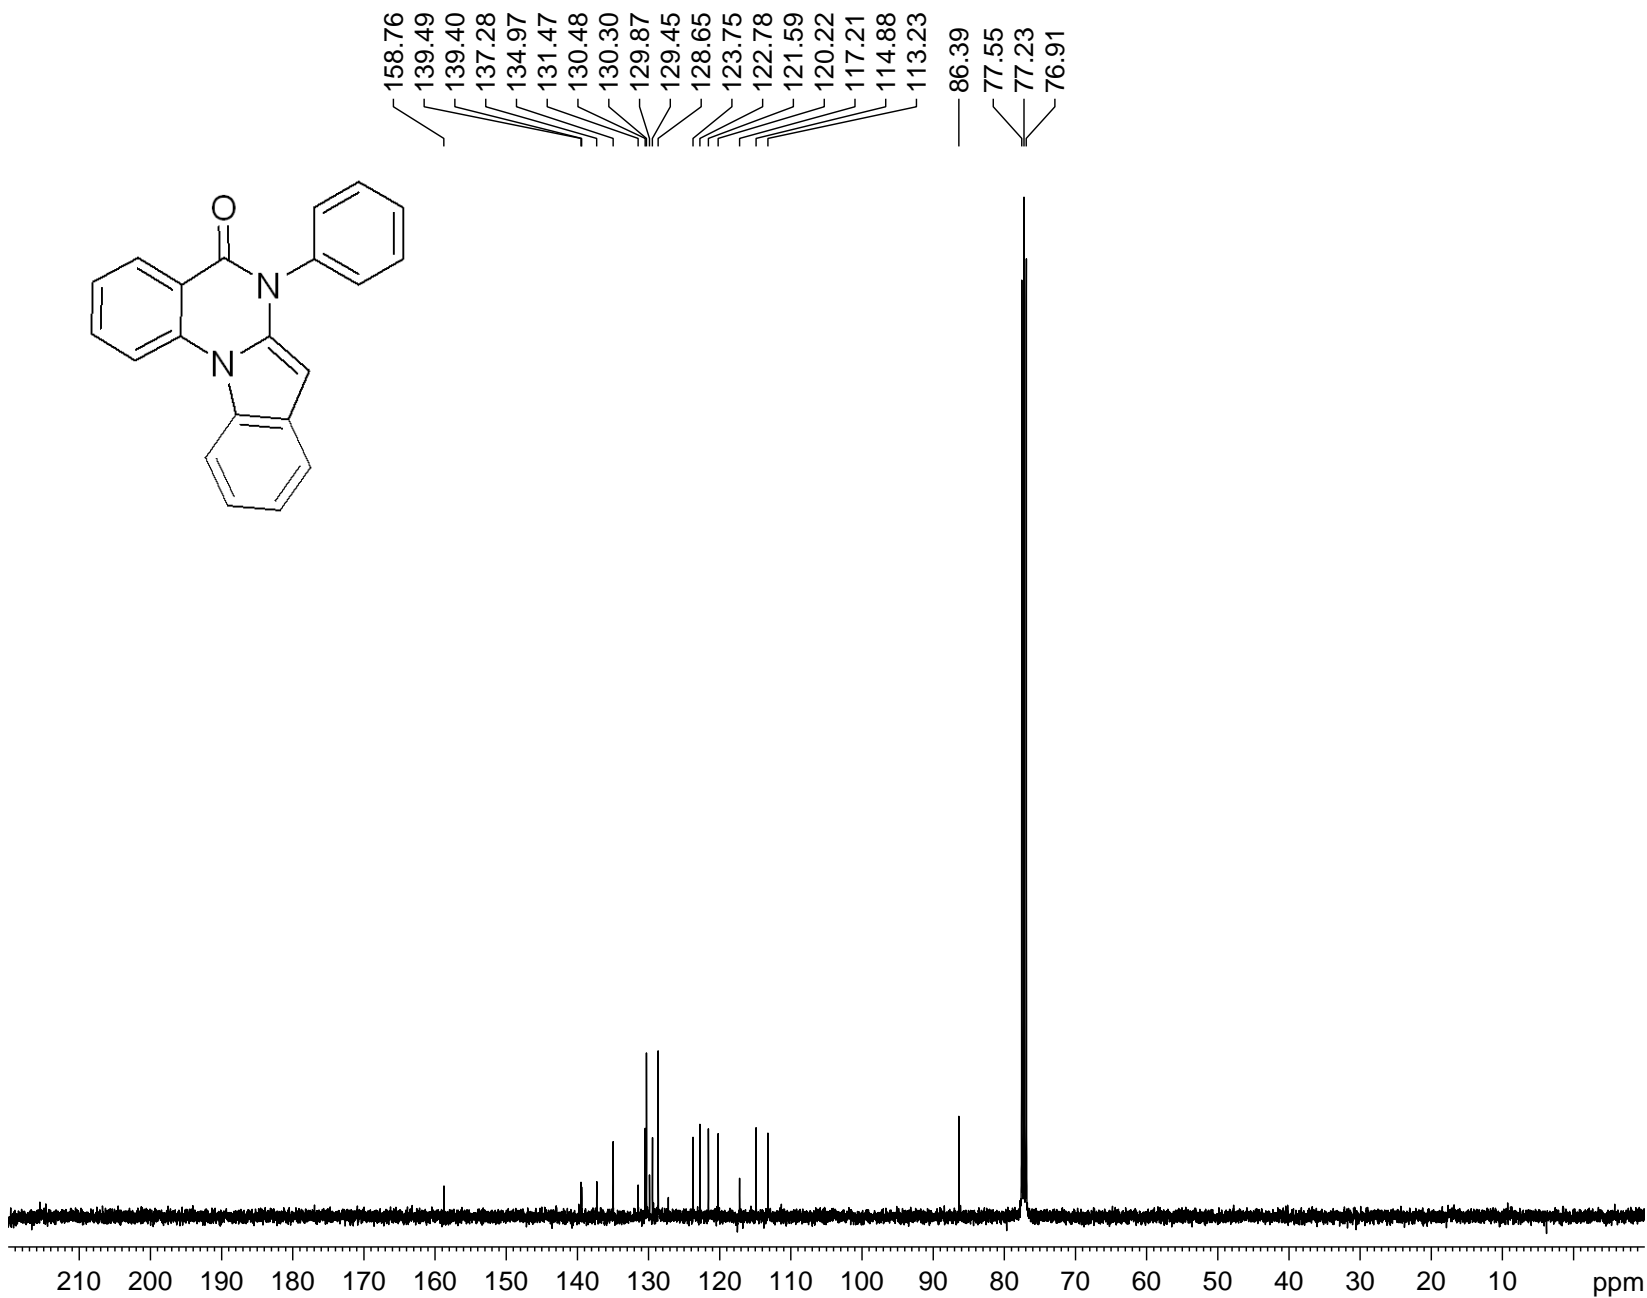

NAME Trimurthulu  
EXPNO 275  
PROCNO 1  
Date\_ 20130510  
Time 18.17  
INSTRUM spect  
PROBHD 5 mm BBO BB-1H  
PULPROG zgpg30  
TD 32768  
SOLVENT CDCl3  
NS 371  
DS 0  
SWH 24038.461 Hz  
FIDRES 0.733596 Hz  
AQ 0.6816452 sec  
RG 32768  
DW 20.800 usec  
DE 6.50 usec  
TE 298.1 K  
D1 2.00000000 sec  
D11 0.03000000 sec  
TD0 1

===== CHANNEL f1 =====  
NUC1 13C  
P1 9.40 usec  
PL1 7.00 dB  
SFO1 100.6233325 MHz

===== CHANNEL f2 =====  
CPDPRG2 waltz16  
NUC2 1H  
PCPD2 90.00 usec  
PL2 3.00 dB  
PL12 20.70 dB  
PL13 23.70 dB  
SFO2 400.1316005 MHz  
SI 32768  
SF 100.6127485 MHz  
WDW EM  
SSB 0  
LB 1.00 Hz  
GB 0  
PC 1.00

<sup>1</sup>H of ortho methyl NH-Final

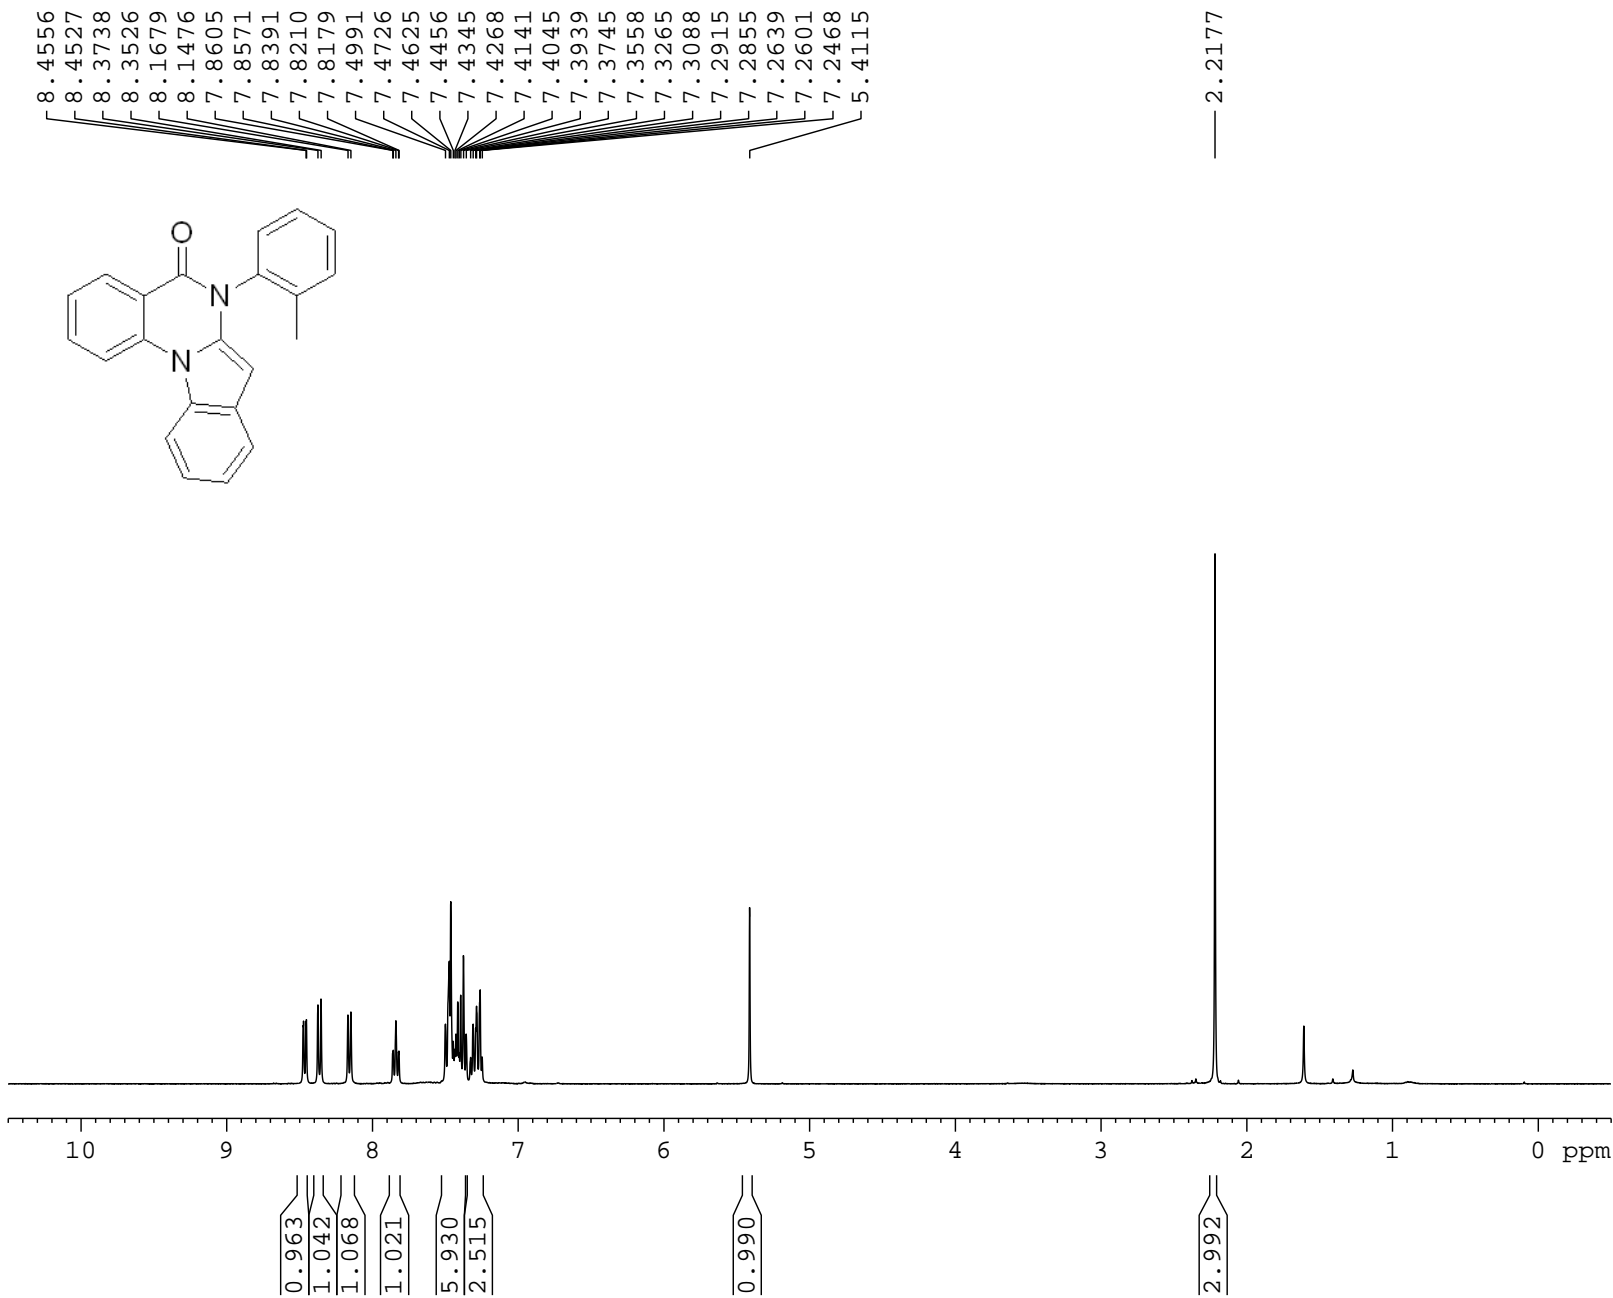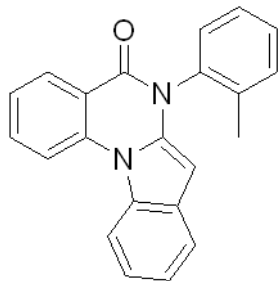

Current Data Parameters  
NAME Trimurthulu  
EXPNO 134  
PROCNO 1

F2 - Acquisition Parameters  
Date\_ 20120817  
Time 18.07  
INSTRUM spect  
PROBHD 5 mm BBO BB-1H  
PULPROG zg30  
TD 32768  
SOLVENT CDCl3  
NS 16  
DS 0  
SWH 7246.377 Hz  
FIDRES 0.221142 Hz  
AQ 2.2611110 sec  
RG 128  
DW 69.000 usec  
DE 6.50 usec  
TE 298.8 K  
D1 2.0000000 sec  
TD0 1

===== CHANNEL f1 =====  
NUC1 1H  
P1 11.70 usec  
PL1 4.00 dB  
SFO1 400.1324008 MHz

F2 - Processing parameters  
SI 16384  
SF 400.1300087 MHz  
WDW EM  
SSB 0  
LB 0 Hz  
GB 0  
PC 1.00

13C

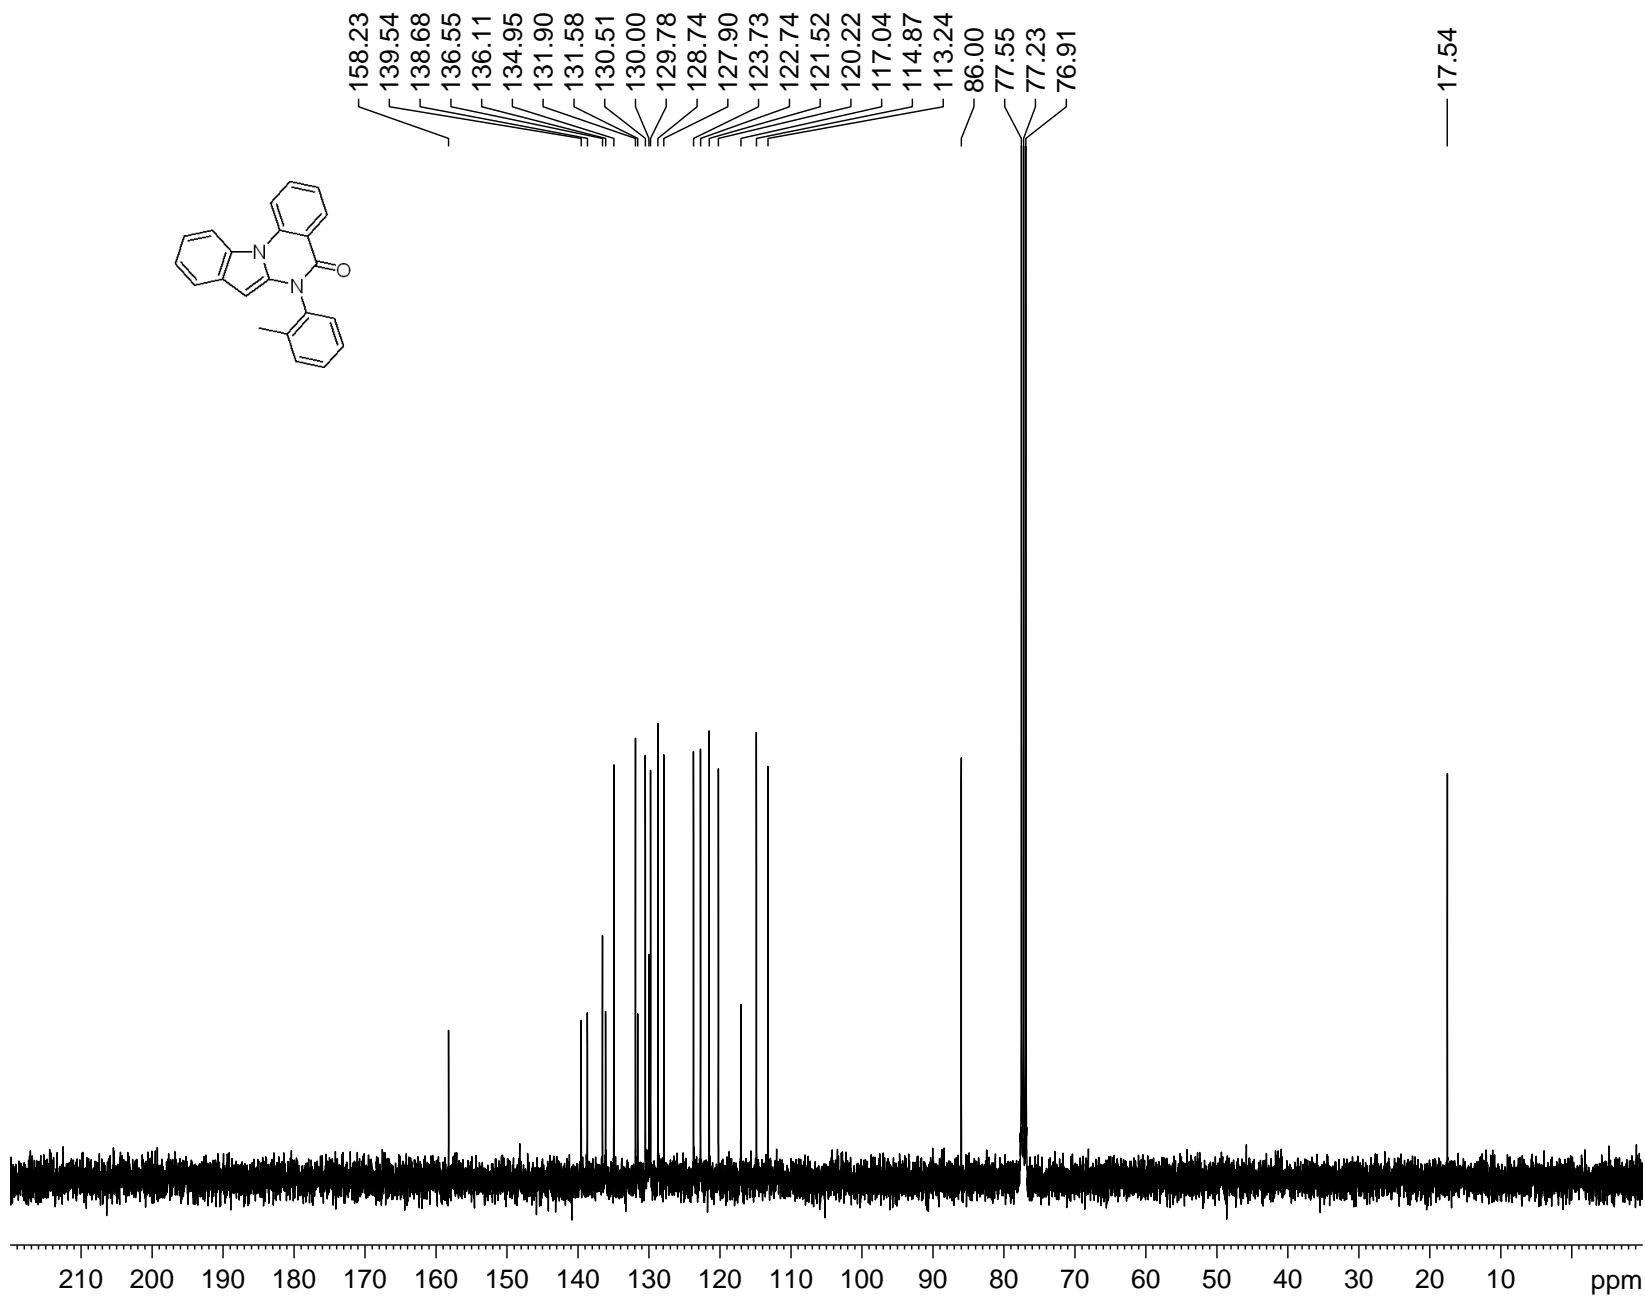

Current Data Parameters

NAME Trimurthulu  
EXPNO 135  
PROCNO 1

F2 - Acquisition Parameters

Date\_ 20120817  
Time 18.12  
INSTRUM spect  
PROBHD 5 mm BBO BB-1H  
PULPROG zgpg30  
TD 32768  
SOLVENT CDCl3  
NS 177  
DS 0  
SWH 24038.461 Hz  
FIDRES 0.733596 Hz  
AQ 0.6816452 sec  
RG 32768  
DW 20.800 usec  
DE 6.50 usec  
TE 299.2 K  
D1 2.00000000 sec  
D11 0.03000000 sec  
TD0 1

===== CHANNEL f1 =====

NUC1 13C  
P1 8.90 usec  
PL1 7.00 dB  
SFO1 100.6233325 MHz

===== CHANNEL f2 =====

CPDPRG2 waltz16  
NUC2 1H  
PCPD2 90.00 usec  
PL2 3.80 dB  
PL12 21.60 dB  
PL13 24.60 dB  
SFO2 400.1316005 MHz

F2 - Processing parameters

SI 32768  
SF 100.6127507 MHz  
WDW EM  
SSB 0  
LB 1.00 Hz  
GB 0  
PC 1.00

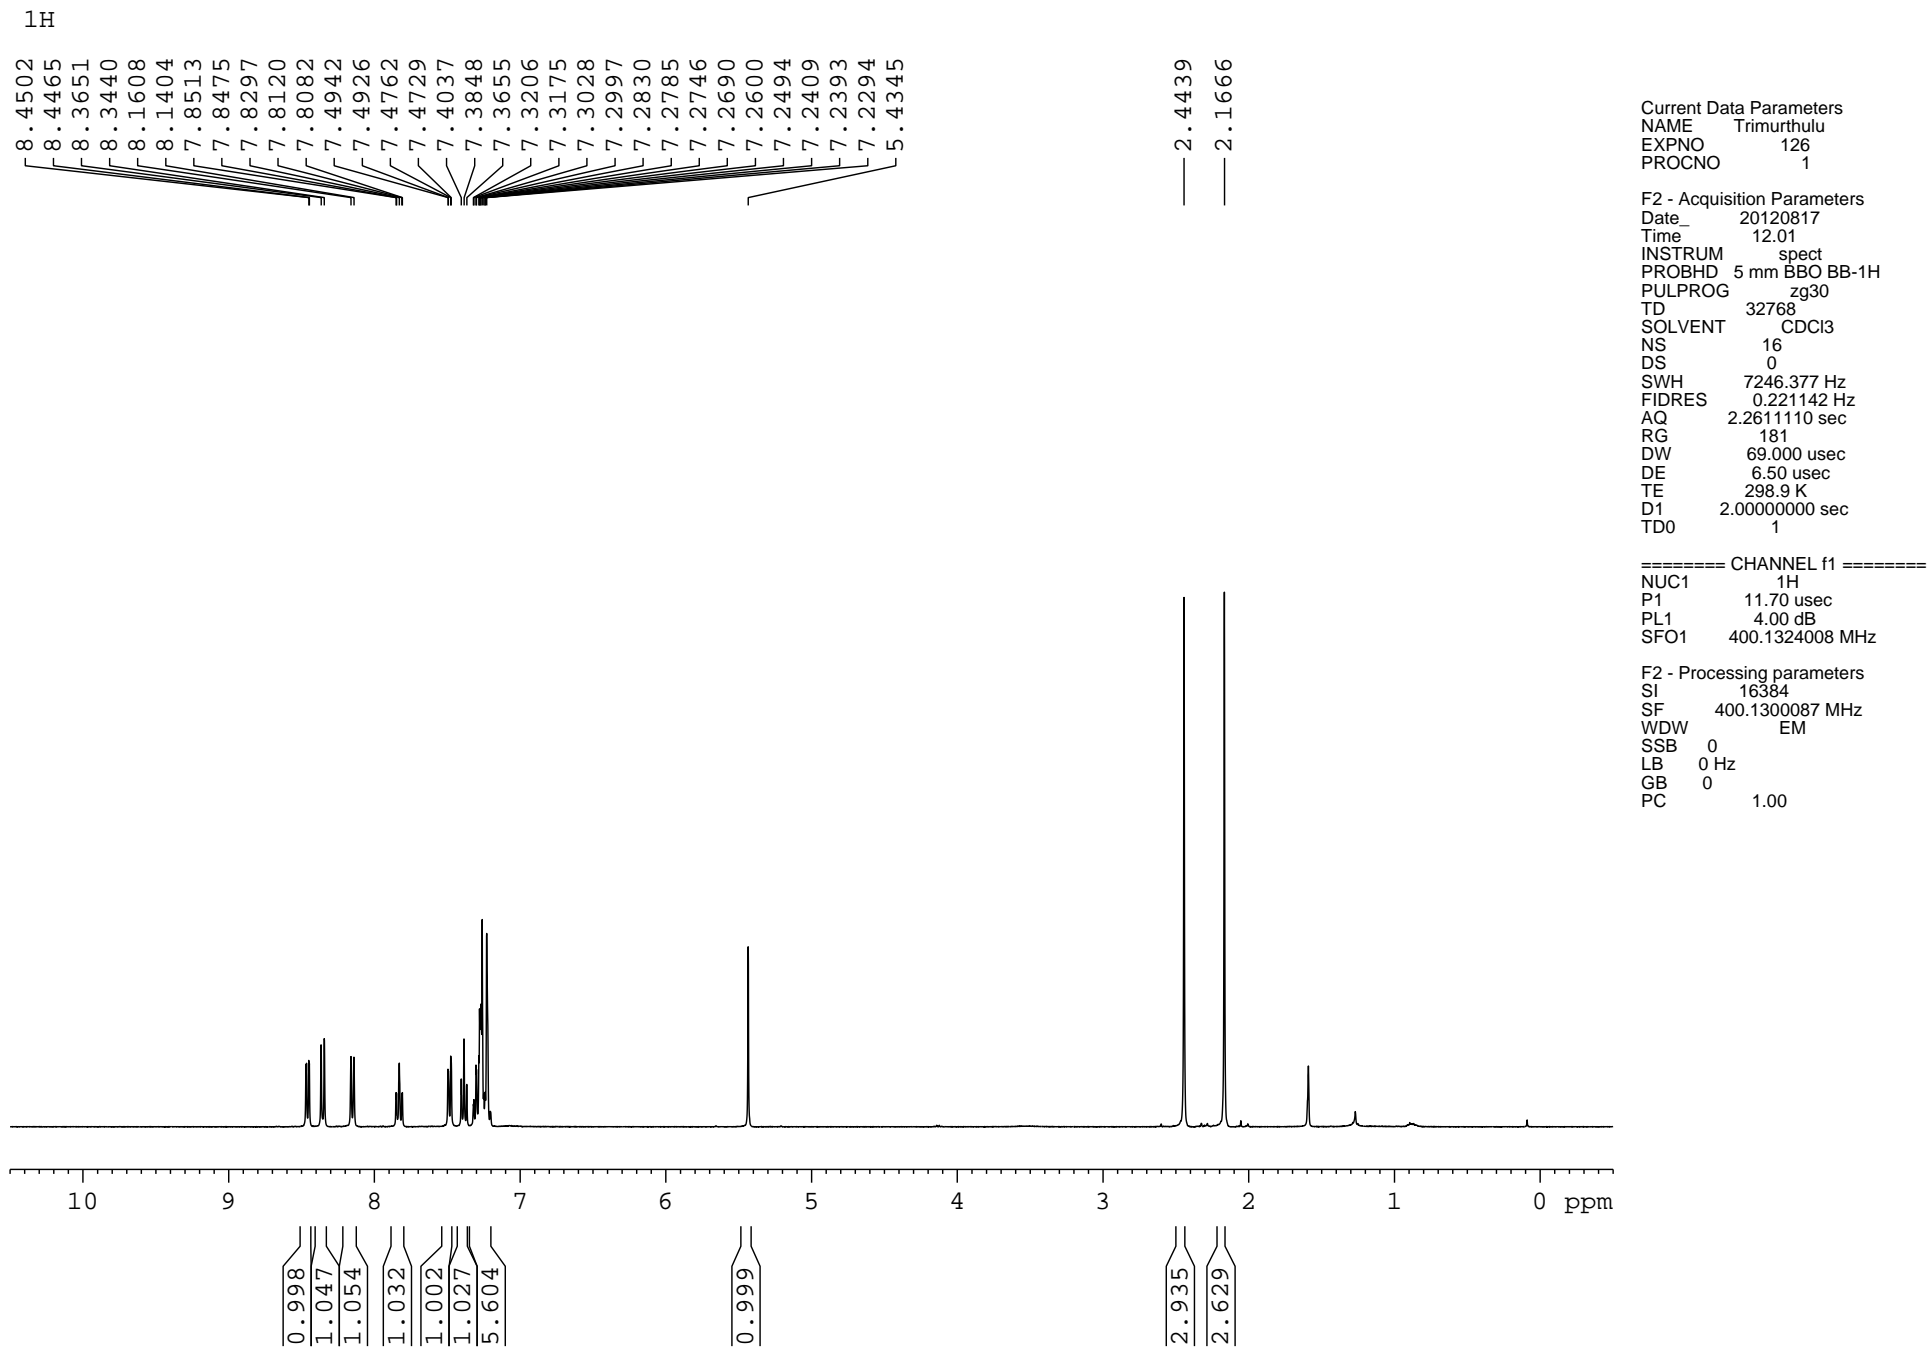

13C

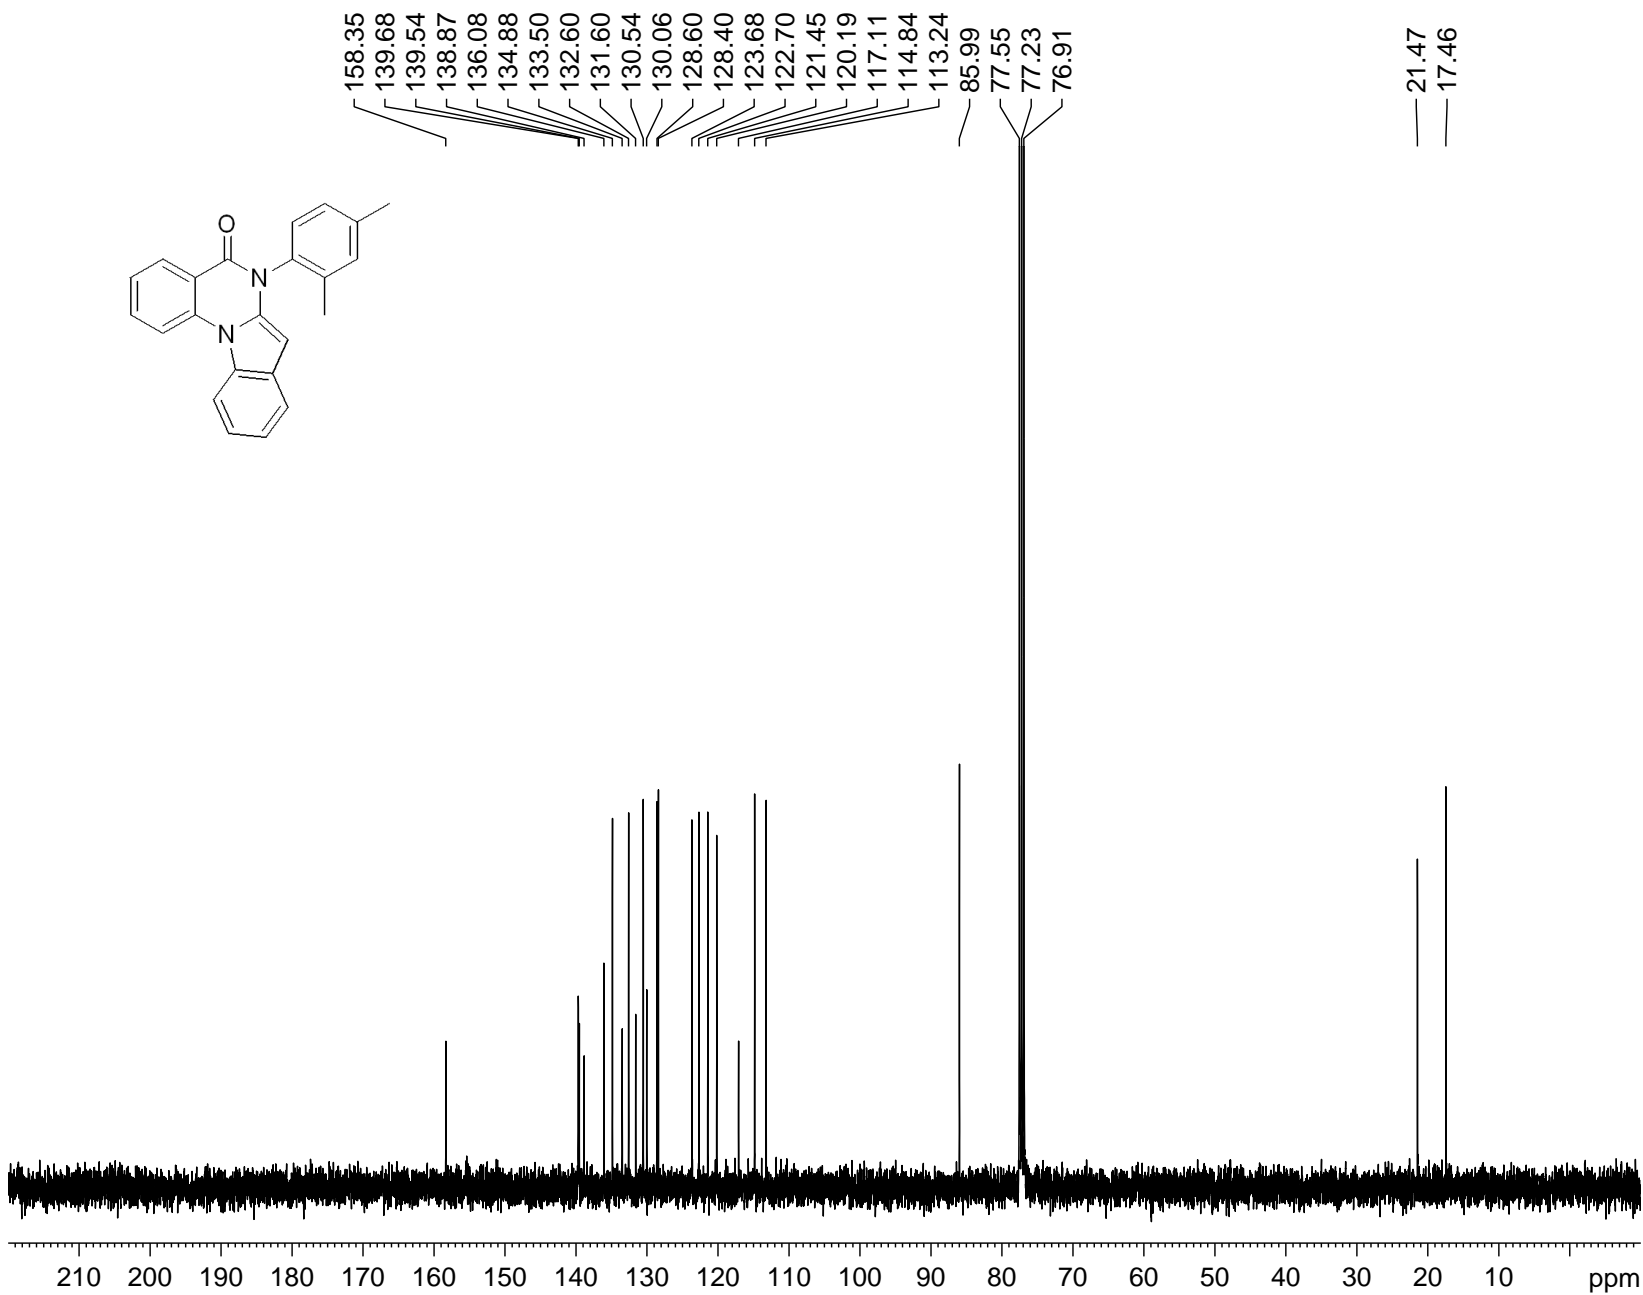

Current Data Parameters

NAME Trimurthulu  
EXPNO 127  
PROCNO 1

F2 - Acquisition Parameters

Date\_ 20120817  
Time 12.06  
INSTRUM spect  
PROBHD 5 mm BBO BB-1H  
PULPROG zgpg30  
TD 32768  
SOLVENT CDCl3  
NS 317  
DS 0  
SWH 24038.461 Hz  
FIDRES 0.733596 Hz  
AQ 0.6816452 sec  
RG 32768  
DW 20.800 usec  
DE 6.50 usec  
TE 299.3 K  
D1 2.00000000 sec  
D11 0.03000000 sec  
TD0 1

===== CHANNEL f1 =====

NUC1 13C  
P1 8.90 usec  
PL1 7.00 dB  
SFO1 100.6233325 MHz

===== CHANNEL f2 =====

CPDPRG2 waltz16  
NUC2 1H  
PCPD2 90.00 usec  
PL2 3.80 dB  
PL12 21.60 dB  
PL13 24.60 dB  
SFO2 400.1316005 MHz

F2 - Processing parameters

SI 32768  
SF 100.6127492 MHz  
WDW EM  
SSB 0  
LB 1.00 Hz  
GB 0  
PC 1.00



<sup>1</sup>H of N-Ph-OMe (Final)

8.1436  
 8.1235  
 7.8393  
 7.8352  
 7.8205  
 7.8175  
 7.8143  
 7.7999  
 7.7958  
 7.4985  
 7.4804  
 7.4763  
 7.4024  
 7.3939  
 7.3768  
 7.3721  
 7.3637  
 7.3539  
 7.3127  
 7.3088  
 7.2945  
 7.2908  
 7.2747  
 7.2701  
 7.2602  
 7.2551  
 7.2525  
 7.2368  
 7.1282  
 7.1199  
 7.1145  
 7.1030  
 7.0978  
 7.0895  
 5.5288  
 3.9052

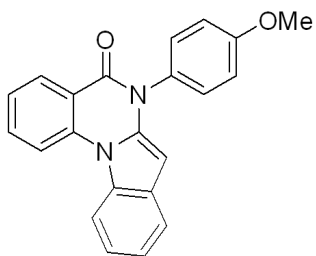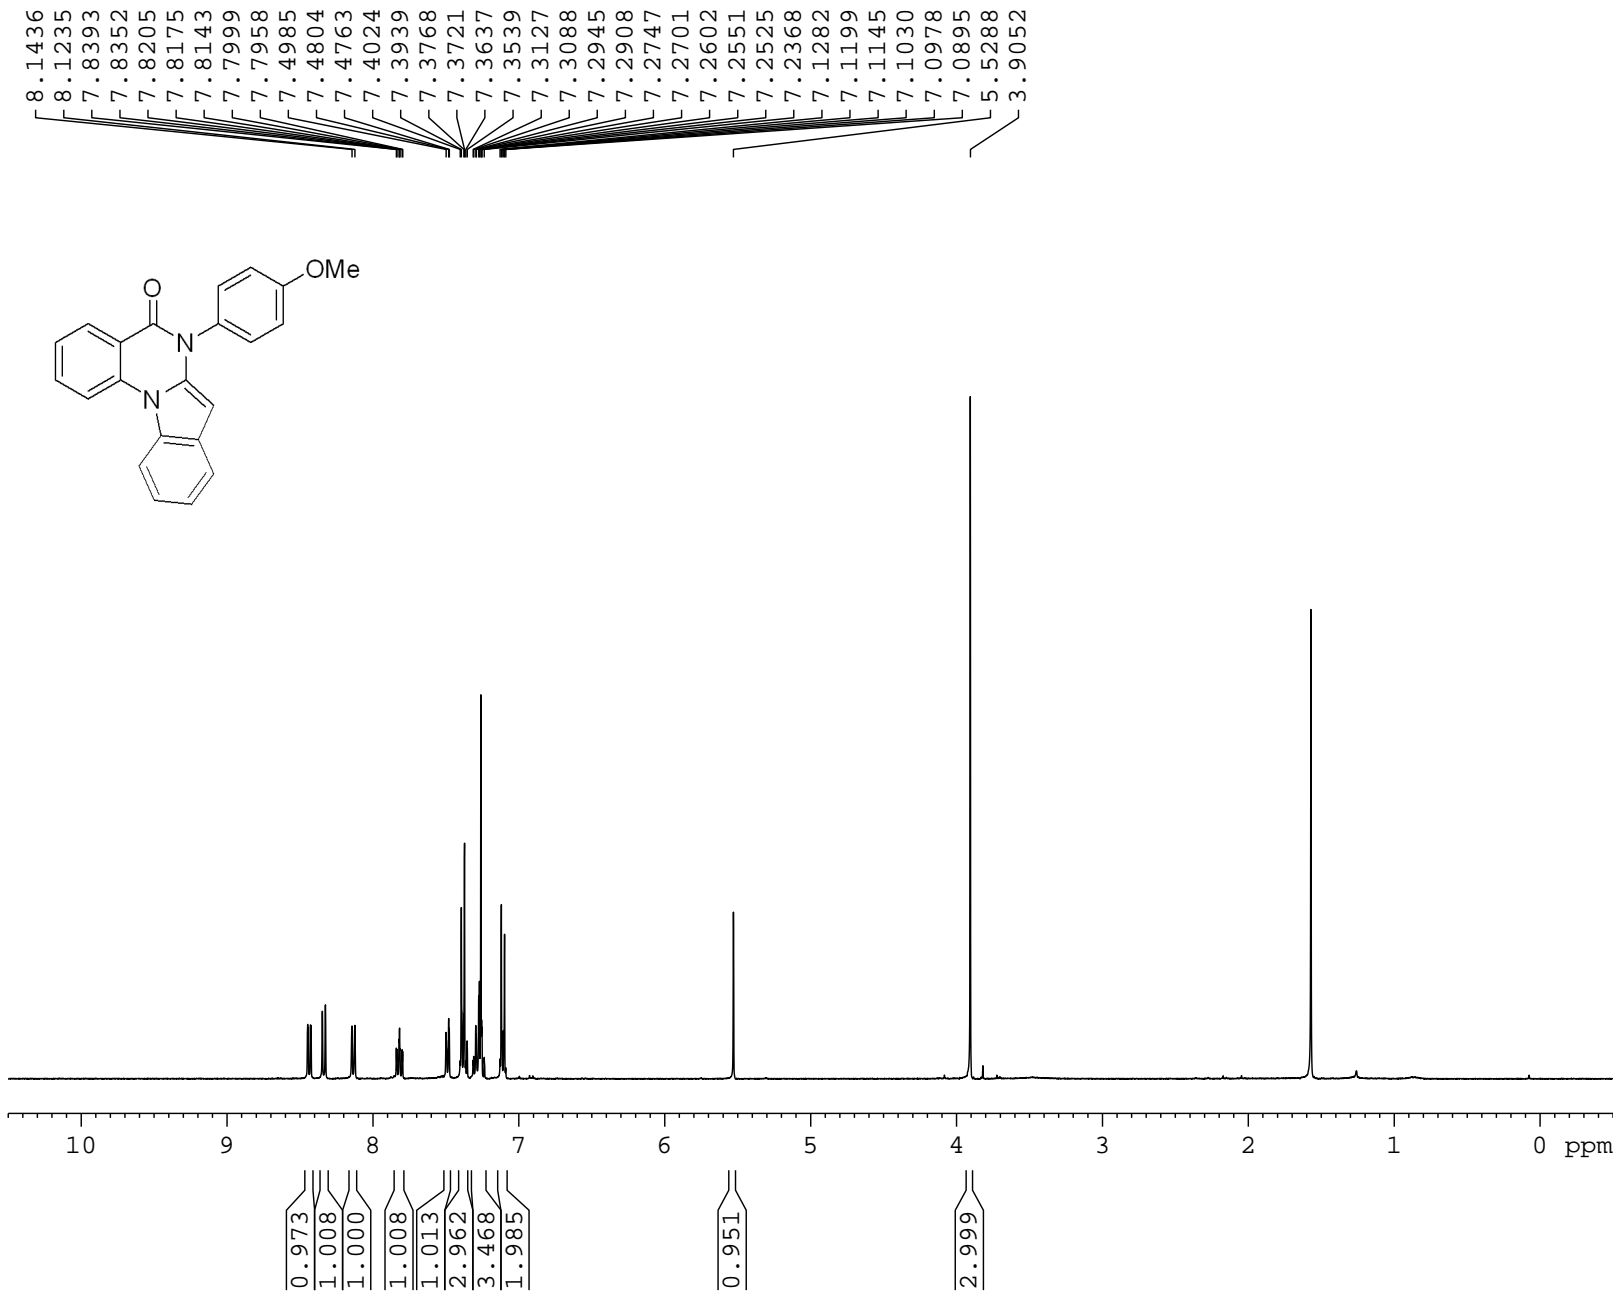

NAME Trimurthulu  
 EXPNO 164  
 PROCNO 1  
 Date\_ 20121004  
 Time 9.00  
 INSTRUM spect  
 PROBHD 5 mm BBO BB-1H  
 PULPROG zg30  
 TD 32768  
 SOLVENT CDCl3  
 NS 16  
 DS 0  
 SWH 7246.377 Hz  
 FIDRES 0.221142 Hz  
 AQ 2.2611110 sec  
 RG 256  
 DW 69.000 usec  
 DE 6.50 usec  
 TE 299.1 K  
 D1 2.0000000 sec  
 TD0 1

===== CHANNEL f1 =====  
 NUC1 1H  
 P1 11.90 usec  
 PL1 3.00 dB  
 SFO1 400.1324008 MHz  
 SI 16384  
 SF 400.1300091 MHz  
 WDW EM  
 SSB 0  
 LB 0.00 Hz  
 GB 0  
 PC 1.00

1h of N-ph-OMe final

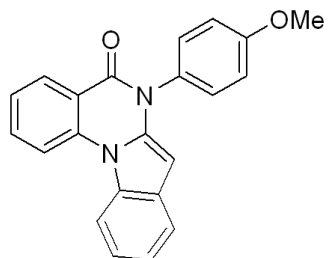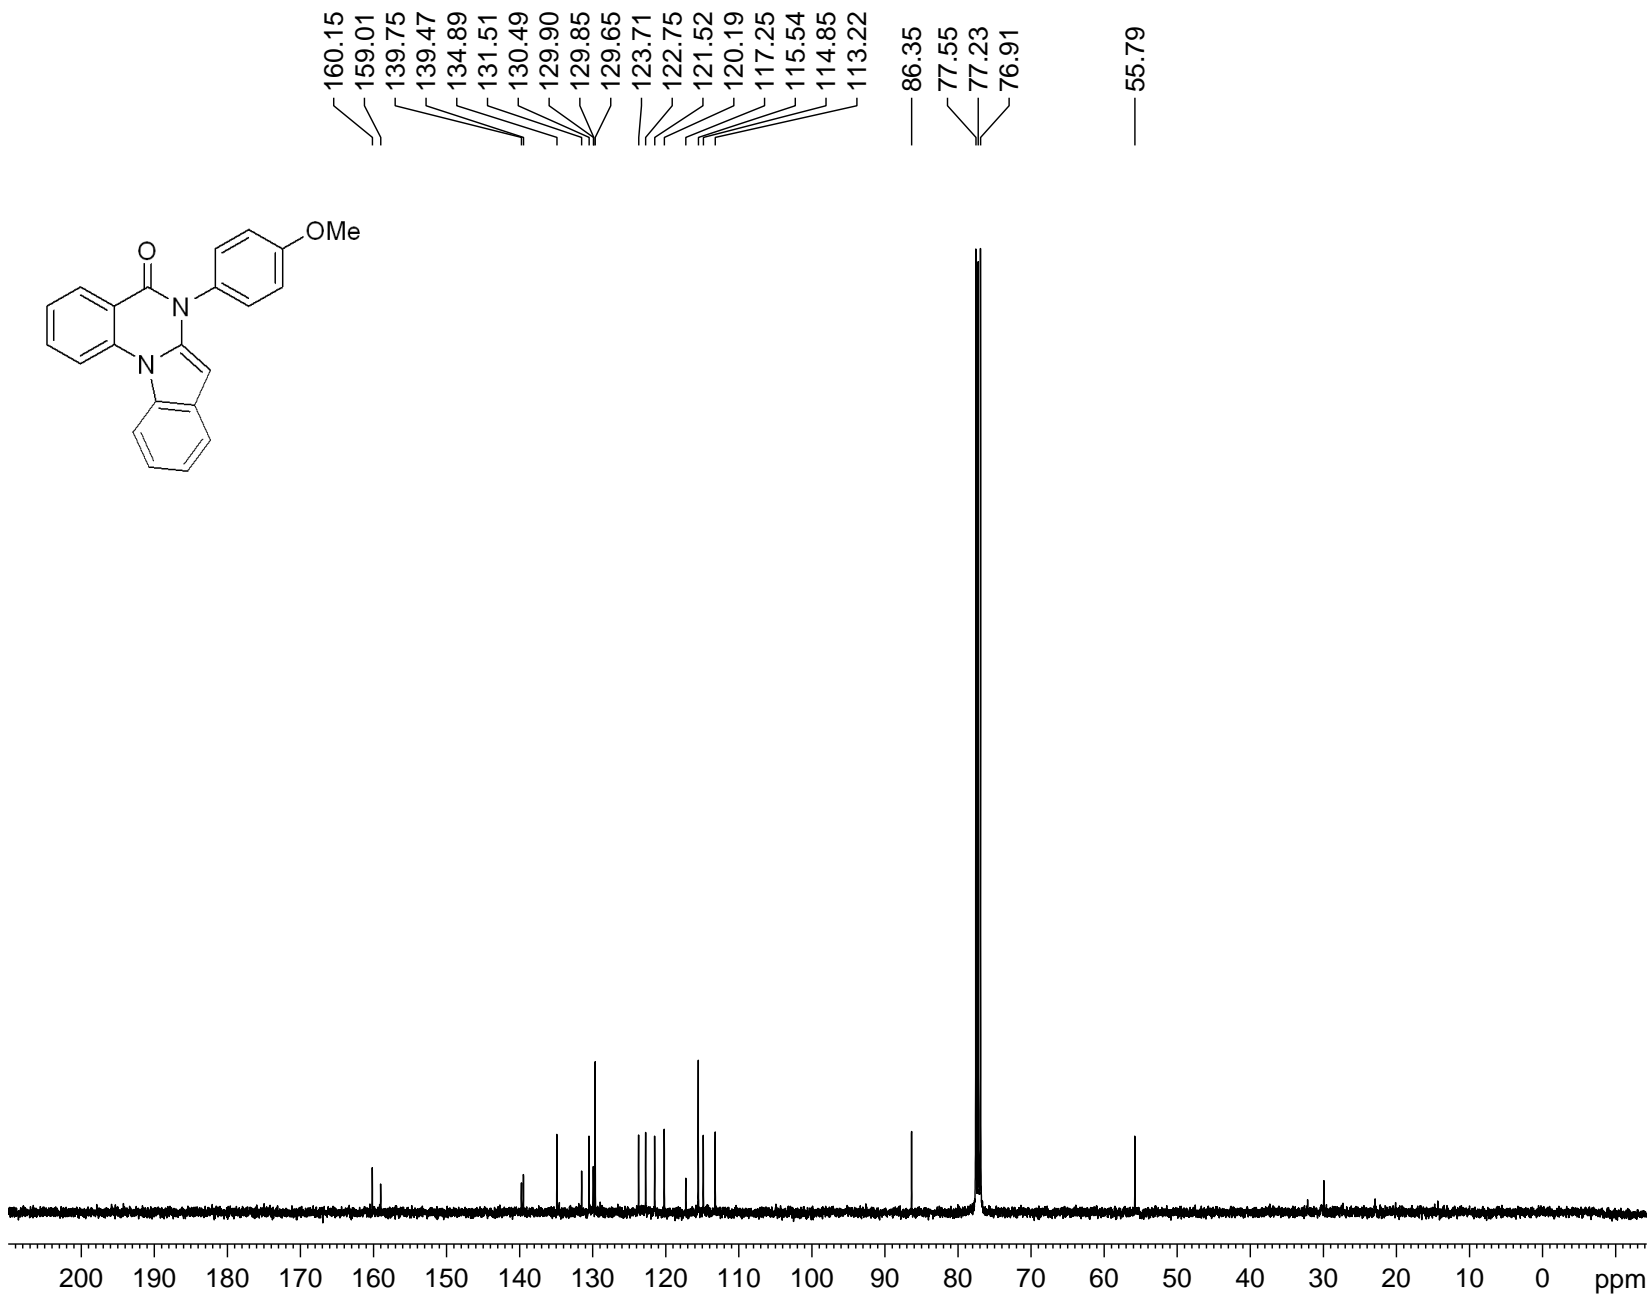

Current Data Parameters  
NAME Trimurthulu  
EXPNO 372  
PROCNO 1

F2 - Acquisition Parameters  
Date\_ 20131013  
Time 11.20  
INSTRUM spect  
PROBHD 5 mm BBO BB-1H  
PULPROG zgpg30  
TD 32768  
SOLVENT CDCl3  
NS 892  
DS 0  
SWH 24038.461 Hz  
FIDRES 0.733596 Hz  
AQ 0.6816452 sec  
RG 8192  
DW 20.800 usec  
DE 6.50 usec  
TE 299.6 K  
D1 2.0000000 sec  
D11 0.0300000 sec  
TD0 1

===== CHANNEL f1 =====  
NUC1 13C  
P1 9.40 usec  
PL1 7.00 dB  
SFO1 100.6233325 MHz

===== CHANNEL f2 =====  
CPDPRG2 waltz16  
NUC2 1H  
PCPD2 90.00 usec  
PL2 3.00 dB  
PL12 20.70 dB  
PL13 23.70 dB  
SFO2 400.1316005 MHz

F2 - Processing parameters  
SI 32768  
SF 100.6127481 MHz  
WDW EM  
SSB 0  
LB 1.00 Hz  
GB 0  
PC 1.00

<sup>1</sup>H of Tyrocene

9.2619  
8.4461  
8.4249  
8.2868  
8.2666  
8.2153  
8.1984  
8.1958  
7.8697  
7.8513  
7.8325  
7.6525  
7.6465  
7.6388  
7.6305  
7.4168  
7.3980  
7.3791  
7.2893  
7.2699  
7.2602  
7.2516  
7.2451  
7.2312  
7.1675  
7.1466  
6.7414  
6.7204  
6.3954

4.2266  
4.2068  
4.1865

3.4080  
2.9518  
2.9315  
2.9119  
2.5209  
2.5165  
2.5122

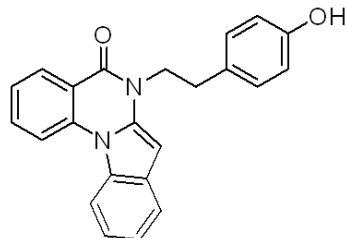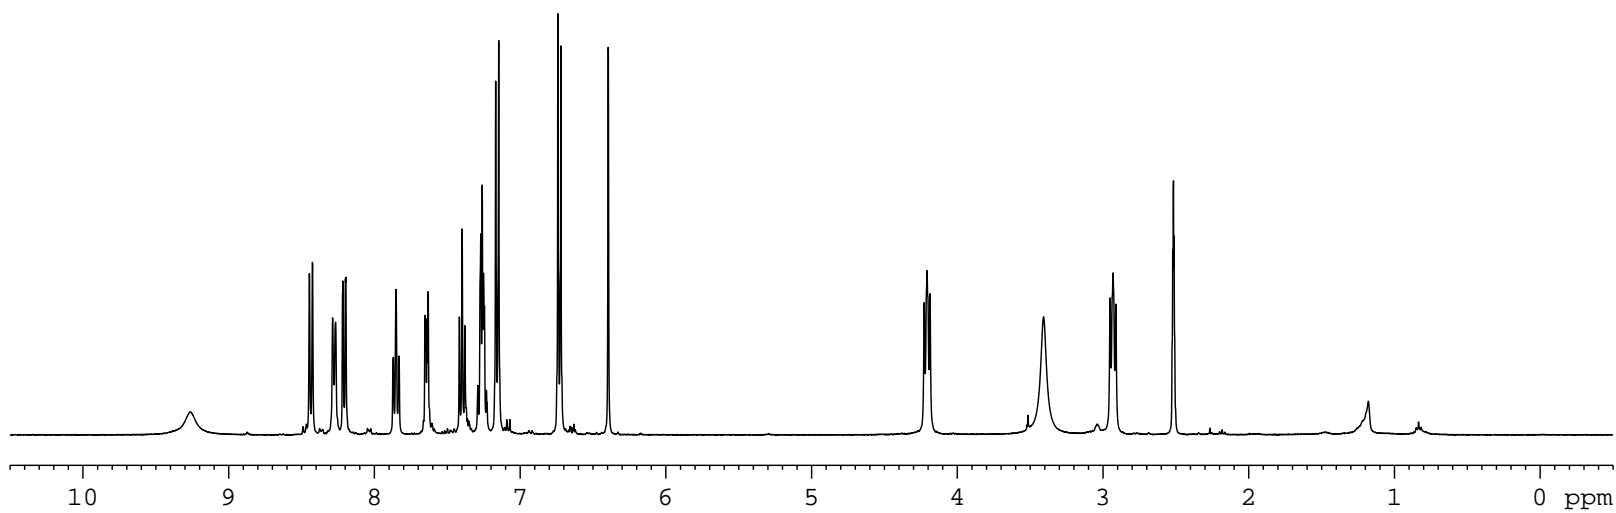

0.797  
0.897  
0.886  
1.022  
1.100  
1.045  
0.897  
1.996  
1.941  
2.020  
0.996  
2.000  
1.987

Current Data Parameters  
NAME Trimurthulu  
EXPNO 273  
PROCNO 1

F2 - Acquisition Parameters  
Date\_ 20130508  
Time 20.59  
INSTRUM spect  
PROBHD 5 mm BBO BB-1H  
PULPROG zg30  
TD 32768  
SOLVENT DMSO  
NS 16  
DS 0  
SWH 7246.377 Hz  
FIDRES 0.221142 Hz  
AQ 2.2611110 sec  
RG 114  
DW 69.000 usec  
DE 6.50 usec  
TE 298.7 K  
D1 2.0000000 sec  
TD0 1

===== CHANNEL f1 =====  
NUC1 1H  
P1 11.90 usec  
PL1 3.00 dB  
SFO1 400.1324008 MHz

F2 - Processing parameters  
SI 16384  
SF 400.1299962 MHz  
WDW EM  
SSB 0  
LB 0 Hz  
GB 0  
PC 1.00

<sup>13</sup>C of Tyrocine

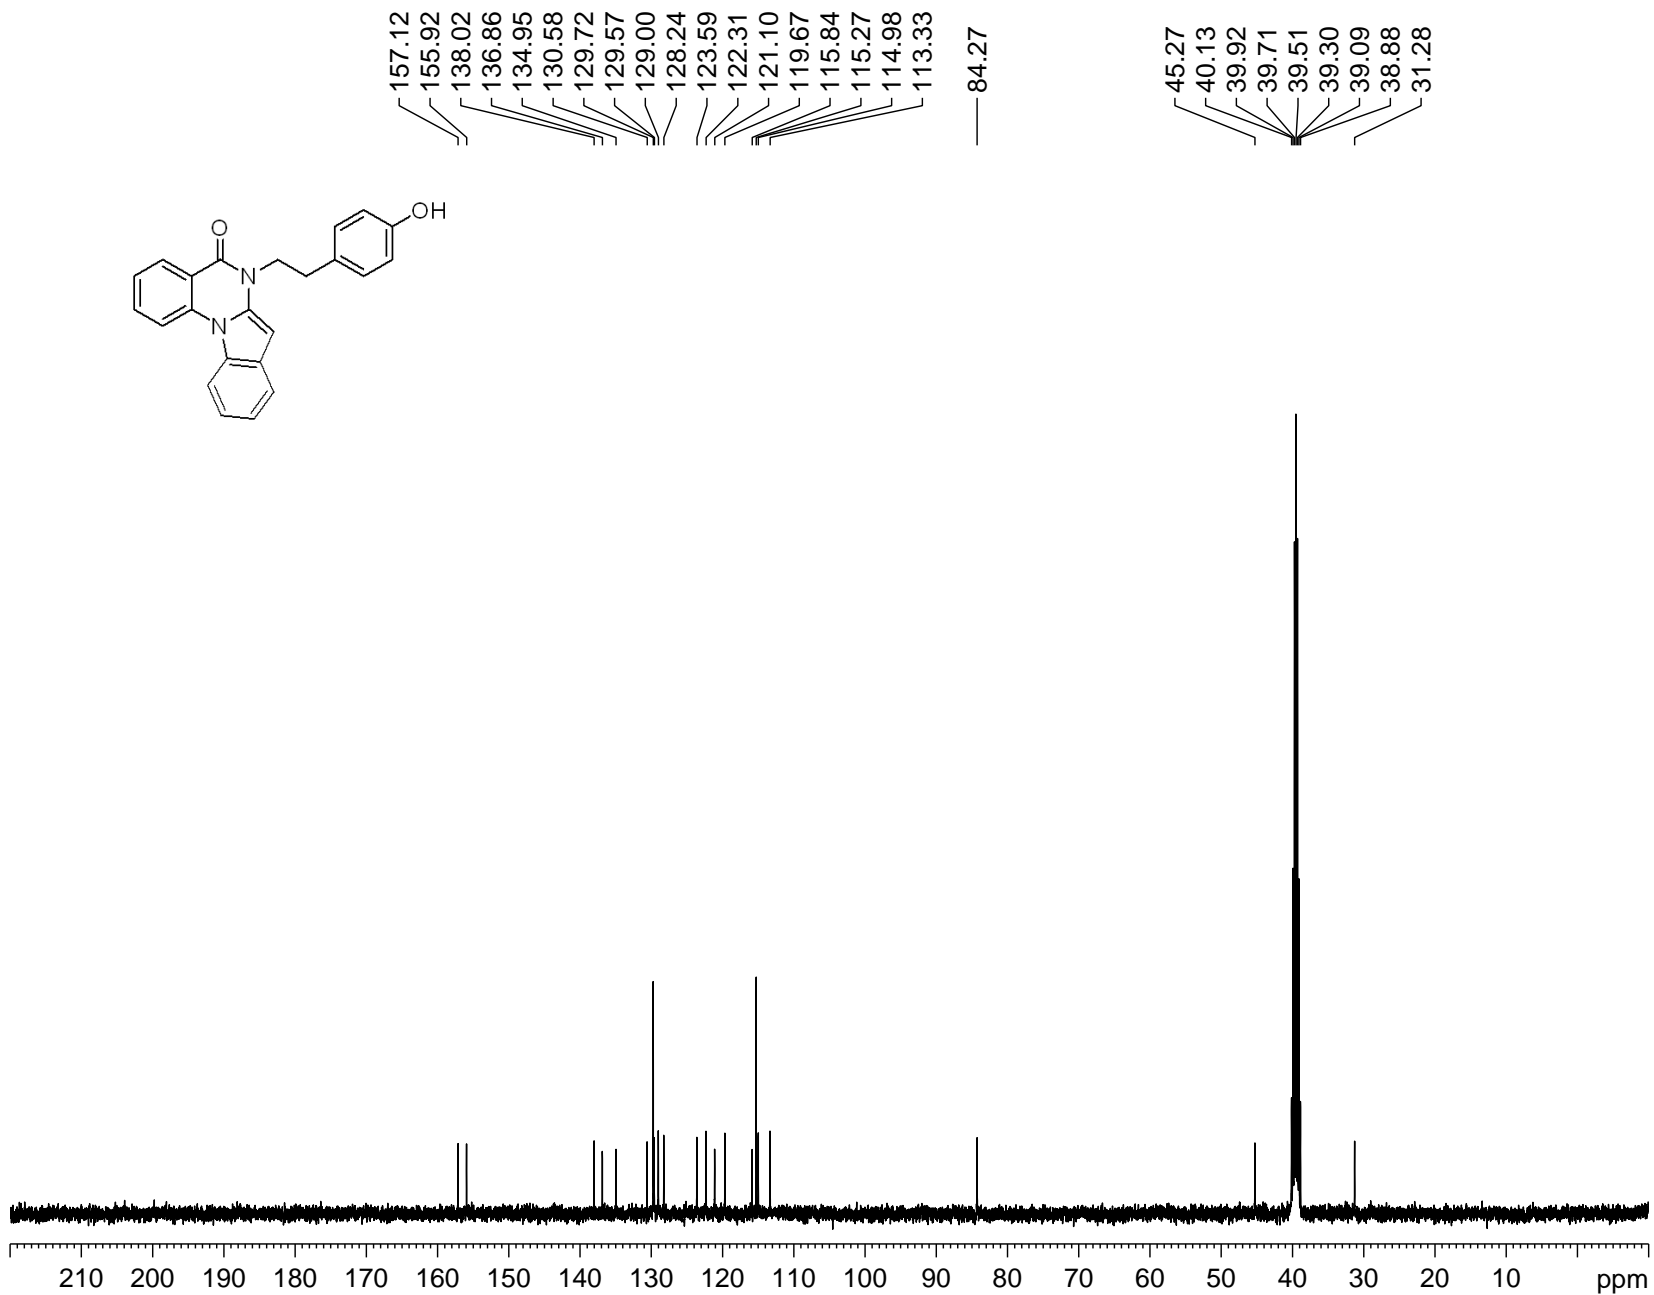

Current Data Parameters

NAME Trimurthulu  
EXPNO 279  
PROCNO 1

F2 - Acquisition Parameters

Date\_ 20130510  
Time 18.57  
INSTRUM spect  
PROBHD 5 mm BBO BB-1H  
PULPROG zgpg30  
TD 32768  
SOLVENT DMSO  
NS 158  
DS 0  
SWH 24038.461 Hz  
FIDRES 0.733596 Hz  
AQ 0.6816452 sec  
RG 32768  
DW 20.800 usec  
DE 6.50 usec  
TE 298.2 K  
D1 2.0000000 sec  
D11 0.03000000 sec  
TD0 1

===== CHANNEL f1 =====

NUC1 13C  
P1 9.40 usec  
PL1 7.00 dB  
SFO1 100.6233325 MHz

===== CHANNEL f2 =====

CPDPRG2 waltz16  
NUC2 1H  
PCPD2 90.00 usec  
PL2 3.00 dB  
PL12 20.70 dB  
PL13 23.70 dB  
SFO2 400.1316005 MHz

F2 - Processing parameters

SI 32768  
SF 100.6128161 MHz  
WDW EM  
SSB 0  
LB 1.00 Hz  
GB 0  
PC 1.00

C spectrum of 5-methoxy indole final

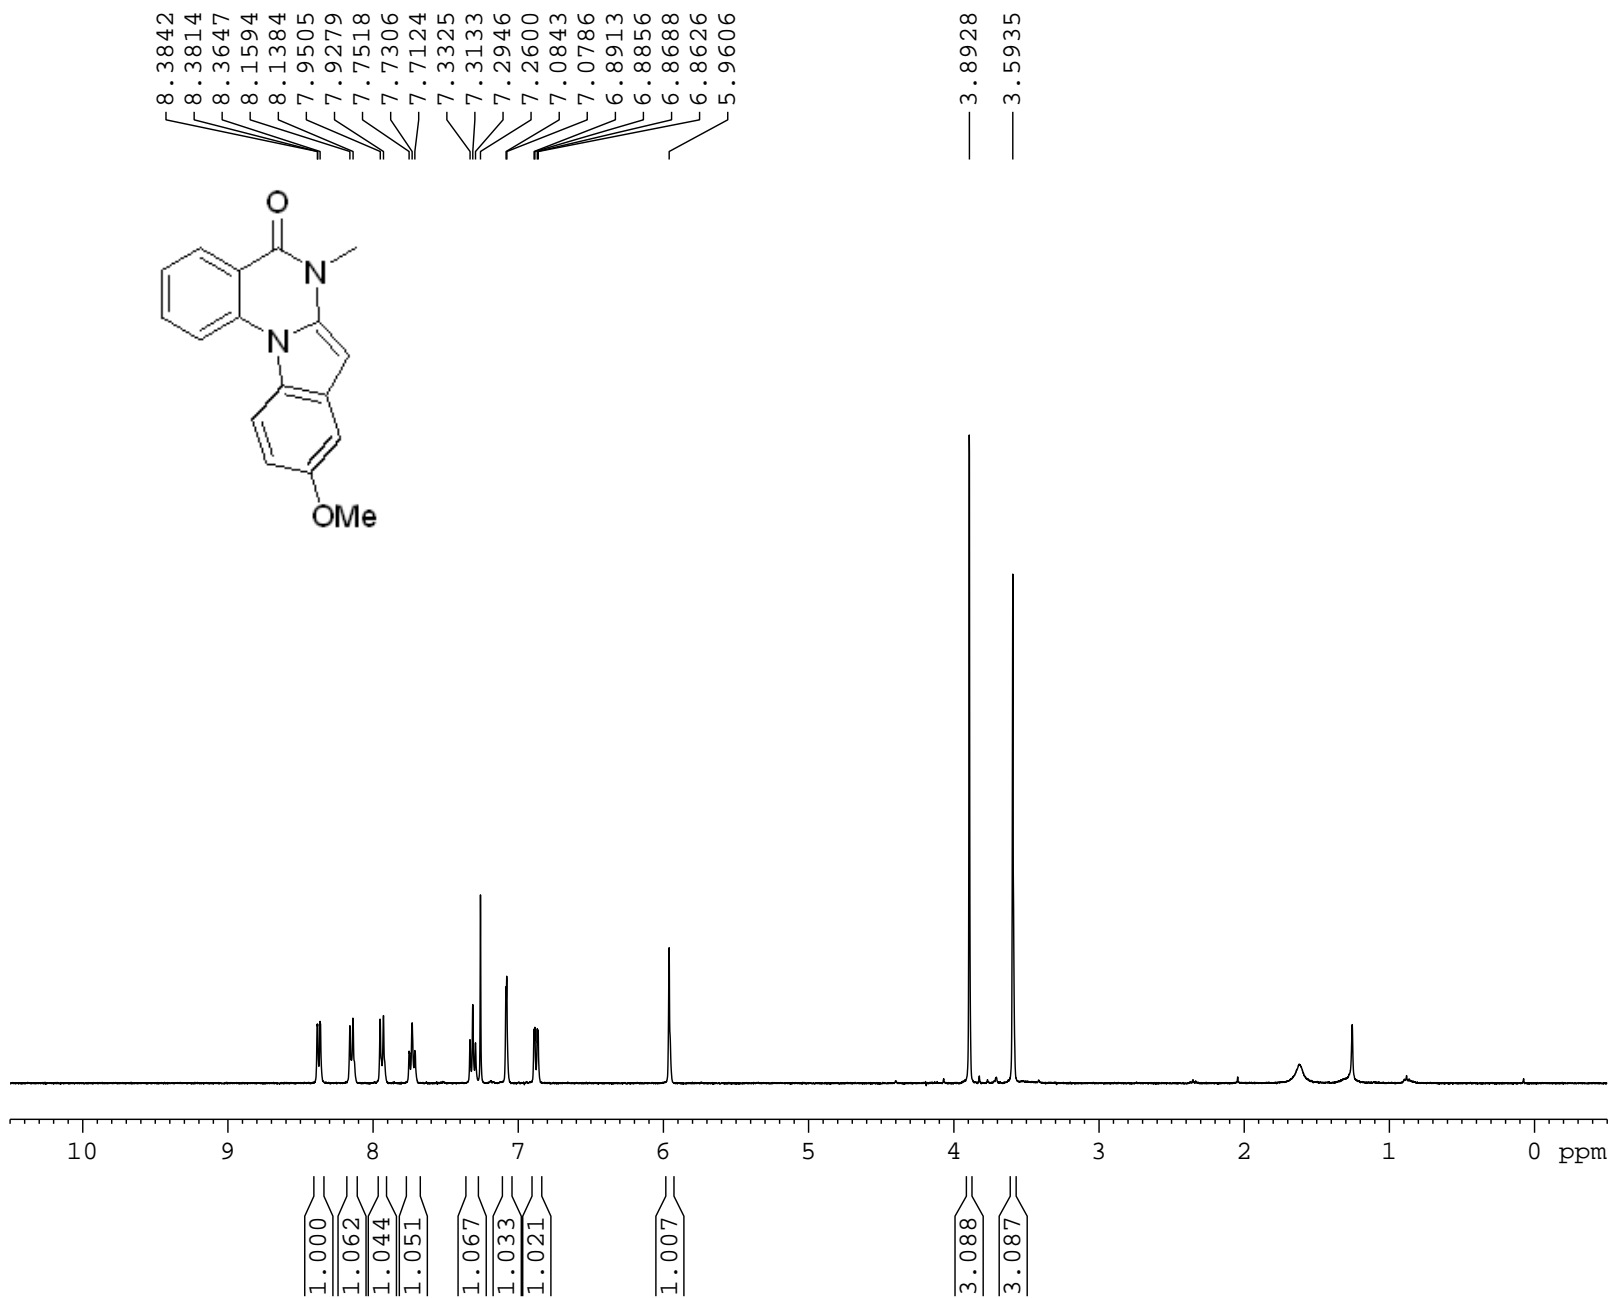

Current Data Parameters  
NAME koti  
EXPNO 10  
PROCNO 1

F2 - Acquisition Parameters  
Date\_ 20120601  
Time 18.07  
INSTRUM spect  
PROBHD 5 mm BBO BB-1H  
PULPROG zg30  
TD 32768  
SOLVENT CDCl3  
NS 32  
DS 0  
SWH 7246.377 Hz  
FIDRES 0.221142 Hz  
AQ 2.2611110 sec  
RG 4  
DW 69.000 usec  
DE 6.50 usec  
TE 298.7 K  
D1 2.0000000 sec  
TD0 1

===== CHANNEL f1 =====  
NUC1 1H  
P1 11.70 usec  
PL1 4.00 dB  
SFO1 400.1324008 MHz

F2 - Processing parameters  
SI 16384  
SF 400.1300087 MHz  
WDW EM  
SSB 0  
LB 0 Hz  
GB 0  
PC 1.00

C spectrum of 5-methoxy indole final

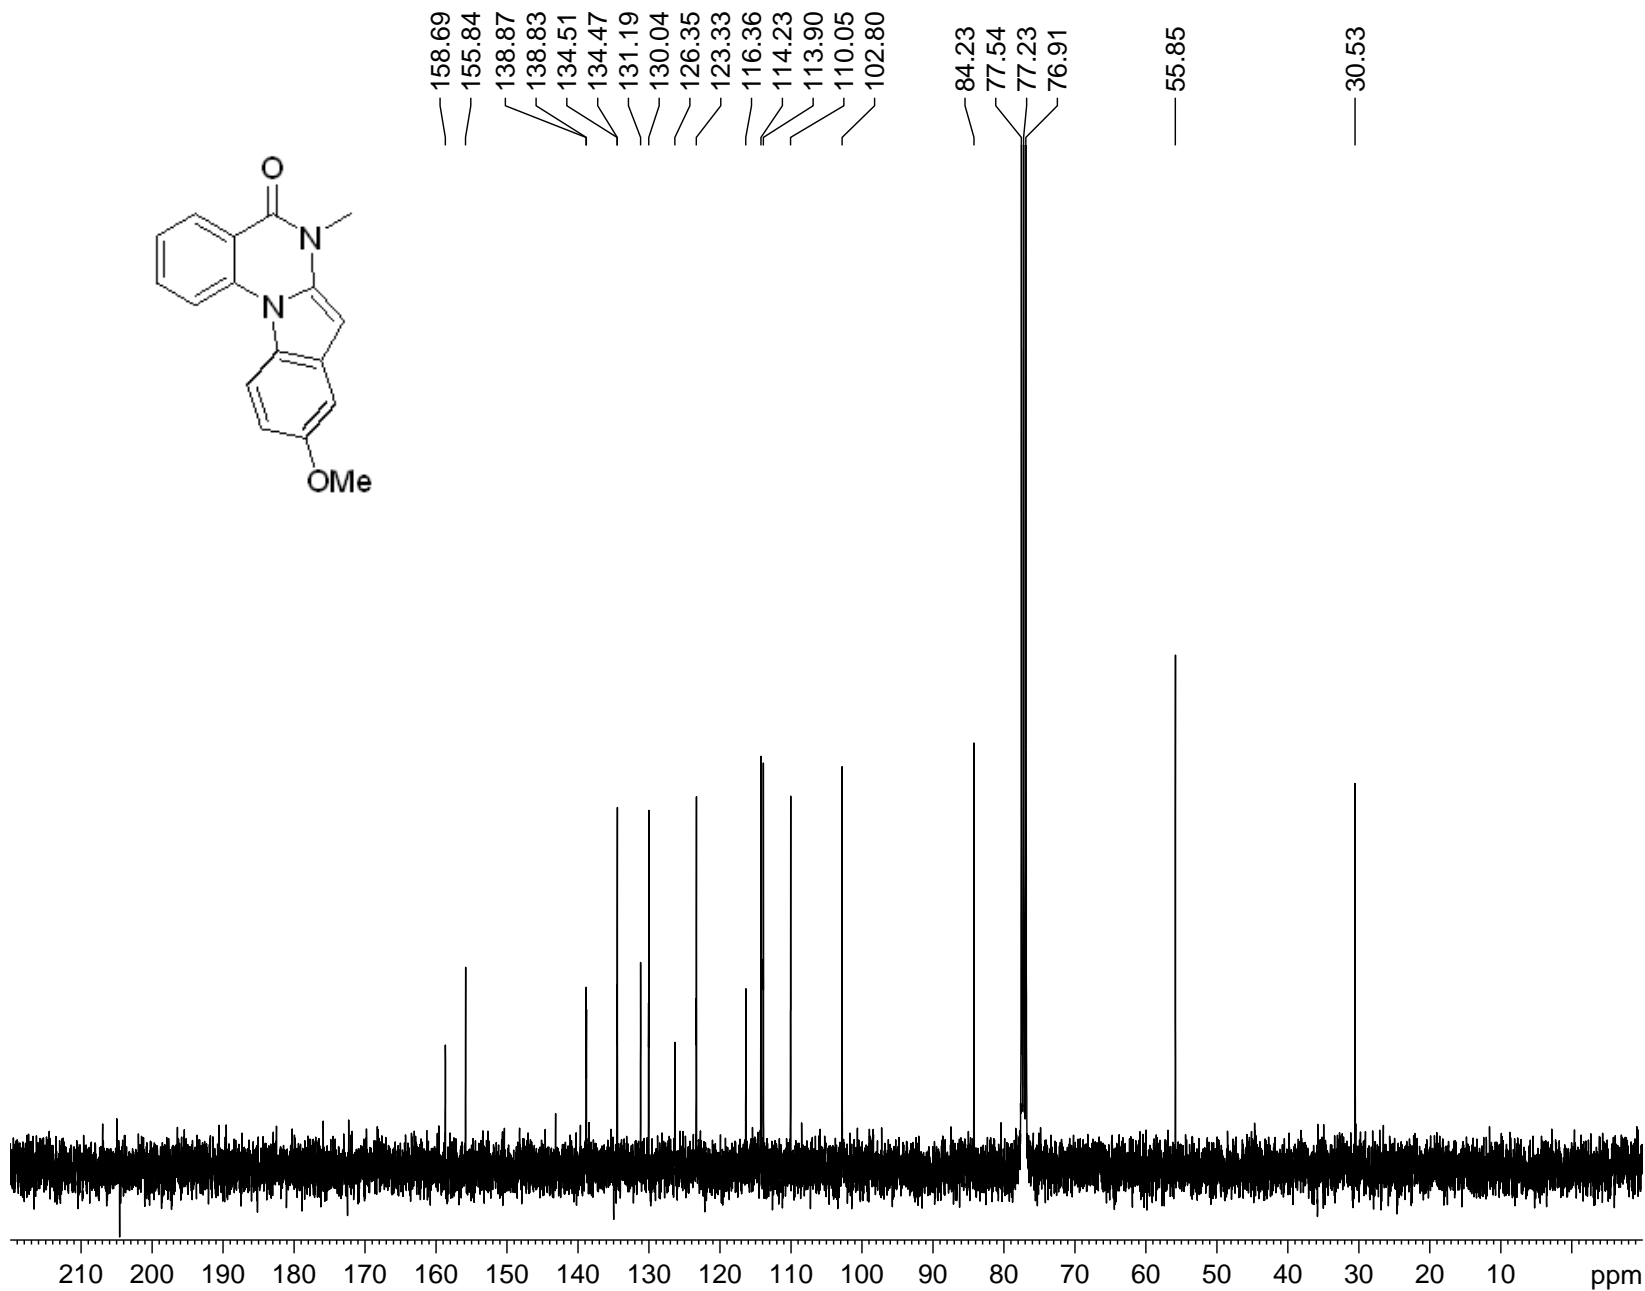

Current Data Parameters

NAME kotj  
EXPNO 11  
PROCNO 1

F2 - Acquisition Parameters

Date\_ 20120601  
Time 18.10  
INSTRUM spect  
PROBHD 5 mm BBO BB-1H  
PULPROG zgpg30  
TD 32768  
SOLVENT CDCl3  
NS 403  
DS 0  
SWH 24038.461 Hz  
FIDRES 0.733596 Hz  
AQ 0.6816452 sec  
RG 8192  
DW 20.800 usec  
DE 6.50 usec  
TE 298.7 K  
D1 2.00000000 sec  
D11 0.03000000 sec  
TD0 1

==== CHANNEL f1 =====

NUC1 13C  
P1 8.90 usec  
PL1 7.00 dB  
SFO1 100.6233325 MHz

==== CHANNEL f2 =====

CPDPRG2 waltz16  
NUC2 1H  
PCPD2 90.00 usec  
PL2 3.80 dB  
PL12 21.60 dB  
PL13 24.60 dB  
SFO2 400.1316005 MHz

F2 - Processing parameters

SI 32768  
SF 100.6127484 MHz  
WDW EM  
SSB 0  
LB 1.00 Hz  
GB 0  
PC 1.00

1H 5-Benzoxo indole -final

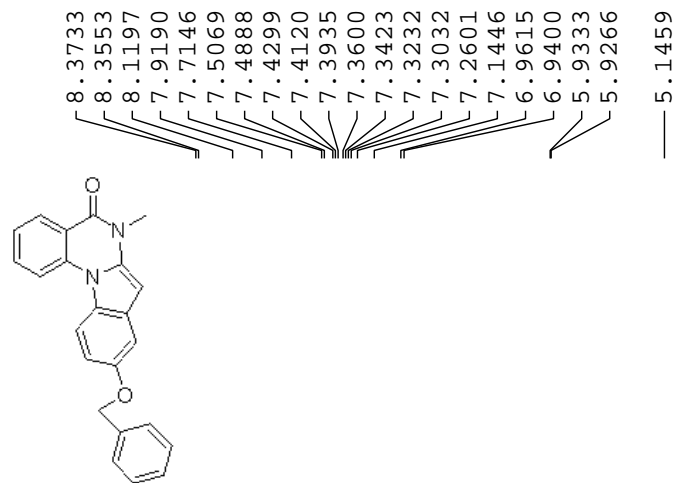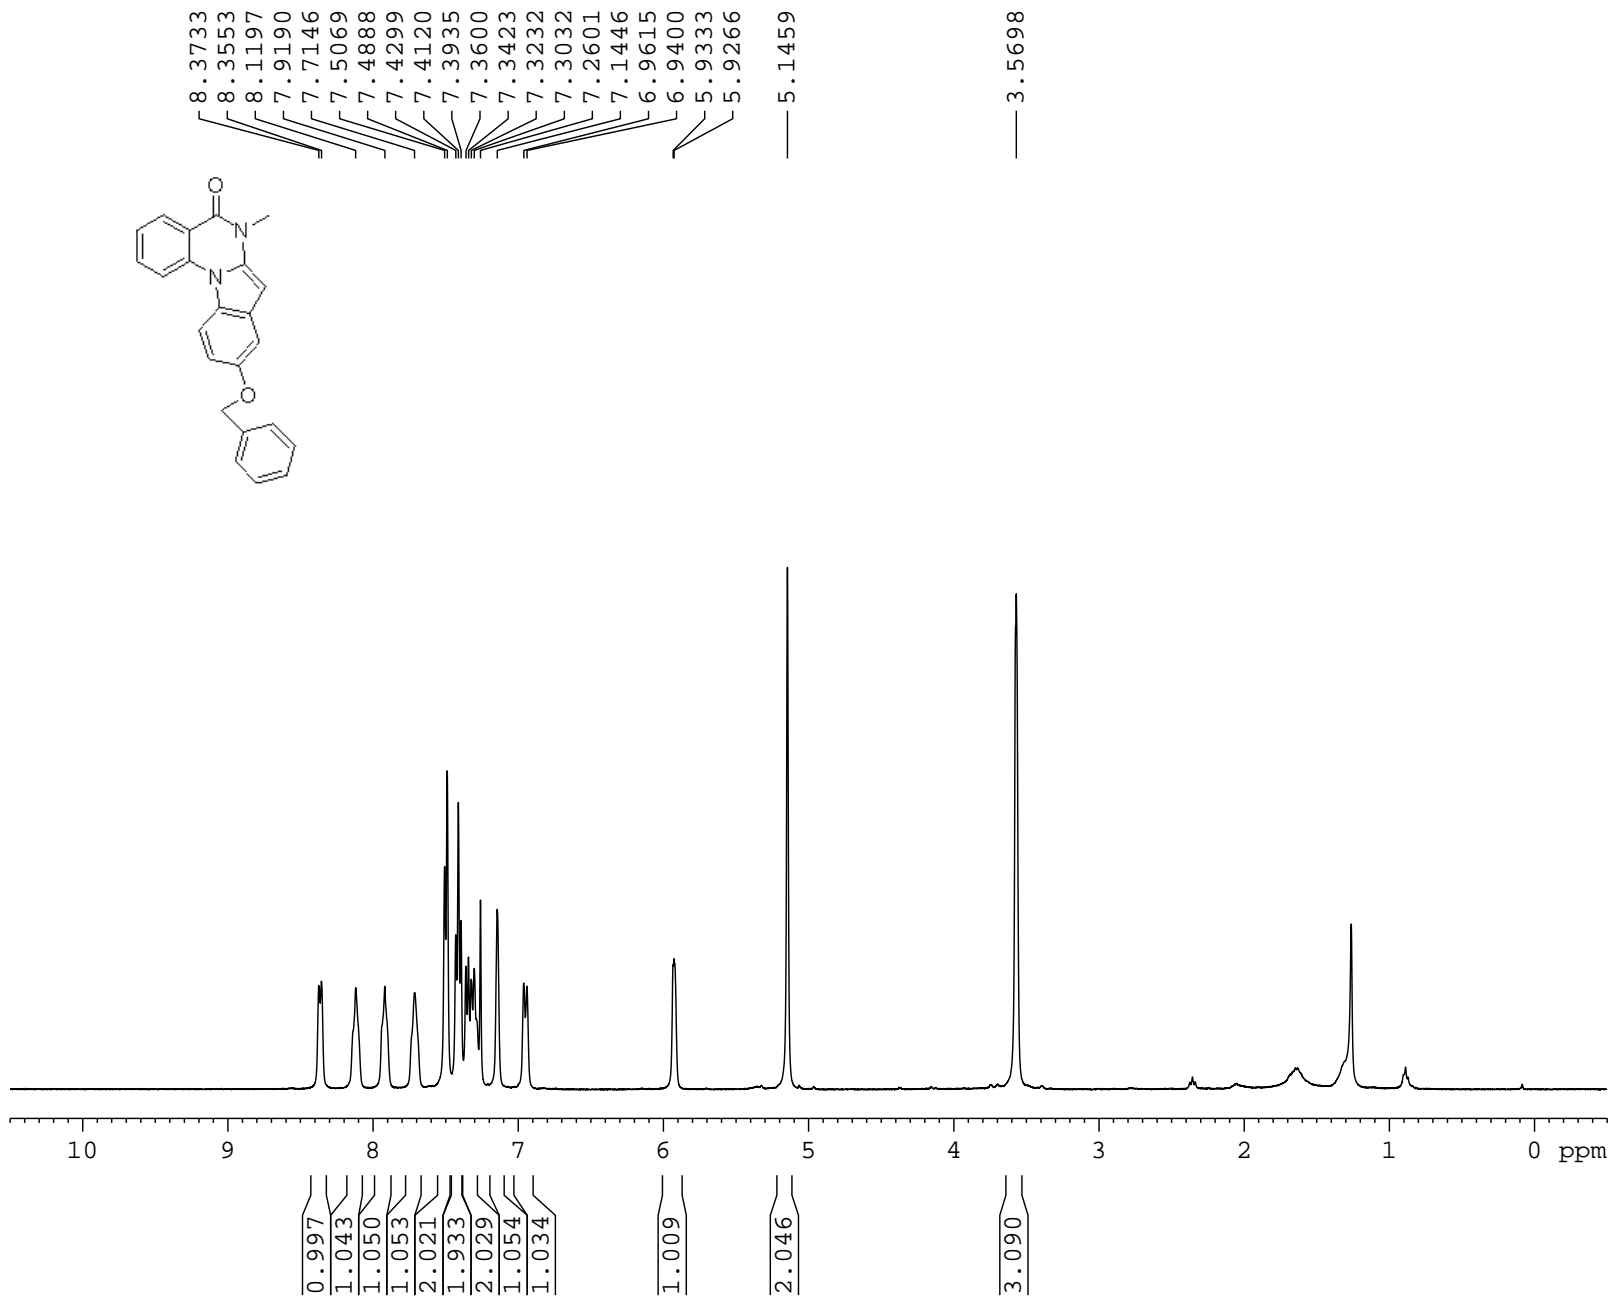

Current Data Parameters  
NAME Trimurthulu  
EXPNO 72  
PROCNO 1

F2 - Acquisition Parameters  
Date\_ 20120530  
Time 18.20  
INSTRUM spect  
PROBHD 5 mm BBO BB-1H  
PULPROG zg30  
TD 32768  
SOLVENT CDCl3  
NS 16  
DS 0  
SWH 7246.377 Hz  
FIDRES 0.221142 Hz  
AQ 2.2611110 sec  
RG 128  
DW 69.000 usec  
DE 6.50 usec  
TE 298.2 K  
D1 2.00000000 sec  
TD0 1

===== CHANNEL f1 =====  
NUC1 1H  
P1 11.70 usec  
PL1 4.00 dB  
SFO1 400.1324008 MHz

F2 - Processing parameters  
SI 16384  
SF 400.1300081 MHz  
WDW EM  
SSB 0  
LB 0 Hz  
GB 0  
PC 1.00

13C

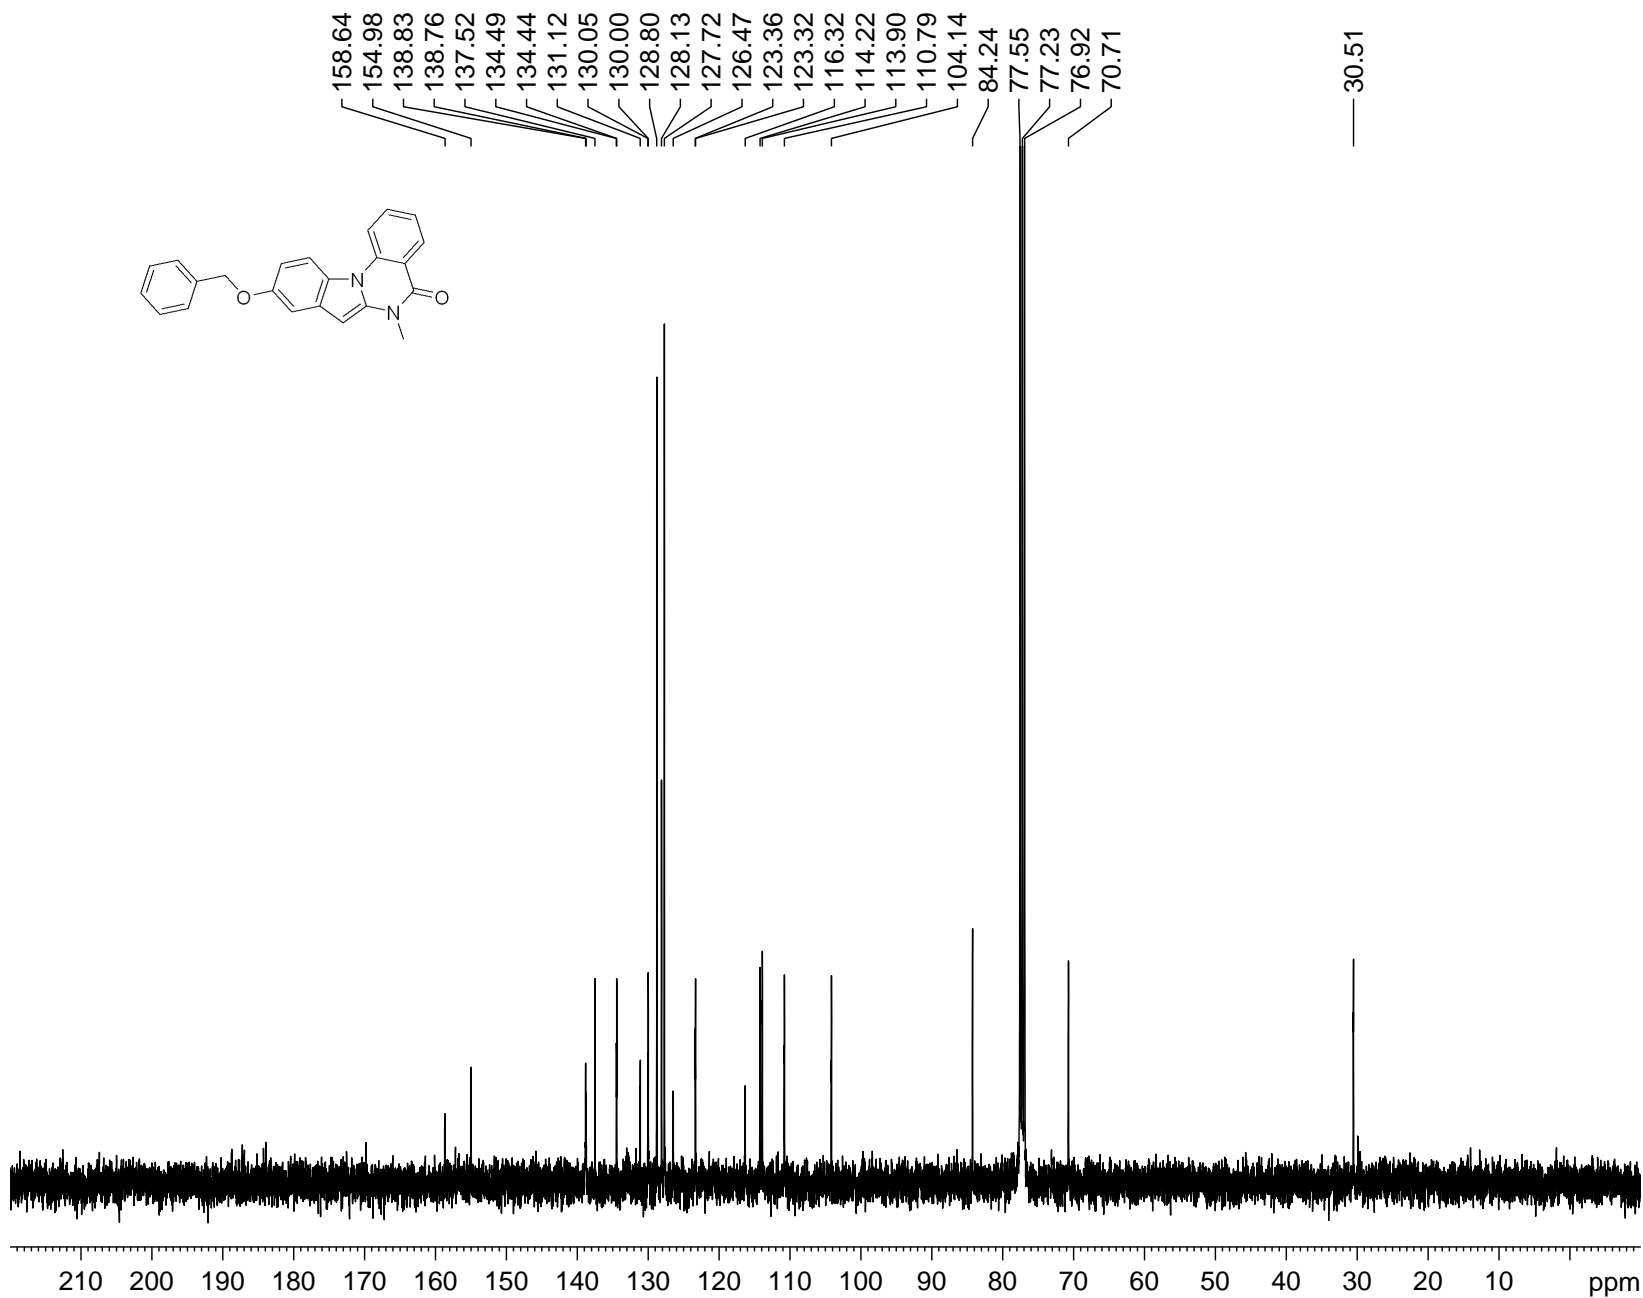

Current Data Parameters

NAME Trimurthulu  
EXPNO 73  
PROCNO 1

F2 - Acquisition Parameters

Date\_ 20120530  
Time 18.24  
INSTRUM spect  
PROBHD 5 mm BBO BB-1H  
PULPROG zgpg30  
TD 32768  
SOLVENT CDCl3  
NS 378  
DS 0  
SWH 24038.461 Hz  
FIDRES 0.733596 Hz  
AQ 0.6816452 sec  
RG 32768  
DW 20.800 usec  
DE 6.50 usec  
TE 298.5 K  
D1 2.00000000 sec  
D11 0.03000000 sec  
TD0 1

===== CHANNEL f1 =====

NUC1 13C  
P1 8.90 usec  
PL1 7.00 dB  
SFO1 100.6233325 MHz

===== CHANNEL f2 =====

CPDPRG2 waltz16  
NUC2 1H  
PCPD2 90.00 usec  
PL2 3.80 dB  
PL12 21.60 dB  
PL13 24.60 dB  
SFO2 400.1316005 MHz

F2 - Processing parameters

SI 32768  
SF 100.6127492 MHz  
WDW EM  
SSB 0  
LB 1.00 Hz  
GB 0  
PC 1.00



1H 5-chloro indole-Final

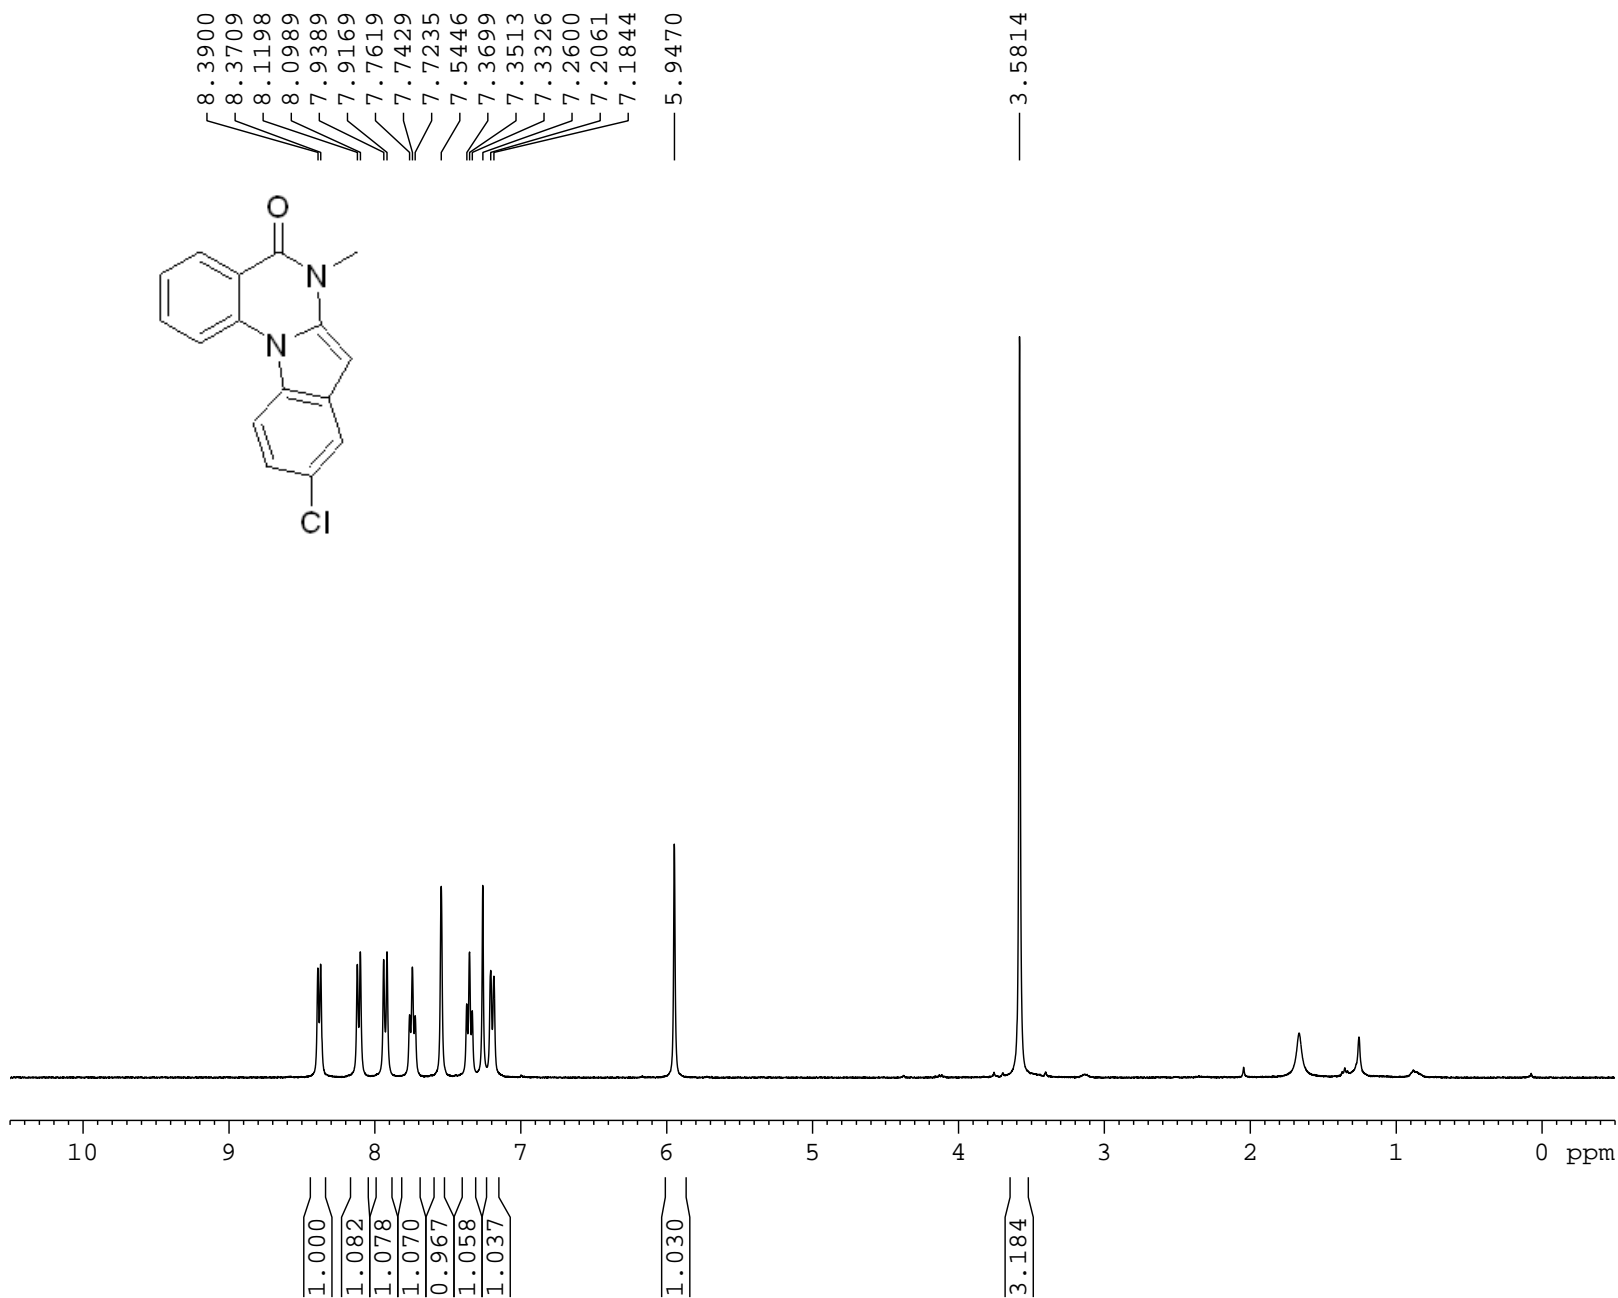

Current Data Parameters  
NAME Trimurthulu  
EXPNO 77  
PROCNO 1

F2 - Acquisition Parameters  
Date\_ 20120530  
Time 18.58  
INSTRUM spect  
PROBHD 5 mm BBO BB-1H  
PULPROG zg30  
TD 32768  
SOLVENT CDCl3  
NS 16  
DS 0  
SWH 7246.377 Hz  
FIDRES 0.221142 Hz  
AQ 2.2611110 sec  
RG 181  
DW 69.000 usec  
DE 6.50 usec  
TE 298.2 K  
D1 2.00000000 sec  
TD0 1

===== CHANNEL f1 =====  
NUC1 1H  
P1 11.70 usec  
PL1 4.00 dB  
SFO1 400.1324008 MHz

F2 - Processing parameters  
SI 16384  
SF 400.1300081 MHz  
WDW EM  
SSB 0  
LB 0 Hz  
GB 0  
PC 1.00

13C

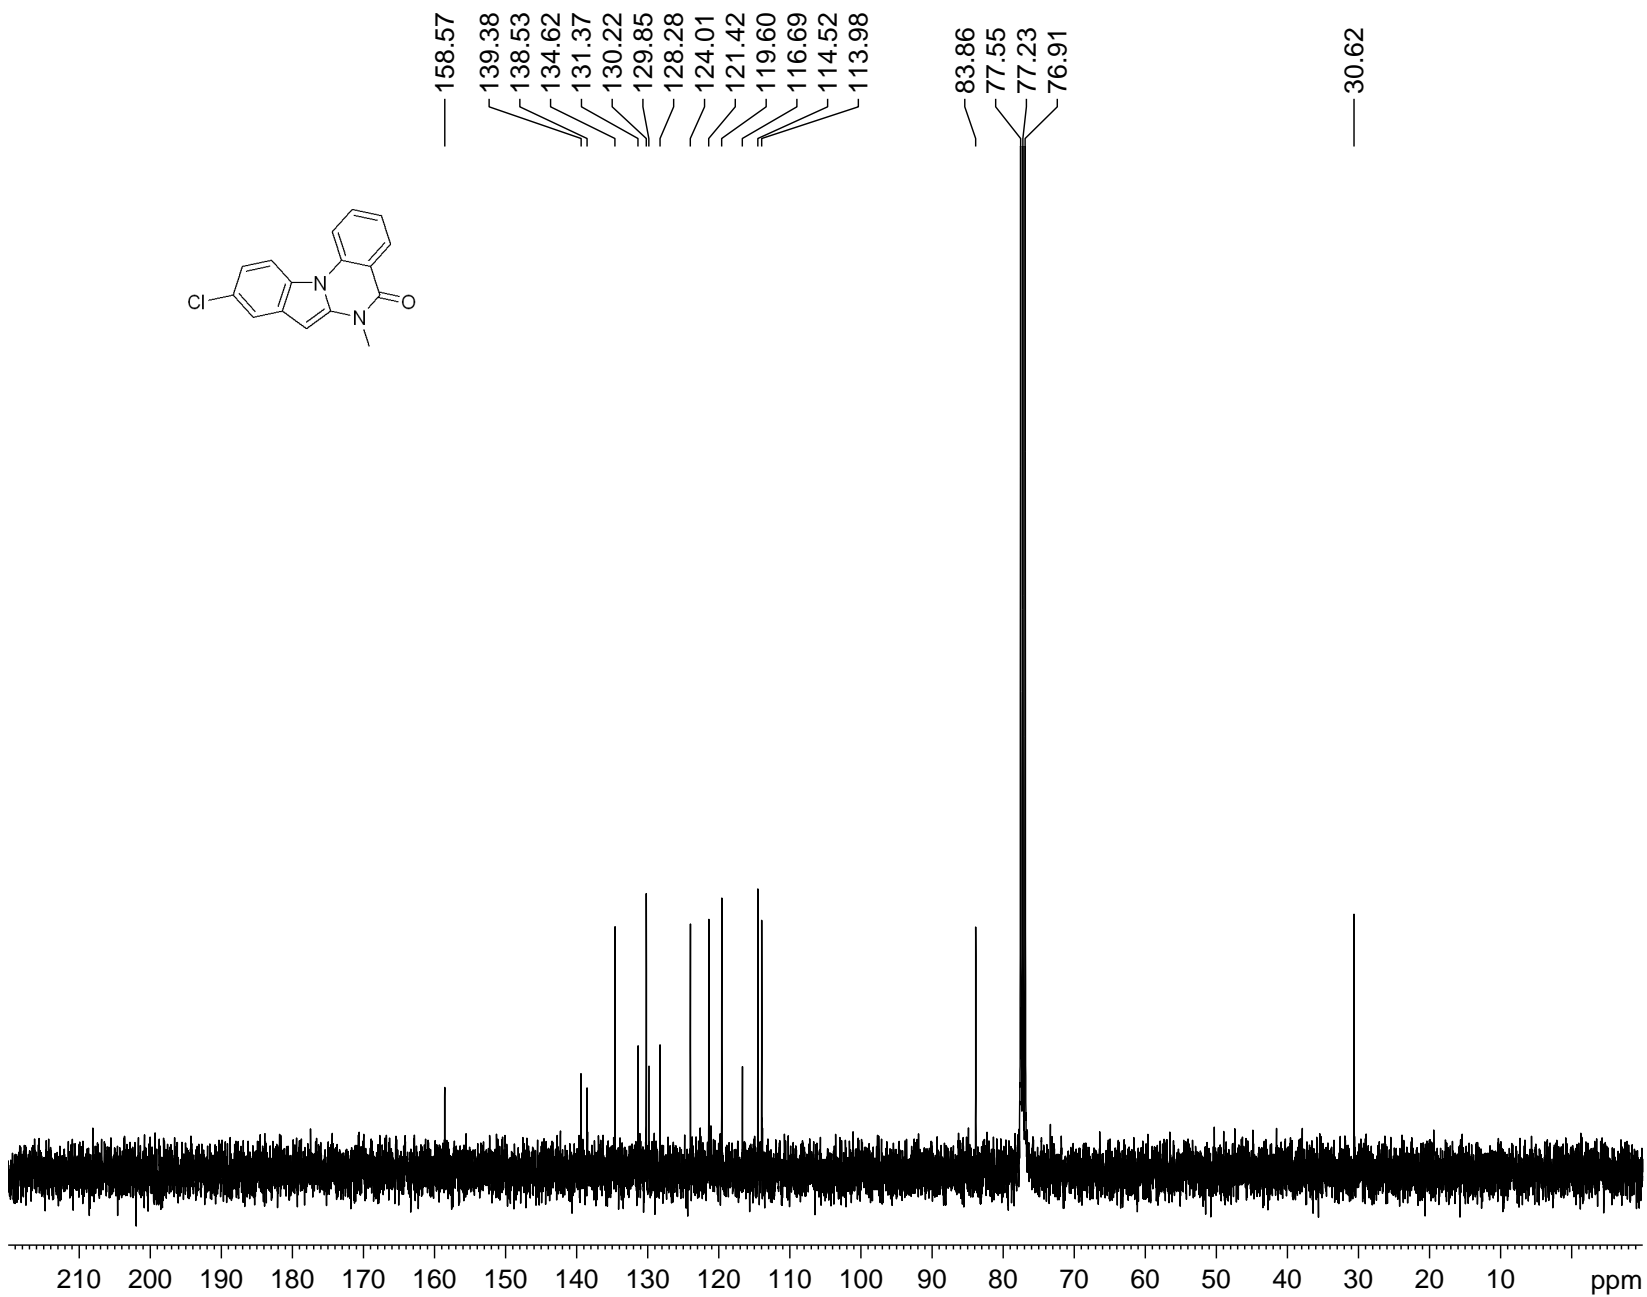

NAME Trimurthulu  
EXPNO 78  
PROCNO 1  
Date\_ 20120530  
Time 19.06  
INSTRUM spect  
PROBHD 5 mm BBO BB-1H  
PULPROG zgpg30  
TD 32768  
SOLVENT CDCl3  
NS 208  
DS 0  
SWH 24038.461 Hz  
FIDRES 0.733596 Hz  
AQ 0.6816452 sec  
RG 32768  
DW 20.800 usec  
DE 6.50 usec  
TE 298.7 K  
D1 2.00000000 sec  
D11 0.03000000 sec  
TD0 1

===== CHANNEL f1 =====  
NUC1 13C  
P1 8.90 usec  
PL1 7.00 dB  
SFO1 100.6233325 MHz

===== CHANNEL f2 =====  
CPDPRG2 waltz16  
NUC2 1H  
PCPD2 90.00 usec  
PL2 3.80 dB  
PL12 21.60 dB  
PL13 24.60 dB  
SFO2 400.1316005 MHz  
SI 32768  
SF 100.6127478 MHz  
WDW EM  
SSB 0  
LB 1.00 Hz  
GB 0  
PC 1.00

1h of 5-bromo indole final

8.3993  
8.3964  
8.3796  
8.3767  
8.1375  
8.1164  
7.9135  
7.8914  
7.7763  
7.7731  
7.7552  
7.7372  
7.7340  
7.7163  
7.7119  
7.3802  
7.3611  
7.3505  
7.3452  
7.3284  
7.3236  
7.2604  
5.9623

3.5925

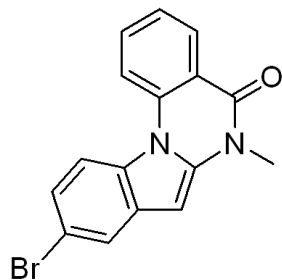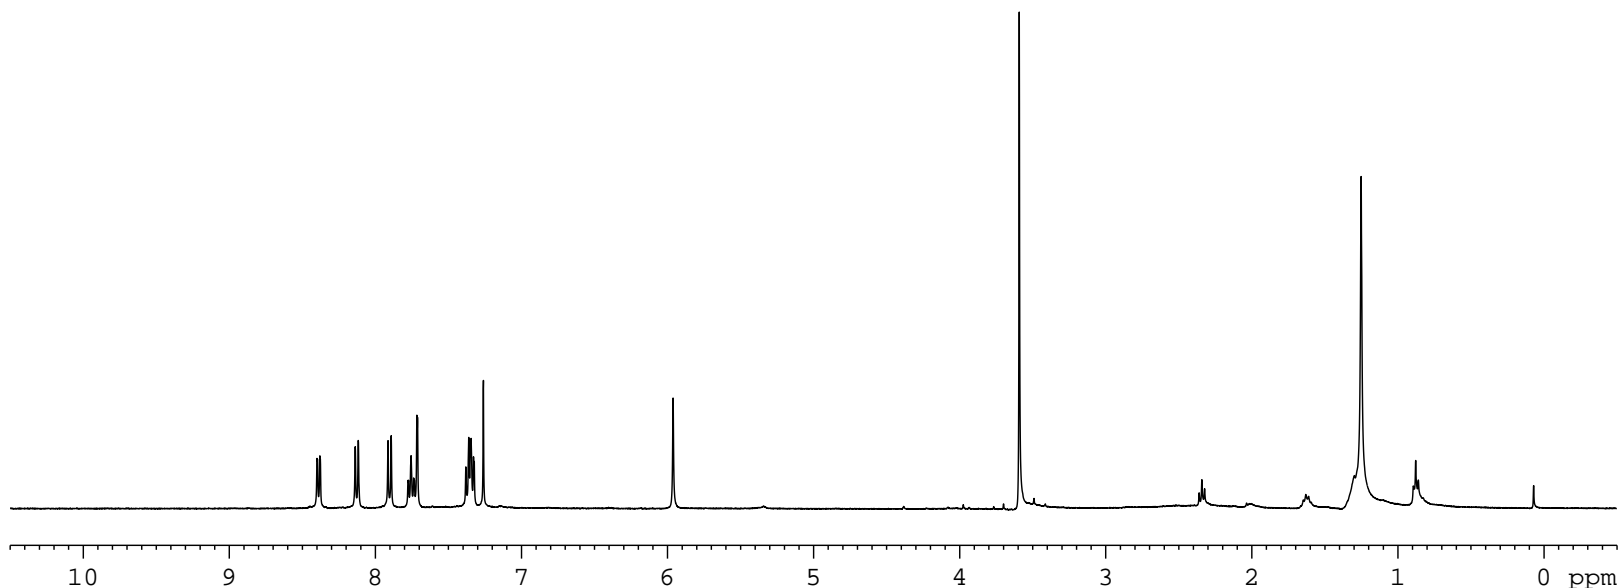

Current Data Parameters  
NAME Trimurthulu  
EXPNO 280  
PROCNO 1

F2 - Acquisition Parameters  
Date\_ 20130511  
Time 21.13  
INSTRUM spect  
PROBHD 5 mm BBO BB-1H  
PULPROG zg30  
TD 32768  
SOLVENT CDCl3  
NS 16  
DS 0  
SWH 7246.377 Hz  
FIDRES 0.221142 Hz  
AQ 2.2611110 sec  
RG 181  
DW 69.000 usec  
DE 6.50 usec  
TE 297.9 K  
D1 2.0000000 sec  
TD0 1

===== CHANNEL f1 =====  
NUC1 1H  
P1 11.90 usec  
PL1 3.00 dB  
SFO1 400.1324008 MHz

F2 - Processing parameters  
SI 16384  
SF 400.1300091 MHz  
WDW EM  
SSB 0  
LB 0 Hz  
GB 0  
PC 1.00

13c of 5-bromo indole final

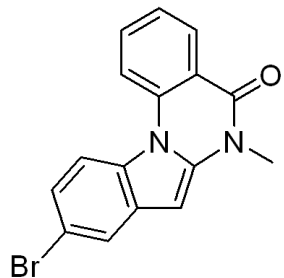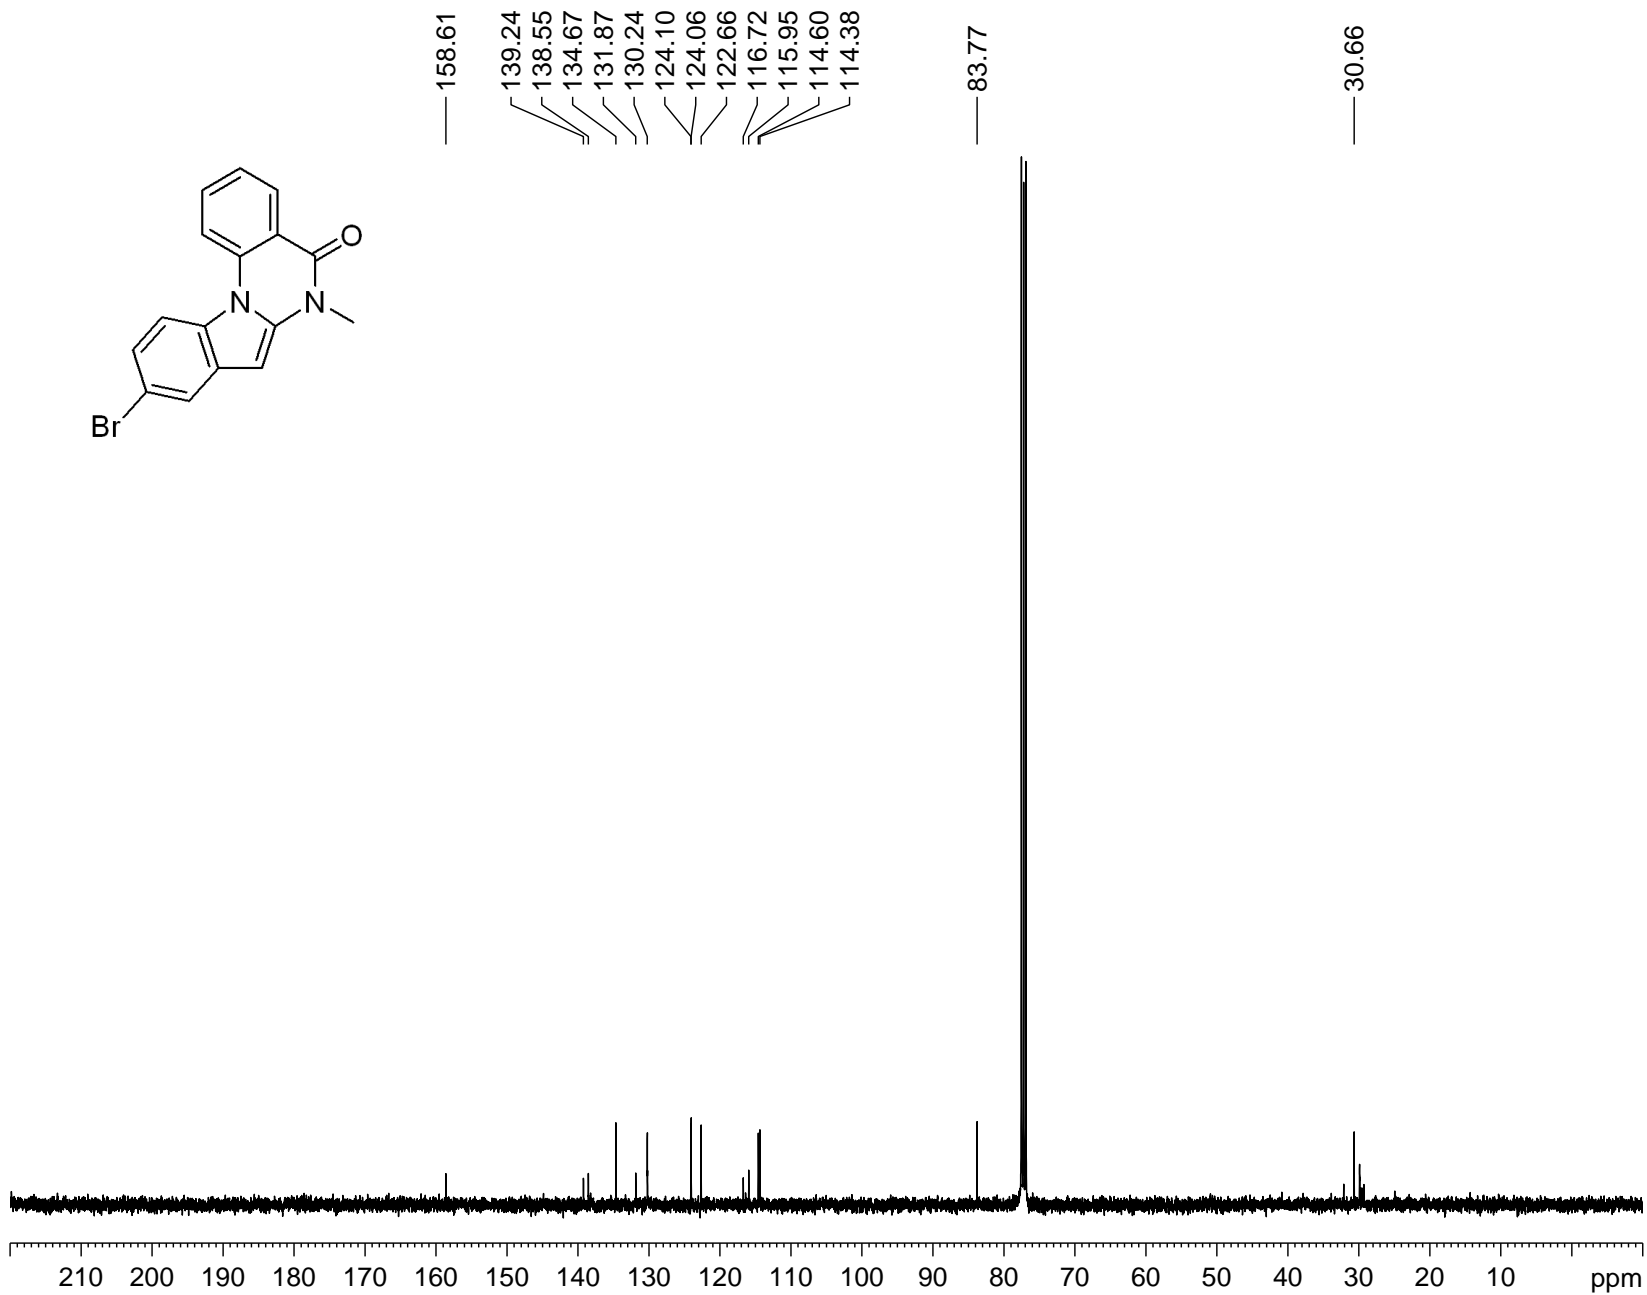

Current Data Parameters

NAME Trimurthulu  
EXPNO 281  
PROCNO 1

F2 - Acquisition Parameters

Date\_ 20130511  
Time 21.15  
INSTRUM spect  
PROBHD 5 mm BBO BB-1H  
PULPROG zgpg30  
TD 32768  
SOLVENT CDCl3  
NS 478  
DS 0  
SWH 24038.461 Hz  
FIDRES 0.733596 Hz  
AQ 0.6816452 sec  
RG 32768  
DW 20.800 usec  
DE 6.50 usec  
TE 297.9 K  
D1 2.00000000 sec  
D11 0.03000000 sec  
TD0 1

===== CHANNEL f1 =====

NUC1 13C  
P1 9.40 usec  
PL1 7.00 dB  
SFO1 100.6233325 MHz

===== CHANNEL f2 =====

CPDPRG2 waltz16  
NUC2 1H  
PCPD2 90.00 usec  
PL2 3.00 dB  
PL12 20.70 dB  
PL13 23.70 dB  
SFO2 400.1316005 MHz

F2 - Processing parameters

SI 32768  
SF 100.6127486 MHz  
WDW EM  
SSB 0  
LB 1.00 Hz  
GB 0  
PC 1.00

<sup>1</sup>H of P-Cl Amide

8.2955  
8.2913  
8.0597  
8.0391  
7.6355  
7.6180  
7.6139  
7.6022  
7.5985  
7.5927  
7.5709  
7.5676  
7.5531  
7.4821  
7.4746  
7.4711  
7.4643  
7.4590  
7.4532  
7.3387  
7.3345  
7.3230  
7.3178  
7.3134  
7.3032  
7.2991  
7.2876  
7.2857  
7.2687  
7.2601  
7.2510  
5.5048

1.5942

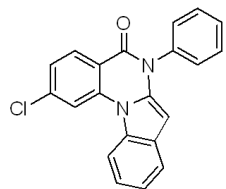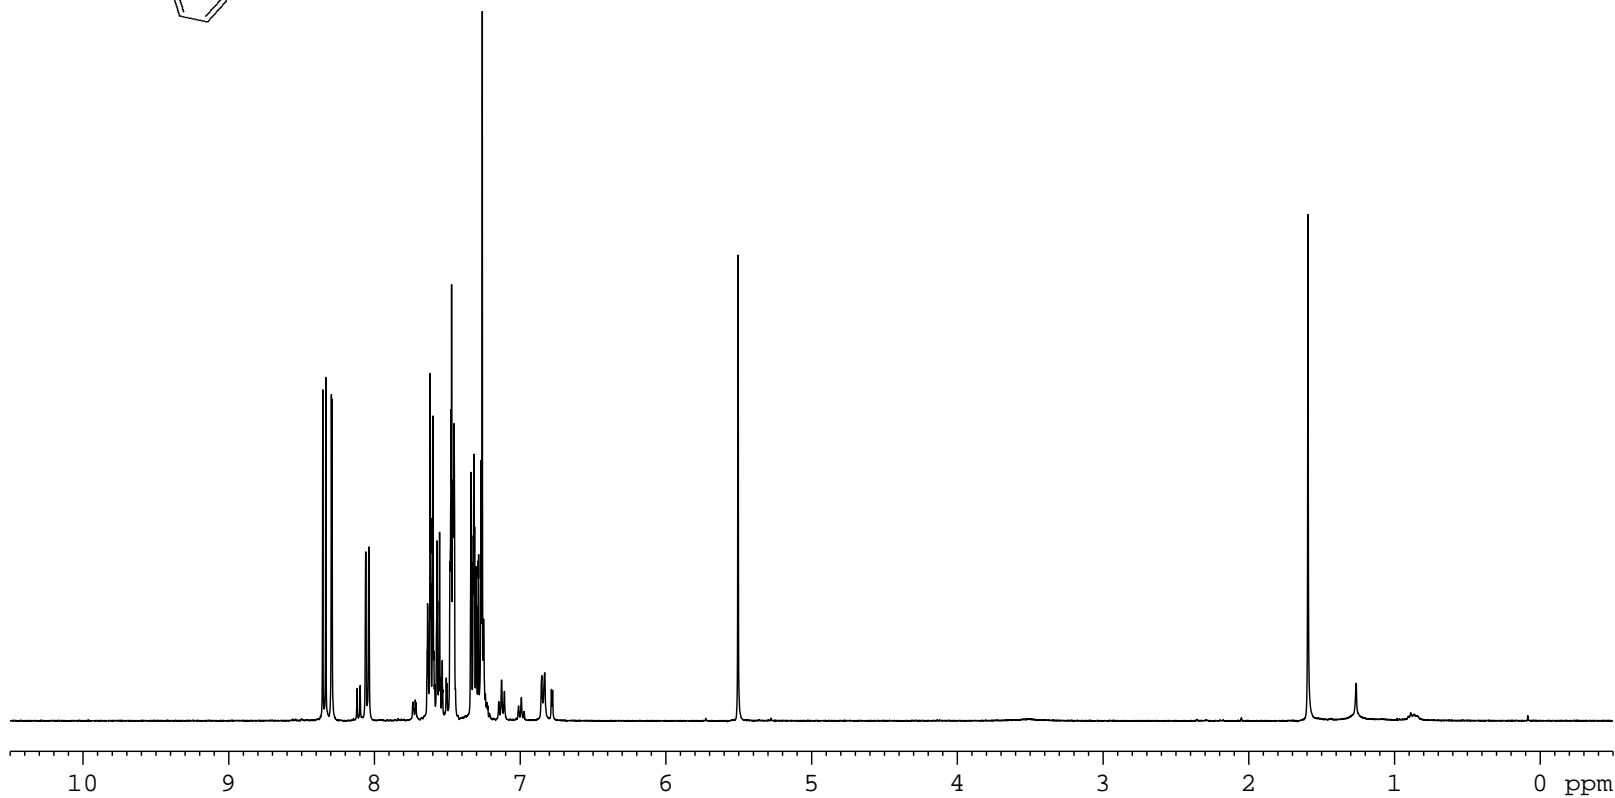

1.000  
1.037  
1.025  
2.099  
0.924  
3.057  
2.035  
1.735

1.009

Current Data Parameters  
NAME Trimurthulu  
EXPNO 276  
PROCNO 1

F2 - Acquisition Parameters  
Date\_ 20130510  
Time 18.39  
INSTRUM spect  
PROBHD 5 mm BBO BB-1H  
PULPROG zg30  
TD 32768  
SOLVENT CDCl3  
NS 16  
DS 0  
SWH 7246.377 Hz  
FIDRES 0.221142 Hz  
AQ 2.2611110 sec  
RG 181  
DW 69.000 usec  
DE 6.50 usec  
TE 298.3 K  
D1 2.00000000 sec  
TD0 1

===== CHANNEL f1 =====  
NUC1 1H  
P1 11.90 usec  
PL1 3.00 dB  
SFO1 400.1324008 MHz

F2 - Processing parameters  
SI 16384  
SF 400.1300091 MHz  
WDW EM  
SSB 0  
LB 0 Hz  
GB 0  
PC 1.00

<sup>13</sup>C of P-Cl Amide

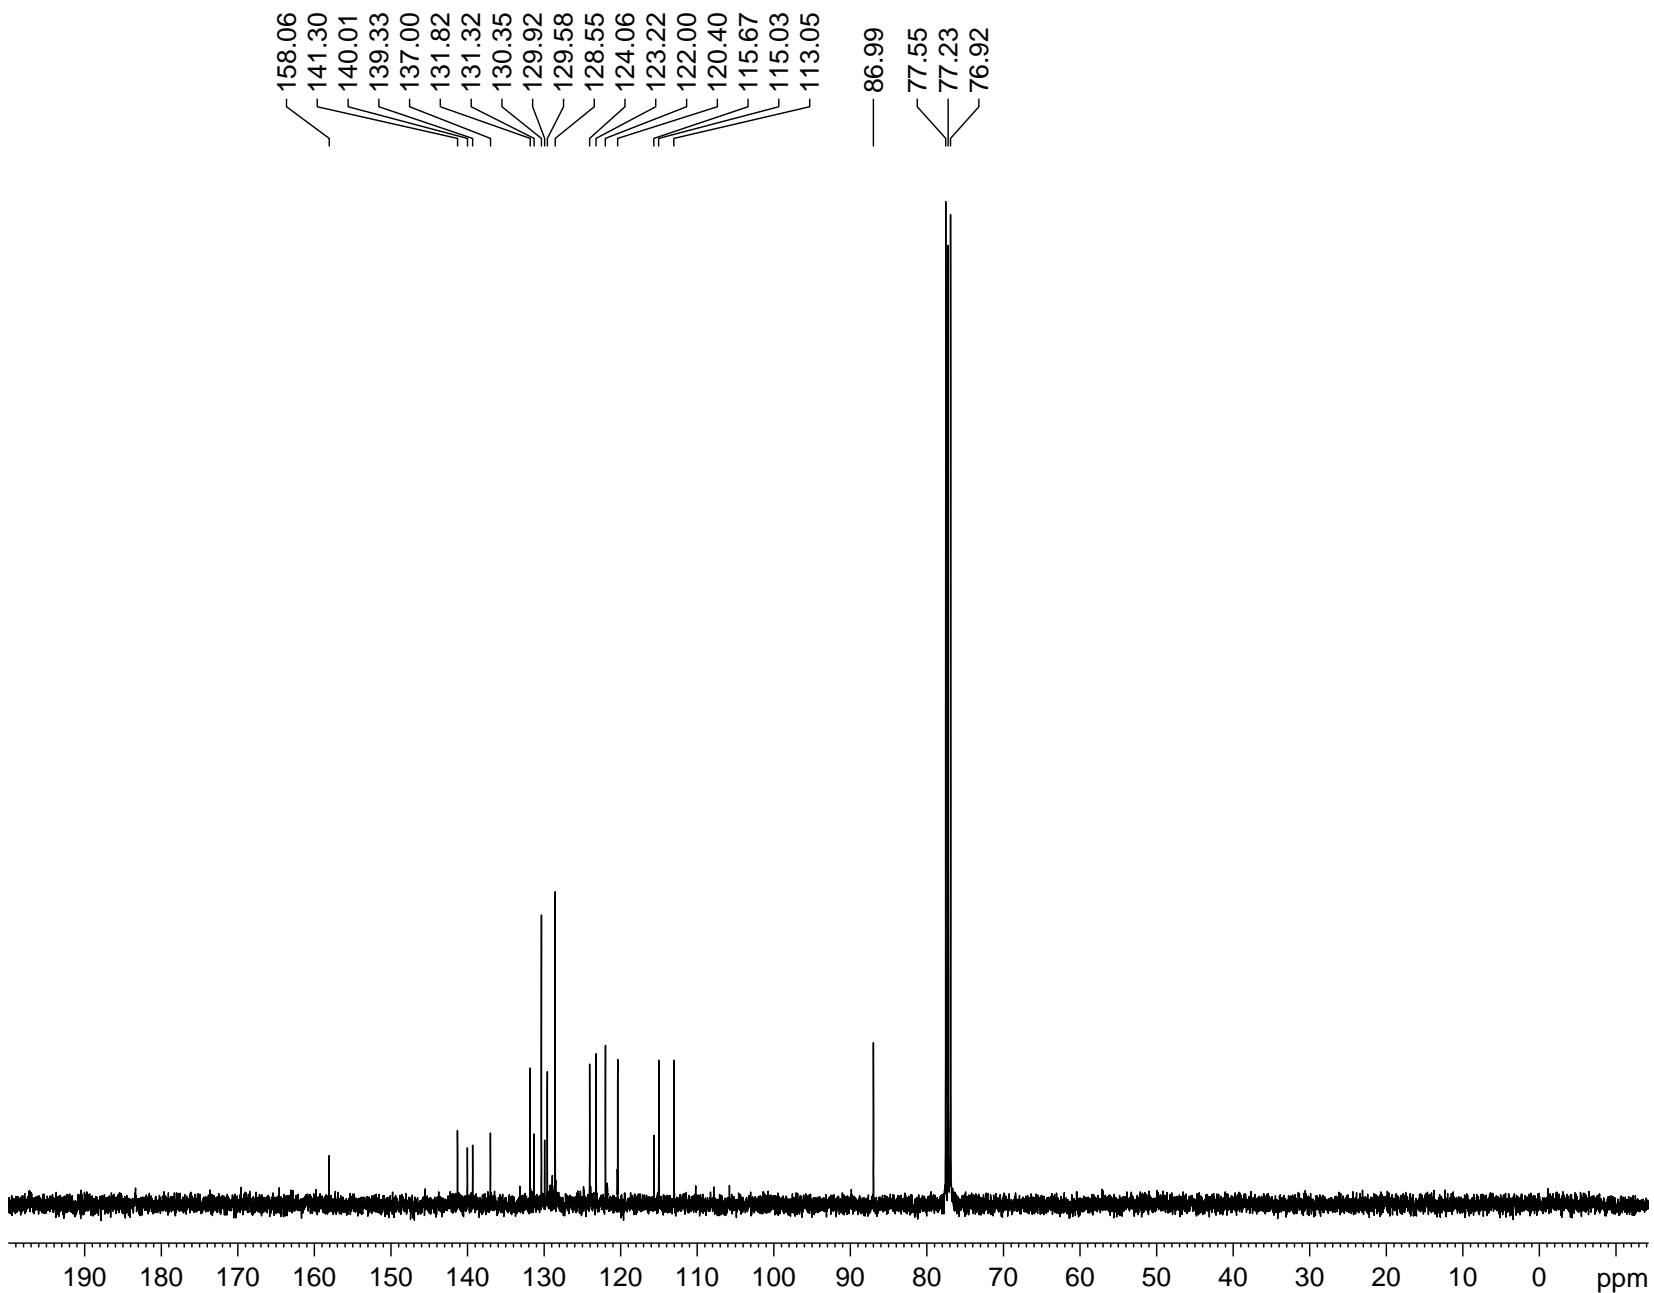

Current Data Parameters

NAME Trimurthulu  
EXPNO 277  
PROCNO 1

F2 - Acquisition Parameters

Date\_ 20130510  
Time 18.41  
INSTRUM spect  
PROBHD 5 mm BBO BB-1H  
PULPROG zgpg30  
TD 32768  
SOLVENT CDCl3  
NS 201  
DS 0  
SWH 24038.461 Hz  
FIDRES 0.733596 Hz  
AQ 0.6816452 sec  
RG 32768  
DW 20.800 usec  
DE 6.50 usec  
TE 298.3 K  
D1 2.00000000 sec  
D11 0.03000000 sec  
TD0 1

===== CHANNEL f1 =====

NUC1 13C  
P1 9.40 usec  
PL1 7.00 dB  
SFO1 100.6233325 MHz

===== CHANNEL f2 =====

CPDPRG2 waltz16  
NUC2 1H  
PCPD2 90.00 usec  
PL2 3.00 dB  
PL12 20.70 dB  
PL13 23.70 dB  
SFO2 400.1316005 MHz

F2 - Processing parameters

SI 32768  
SF 100.6127492 MHz  
WDW EM  
SSB 0  
LB 1.00 Hz  
GB 0  
PC 1.00

M-Chloro

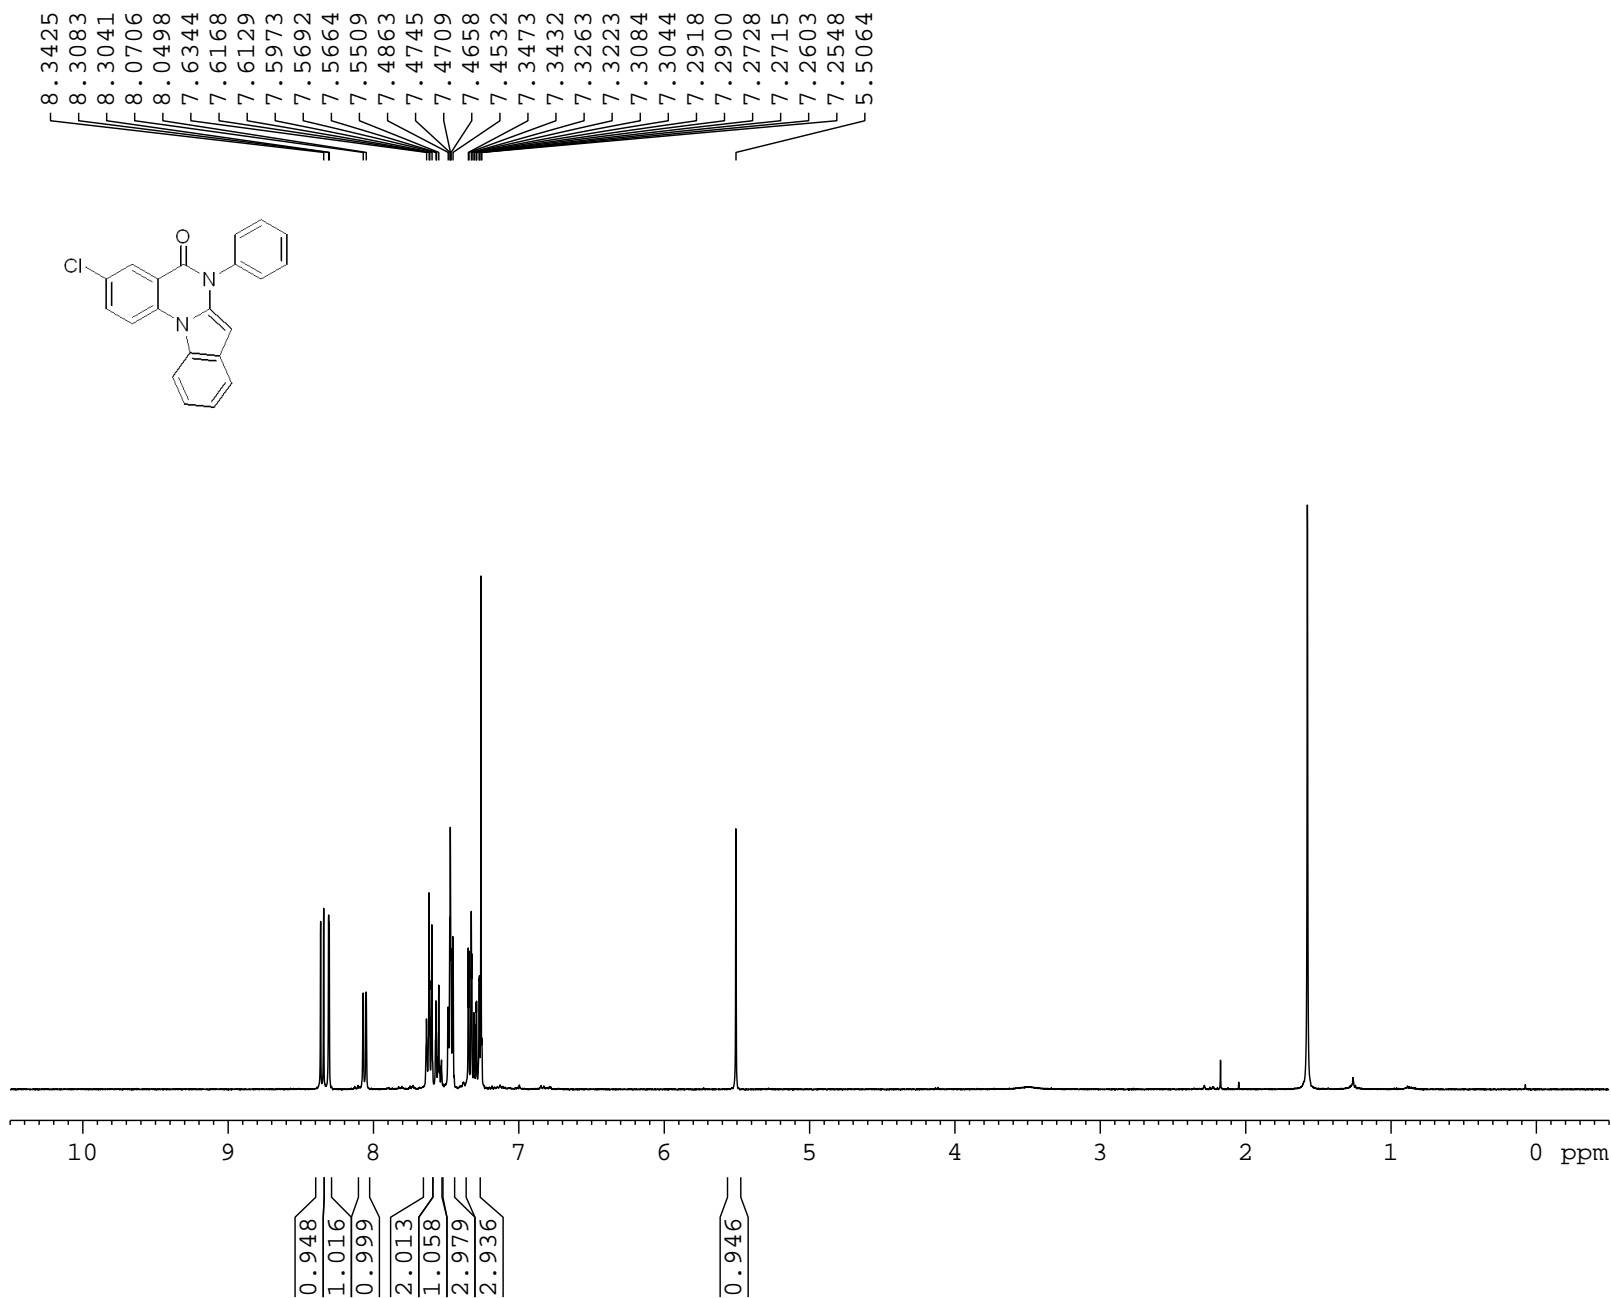

Current Data Parameters  
NAME Trimurthulu  
EXPNO 284  
PROCNO 1

F2 - Acquisition Parameters  
Date\_ 20130515  
Time 21.07  
INSTRUM spect  
PROBHD 5 mm BBO BB-1H  
PULPROG zg30  
TD 32768  
SOLVENT CDCl3  
NS 16  
DS 0  
SWH 7246.377 Hz  
FIDRES 0.221142 Hz  
AQ 2.2611110 sec  
RG 256  
DW 69.000 usec  
DE 6.50 usec  
TE 299.4 K  
D1 2.0000000 sec  
TD0 1

===== CHANNEL f1 =====  
NUC1 1H  
P1 11.90 usec  
PL1 3.00 dB  
SFO1 400.1324008 MHz

F2 - Processing parameters  
SI 16384  
SF 400.1300091 MHz  
WDW EM  
SSB 0  
LB 0 Hz  
GB 0  
PC 1.00

M- cl final

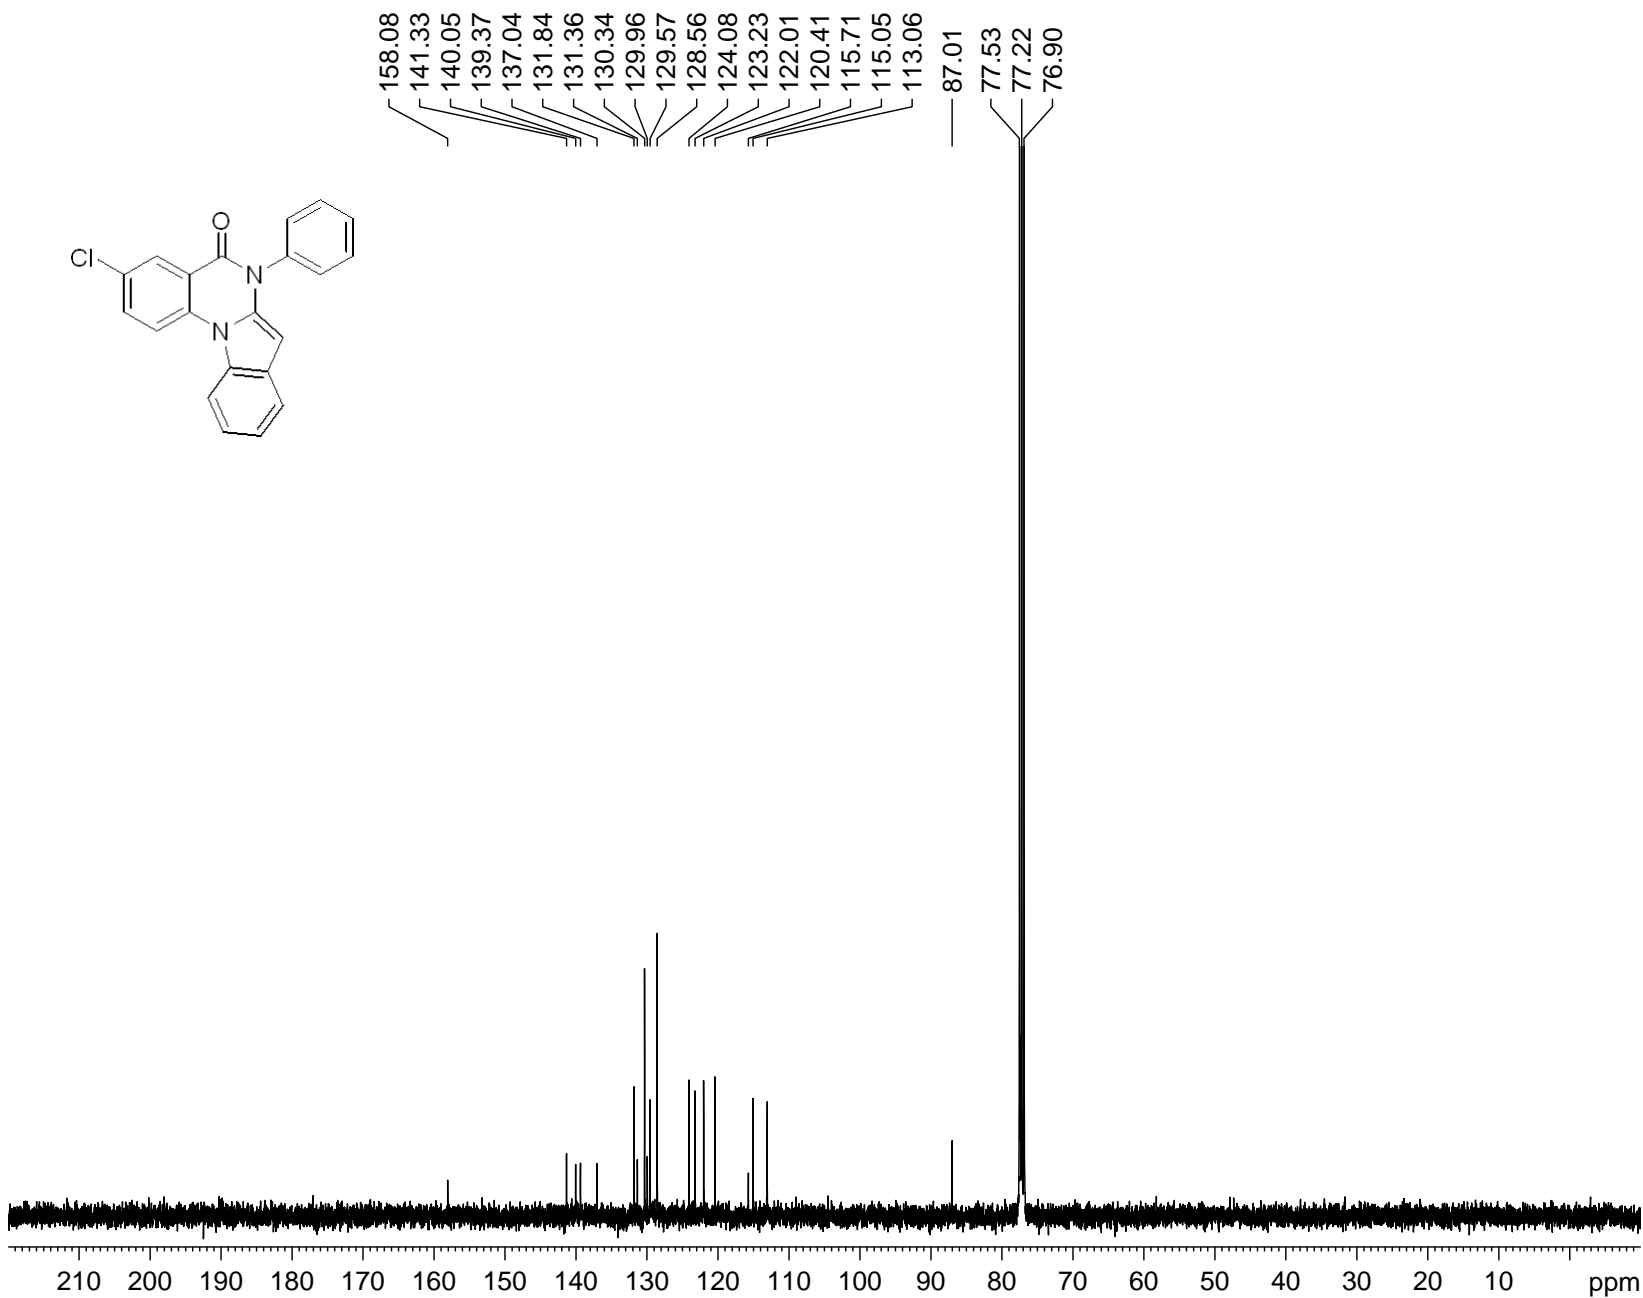

Current Data Parameters

NAME Trimurthulu  
EXPNO 287  
PROCNO 1

F2 - Acquisition Parameters

Date\_ 20130518  
Time 18.16  
INSTRUM spect  
PROBHD 5 mm BBO BB-1H  
PULPROG zgpg30  
TD 32768  
SOLVENT CDCl3  
NS 520  
DS 0  
SWH 24038.461 Hz  
FIDRES 0.733596 Hz  
AQ 0.6816452 sec  
RG 32768  
DW 20.800 usec  
DE 6.50 usec  
TE 300.4 K  
D1 2.0000000 sec  
D11 0.0300000 sec  
TD0 1

===== CHANNEL f1 =====

NUC1 13C  
P1 10.50 usec  
PL1 7.00 dB  
SFO1 100.6233325 MHz

===== CHANNEL f2 =====

CPDPRG2 waltz16  
NUC2 1H  
PCPD2 90.00 usec  
PL2 -0.60 dB  
PL12 15.00 dB  
PL13 18.00 dB  
SFO2 400.1316005 MHz

F2 - Processing parameters

SI 32768  
SF 100.6127477 MHz  
WDW EM  
SSB 0  
LB 1.00 Hz  
GB 0  
PC 1.00



<sup>1</sup>H Dimethoxy-final

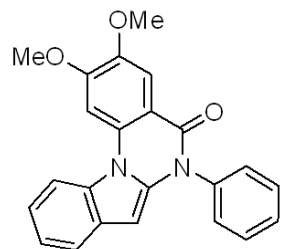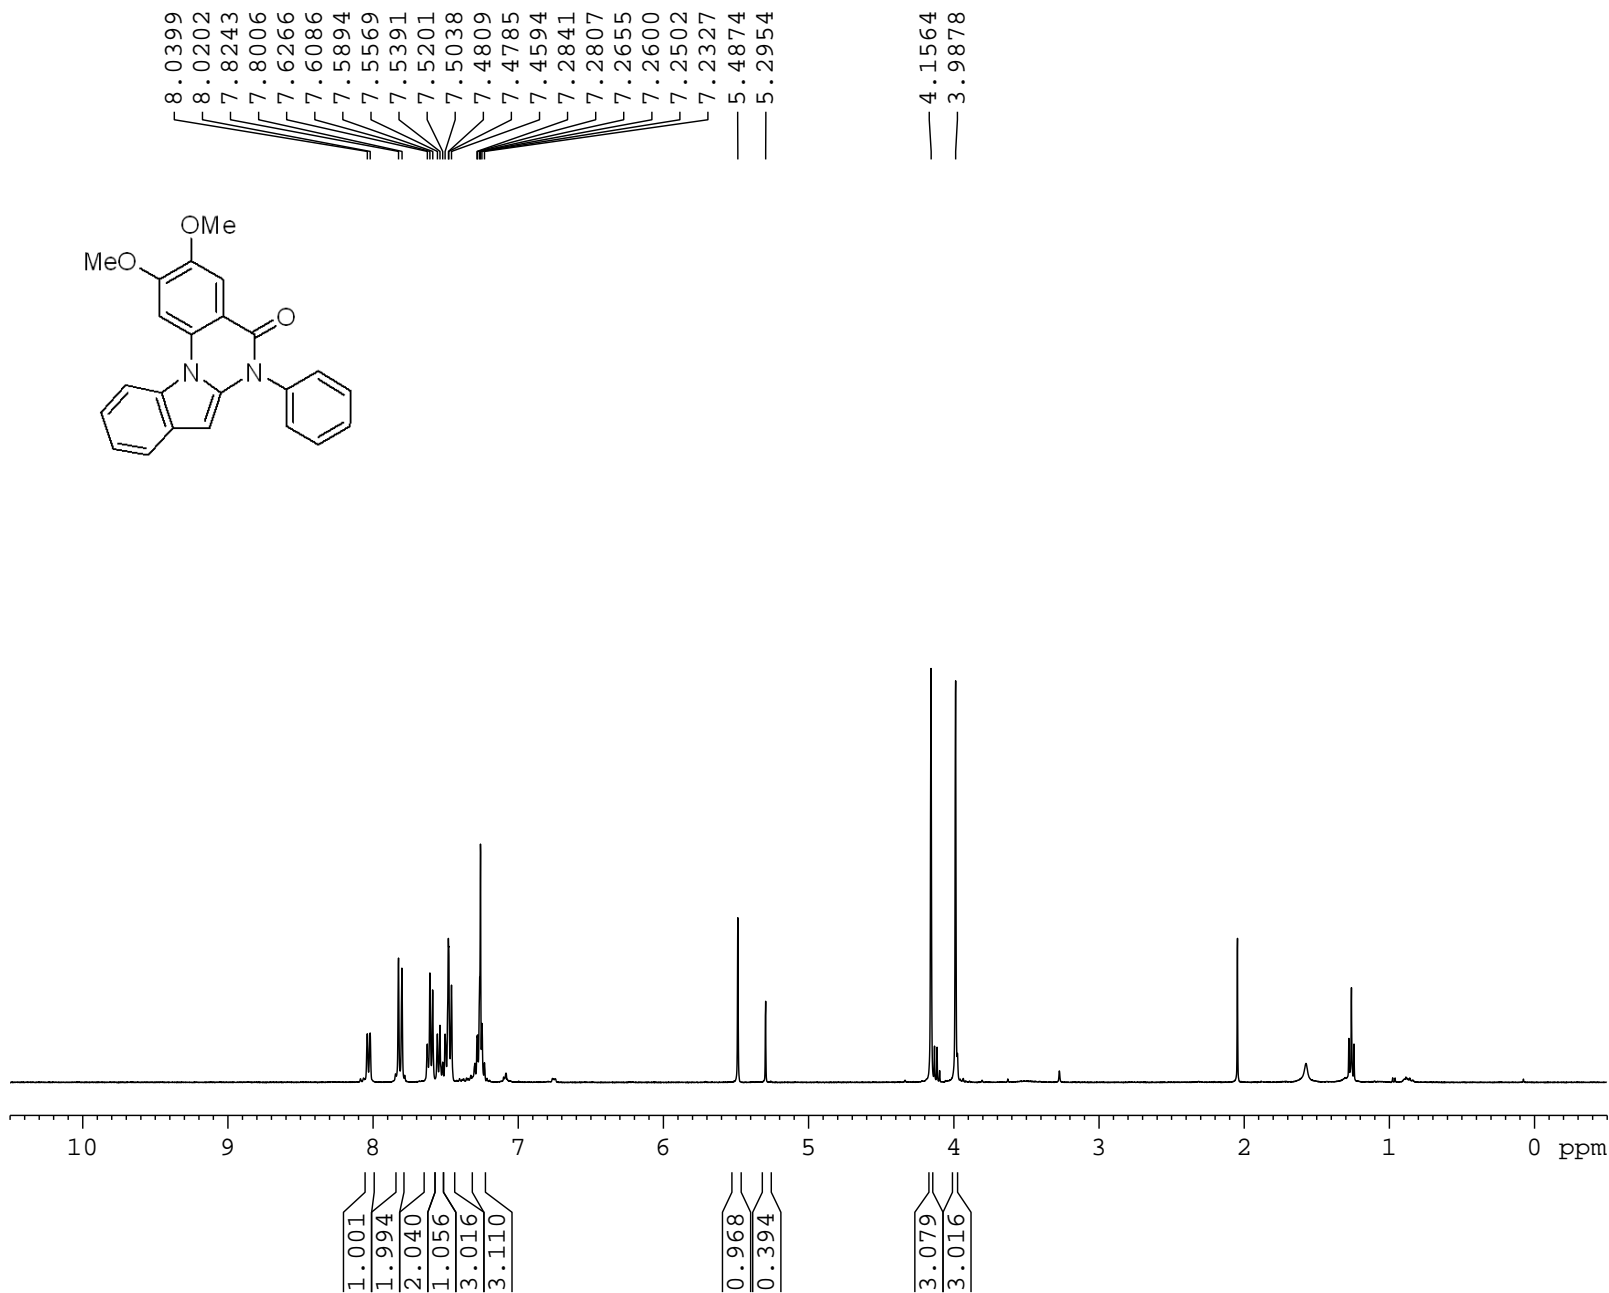

Current Data Parameters  
NAME Trimurthulu  
EXPNO 33  
PROCNO 1

F2 - Acquisition Parameters  
Date\_ 20120509  
Time 0.12  
INSTRUM spect  
PROBHD 5 mm BBO BB-1H  
PULPROG zg30  
TD 32768  
SOLVENT CDCl3  
NS 16  
DS 0  
SWH 7246.377 Hz  
FIDRES 0.221142 Hz  
AQ 2.2611110 sec  
RG 161.3  
DW 69.000 usec  
DE 6.50 usec  
TE 299.3 K  
D1 2.00000000 sec  
TD0 1

===== CHANNEL f1 =====  
NUC1 1H  
P1 11.70 usec  
PL1 4.00 dB  
SFO1 400.1324008 MHz

F2 - Processing parameters  
SI 16384  
SF 400.1300085 MHz  
WDW EM  
SSB 0  
LB 0 Hz  
GB 0  
PC 1.00

<sup>13</sup>C of dimethoxy final

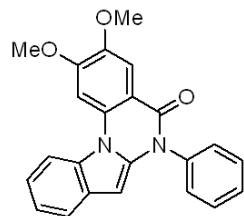

158.52  
154.69  
145.74  
139.59  
137.44  
134.81  
130.78  
130.18  
129.80  
129.30  
128.71  
122.54  
121.13  
120.22  
112.42  
110.78  
109.66  
98.21  
85.54  
77.55  
77.23  
76.92  
56.65  
56.42

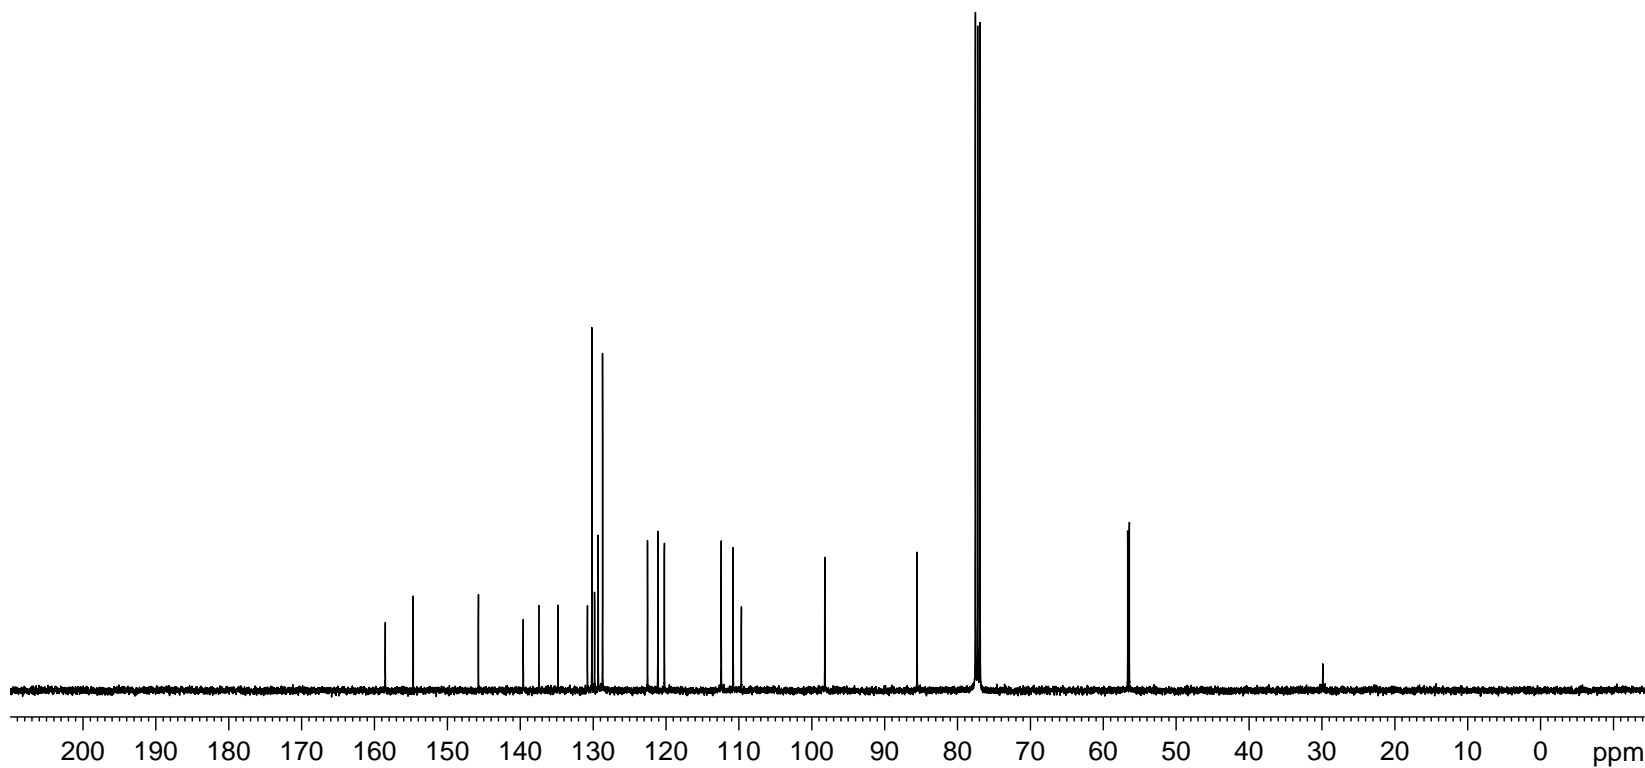

Current Data Parameters

NAME Trimurthulu  
EXPNO 359  
PROCNO 1

F2 - Acquisition Parameters

Date\_ 20131005  
Time 18.47  
INSTRUM spect  
PROBHD 5 mm BBO BB-1H  
PULPROG zgpg30  
TD 32768  
SOLVENT CDCl3  
NS 647  
DS 0  
SWH 24038.461 Hz  
FIDRES 0.733596 Hz  
AQ 0.6816452 sec  
RG 8192  
DW 20.800 usec  
DE 6.50 usec  
TE 299.1 K  
D1 2.00000000 sec  
D11 0.03000000 sec  
TD0 1

==== CHANNEL f1 =====

NUC1 13C  
P1 9.40 usec  
PL1 7.00 dB  
SFO1 100.6233325 MHz

==== CHANNEL f2 =====

CPDPRG2 waltz16  
NUC2 1H  
PCPD2 90.00 usec  
PL2 3.00 dB  
PL12 20.70 dB  
PL13 23.70 dB  
SFO2 400.1316005 MHz

F2 - Processing parameters

SI 32768  
SF 100.6127521 MHz  
WDW EM  
SSB 0  
LB 1.00 Hz  
GB 0  
PC 1.00

5-Benzoyloxy-Dimethoxy-indole

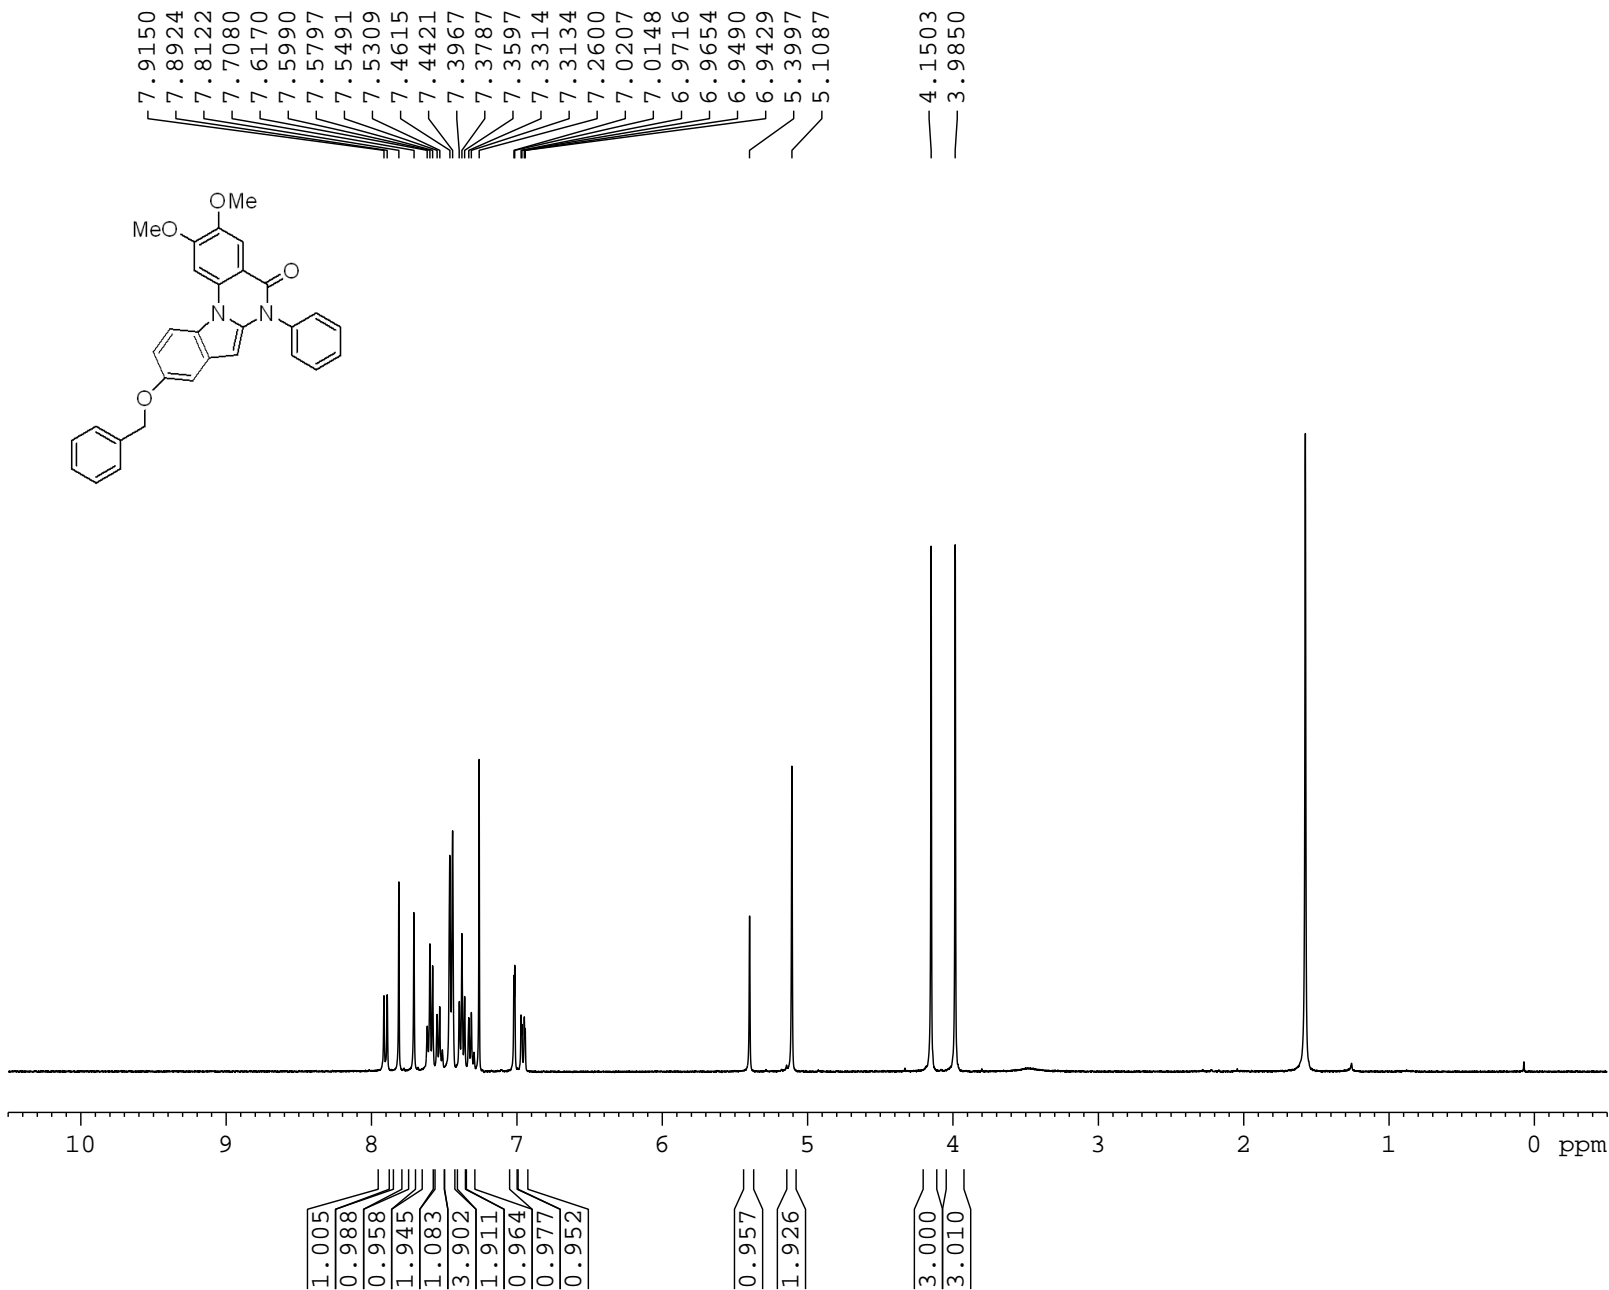

Current Data Parameters  
NAME Trimurthulu  
EXPNO 295  
PROCNO 1

F2 - Acquisition Parameters  
Date\_ 20130521  
Time 15.47  
INSTRUM spect  
PROBHD 5 mm BBO BB-1H  
PULPROG zg30  
TD 32768  
SOLVENT CDCl3  
NS 16  
DS 0  
SWH 7246.377 Hz  
FIDRES 0.221142 Hz  
AQ 2.2611110 sec  
RG 322.5  
DW 69.000 usec  
DE 6.50 usec  
TE 300.3 K  
D1 2.0000000 sec  
TD0 1

===== CHANNEL f1 =====  
NUC1 1H  
P1 11.90 usec  
PL1 3.00 dB  
SFO1 400.1324008 MHz

F2 - Processing parameters  
SI 16384  
SF 400.1300093 MHz  
WDW EM  
SSB 0  
LB 0 Hz  
GB 0  
PC 1.00

Dimethyl 5-Benzoyloxy

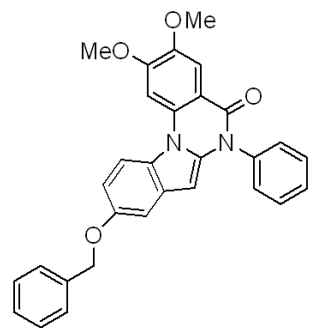

158.57  
154.93  
154.90  
145.73  
140.21  
137.50  
137.44  
134.87  
130.90  
130.21  
129.34  
128.79  
128.71  
128.10  
127.65  
125.93  
113.18  
110.90  
110.72  
109.47  
104.24  
97.90  
85.57  
77.54  
77.23  
76.91  
70.78  
56.75  
56.52

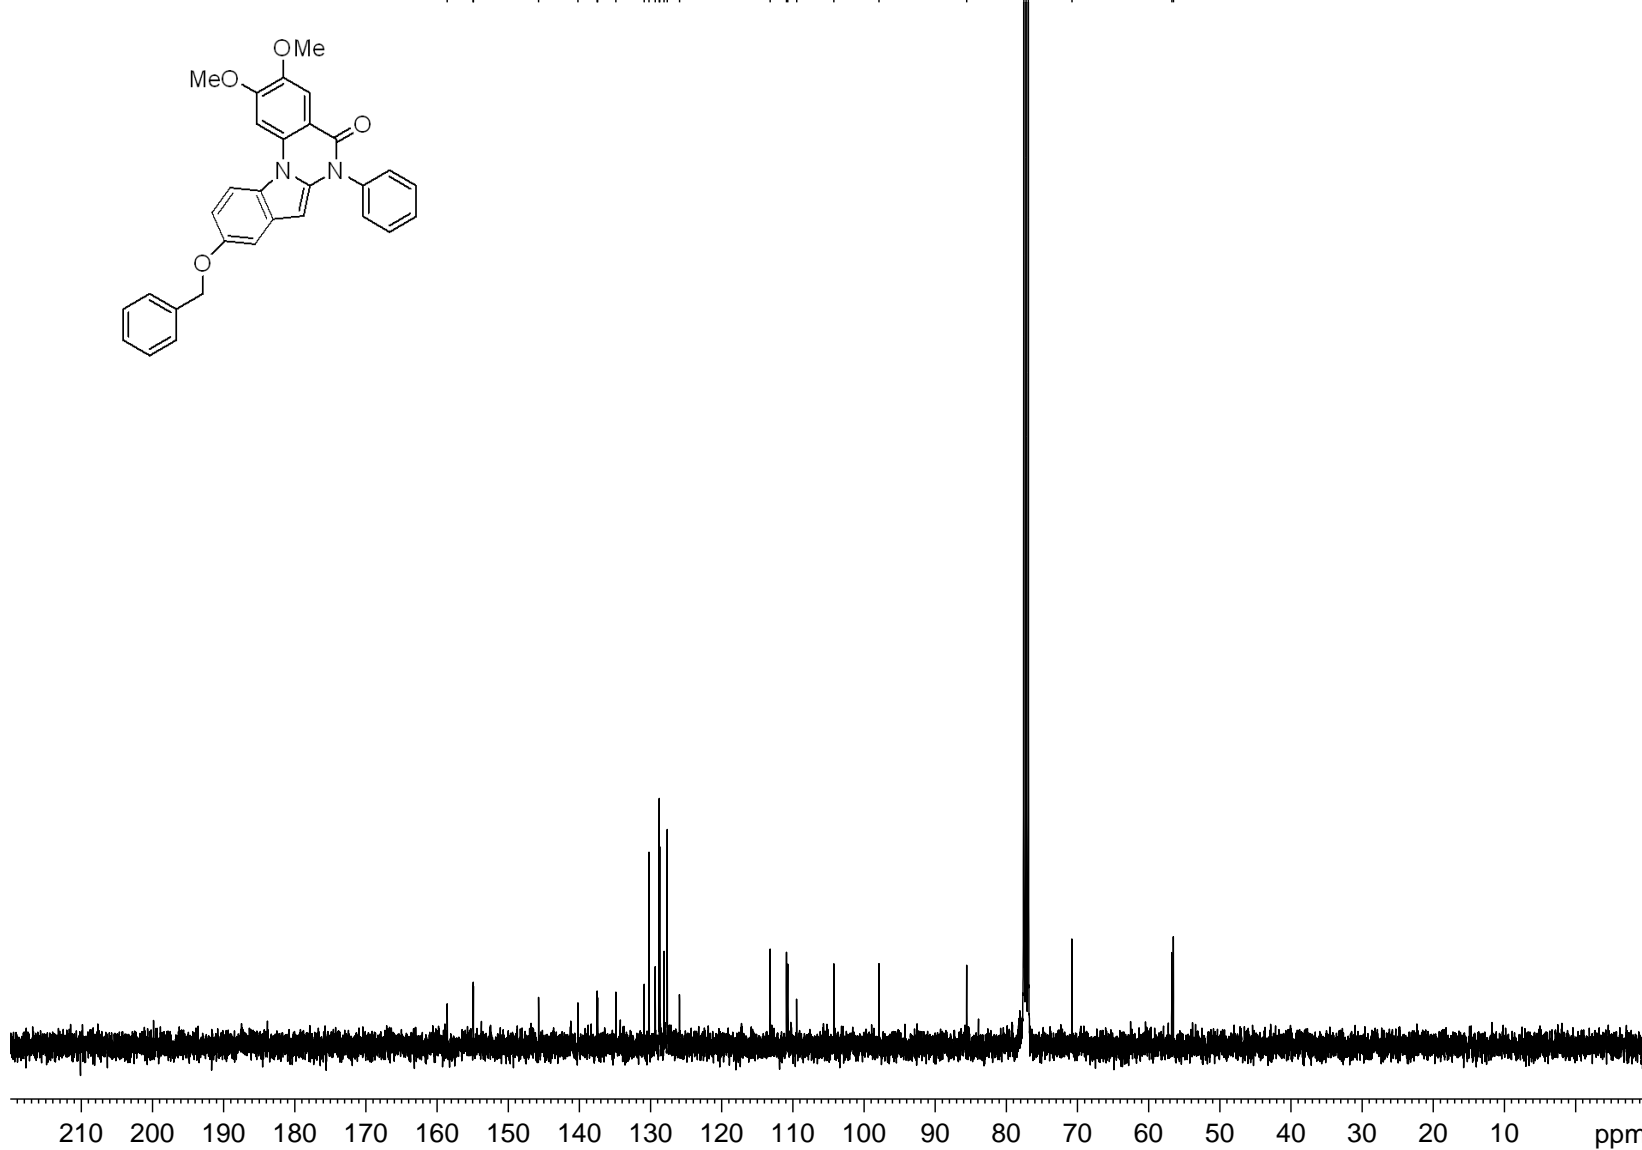

Current Data Parameters

NAME Trimurthulu  
EXPNO 298  
PROCNO 1

F2 - Acquisition Parameters

Date\_ 20130522  
Time 18.21  
INSTRUM spect  
PROBHD 5 mm BBO BB-1H  
PULPROG zgpg30  
TD 32768  
SOLVENT CDCl3  
NS 743  
DS 0  
SWH 24038.461 Hz  
FIDRES 0.733596 Hz  
AQ 0.6816452 sec  
RG 32768  
DW 20.800 usec  
DE 6.50 usec  
TE 300.2 K  
D1 2.0000000 sec  
D11 0.0300000 sec  
TD0 1

==== CHANNEL f1 =====

NUC1 13C  
P1 9.40 usec  
PL1 7.00 dB  
SFO1 100.6233325 MHz

==== CHANNEL f2 =====

CPDPRG2 waltz16  
NUC2 1H  
PCPD2 90.00 usec  
PL2 3.00 dB  
PL12 20.70 dB  
PL13 23.70 dB  
SFO2 400.1316005 MHz

F2 - Processing parameters

SI 32768  
SF 100.6127477 MHz  
WDW EM  
SSB 0  
LB 1.00 Hz  
GB 0  
PC 1.00

<sup>1</sup>H of Diphenyl benzyl aniline-Final

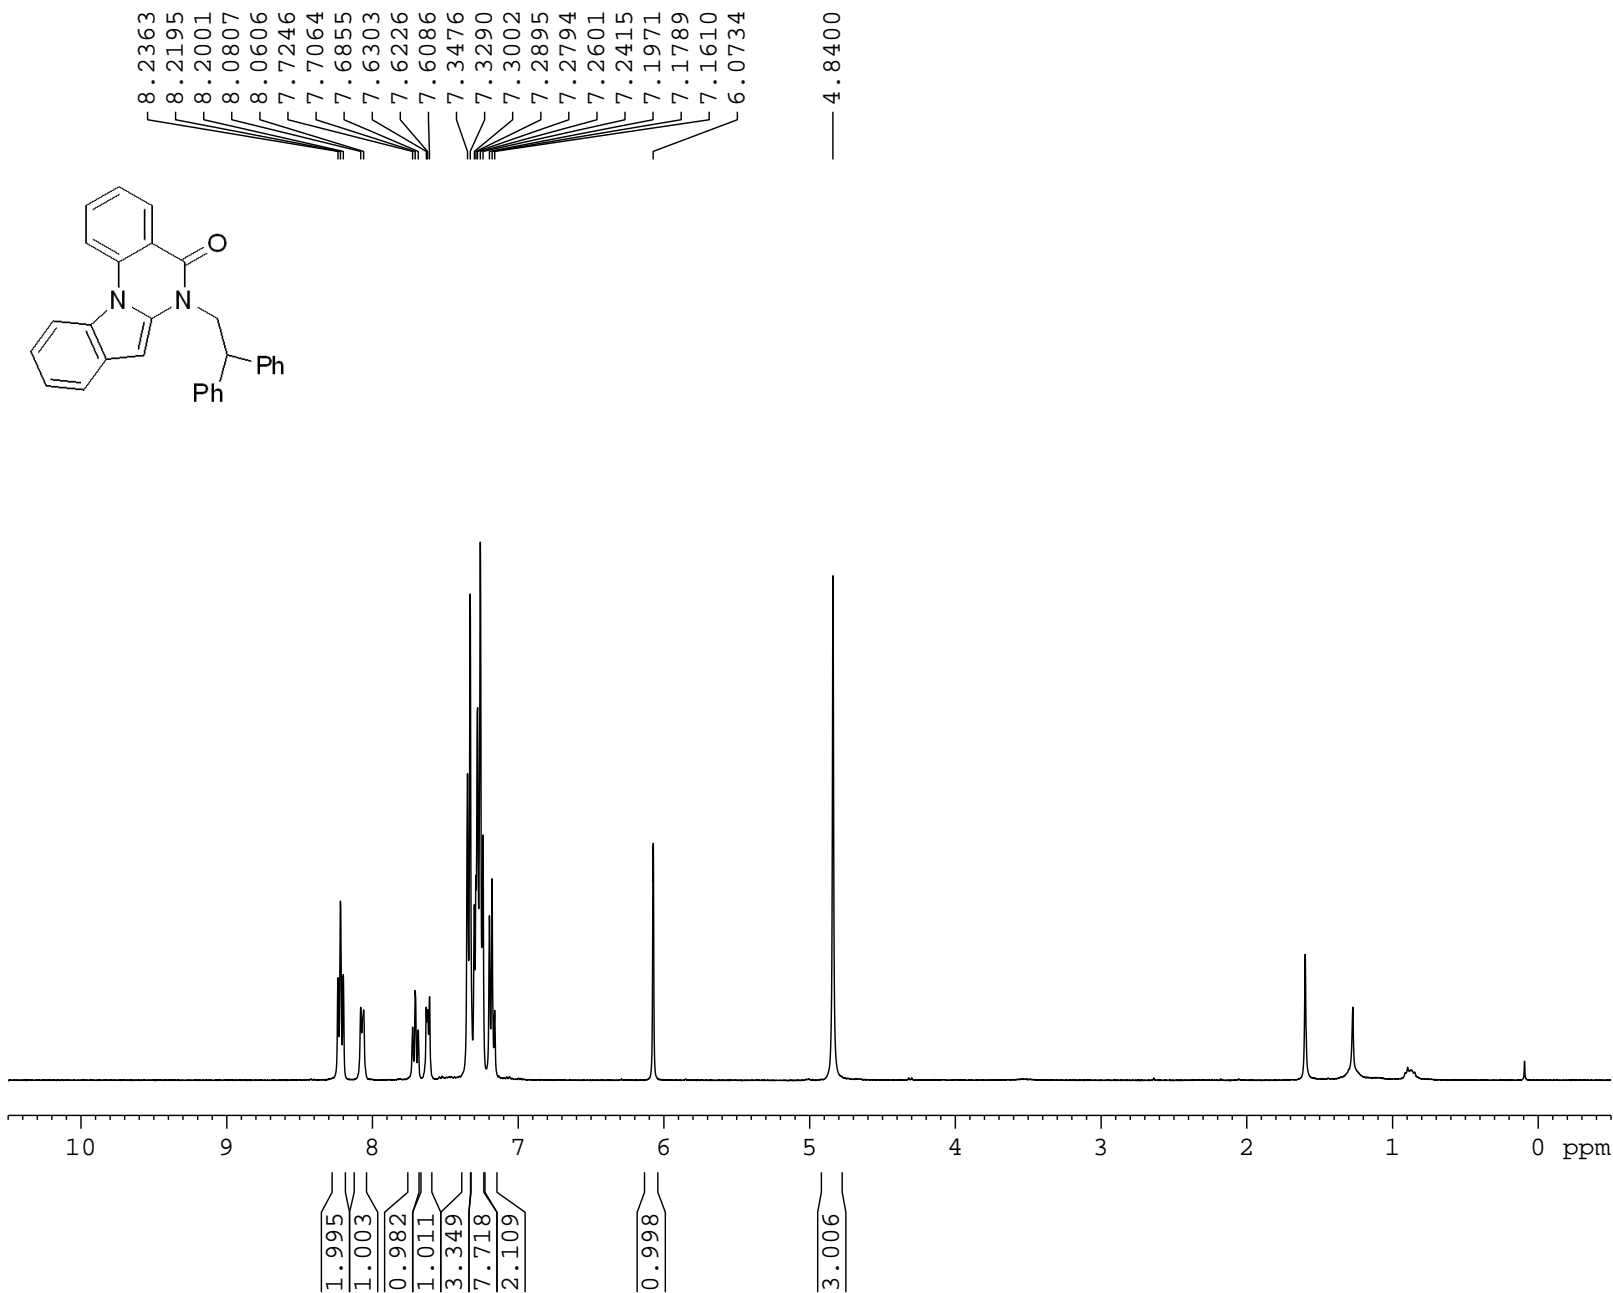

Current Data Parameters  
NAME Trimurthulu  
EXPNO 132  
PROCNO 1

F2 - Acquisition Parameters  
Date\_ 20120817  
Time 13.06  
INSTRUM spect  
PROBHD 5 mm BBO BB-1H  
PULPROG zg30  
TD 32768  
SOLVENT CDCl3  
NS 16  
DS 0  
SWH 7246.377 Hz  
FIDRES 0.221142 Hz  
AQ 2.2611110 sec  
RG 128  
DW 69.000 usec  
DE 6.50 usec  
TE 299.2 K  
D1 2.00000000 sec  
TD0 1

===== CHANNEL f1 =====  
NUC1 1H  
P1 11.70 usec  
PL1 4.00 dB  
SFO1 400.1324008 MHz

F2 - Processing parameters  
SI 16384  
SF 400.1300095 MHz  
WDW EM  
SSB 0  
LB 0 Hz  
GB 0  
PC 1.00

13C

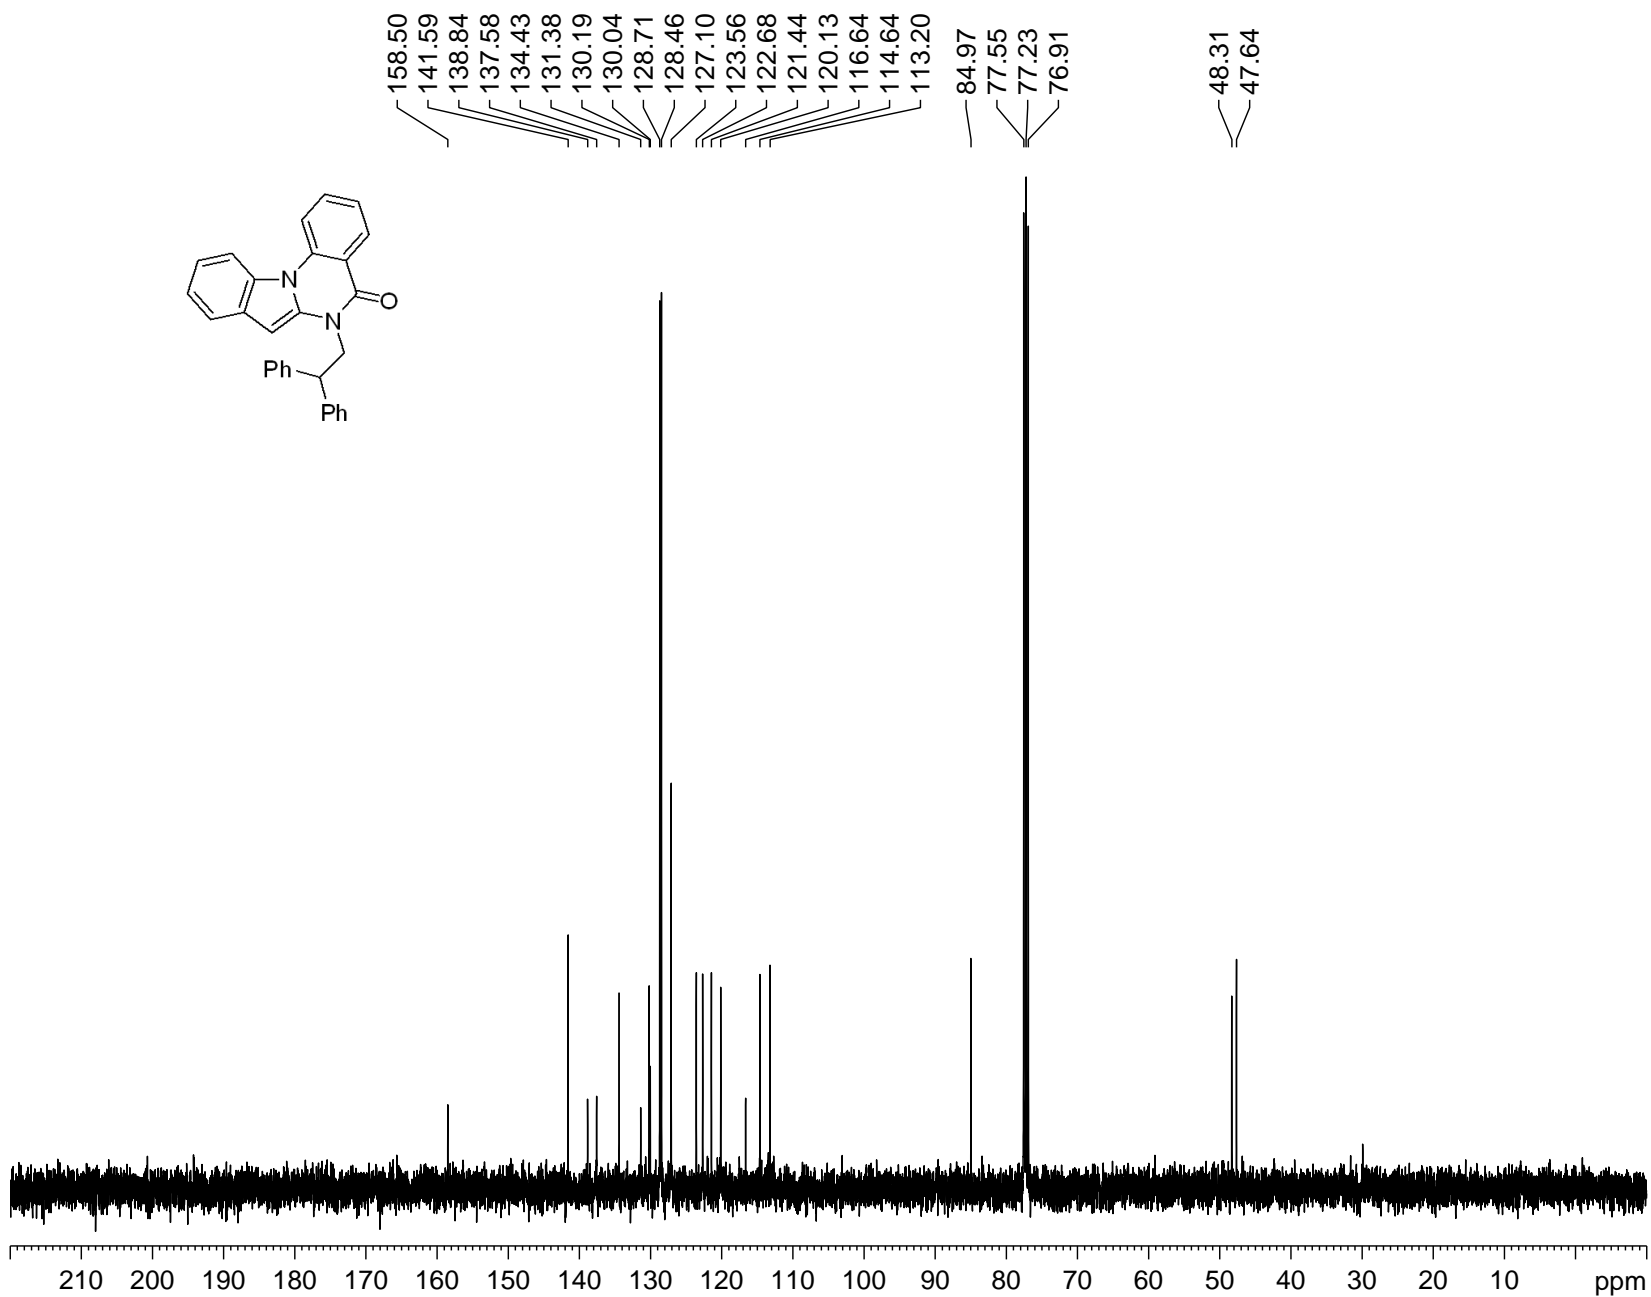

NAME Trimurthulu  
EXPNO 133  
PROCNO 1  
Date\_ 20120817  
Time 13.10  
INSTRUM spect  
PROBHD 5 mm BBO BB-1H  
PULPROG zgpg30  
TD 32768  
SOLVENT CDCl3  
NS 109  
DS 0  
SWH 24038.461 Hz  
FIDRES 0.733596 Hz  
AQ 0.6816452 sec  
RG 32768  
DW 20.800 usec  
DE 6.50 usec  
TE 299.5 K  
D1 2.00000000 sec  
D11 0.03000000 sec  
TD0 1

===== CHANNEL f1 =====  
NUC1 13C  
P1 8.90 usec  
PL1 7.00 dB  
SFO1 100.6233325 MHz

===== CHANNEL f2 =====  
CPDPRG2 waltz16  
NUC2 1H  
PCPD2 90.00 usec  
PL2 3.80 dB  
PL12 21.60 dB  
PL13 24.60 dB  
SFO2 400.1316005 MHz  
SI 32768  
SF 100.6127503 MHz  
WDW EM  
SSB 0  
LB 1.00 Hz  
GB 0  
PC 1.00

1H dodecane final

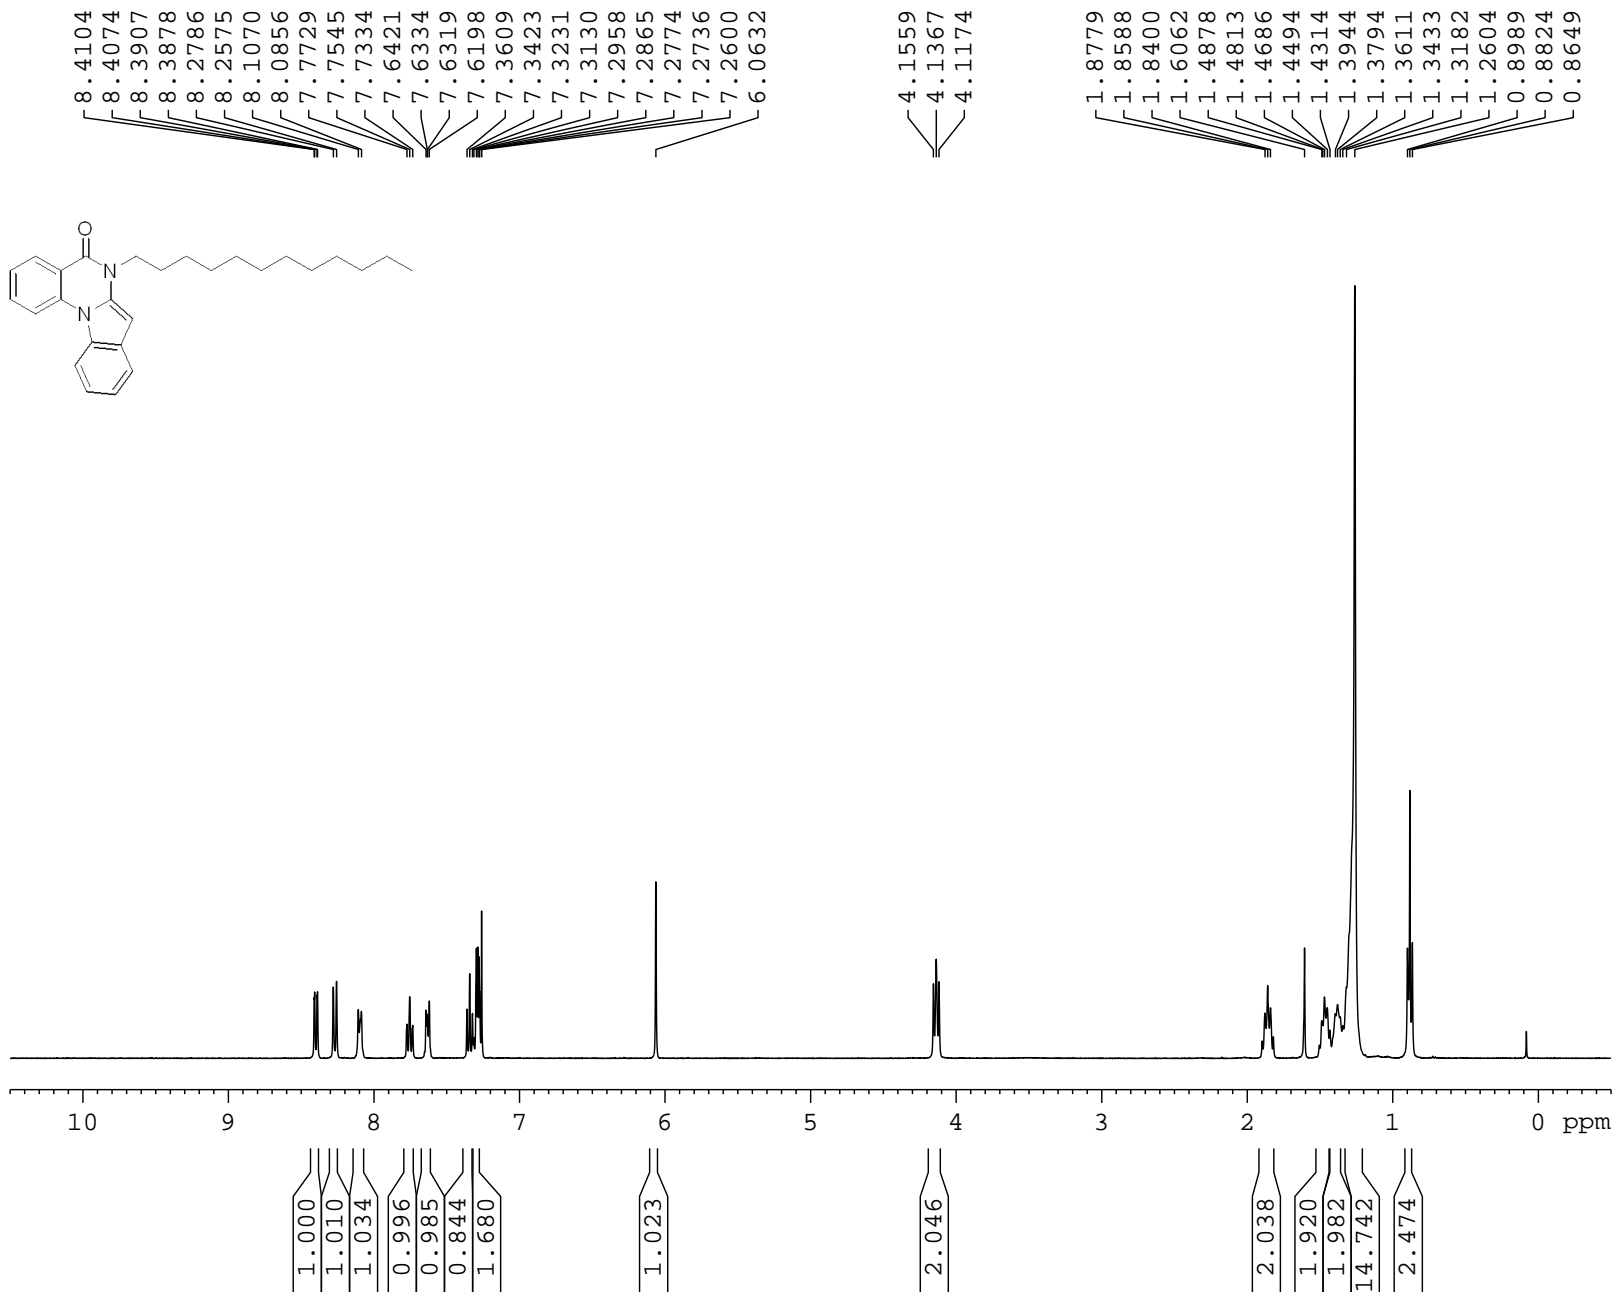

Current Data Parameters  
NAME Trimurthulu  
EXPNO 130  
PROCNO 1

F2 - Acquisition Parameters  
Date\_ 20120817  
Time 12.42  
INSTRUM spect  
PROBHD 5 mm BBO BB-1H  
PULPROG zg30  
TD 32768  
SOLVENT CDCl3  
NS 16  
DS 0  
SWH 7246.377 Hz  
FIDRES 0.221142 Hz  
AQ 2.2611110 sec  
RG 114  
DW 69.000 usec  
DE 6.50 usec  
TE 299.2 K  
D1 2.00000000 sec  
TD0 1

===== CHANNEL f1 =====  
NUC1 1H  
P1 11.70 usec  
PL1 4.00 dB  
SFO1 400.1324008 MHz

F2 - Processing parameters  
SI 16384  
SF 400.1300087 MHz  
WDW EM  
SSB 0  
LB 0 Hz  
GB 0  
PC 1.00

13C

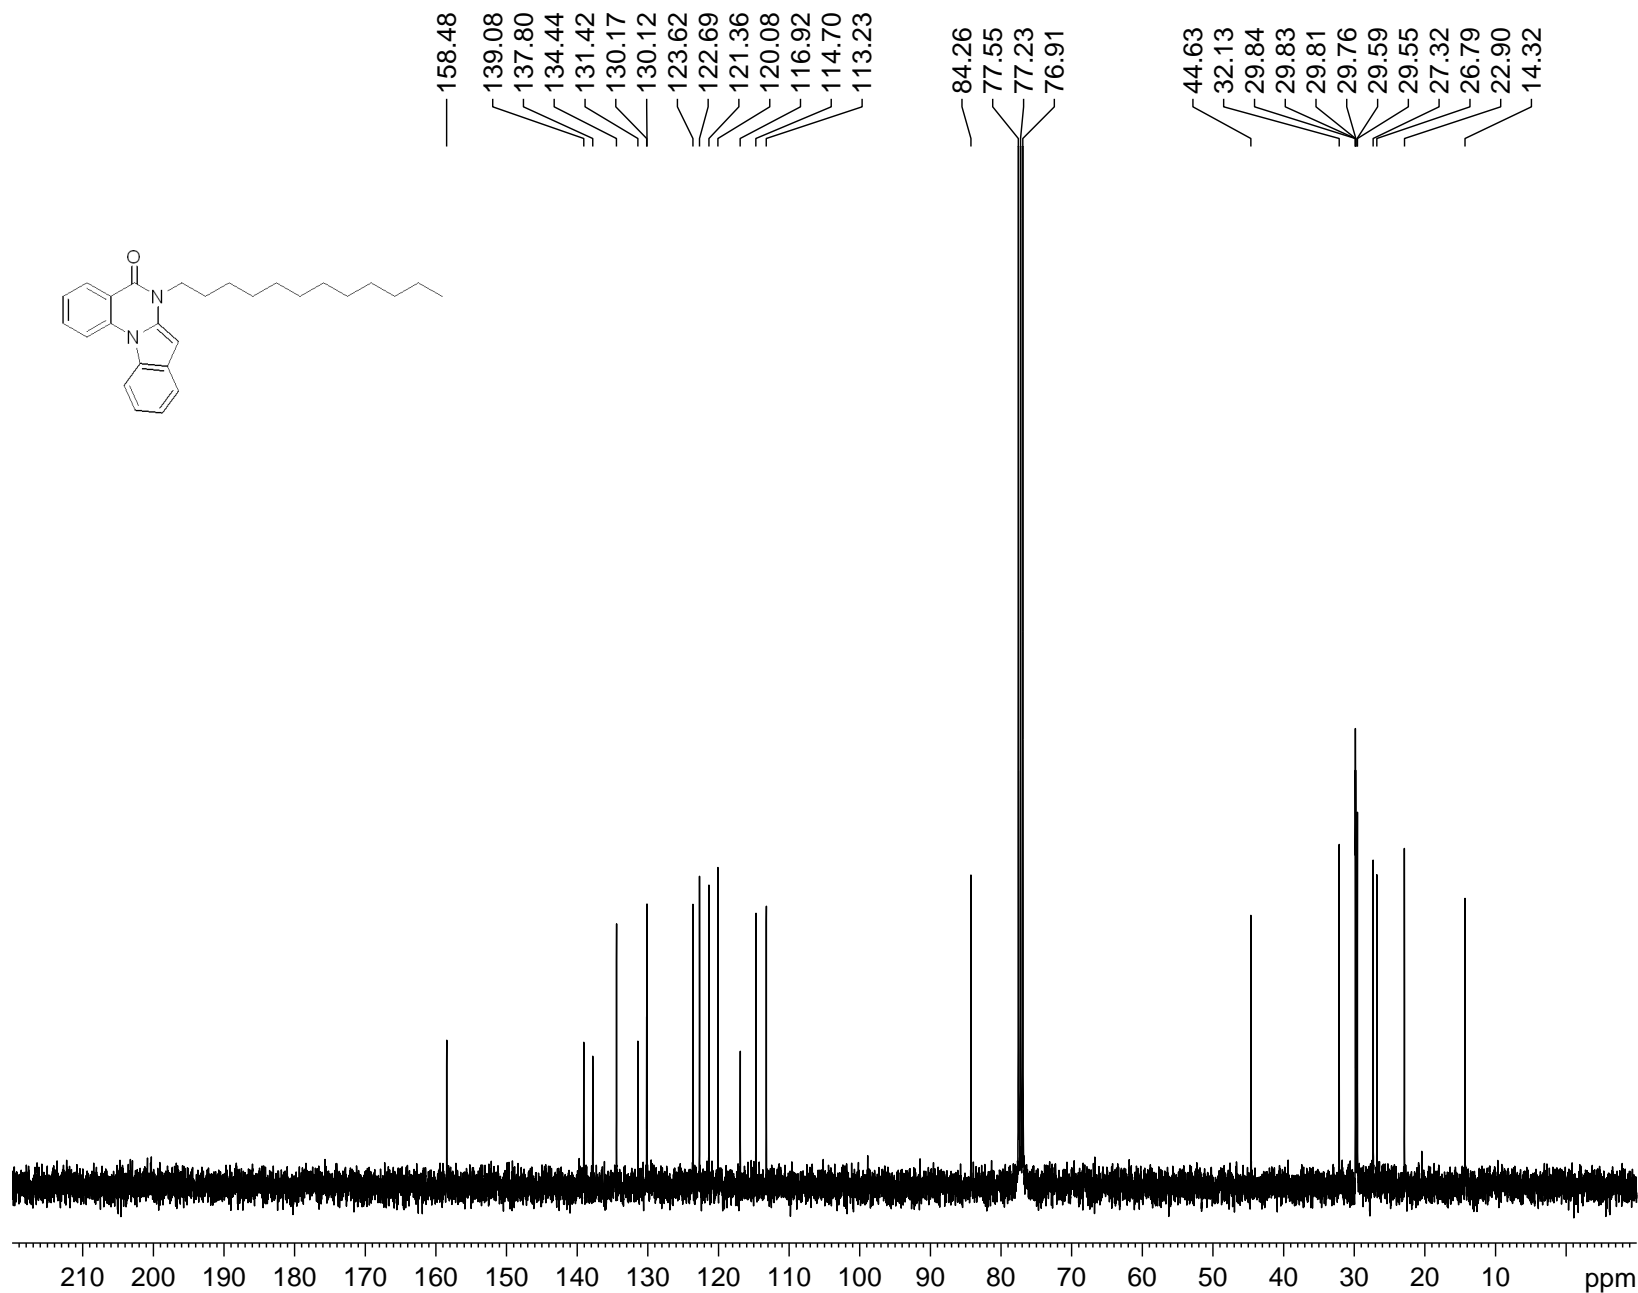

Current Data Parameters

NAME Trimurthulu  
EXPNO 131  
PROCNO 1

F2 - Acquisition Parameters

Date\_ 20120817  
Time 12.51  
INSTRUM spect  
PROBHD 5 mm BBO BB-1H  
PULPROG zgpg30  
TD 32768  
SOLVENT CDCl3  
NS 290  
DS 0  
SWH 24038.461 Hz  
FIDRES 0.733596 Hz  
AQ 0.6816452 sec  
RG 32768  
DW 20.800 usec  
DE 6.50 usec  
TE 299.5 K  
D1 2.00000000 sec  
D11 0.03000000 sec  
TD0 1

===== CHANNEL f1 =====

NUC1 13C  
P1 8.90 usec  
PL1 7.00 dB  
SFO1 100.6233325 MHz

===== CHANNEL f2 =====

CPDPRG2 waltz16  
NUC2 1H  
PCPD2 90.00 usec  
PL2 3.80 dB  
PL12 21.60 dB  
PL13 24.60 dB  
SFO2 400.1316005 MHz

F2 - Processing parameters

SI 32768  
SF 100.6127477 MHz  
WDW EM  
SSB 0  
LB 1.00 Hz  
GB 0  
PC 1.00
